# Supplementary material for: Bacterial lifestyle switch in response to algal metabolites
Source: eLife. 2023 Jan 24;12:e84400. doi: 10.7554/eLife.84400 (PMC9873259; doi:10.7554/eLife.84400)
Supplement: Figure 1—source data 1. [file elife-84400-fig1-data1.xlsx]

## Sheet: Figure 1—source data 1
E. huxleyi and Sulfitobacter D7 abundances
No DMSP	Average of abundance/mL					Standard Deviation of abundance/mL
	Algae		Bacteria			Algae		Bacteria
Time (d)	E. huxleyi	E. huxleyi + D7	E. huxleyi + D7		Time (d)	E. huxleyi	E. huxleyi + D7	E. huxleyi + D7
0	557205	610527	1000		0	22968.1	15294.8	0
1	936745	1.04912e+06	2.02801e+06		1	39748.5	38208	112535
2	1.69648e+06	1.75777e+06	6.70469e+06		2	35148.3	41304.9	21340.6
3	2.75466e+06	2.95801e+06	8.17174e+06		3	135061	72390.6	172389
4	4.21544e+06	4.31879e+06	1.30602e+07		4	9308.2	71897.1	910320
5	5.44926e+06	5.55254e+06	1.98491e+07		5	110397	66349.6	1.01499e+06
6	5.79715e+06	5.61898e+06	3.45812e+07		6	245870	274129	865986
7	5.7962e+06	5.0922e+06	5.07022e+07		7	37586.6	174875	3.43587e+06
8	4.57357e+06	2.04158e+06	9.38298e+07		8	228411	378034	2.95094e+07
9	4.87576e+06	1.91084e+06	1.48735e+08		9	151679	384129	7.68855e+06
10	5.20013e+06	905056	1.48365e+08		10	145510	350907	8.72543e+06
11	5.13359e+06	290425	1.77049e+08		11	607033	111143	2.86012e+06
12	5.68605e+06	121754	1.78555e+08		12	253486	25892.1	3.26893e+06
13	5.35679e+06	56548.6	1.92567e+08		13	145138	12613	1.89982e+06
+DMSP	Average of abundance/mL					Standard Deviation of abundance/mL
	Algae		Bacteria			Algae		Bacteria
Time (d)	E. huxleyi	E. huxleyi + D7	E. huxleyi + D7		Time (d)	E. huxleyi	E. huxleyi + D7	E. huxleyi + D7
0	656505	625168	1000		0	1990.87	11029.5	0
1	1.01919e+06	830651	1.93983e+06		1	42540.3	27736.2	110563
2	1.69391e+06	1.56271e+06	8.74211e+06		2	72319.3	32019.5	476127
3	2.65464e+06	2.79089e+06	1.44084e+07		3	149627	50943.9	122466
4	3.78311e+06	3.11395e+06	3.08396e+07		4	130932	132664	5.57039e+06
5	4.9279e+06	2.36069e+06	5.54429e+07		5	64348.3	355904	5.07957e+06
6	5.44866e+06	844643	9.18764e+07		6	170228	654296	7.45209e+06
7	5.42648e+06	366992	1.07878e+08		7	168428	479949	6.1283e+06
8	4.4196e+06	14975.3	1.30061e+08		8	176100	15535.1	6.97137e+06
9	5.03224e+06	4436.4	1.50409e+08		9	151077	3498.18	8.89931e+06
10	5.37252e+06	1648.25	1.18735e+08		10	30118.5	872.938	9.83158e+06
11	5.16272e+06	786.365	1.26371e+08		11	349118	342.032	1.05881e+07
12	5.80156e+06	456.114	1.20049e+08		12	44045.2	164.442	9.40739e+06
13	5.4809e+06	354.988	1.382e+08		13	155062	143.428	8.57579e+06
