# Supplementary material for: Bacterial lifestyle switch in response to algal metabolites
Source: eLife. 2023 Jan 24;12:e84400. doi: 10.7554/eLife.84400 (PMC9873259; doi:10.7554/eLife.84400)
Supplement: Figure 1—source data 2. [file elife-84400-fig1-data2.xlsx]

## Sheet: Figure 1—source data 2
Figure 1—source data 2. RNA sequencing data of Sulfitobacter D7 transcriptome. Raw reads counts (.raw), normalized counts (.norm) and the log-normalized expression values (.RLD) are shown for the triplicates of all tretments. Differential expression was calculated using DESeq2. Log2FoldChange, p-value, and FDR-adjusted p-value are shown for the relevant treatments comparisons. Basemean (the avera…
Locus tag	Chromosome/Plasmid	Start	End	Strand	Annotationa	Raw reads count															Normalized counts															Log-normalized expression values (RLD)
						ExpCM-1.raw	ExpCM-2.raw	ExpCM-3.raw	ExpCM+DMSP-1.raw	ExpCM+DMSP-2.raw	ExpCM+DMSP-3.raw	StatCM-1.raw	StatCM-2.raw	StatCM-3.raw	MM-1.raw	MM-2.raw	MM-3.raw	MM+DMSP-1.raw	MM+DMSP-2.raw	MM+DMSP-3.raw	ExpCM-1.norm	ExpCM-2.norm	ExpCM-3.norm	ExpCM+DMSP-1.norm	ExpCM+DMSP-2.norm	ExpCM+DMSP-3.norm	StatCM-1.norm	StatCM-2.norm	StatCM-3.norm	MM-1.norm	MM-2.norm	MM-3.norm	MM+DMSP-1.norm	MM+DMSP-2.norm	MM+DMSP-3.norm	ExpCM-1.RLD	ExpCM-2.RLD	ExpCM-3.RLD	ExpCM+DMSP-1.RLD	ExpCM+DMSP-2.RLD	ExpCM+DMSP-3.RLD	StatCM-1.RLD	StatCM-2.RLD	StatCM-3.RLD	MM-1.RLD	MM-2.RLD	MM-3.RLD	MM+DMSP-1.RLD	MM+DMSP-2.RLD
B5M07_00005	CP020694 (Chromosome)	101	1462	+	chromosomal replication initiation protein DnaA	35	39	51	400	361	330	185	72	258	1458	964	805	2352	1453	648	134.068	135.373	164.777	420.74	410.105	269.447	255.54	127.105	311.737	499.145	440.041	293.008	541.053	717.557	521.478	7.44852	7.4565	7.6429	8.59571	8.56853	8.1307	8.07674	7.39191	8.28104	8.77856	8.64367	8.21688	8.86548	9.17299
B5M07_00010	CP020694 (Chromosome)	1626	2744	+	DNA polymerase III subunit beta	7	33	48	89	93	125	31	19	65	481	326	378	781	405	115	26.8135	114.547	155.084	93.6146	105.65	102.063	42.8201	33.5415	78.5383	164.67	148.81	137.587	179.661	200.007	92.5463	5.44267	6.77816	7.09531	6.5718	6.69605	6.66049	5.80911	5.59394	6.39413	7.16439	7.05606	6.973	7.25827	7.37378
B5M07_00015	CP020694 (Chromosome)	2804	3901	+	DNA replication/repair protein RecF	4	4	11	42	38	22	24	10	27	246	146	181	287	109	49	15.322	13.8844	35.5401	44.1777	43.169	17.9631	33.1511	17.6534	32.6236	84.2178	66.6452	65.8814	66.0213	53.8291	39.4328	4.44601	4.36327	5.17608	5.39448	5.37072	4.51904	5.10582	4.52135	5.08965	6.07842	5.82646	5.81466	5.81759	5.60077
B5M07_00020	CP020694 (Chromosome)	3898	4518	+	lysine transporter LysE	1	0	0	18	10	19	6	4	9	56	36	78	64	29	12	3.83051	0	0	18.9333	11.3603	15.5136	8.28777	7.06137	10.8745	19.1715	16.4331	28.3909	14.7225	14.3215	9.657	2.72057	2.07679	2.042	3.95844	3.45792	3.76203	3.17435	3.04681	3.41699	3.98329	3.82471	4.39247	3.71742	3.68672
B5M07_00025	CP020694 (Chromosome)	4598	7012	+	DNA topoisomerase (ATP-hydrolyzing) subunit B	35	49	56	232	216	338	176	70	171	852	532	479	1704	709	437	134.068	170.084	180.931	244.029	245.382	275.979	243.108	123.574	206.616	291.681	242.844	174.349	391.987	350.136	351.676	7.30747	7.5405	7.60217	7.90765	7.91339	8.03628	7.90368	7.224	7.73588	8.09474	7.90266	7.56252	8.40989	8.28862
B5M07_00030	CP020694 (Chromosome)	7424	8113	-	hypothetical protein	5	2	1	30	16	29	11	5	40	52	55	54	195	68	29	19.1525	6.94222	3.23092	31.5555	18.1764	23.6787	15.1942	8.82671	48.3313	17.8021	25.1061	19.6552	44.8577	33.5814	23.3378	4.28189	3.49562	3.0905	4.77972	4.22871	4.4889	4.06112	3.60191	5.2269	4.20618	4.54959	4.30397	5.15751	4.84898
B5M07_00035	CP020694 (Chromosome)	8422	10224	-	hypothetical protein	46	15	37	272	234	263	99	60	161	582	345	333	1025	624	384	176.203	52.0667	119.544	286.103	265.83	214.741	136.748	105.921	194.533	199.247	157.483	121.207	235.79	308.159	309.024	7.46264	6.30873	7.07278	7.97293	7.89428	7.66867	7.20411	6.95112	7.56519	7.59043	7.34695	7.0816	7.76763	8.05334
B5M07_00040	CP020694 (Chromosome)	10786	11784	-	AAA family ATPase	42	52	28	265	258	291	178	81	178	654	409	429	1506	811	524	160.881	180.498	90.4656	278.74	293.095	237.603	245.871	142.993	215.074	223.896	186.698	156.15	346.439	400.508	421.689	7.47076	7.58545	6.92012	8.03357	8.08651	7.86649	7.902	7.35131	7.76329	7.80482	7.61793	7.43696	8.26497	8.42062
B5M07_00045	CP020694 (Chromosome)	12496	13461	-	hypothetical protein	1	0	1	16	17	6	11	5	8	28	35	58	58	21	28	3.83051	0	3.23092	16.8296	19.3124	4.89904	15.1942	8.82671	9.66626	9.58577	15.9766	21.1112	13.3423	10.3707	22.533	2.71941	2.07595	2.60751	3.83811	3.9753	2.72441	3.73262	3.23073	3.30792	3.29734	3.79471	4.08027	3.61791	3.37209
B5M07_00050	CP020694 (Chromosome)	13465	14727	-	hypothetical protein	14	9	8	9	8	24	10	5	4	48	46	27	70	16	14	53.6271	31.24	25.8473	9.46664	9.08821	19.5961	13.8129	8.82671	4.83313	16.4327	20.9978	9.82761	16.1028	7.90152	11.2665	5.17196	4.60158	4.41135	3.46988	3.43607	4.15759	3.81592	3.42522	2.94431	3.98474	4.23048	3.49037	3.96496	3.29656
B5M07_00055	CP020694 (Chromosome)	14741	15136	-	hypothetical protein	1	4	3	9	8	9	9	8	5	5	23	19	8	8	12	3.83051	13.8844	9.69275	9.46664	9.08821	7.34855	12.4317	14.1227	6.04141	1.71174	10.4989	6.91572	1.84032	3.95076	9.657	2.42683	3.39756	3.07513	3.08285	3.04382	2.85275	3.33641	3.4524	2.6841	1.69884	3.1913	2.79806	1.72203	2.31811
B5M07_00060	CP020694 (Chromosome)	16214	16522	-	hypothetical protein	0	0	0	1	0	0	5	0	1	3	4	7	0	0	1	0	0	0	1.05185	0	0	6.90647	0	1.20828	1.02705	1.8259	2.5479	0	0	0.80475	-0.33072	-0.365815	-0.391359	-0.166145	-0.756423	-0.823286	1.19657	-0.606664	-0.102669	-0.157518	0.196363	0.450844	-1.04088	-0.919578
B5M07_00065	CP020694 (Chromosome)	16501	17169	+	hypothetical protein	14	16	12	16	5	15	11	21	6	17	17	16	12	19	10	53.6271	55.5378	38.771	16.8296	5.68013	12.2476	15.1942	37.0722	7.24969	5.81993	7.76005	5.82377	2.76047	9.38305	8.0475	5.13487	5.17955	4.78857	3.9545	2.98174	3.64562	3.85206	4.7639	3.18116	2.95733	3.21666	2.95918	2.34809	3.39168
B5M07_00070	CP020694 (Chromosome)	17172	17840	+	hypothetical protein	7	18	33	7	2	6	22	18	6	16	24	36	58	17	6	26.8135	62.48	106.62	7.36294	2.27205	4.89904	30.3885	31.7762	7.24969	5.47758	10.9554	13.1035	13.3423	8.39536	4.8285	4.41994	5.34097	5.94107	3.21711	2.42781	2.87711	4.58429	4.62595	3.20962	2.93249	3.56281	3.73575	3.75334	3.31498
B5M07_00075	CP020694 (Chromosome)	18161	19198	-	ABC transporter substrate-binding protein	5	16	10	7	19	20	24	8	33	129	67	58	156	95	57	19.1525	55.5378	32.3092	7.36294	21.5845	16.3301	33.1511	14.1227	39.8733	44.163	30.5837	21.1112	35.8862	46.9153	45.8708	4.46394	5.49607	4.94547	3.62426	4.55345	4.28768	4.97564	4.17513	5.16473	5.27577	4.89616	4.5271	5.06038	5.33837
B5M07_00080	CP020694 (Chromosome)	19301	19978	+	hypothetical protein	4	15	5	12	16	17	17	26	23	125	50	62	125	46	51	15.322	52.0667	16.1546	12.6222	18.1764	13.8806	23.482	45.8989	27.7905	42.7936	22.8237	22.5671	28.7549	22.7169	41.0423	4.21374	5.37794	4.25086	4.00302	4.33603	4.08277	4.58197	5.25873	4.74802	5.1957	4.55254	4.54114	4.78473	4.54798
B5M07_00085	CP020694 (Chromosome)	20453	21388	-	transcriptional regulator	66	82	60	74	62	72	55	63	67	149	158	169	173	75	46	252.813	284.631	193.855	77.8368	70.4336	58.7884	75.9712	111.217	80.9549	51.01	72.1229	61.5136	39.7968	37.0384	37.0185	7.55265	7.6862	7.26256	6.30239	6.20105	6.01957	6.27785	6.67122	6.34254	5.8777	6.22436	6.06352	5.63723	5.57223
B5M07_00090	CP020694 (Chromosome)	21473	22657	+	formyl-CoA transferase	1	7	5	28	32	37	34	6	26	40	14	19	38	16	16	3.83051	24.2978	16.1546	29.4518	36.3528	30.2107	46.964	10.5921	31.4153	13.694	6.39063	6.91572	8.7415	7.90152	12.876	3.0256	4.3837	3.99812	4.60461	4.82504	4.63401	5.09649	3.6173	4.67014	3.83874	3.14657	3.20923	3.41322	3.33149
B5M07_00095	CP020694 (Chromosome)	22654	23607	+	hydroxymethylglutaryl-CoA lyase	0	2	6	16	6	11	5	9	5	16	9	3	22	2	6	0	6.94222	19.3855	16.8296	6.81616	8.98157	6.90647	15.8881	6.04141	5.47758	4.10826	1.09196	5.06087	0.98769	4.8285	1.57692	2.66357	3.62526	3.54917	2.67028	2.93039	2.67932	3.46627	2.5644	2.47858	2.23048	1.30136	2.40673	1.29174
B5M07_00100	CP020694 (Chromosome)	23633	24619	+	C4-dicarboxylate ABC transporter	5	4	3	65	71	94	51	29	39	8	4	17	30	14	3	19.1525	13.8844	9.69275	68.3702	80.6579	76.7516	70.446	51.1949	47.123	2.73879	1.8259	6.18775	6.90118	6.91383	2.41425	4.20718	3.91866	3.623	5.56635	5.75056	5.69866	5.59562	5.23739	5.15403	2.51569	2.29137	3.15206	3.23864	3.25568
B5M07_00105	CP020694 (Chromosome)	24632	25156	+	hypothetical protein	5	0	3	9	17	9	6	6	6	4	15	6	6	4	2	19.1525	0	9.69275	9.46664	19.3124	7.34855	8.28777	10.5921	7.24969	1.3694	6.84711	2.18391	1.38024	1.97538	1.6095	3.54245	1.44115	2.8885	2.92554	3.64629	2.69142	2.79054	3.01268	2.67117	1.3571	2.63244	1.67221	1.3339	1.61936
B5M07_00110	CP020694 (Chromosome)	25153	26439	+	C4-dicarboxylate ABC transporter	17	14	7	17	19	32	18	31	13	19	26	35	31	20	7	65.1186	48.5956	22.6164	17.8814	21.5845	26.1282	24.8633	54.7256	15.7077	6.50463	11.8683	12.7395	7.13122	9.8769	5.63325	5.4892	5.17427	4.39338	4.17159	4.35658	4.55143	4.49703	5.32291	4.04763	3.23443	3.77626	3.84164	3.30675	3.60786
B5M07_00115	CP020694 (Chromosome)	28227	29054	-	hypothetical protein	103	88	102	65	66	68	174	169	260	343	315	324	521	271	222	394.542	305.458	329.553	68.3702	74.9777	55.5224	240.345	298.343	314.153	117.426	143.789	117.931	119.851	133.832	178.655	8.29325	8.015	8.09749	6.49595	6.58329	6.30232	7.76046	7.99162	8.04815	7.01932	7.22477	7.02367	7.03971	7.15164
B5M07_00120	CP020694 (Chromosome)	29132	29842	+	hypothetical protein	44	54	69	14	11	8	10	32	18	36	62	20	53	39	27	168.542	187.44	222.933	14.7259	12.4963	6.53205	13.8129	56.491	21.7491	12.3246	28.3014	7.27971	12.1921	19.2599	21.7283	6.73283	6.85777	7.05894	4.18584	4.0409	3.492	4.13533	5.52996	4.55458	4.00488	4.81458	3.54296	3.9913	4.43118
B5M07_00125	CP020694 (Chromosome)	30063	31793	+	hypothetical protein	22	22	45	17	14	22	31	59	38	111	81	91	251	111	69	84.2711	76.3645	145.391	17.8814	15.9044	17.9631	42.8201	104.155	45.9147	38.0007	36.9744	33.1227	57.7399	54.8168	55.5278	6.14816	6.04569	6.74295	4.63126	4.53228	4.62968	5.45741	6.38433	5.52738	5.33602	5.30902	5.19954	5.76355	5.70913
B5M07_00130	CP020694 (Chromosome)	31797	32771	+	hypothetical protein	5	6	3	9	4	10	12	15	8	29	27	35	52	29	5	19.1525	20.8267	9.69275	9.46664	4.5441	8.16506	16.5755	26.4801	9.66626	9.92812	12.3248	12.7395	11.9621	14.3215	4.02375	3.98297	4.06929	3.38187	3.34552	2.75132	3.21085	3.87133	4.33967	3.36549	3.3836	3.5901	3.62251	3.56168	3.73625
B5M07_00135	CP020694 (Chromosome)	32768	34558	+	hypothetical protein	12	20	8	34	55	40	44	43	33	104	70	54	240	75	63	45.9661	69.4222	25.8473	35.7629	62.4814	32.6602	60.777	75.9097	39.8733	35.6043	31.9532	19.6552	55.2095	37.0384	50.6993	5.48823	5.90838	4.94473	5.23896	5.80706	5.14881	5.77735	6.00948	5.3473	5.23266	5.12566	4.65997	5.68074	5.27253
B5M07_00140	CP020694 (Chromosome)	34555	34818	+	hypothetical protein	2	4	1	3	11	10	1	6	11	10	17	6	31	17	6	7.66101	13.8844	3.23092	3.15555	12.4963	8.16506	1.38129	10.5921	13.2911	3.42349	7.76005	2.18391	7.13122	8.39536	4.8285	2.79636	3.32602	2.22776	2.11257	3.28411	2.88454	1.69774	3.10927	3.34312	2.12855	2.84217	1.79479	2.7657	2.9155
B5M07_00145	CP020694 (Chromosome)	34999	35157	+	hypothetical protein	0	0	0	0	0	0	0	0	0	0	0	0	0	0	0	0	0	0	0	0	0	0	0	0	0	0	0	0	0	0	0	0	0	0	0	0	0	0	0	0	0	0	0	0
B5M07_00150	CP020694 (Chromosome)	35516	41425	+	DNA helicase	82	45	39	520	444	416	403	215	617	1959	1693	1898	3806	2399	1875	314.101	156.2	126.006	546.962	504.396	339.666	556.662	379.549	745.51	670.661	772.81	690.845	875.53	1184.73	1508.91	8.51963	7.86123	7.67193	9.0812	8.99711	8.59485	9.09949	8.70681	9.40742	9.29531	9.446	9.3267	9.57996	9.90873
B5M07_00155	CP020694 (Chromosome)	42000	44189	-	isocitrate dehydrogenase (NADP(+))	63	51	91	176	178	306	122	163	136	432	258	258	627	222	124	241.322	177.027	294.013	185.125	202.213	249.851	168.518	287.751	164.326	147.895	117.77	93.9083	144.235	109.634	99.789	7.77137	7.44825	7.9824	7.49507	7.58721	7.81092	7.39766	7.96093	7.3717	7.26331	7.03281	6.8086	7.23763	6.96148
B5M07_00160	CP020694 (Chromosome)	44362	45018	-	hypothetical protein	2	0	1	14	10	4	3	6	6	46	13	31	51	8	22	7.66101	0	3.23092	14.7259	11.3603	3.26602	4.14388	10.5921	7.24969	15.748	5.93416	11.2836	11.732	3.95076	17.7045	2.92976	1.79997	2.37577	3.55009	3.29448	2.24036	2.44247	3.21894	2.88289	3.63449	2.70136	3.30112	3.34188	2.36122
B5M07_00165	CP020694 (Chromosome)	45104	46531	-	nodulation protein NodH	5	11	2	56	56	76	37	13	52	176	110	129	208	159	85	19.1525	38.1822	6.46183	58.9036	63.6175	62.0545	51.1079	22.9494	62.8307	60.2534	50.2121	46.9541	47.8482	78.5213	68.4038	4.72194	5.32919	3.98104	5.76479	5.84476	5.81975	5.61785	4.84503	5.83154	5.79036	5.601	5.53224	5.55168	6.06946
B5M07_00170	CP020694 (Chromosome)	46535	48232	-	glycosyl transferase	10	9	4	86	86	80	54	45	88	250	154	226	354	232	150	38.3051	31.24	12.9237	90.459	97.6983	65.3205	74.5899	79.4404	106.329	85.5872	70.297	82.2607	81.434	114.572	120.713	5.55476	5.37102	4.68798	6.39468	6.47523	6.05916	6.19461	6.25905	6.56438	6.3379	6.13405	6.29655	6.28619	6.64545
B5M07_00175	CP020694 (Chromosome)	48229	49239	-	glycosyl transferase family 2	14	12	0	36	28	27	29	9	18	49	26	27	168	47	43	53.6271	41.6533	0	37.8666	31.8087	22.0457	40.0576	15.8881	21.7491	16.7751	11.8683	9.82761	38.6466	23.2107	34.6043	5.36673	5.10404	2.71621	5.02382	4.84298	4.47526	5.08002	4.16916	4.46229	4.20637	3.88219	3.70868	5.05157	4.5264
B5M07_00180	CP020694 (Chromosome)	49284	50480	-	hypothetical protein	8	7	3	57	57	71	35	30	42	95	64	96	158	77	24	30.644	24.2978	9.69275	59.9554	64.7535	57.9719	48.3453	52.9603	50.7478	32.5231	29.2143	34.9426	36.3462	38.0261	19.314	5.02292	4.80949	4.08623	5.70004	5.78101	5.66571	5.47426	5.56714	5.52501	5.07259	4.96604	5.14482	5.18465	5.23047
B5M07_00185	CP020694 (Chromosome)	50473	51456	-	UDP-glucose 4-epimerase GalE	88	60	30	149	164	132	155	135	198	305	289	385	442	339	325	337.084	208.267	96.9275	156.726	186.308	107.779	214.101	238.321	239.24	104.416	131.921	140.134	101.677	167.413	261.544	8.12767	7.61528	6.84623	7.32142	7.50015	6.94355	7.64555	7.75844	7.763	6.91109	7.14542	7.20669	6.88453	7.3893
B5M07_00190	CP020694 (Chromosome)	51474	52367	-	UTP--glucose-1-phosphate uridylyltransferase	116	88	86	317	309	320	308	232	408	608	549	724	924	819	668	444.339	305.458	277.859	333.436	351.032	261.282	425.439	409.559	492.979	208.148	250.604	263.526	212.556	404.459	537.573	8.67997	8.28968	8.19306	8.37984	8.43326	8.12963	8.63488	8.59461	8.79174	7.90172	8.08719	8.13808	7.92229	8.58178
B5M07_00195	CP020694 (Chromosome)	52429	53706	-	glycosyl transferase family 2	0	2	1	12	10	17	1	10	1	177	100	94	150	60	31	0	6.94222	3.23092	12.6222	11.3603	13.8806	1.38129	17.6534	1.20828	60.5958	45.6474	34.2146	34.5059	29.6307	24.9473	2.3613	3.24675	2.80788	3.69988	3.60183	3.7906	2.24866	4.02084	2.16432	5.34664	5.03256	4.72187	4.73306	4.56653
B5M07_00200	CP020694 (Chromosome)	53703	54503	-	3-deoxy-manno-octulosonate cytidylyltransferase	7	3	0	19	18	18	5	12	17	66	61	62	111	50	36	26.8135	10.4133	0	19.9851	20.4485	14.6971	6.90647	21.1841	20.5408	22.595	27.8449	22.5671	25.5344	24.6922	28.971	4.53818	3.7036	2.51236	4.26541	4.28771	3.96821	3.3296	4.31996	4.29189	4.39125	4.60412	4.38987	4.51683	4.48051
B5M07_00205	CP020694 (Chromosome)	54503	55300	-	3'(2'),5'-bisphosphate nucleotidase	5	5	0	12	10	18	19	10	7	106	85	61	157	71	23	19.1525	17.3556	0	12.6222	11.3603	14.6971	26.2446	17.6534	8.45797	36.289	38.8003	22.2031	36.1162	35.063	18.5093	4.23499	4.14588	2.53623	3.84354	3.75	3.98268	4.55016	4.1596	3.49912	4.89569	4.96526	4.38725	4.89186	4.85783
B5M07_00210	CP020694 (Chromosome)	55417	56241	+	ABC transporter permease	103	97	109	94	76	71	114	119	151	280	356	427	425	296	188	394.542	336.698	352.17	98.8738	86.338	57.9719	157.468	210.076	182.451	95.8577	162.505	155.422	97.7668	146.178	151.293	8.27435	8.10173	8.15096	6.82782	6.69576	6.32065	7.2977	7.59823	7.45059	6.79544	7.33032	7.28418	6.81463	7.221
B5M07_00215	CP020694 (Chromosome)	56238	56846	+	hypothetical protein	21	14	13	14	11	16	15	20	17	61	32	69	72	36	17	80.4406	48.5956	42.0019	14.7259	12.4963	13.0641	20.7194	35.3068	20.5408	20.8833	14.6072	25.115	16.5628	17.7784	13.6808	5.8054	5.26468	5.11425	4.09177	3.94525	3.97861	4.41559	4.94591	4.40684	4.42109	4.07583	4.60586	4.19322	4.26397
B5M07_00220	CP020694 (Chromosome)	56898	57500	-	alkylated DNA repair dioxygenase	7	0	0	5	4	10	9	14	8	5	1	13	10	7	1	26.8135	0	0	5.25925	4.5441	8.16506	12.4317	24.7148	9.66626	1.71174	0.456474	4.73181	2.30039	3.45691	0.80475	3.83224	1.27778	1.24786	2.29595	2.17076	2.70839	3.10472	3.82075	2.85891	1.3877	0.762615	2.20867	1.59231	1.93715
B5M07_00225	CP020694 (Chromosome)	57708	59627	+	molecular chaperone DnaK	51	93	50	166	193	500	89	96	136	1220	1794	3088	1049	431	353	195.356	322.813	161.546	174.607	219.253	408.253	122.935	169.473	164.326	417.666	818.914	1123.99	241.311	212.847	284.077	7.75622	8.2692	7.56822	7.64139	7.87027	8.51864	7.30069	7.61287	7.58155	8.54329	9.27917	9.6334	7.96779	7.83977
B5M07_00230	CP020694 (Chromosome)	59708	60856	+	molecular chaperone DnaJ	25	28	26	44	29	63	13	50	48	251	277	569	221	67	100	95.7626	97.1911	84.0038	46.2814	32.9448	51.4399	17.9568	88.2671	57.9975	85.9296	126.443	207.108	50.8387	33.0876	80.475	6.42823	6.44448	6.2935	5.69274	5.36747	5.79645	4.83906	6.34733	5.91728	6.32177	6.73228	7.2729	5.78308	5.36482
B5M07_00235	CP020694 (Chromosome)	60973	61734	+	hypothetical protein	0	1	2	1	1	0	0	0	1	17	7	20	9	4	6	0	3.47111	6.46183	1.05185	1.13603	0	0	0	1.20828	5.81993	3.19532	7.27971	2.07035	1.97538	4.8285	0.581782	1.32922	1.816	0.676066	0.71696	0.0588514	0.22306	0.301542	0.749948	1.90427	1.3781	2.106	1.04533	1.0119
B5M07_00240	CP020694 (Chromosome)	61747	63306	-	cell envelope biogenesis protein OmpA	37	35	19	44	47	40	41	75	70	93	54	84	132	49	57	141.729	121.489	61.3874	46.2814	53.3932	32.6602	56.6331	132.401	84.5797	31.8384	24.6496	30.5748	30.3652	24.1984	45.8708	6.74948	6.58333	5.86605	5.5818	5.72626	5.2379	5.78617	6.68402	6.20432	5.20968	4.96753	5.17067	5.16284	4.95094
B5M07_00245	CP020694 (Chromosome)	63326	64297	-	hypothetical protein	210	107	167	187	115	142	223	276	238	169	192	222	386	193	200	804.406	371.409	539.563	196.696	130.643	115.944	308.029	487.234	287.571	57.857	87.643	80.8048	88.7952	95.3121	160.95	9.13794	8.28061	8.6906	7.60803	7.19153	7.07242	8.08101	8.57953	8.00765	6.40989	6.79874	6.72068	6.81028	6.87977
B5M07_00250	CP020694 (Chromosome)	64400	67102	-	preprotein translocase subunit SecA	25	45	40	122	134	244	68	46	76	553	483	775	863	299	242	95.7626	156.2	129.237	128.326	152.228	199.227	93.9281	81.2057	91.8294	189.319	220.477	282.089	198.524	147.66	194.75	6.77891	7.26717	7.07428	7.06577	7.24093	7.52228	6.75404	6.61387	6.73139	7.46884	7.63012	7.89466	7.51905	7.20948
B5M07_00255	CP020694 (Chromosome)	67276	68124	+	peptidylprolyl isomerase	0	4	19	27	17	27	18	15	14	192	141	233	164	80	45	0	13.8844	61.3874	28.3999	19.3124	22.0457	24.8633	26.4801	16.9159	65.731	64.3628	84.8086	37.7265	39.5076	36.2138	3.04391	4.23176	5.6336	4.8516	4.47992	4.60292	4.72207	4.78418	4.35846	5.72682	5.70336	6.0036	5.14082	5.18758
B5M07_00260	CP020694 (Chromosome)	68128	69354	+	bifunctional ornithine acetyltransferase/N-acetylglutamate synthase	7	11	11	26	37	38	23	9	15	164	140	162	139	105	95	26.8135	38.1822	35.5401	27.3481	42.033	31.0272	31.7698	15.8881	18.1242	56.1452	63.9063	58.9657	31.9755	51.8537	76.4513	4.91411	5.24535	5.17574	4.91675	5.34312	5.03891	5.06378	4.43228	4.53543	5.6449	5.78098	5.69638	5.06712	5.56109
B5M07_00265	CP020694 (Chromosome)	69359	69757	+	NTP pyrophosphohydrolase	0	1	0	1	0	1	0	5	0	9	3	18	8	0	0	0	3.47111	0	1.05185	0	0.816506	0	8.82671	0	3.08114	1.36942	6.55174	1.84032	0	0	0.0822286	0.846519	0.0132887	0.226627	-0.360424	0.0990218	-0.305646	1.82991	-0.343089	0.992657	0.374221	1.67371	0.590716	-0.590425
B5M07_00270	CP020694 (Chromosome)	70078	70995	+	diacylglycerol O-acyltransferase	7	11	5	71	148	184	11	7	9	29	19	25	32	6	25	26.8135	38.1822	16.1546	74.6813	168.132	150.237	15.1942	12.3574	10.8745	9.92812	8.673	9.09964	7.36126	2.96307	20.1188	4.61962	4.97999	4.14692	5.73134	6.65177	6.52508	4.07639	3.8946	3.77043	3.66263	3.54505	3.58406	3.38772	2.71122
B5M07_00275	CP020694 (Chromosome)	70992	71798	+	phosphodiesterase	1	5	0	50	114	130	25	3	1	7	8	12	3	2	2	3.83051	17.3556	0	52.5925	129.507	106.146	34.5324	5.29603	1.20828	2.39644	3.65179	4.36783	0.690118	0.98769	1.6095	2.48817	3.70847	1.73902	4.99775	6.05056	5.81977	4.51143	2.63715	1.70304	1.91782	2.27174	2.42025	1.08404	1.40121
B5M07_00280	CP020694 (Chromosome)	71808	74276	-	translation initiation factor IF-2	453	422	483	952	966	1792	559	484	735	1661	1226	1457	2087	862	608	1735.22	1464.81	1560.53	1001.36	1097.4	1463.18	772.144	854.426	888.087	568.641	559.637	530.327	480.092	425.694	489.288	10.4865	10.3028	10.3714	9.8975	9.99427	10.3023	9.62642	9.73134	9.77162	9.31457	9.29859	9.24474	9.14593	9.02837
B5M07_00285	CP020694 (Chromosome)	74286	74906	-	hypothetical protein	113	128	84	153	187	321	93	131	162	196	137	208	246	88	48	432.847	444.302	271.397	160.933	212.437	262.098	128.46	231.26	195.742	67.1004	62.5369	75.709	56.5897	43.4583	38.628	8.33332	8.36307	7.821	7.26726	7.56053	7.78688	7.034	7.65057	7.47335	6.38558	6.31866	6.5029	6.22207	5.98001
B5M07_00290	CP020694 (Chromosome)	74927	76555	-	transcription termination/antitermination protein NusA	80	89	89	415	437	772	162	74	149	372	328	404	596	171	128	306.44	308.929	287.552	436.517	496.443	630.343	223.77	130.635	180.034	127.354	149.723	147.05	137.104	84.4475	103.008	8.11331	8.12215	8.04639	8.496	8.63623	8.8999	7.78457	7.24052	7.56086	7.2126	7.3738	7.35561	7.28546	6.81985
B5M07_00295	CP020694 (Chromosome)	76555	77133	-	ribosome maturation factor RimP	4	16	33	68	41	92	16	7	13	113	64	71	211	43	20	15.322	55.5378	106.62	71.5257	46.5771	75.1185	22.1007	12.3574	15.7077	38.6854	29.2143	25.843	48.5383	21.2353	16.095	4.37878	5.5729	6.27632	5.85508	5.40095	5.90946	4.66161	4.15852	4.34736	5.2118	4.92722	4.80517	5.4478	4.61495
B5M07_00300	CP020694 (Chromosome)	77286	78152	-	peptide ABC transporter substrate-binding protein	9	0	5	20	9	8	14	15	14	102	72	78	172	70	33	34.4745	0	16.1546	21.037	10.2242	6.53205	19.3381	26.4801	16.9159	34.9196	32.8661	28.3909	39.5668	34.5691	26.5568	4.85351	2.65645	4.1352	4.37628	3.70963	3.32681	4.29437	4.60204	4.1661	4.89639	4.83207	4.68118	5.0291	4.88448
B5M07_00305	CP020694 (Chromosome)	78149	79117	-	prolyl aminopeptidase	14	9	9	27	28	41	38	27	27	140	108	138	226	99	45	53.6271	31.24	29.0782	28.3999	31.8087	33.4767	52.4892	47.6642	32.6236	47.9288	49.2992	50.23	51.9889	48.8906	36.2138	5.62111	5.09534	5.02808	4.99325	5.1032	5.15218	5.60584	5.50625	5.12813	5.51455	5.54341	5.56296	5.59901	5.53474
B5M07_00310	CP020694 (Chromosome)	79166	79936	+	bifunctional 3-demethylubiquinol 3-O-methyltransferase/2-polyprenyl-6-hydroxyphenol methylase	3	9	8	10	31	65	14	10	17	41	41	80	50	24	20	11.4915	31.24	25.8473	10.5185	35.2168	53.0729	19.3381	17.6534	20.5408	14.0363	18.7154	29.1188	11.502	11.8523	16.095	3.84835	4.74439	4.55836	3.72053	4.88668	5.32423	4.28265	4.19666	4.34122	3.9706	4.24992	4.69619	3.78124	3.81458
B5M07_00315	CP020694 (Chromosome)	79911	80351	-	MarR family transcriptional regulator	3	0	5	7	8	2	2	4	1	23	17	22	32	12	10	11.4915	0	16.1546	7.36294	9.08821	1.63301	2.76259	7.06137	1.20828	7.87402	7.76005	8.00768	7.36126	5.92614	8.0475	3.10277	1.56843	3.44671	2.75468	2.94633	1.64803	2.00894	2.71011	1.57382	2.827	2.81141	2.84251	2.76533	2.56464
B5M07_00320	CP020694 (Chromosome)	80363	81193	-	amidohydrolase	9	9	5	21	40	61	24	24	38	59	62	107	79	45	37	34.4745	31.24	16.1546	22.0888	45.441	49.8069	33.1511	42.3682	45.9147	20.1986	28.3014	38.9465	18.1731	22.223	29.7758	5.04582	4.95099	4.35866	4.61344	5.33394	5.43141	5.01122	5.25872	5.34434	4.52168	4.85327	5.17769	4.41908	4.6153
B5M07_00325	CP020694 (Chromosome)	81190	81450	-	glutaredoxin 3	0	1	1	1	6	3	0	0	2	11	2	6	6	2	9	0	3.47111	3.23092	1.05185	6.81616	2.44952	0	0	2.41656	3.76584	0.912948	2.18391	1.38024	0.98769	7.24275	0.55068	1.29576	1.25666	0.647736	1.96911	1.13458	0.18828	0.266793	1.11705	1.49432	0.519821	1.05918	0.736511	0.564597
B5M07_00330	CP020694 (Chromosome)	81488	82219	-	amidophosphoribosyltransferase	0	0	0	0	0	0	0	2	1	1	0	0	4	3	0	0	0	0	0	0	0	0	3.53068	1.20828	0.342349	0	0	0.920158	1.48153	0	-0.92144	-0.948548	-0.968278	-1.27705	-1.25587	-1.34674	-1.20208	-0.0732378	-0.69284	-1.12969	-1.41537	-1.43574	-0.754697	-0.520802
B5M07_00335	CP020694 (Chromosome)	82234	83052	+	SAM-dependent methyltransferase	4	2	3	5	4	5	1	3	6	14	9	7	26	5	4	15.322	6.94222	9.69275	5.25925	4.5441	4.08253	1.38129	5.29603	7.24969	4.79288	4.10826	2.5479	5.98103	2.46922	3.219	3.24676	2.53956	2.82921	2.34338	2.22383	2.13558	1.51001	2.34496	2.62006	2.26607	2.13543	1.75489	2.46506	1.74259
B5M07_00340	CP020694 (Chromosome)	83104	84177	+	ferrochelatase	20	28	59	62	58	425	150	22	28	55	56	50	109	35	10	76.6101	97.1911	190.624	65.2146	65.8895	347.015	207.194	38.8375	33.8319	18.8292	25.5625	18.1993	25.0743	17.2846	8.0475	6.0833	6.33635	7.07783	5.92271	5.93326	7.7684	7.17984	5.39781	5.26088	4.69726	4.98483	4.66677	4.96333	4.62378
B5M07_00345	CP020694 (Chromosome)	84282	84464	-	hypothetical protein	5	15	1	15	15	21	19	12	32	205	63	33	318	39	28	19.1525	52.0667	3.23092	15.7777	17.0404	17.1466	26.2446	21.1841	38.665	70.1815	28.7578	12.0115	73.1525	19.2599	22.533	4.38577	5.36759	3.23012	4.18764	4.26026	4.26296	4.67776	4.46953	5.07282	5.71724	4.77204	3.92323	5.76363	4.37214
B5M07_00350	CP020694 (Chromosome)	84606	85217	-	L,D-transpeptidase	4	51	49	79	90	118	31	21	30	208	146	140	481	213	127	15.322	177.027	158.315	83.0961	102.242	96.3477	42.8201	37.0722	36.2485	71.2086	66.6452	50.958	110.649	105.189	102.203	4.84673	7.12161	7.00072	6.32251	6.53889	6.47704	5.66094	5.52772	5.50165	6.16373	6.09607	5.82578	6.62436	6.57015
B5M07_00355	CP020694 (Chromosome)	85385	85882	+	hypothetical protein	4	3	9	17	11	23	4	4	6	98	23	50	193	71	34	15.322	10.4133	29.0782	17.8814	12.4963	18.7796	5.52518	7.06137	7.24969	33.5502	10.4989	18.1993	44.3976	35.063	27.3615	3.99358	3.67425	4.60173	4.13436	3.79599	4.18294	3.13601	3.33464	3.33111	4.78067	3.62578	4.15295	5.0808	4.82544
B5M07_00360	CP020694 (Chromosome)	85950	86447	-	hypothetical protein	24	24	17	57	43	68	25	14	41	99	63	49	121	69	46	91.9321	83.3067	54.9256	59.9554	48.8491	55.5224	34.5324	24.7148	49.5396	33.8925	28.7578	17.8353	27.8348	34.0753	37.0185	6.19417	6.09071	5.65712	5.75438	5.54217	5.67509	5.19422	4.87801	5.55641	5.17259	5.01104	4.55844	4.97756	5.17843
B5M07_00365	CP020694 (Chromosome)	86562	87785	-	RNA methyltransferase	1	1	2	23	22	49	10	13	20	69	49	55	119	34	15	3.83051	3.47111	6.46183	24.1925	24.9926	40.0088	13.8129	22.9494	24.1656	23.6221	22.3672	20.0192	27.3747	16.7907	12.0713	3.09603	3.03034	3.34376	4.44124	4.47353	4.96674	3.89798	4.3834	4.43895	4.42228	4.36602	4.25474	4.5748	4.08014
B5M07_00370	CP020694 (Chromosome)	87823	89655	-	multidrug ABC transporter ATP-binding protein	18	20	22	69	80	113	81	75	127	146	135	202	189	65	65	68.9491	69.4222	71.0802	72.5776	90.8821	92.2652	111.885	132.401	153.452	49.9829	61.624	73.5251	43.4775	32.0999	52.3088	6.13193	6.1386	6.16213	6.18299	6.415	6.43122	6.63295	6.81124	6.97159	5.80656	6.01637	6.1963	5.66886	5.38198
B5M07_00375	CP020694 (Chromosome)	89652	91490	-	multidrug ABC transporter ATP-binding protein	38	32	29	77	65	79	57	86	106	116	99	94	214	88	40	145.559	111.076	93.6966	80.9924	73.8417	64.504	78.7338	151.819	128.078	39.7125	45.1909	34.2146	49.2284	43.4583	32.19	6.88996	6.60262	6.42498	6.27705	6.18167	6.04361	6.2475	6.94177	6.76018	5.56052	5.68718	5.41807	5.77076	5.64911
B5M07_00380	CP020694 (Chromosome)	91656	92816	-	CCA tRNA nucleotidyltransferase	1	5	3	1	7	11	9	7	12	61	49	88	92	34	24	3.83051	17.3556	9.69275	1.05185	7.95218	8.98157	12.4317	12.3574	14.4994	20.8833	22.3672	32.0307	21.1636	16.7907	19.314	2.88254	3.95539	3.45005	2.05422	3.2541	3.35348	3.65377	3.6488	3.79908	4.16938	4.23836	4.6154	4.18449	3.94716
B5M07_00385	CP020694 (Chromosome)	92813	93409	-	coenzyme A pyrophosphatase	0	0	0	6	1	2	5	0	2	12	17	29	16	11	3	0	0	0	6.31109	1.13603	1.63301	6.90647	0	2.41656	4.10819	7.76005	10.5556	3.68063	5.43229	2.41425	0.940584	0.907229	0.882552	2.19392	1.02593	1.17855	2.2603	0.664781	1.43658	1.84459	2.41639	2.72003	1.75365	2.08425
B5M07_00390	CP020694 (Chromosome)	93411	94385	-	molecular chaperone Hsp33	9	6	13	12	17	26	12	8	15	65	66	204	77	22	37	34.4745	20.8267	42.0019	12.6222	19.3124	21.2292	16.5755	14.1227	18.1242	22.2527	30.1273	74.253	17.713	10.8646	29.7758	4.90967	4.42679	5.1155	3.95502	4.3493	4.44009	4.2069	4.06675	4.28921	4.48612	4.79237	5.75168	4.26065	3.80767
B5M07_00395	CP020694 (Chromosome)	94462	94899	+	NUDIX hydrolase	0	0	2	0	3	0	0	1	3	4	6	0	1	4	0	0	0	6.46183	0	3.40808	0	0	1.76534	3.62485	1.3694	2.73884	0	0.230039	1.97538	0	-0.10338	-0.141541	1.19623	-0.560824	0.829447	-0.623669	-0.493139	0.311076	0.873527	0.221444	0.721463	-0.810281	-0.598194	0.466269
B5M07_00400	CP020694 (Chromosome)	94896	96164	-	fused response regulator/phosphatase	11	6	1	8	4	1	8	14	16	24	7	28	18	9	5	42.1356	20.8267	3.23092	8.41479	4.5441	0.816506	11.0504	24.7148	19.3325	8.21637	3.19532	10.1916	4.14071	4.4446	4.02375	4.64268	3.88706	2.41256	3.04879	2.52836	1.53761	3.30083	4.10842	3.86379	3.02783	2.21287	3.23556	2.40475	2.48012
B5M07_00405	CP020694 (Chromosome)	96254	97507	-	threonine dehydratase	1	1	2	2	10	16	6	11	10	39	20	39	59	25	11	3.83051	3.47111	6.46183	2.1037	11.3603	13.0641	8.28777	19.4188	12.0828	13.3516	9.12948	14.1954	13.5723	12.3461	8.85225	2.64894	2.58478	2.94561	2.13444	3.40599	3.54293	3.12011	3.92006	3.46358	3.57039	3.20387	3.63082	3.58817	3.49173
B5M07_00410	CP020694 (Chromosome)	97611	98837	+	argininosuccinate synthase	5	10	12	68	51	107	38	16	20	358	196	158	486	227	84	19.1525	34.7111	38.771	71.5257	57.9373	87.3661	52.4892	28.2455	24.1656	122.561	89.4689	57.5097	111.799	112.103	67.599	4.86769	5.36451	5.46533	6.07103	5.85434	6.28125	5.75463	5.16142	5.01247	6.64551	6.30746	5.84678	6.54653	6.54851
B5M07_00415	CP020694 (Chromosome)	98983	99396	-	hypothetical protein	17	7	4	10	54	54	21	11	20	24	24	34	32	24	18	65.1186	24.2978	12.9237	10.5185	61.3454	44.0913	29.0072	19.4188	24.1656	8.21637	10.9554	12.3755	7.36126	11.8523	14.4855	5.50449	4.48057	3.91115	3.69886	5.46966	5.11569	4.6708	4.26968	4.48659	3.45771	3.72114	3.83287	3.35529	3.79474
B5M07_00420	CP020694 (Chromosome)	99464	100162	-	sulfotransferase family protein	4	2	0	0	0	2	2	3	2	30	15	18	44	13	1	15.322	6.94222	0	0	0	1.63301	2.76259	5.29603	2.41656	10.2705	6.84711	6.55174	10.1217	6.41998	0.80475	3.09407	2.35438	1.09002	0.63242	0.664209	1.32286	1.68544	2.17393	1.5914	2.8463	2.44536	2.40728	2.83721	2.38322
B5M07_00425	CP020694 (Chromosome)	100318	100983	+	peptide-methionine (S)-S-oxide reductase	2	4	2	12	15	17	5	2	6	12	14	5	7	7	2	7.66101	13.8844	6.46183	12.6222	17.0404	13.8806	6.90647	3.53068	7.24969	4.10819	6.39063	1.81993	1.61028	3.45691	1.6095	2.74944	3.28778	2.62135	3.26371	3.56573	3.36642	2.68907	2.17415	2.7339	2.23714	2.62724	1.62159	1.51359	2.1023
B5M07_00430	CP020694 (Chromosome)	101000	101875	-	ribokinase	5	2	3	35	22	53	12	9	50	95	40	82	154	49	45	19.1525	6.94222	9.69275	36.8147	24.9926	43.2748	16.5755	15.8881	60.4141	32.5231	18.259	29.8468	35.4261	24.1984	36.2138	4.39757	3.63762	3.84649	5.03095	4.63904	5.20105	4.24843	4.21456	5.5532	4.90696	4.33046	4.81884	4.99593	4.60692
B5M07_00435	CP020694 (Chromosome)	101875	104133	-	NADP-dependent malic enzyme	23	15	42	76	78	231	99	53	90	222	130	170	352	192	116	88.1016	52.0667	135.698	79.9405	88.61	188.613	136.748	93.5631	108.745	76.0015	59.3416	61.8775	80.9739	94.8182	93.351	6.47602	5.96541	6.92164	6.37654	6.48133	7.2787	6.93295	6.53697	6.69253	6.32458	6.07732	6.1184	6.38889	6.55092
B5M07_00440	CP020694 (Chromosome)	104328	106949	+	DNA mismatch repair protein MutS	0	3	6	10	11	4	4	10	12	52	30	21	90	37	20	0	10.4133	19.3855	10.5185	12.4963	3.26602	5.52518	17.6534	14.4994	17.8021	13.6942	7.6437	20.7035	18.2723	16.095	2.19755	3.42558	3.98904	3.42789	3.58851	2.47772	2.8925	3.91642	3.73028	3.94369	3.68067	3.12939	4.09963	3.96798
B5M07_00445	CP020694 (Chromosome)	106979	107542	-	nucleotide exchange factor GrpE	1	2	0	7	9	35	6	0	3	72	31	77	92	41	13	3.83051	6.94222	0	7.36294	10.2242	28.5777	8.28777	0	3.62485	24.6491	14.1507	28.0269	21.1636	20.2476	10.4618	2.67858	3.02894	1.9887	3.03798	3.33343	4.3727	3.14493	1.69147	2.4955	4.22589	3.65288	4.36164	4.06827	4.01702
B5M07_00450	CP020694 (Chromosome)	107552	108616	-	heat-inducible transcriptional repressor HrcA	1	0	0	11	10	6	2	1	6	140	91	83	244	94	63	3.83051	0	0	11.5703	11.3603	4.89904	2.76259	1.76534	7.24969	47.9288	41.5391	30.2108	56.1296	46.4214	50.6993	2.86943	2.24476	2.20766	3.5841	3.5673	2.83247	2.50457	2.3496	3.16926	5.06663	4.90764	4.56487	5.24336	5.02888
B5M07_00455	CP020694 (Chromosome)	108727	109440	+	ribonuclease PH	0	2	10	15	17	20	4	8	8	73	31	29	117	19	16	0	6.94222	32.3092	15.7777	19.3124	16.3301	5.52518	14.1227	9.66626	24.9915	14.1507	10.5556	26.9146	9.38305	12.876	2.31828	3.20887	4.57867	3.88159	4.0807	3.91697	2.97352	3.7722	3.42486	4.35457	3.77828	3.49621	4.43367	3.38799
B5M07_00460	CP020694 (Chromosome)	109437	110048	+	non-canonical purine NTP pyrophosphatase, RdgB/HAM1 family	0	0	2	2	3	3	4	0	3	18	9	5	22	10	0	0	0	6.46183	2.1037	3.40808	2.44952	5.52518	0	3.62485	6.16228	4.10826	1.81993	5.06087	4.93845	0	0.832511	0.789429	2.02792	1.25745	1.5923	1.35441	1.97663	0.558594	1.63773	2.12829	1.76307	1.13648	1.95549	1.9207
B5M07_00465	CP020694 (Chromosome)	110041	111195	+	coproporphyrinogen III oxidase	5	2	6	35	26	34	16	11	28	110	50	65	121	36	32	19.1525	6.94222	19.3855	36.8147	29.5367	27.7612	22.1007	19.4188	33.8319	37.6584	22.8237	23.6591	27.8348	17.7784	25.752	4.374	3.61236	4.38198	5.01123	4.78565	4.72429	4.49856	4.37671	4.92332	5.03959	4.52897	4.56472	4.72879	4.285
B5M07_00470	CP020694 (Chromosome)	111192	112091	-	chromosome partitioning protein ParB	15	3	13	135	109	339	110	57	88	188	137	136	239	161	109	57.4576	10.4133	42.0019	142	123.827	276.796	151.942	100.625	106.329	64.3616	62.5369	49.502	54.9794	79.509	87.7178	5.98852	4.64218	5.69159	6.91789	6.77126	7.65121	6.98992	6.55142	6.61002	6.09271	6.0639	5.83084	5.93425	6.30842
B5M07_00475	CP020694 (Chromosome)	112104	112901	-	chromosome partitioning protein ParA	12	19	5	130	161	451	148	56	102	246	144	178	347	142	122	45.9661	65.9511	16.1546	136.74	182.9	368.244	204.432	98.8592	123.245	84.2178	65.7322	64.7894	79.8237	70.126	98.1795	5.8636	6.20008	5.0193	6.94283	7.25428	8.02867	7.37457	6.60309	6.83289	6.43859	6.18848	6.1738	6.38383	6.25331
B5M07_00480	CP020694 (Chromosome)	112894	113499	-	16S rRNA (guanine(527)-N(7))-methyltransferase RsmG	17	4	4	70	62	183	88	45	46	152	97	125	252	125	113	65.1186	13.8844	12.9237	73.6294	70.4336	149.421	121.554	79.4404	55.581	52.037	44.278	45.4982	57.9699	61.7306	90.9368	5.97382	4.62543	4.56783	6.10368	6.05745	6.86196	6.63499	6.1814	5.81482	5.74741	5.58522	5.6121	5.85749	5.92198
B5M07_00485	CP020694 (Chromosome)	113496	115358	-	tRNA uridine-5-carboxymethylaminomethyl(34) synthesis enzyme MnmG	36	47	59	314	278	809	577	124	299	526	411	432	898	472	298	137.898	163.142	190.624	330.281	315.815	660.553	797.007	218.902	361.276	180.076	187.611	157.242	206.575	233.095	239.816	7.38428	7.54642	7.7004	8.26648	8.21922	9.01517	9.22322	7.83924	8.36145	7.64059	7.68198	7.50531	7.77943	7.90318
B5M07_00490	CP020694 (Chromosome)	115372	116658	-	tRNA uridine-5-carboxymethylaminomethyl(34) synthesis GTPase MnmE	5	3	1	14	43	102	15	12	15	144	126	127	213	40	23	19.1525	10.4133	3.23092	14.7259	48.8491	83.2836	20.7194	21.1841	18.1242	49.2982	57.5157	46.2262	48.9984	19.7538	18.5093	4.43251	3.9426	3.29393	4.16739	5.35478	5.9336	4.48834	4.51143	4.36079	5.37029	5.53415	5.30191	5.36464	4.43663
B5M07_00495	CP020694 (Chromosome)	116691	117962	-	transcription termination factor Rho	29	49	67	345	325	468	107	34	101	348	269	201	787	161	95	111.085	170.084	216.471	362.888	369.209	382.125	147.799	60.0216	122.036	119.137	122.791	73.1611	181.041	79.509	76.4513	6.91905	7.35068	7.60374	8.16427	8.18308	8.22135	7.20606	6.32634	7.01028	6.9851	7.01591	6.503	7.41774	6.58375
B5M07_00500	CP020694 (Chromosome)	118087	118536	-	hypothetical protein	0	3	2	4	3	3	1	1	0	14	8	17	28	11	7	0	10.4133	6.46183	4.2074	3.40808	2.44952	1.38129	1.76534	0	4.79288	3.65179	6.18775	6.4411	5.43229	5.63325	1.14458	2.6899	2.27703	1.97942	1.81682	1.5752	1.29418	1.43732	0.701364	2.10101	1.86851	2.32993	2.37201	2.20782
B5M07_00505	CP020694 (Chromosome)	118943	119542	+	septum formation protein Maf	0	7	1	1	1	1	1	1	11	5	0	8	22	2	7	0	24.2978	3.23092	1.05185	1.13603	0.816506	1.38129	1.76534	13.2911	1.71174	0	2.91188	5.06087	0.98769	5.63325	0.760099	3.39738	1.48263	0.817144	0.862253	0.670469	0.977609	1.12347	2.85882	1.03546	-0.0670774	1.4548	1.95693	0.702428
B5M07_00510	CP020694 (Chromosome)	119539	120372	+	shikimate dehydrogenase	1	1	1	7	2	3	3	4	5	29	17	23	44	21	13	3.83051	3.47111	3.23092	7.36294	2.27205	2.44952	4.14388	7.06137	6.04141	9.92812	7.76005	8.37167	10.1217	10.3707	10.4618	2.31632	2.25461	2.20971	2.77084	1.90047	1.91572	2.30556	2.72796	2.59896	3.06144	2.82594	2.89835	3.08281	3.0999
B5M07_00515	CP020694 (Chromosome)	120372	120962	+	dephospho-CoA kinase	0	0	7	5	4	6	0	0	6	19	27	17	26	18	14	0	0	22.6164	5.25925	4.5441	4.89904	0	0	7.24969	6.50463	12.3248	6.18775	5.98103	8.88921	11.2665	1.4525	1.41173	3.71233	2.36852	2.24821	2.30866	1.01351	1.12079	2.64782	2.5652	3.18236	2.5186	2.48908	2.85791
B5M07_00525	CP020694 (Chromosome)	121275	121640	+	transposase	0	0	0	0	0	0	0	0	0	0	0	0	0	0	0	0	0	0	0	0	0	0	0	0	0	0	0	0	0	0	0	0	0	0	0	0	0	0	0	0	0	0	0	0
B5M07_00530	CP020694 (Chromosome)	121637	121984	+	transposase	0	0	0	0	0	0	0	0	0	0	0	0	0	0	0	0	0	0	0	0	0	0	0	0	0	0	0	0	0	0	0	0	0	0	0	0	0	0	0	0	0	0	0	0
B5M07_00535	CP020694 (Chromosome)	122054	123757	+	transposase	0	0	0	0	0	0	0	0	0	0	0	0	0	0	0	0	0	0	0	0	0	0	0	0	0	0	0	0	0	0	0	0	0	0	0	0	0	0	0	0	0	0	0	0
B5M07_00540	CP020694 (Chromosome)	123790	124119	+	QacE family quaternary ammonium compound efflux SMR transporter	0	0	0	0	0	0	0	0	0	0	0	0	0	0	0	0	0	0	0	0	0	0	0	0	0	0	0	0	0	0	0	0	0	0	0	0	0	0	0	0	0	0	0	0
B5M07_00550	CP020694 (Chromosome)	124661	125143	-	protein-export chaperone SecB	2	1	6	18	17	36	12	5	6	140	141	124	165	63	36	7.66101	3.47111	19.3855	18.9333	19.3124	29.3942	16.5755	8.82671	7.24969	47.9288	64.3628	45.1342	37.9565	31.1122	28.971	3.61563	3.18801	4.32938	4.3012	4.32059	4.73991	4.17661	3.64079	3.46319	5.257	5.57481	5.19255	5.01012	4.8004
B5M07_00555	CP020694 (Chromosome)	125209	125712	-	exlusion protein FxsA	6	12	16	10	9	24	7	7	6	45	33	63	58	17	26	22.983	41.6533	51.6947	10.5185	10.2242	19.5961	9.66906	12.3574	7.24969	15.4057	15.0636	22.9311	13.3423	8.39536	20.9235	4.34343	4.95195	5.18633	3.61869	3.59521	4.20623	3.55198	3.77135	3.30952	3.96978	3.94811	4.36776	3.82939	3.4053
B5M07_00560	CP020694 (Chromosome)	125817	126476	+	preprotein translocase subunit Tim44	8	7	8	46	43	85	38	32	43	135	92	132	147	78	43	30.644	24.2978	25.8473	48.3851	48.8491	69.403	52.4892	56.491	51.9561	46.2171	41.9956	48.0461	33.8158	38.5199	34.6043	5.09552	4.88542	4.93781	5.53696	5.54658	5.913	5.61976	5.69444	5.60967	5.49099	5.3932	5.53082	5.17489	5.30592
B5M07_00565	CP020694 (Chromosome)	126518	127510	+	murein transglycosylase	3	8	11	19	37	67	10	12	14	90	94	140	143	61	50	11.4915	27.7689	35.5401	19.9851	42.033	54.7059	13.8129	21.1841	16.9159	30.8114	42.9085	50.958	32.8956	30.1245	40.2375	4.08647	4.81991	5.05891	4.49995	5.23707	5.51488	4.17113	4.56033	4.34739	4.92186	5.26185	5.44277	4.98859	4.89896
B5M07_00570	CP020694 (Chromosome)	127507	128091	+	DNA mismatch repair protein MutS	3	7	5	7	11	14	6	5	6	51	40	52	56	12	14	11.4915	24.2978	16.1546	7.36294	12.4963	11.4311	8.28777	8.82671	7.24969	17.4598	18.259	18.9272	12.8822	5.92614	11.2665	3.54958	4.2446	3.85156	3.1513	3.62338	3.53984	3.25807	3.31708	3.14256	3.95475	3.99847	4.03594	3.65438	2.94942
B5M07_00575	CP020694 (Chromosome)	128088	129305	-	MFS transporter	4	2	3	5	7	13	5	2	5	45	37	71	49	30	7	15.322	6.94222	9.69275	5.25925	7.95218	10.6146	6.90647	3.53068	6.04141	15.4057	16.8895	25.843	11.2719	14.8153	5.63325	3.68067	3.0288	3.28323	2.76263	3.10616	3.36687	2.99044	2.52729	2.87767	3.73428	3.82493	4.26396	3.42715	3.69301
B5M07_00580	CP020694 (Chromosome)	129344	130645	-	HslU--HslV peptidase ATPase subunit	4	5	8	2	25	42	10	23	30	143	169	419	140	80	72	15.322	17.3556	25.8473	2.1037	28.4007	34.2933	13.8129	40.6029	36.2485	48.9559	77.1441	152.51	32.2055	39.5076	57.942	4.35212	4.4475	4.79692	2.96639	4.88086	5.06938	4.2144	5.23905	5.12503	5.43916	5.92505	6.68134	5.00598	5.21493
B5M07_00585	CP020694 (Chromosome)	130642	131202	-	HslU--HslV peptidase proteolytic subunit	0	3	1	1	7	20	0	13	4	19	19	37	15	18	7	0	10.4133	3.23092	1.05185	7.95218	16.3301	0	22.9494	4.83313	6.50463	8.673	13.4675	3.45059	8.88921	5.63325	1.61354	3.03199	2.1883	1.48685	2.83157	3.54566	1.15536	3.87214	2.40265	2.6559	2.92536	3.363	2.09644	2.94824
B5M07_00590	CP020694 (Chromosome)	131303	132205	+	hypothetical protein	2	1	2	3	0	4	7	3	4	18	20	18	25	24	8	7.66101	3.47111	6.46183	3.15555	0	3.26602	9.66906	5.29603	4.83313	6.16228	9.12948	6.55174	5.75099	11.8523	6.438	2.69266	2.16023	2.5662	2.02163	1.01189	2.03489	2.94631	2.41842	2.34384	2.55193	2.91645	2.60751	2.49019	3.16977
B5M07_00595	CP020694 (Chromosome)	132286	132606	-	thiol reductase thioredoxin	9	4	8	10	14	23	10	25	15	228	190	267	278	97	45	34.4745	13.8844	25.8473	10.5185	15.9044	18.7796	13.8129	44.1336	18.1242	78.0555	86.73	97.1841	63.951	47.903	36.2138	5.08343	4.28376	4.80991	3.98943	4.34675	4.49332	4.22896	5.33519	4.46627	5.94732	6.06127	6.18663	5.73312	5.4255
B5M07_00600	CP020694 (Chromosome)	132643	136014	-	double-strand break repair helicase AddA	0	2	7	101	77	124	24	26	45	513	417	378	743	322	120	0	6.94222	22.6164	106.237	87.474	101.247	33.1511	45.8989	54.3727	175.625	190.35	137.587	170.919	159.018	96.57	3.74042	4.30987	5.07053	6.54824	6.34294	6.49772	5.37844	5.69084	5.85605	7.09494	7.18337	6.82811	7.06545	6.9854
B5M07_00605	CP020694 (Chromosome)	136011	138968	-	double-strand break repair protein AddB	8	5	1	52	57	66	33	12	46	333	242	258	587	271	158	30.644	17.3556	3.23092	54.6962	64.7535	53.8894	45.5827	21.1841	55.581	114.002	110.467	93.9083	135.033	133.832	127.151	5.24396	4.76964	3.86262	5.78692	5.95961	5.77174	5.60451	4.8937	5.80325	6.56019	6.52575	6.3518	6.74469	6.73388
B5M07_00610	CP020694 (Chromosome)	138961	139653	-	nucleotidyltransferase	2	1	3	9	7	4	1	3	5	49	19	35	55	50	22	7.66101	3.47111	9.69275	9.46664	7.95218	3.26602	1.38129	5.29603	6.04141	16.7751	8.673	12.7395	12.6522	24.6922	17.7045	3.01382	2.51498	3.20069	3.19013	3.0327	2.31381	1.92672	2.71117	2.79971	3.75882	3.11053	3.48192	3.47721	4.15617
B5M07_00615	CP020694 (Chromosome)	139626	140648	-	aminoglycoside phosphotransferase	1	0	1	0	9	2	6	4	0	56	23	30	78	30	6	3.83051	0	3.23092	0	10.2242	1.63301	8.28777	7.06137	0	19.1715	10.4989	10.9196	17.9431	14.8153	4.8285	2.25191	1.51538	2.14374	0.978075	3.03946	1.60285	2.8347	2.68476	1.04055	3.70503	3.08477	3.12659	3.63947	3.43136
B5M07_00620	CP020694 (Chromosome)	140636	141109	-	tRNA (adenosine(37)-N6)-threonylcarbamoyltransferase complex ATPase subunit type 1 TsaE	1	0	5	0	3	7	0	0	0	40	16	13	44	14	9	3.83051	0	16.1546	0	3.40808	5.71554	0	0	0	13.694	7.30358	4.73181	10.1217	6.91383	7.24275	1.93403	1.13677	3.19291	0.645133	1.8446	2.27948	0.759666	0.862682	0.703339	3.15391	2.52095	2.1208	2.85177	2.46712
B5M07_00625	CP020694 (Chromosome)	141166	142692	-	hypothetical protein	2	0	2	9	3	1	1	0	1	34	48	29	85	51	29	7.66101	0	6.46183	9.46664	3.40808	0.816506	1.38129	0	1.20828	11.6399	21.9107	10.5556	19.5534	25.1861	23.3378	2.83238	1.64965	2.70226	3.05164	2.19058	1.38669	1.71082	1.3333	1.62679	3.27025	3.92249	3.17199	3.80888	4.07052
B5M07_00630	CP020694 (Chromosome)	142778	144169	-	two-component sensor histidine kinase	2	6	3	6	8	3	7	7	11	42	21	30	57	34	17	7.66101	20.8267	9.69275	6.31109	9.08821	2.44952	9.66906	12.3574	13.2911	14.3787	9.58595	10.9196	13.1122	16.7907	13.6808	3.15512	4.02334	3.33046	2.95248	3.26537	2.26428	3.32184	3.54395	3.61632	3.70118	3.30996	3.43299	3.61126	3.85395
B5M07_00635	CP020694 (Chromosome)	144269	144883	+	SCO family protein	0	0	8	12	9	64	18	5	3	19	22	13	34	12	10	0	0	25.8473	12.6222	10.2242	52.2564	24.8633	8.82671	3.62485	6.50463	10.0424	4.73181	7.82134	5.92614	8.0475	1.97067	1.92404	4.16512	3.48022	3.27713	4.98475	4.16621	3.14087	2.42485	2.85631	3.2645	2.57651	3.0258	2.77667
B5M07_00640	CP020694 (Chromosome)	144936	145484	+	two-component system response regulator	9	10	4	24	24	43	15	12	8	63	53	63	112	46	10	34.4745	34.7111	12.9237	25.2444	27.2646	35.1098	20.7194	21.1841	9.66626	21.568	24.1931	22.9311	25.7644	22.7169	8.0475	4.88573	4.89515	3.98728	4.5888	4.66568	4.92642	4.39436	4.416	3.70403	4.43308	4.54785	4.49427	4.61214	4.48473
B5M07_00645	CP020694 (Chromosome)	145481	145960	-	GNAT family N-acetyltransferase	0	0	0	2	0	3	0	0	4	10	4	3	3	2	2	0	0	0	2.1037	0	2.44952	0	0	4.83313	3.42349	1.8259	1.09196	0.690118	0.98769	1.6095	0.068643	0.0315627	0.00457375	0.586264	-0.331091	0.703264	-0.285729	-0.22291	1.20362	0.994962	0.523639	0.215439	-0.0210996	0.165844
B5M07_00650	CP020694 (Chromosome)	145957	146553	-	hypothetical protein	0	2	3	3	6	11	7	0	5	17	12	16	47	10	4	0	6.94222	9.69275	3.15555	6.81616	8.98157	9.66906	0	6.04141	5.81993	5.47769	5.82377	10.8119	4.93845	3.219	1.50421	2.59964	2.88466	2.00371	2.61632	2.87593	2.93013	1.17667	2.51075	2.48508	2.43055	2.48552	3.07292	2.34043
B5M07_00655	CP020694 (Chromosome)	146623	146931	+	S-adenosyl-L-homocysteine hydrolase	3	8	4	54	64	110	24	15	12	4	8	18	2	12	13	11.4915	27.7689	12.9237	56.7999	72.7057	89.8157	33.1511	26.4801	14.4994	1.3694	3.65179	6.55174	0.460079	5.92614	10.4618	3.63723	4.46775	3.73448	5.27816	5.55392	5.79828	4.68411	4.44104	3.83951	1.94575	2.61381	3.08903	1.41443	3.00882
B5M07_00660	CP020694 (Chromosome)	147017	148408	+	adenosylhomocysteinase	19	33	41	286	496	720	85	20	20	174	145	137	287	103	49	72.7796	114.547	132.468	300.829	563.469	587.884	117.41	35.3068	24.1656	59.5687	66.1887	49.866	66.0213	50.866	39.4328	6.30736	6.76399	6.91582	7.81101	8.51658	8.56409	6.79166	5.62056	5.2888	6.10067	6.20558	5.92724	6.20237	5.94725
B5M07_00665	CP020694 (Chromosome)	148615	149526	+	hypothetical protein	79	144	246	1737	2924	4609	274	234	316	58	234	353	80	105	136	302.61	499.84	794.805	1827.06	3321.74	3763.28	378.475	413.09	381.817	19.8562	106.815	128.487	18.4032	51.8537	109.446	8.25311	8.78132	9.28681	10.2279	10.9231	11.0699	8.48656	8.57889	8.49588	5.86585	7.22483	7.39862	5.8118	6.58668
B5M07_00670	CP020694 (Chromosome)	149716	150057	+	hypothetical protein	10	2	3	35	25	20	12	10	24	53	67	76	164	75	76	38.3051	6.94222	9.69275	36.8147	28.4007	16.3301	16.5755	17.6534	28.9988	18.1445	30.5837	27.6629	37.7265	37.0384	61.161	5.05641	3.6397	3.84842	5.03232	4.76769	4.22953	4.25001	4.3116	4.78841	4.32488	4.8448	4.74294	5.06275	5.04195
B5M07_00675	CP020694 (Chromosome)	150325	150744	-	ubiquinol-cytochrome C reductase	1	0	0	3	3	7	7	3	7	46	18	23	39	26	15	3.83051	0	0	3.15555	3.40808	5.71554	9.66906	5.29603	8.45797	15.748	8.21653	8.37167	8.97154	12.84	12.0713	2.34389	1.63312	1.6018	2.1202	2.17812	2.57212	3.03651	2.51864	2.91607	3.54246	2.90038	2.91942	2.98772	3.33212
B5M07_00680	CP020694 (Chromosome)	150744	151016	-	hypothetical protein	0	0	0	3	4	0	0	0	0	7	0	19	12	4	1	0	0	0	3.15555	4.5441	0	0	0	0	2.39644	0	6.91572	2.76047	1.97538	0.80475	0.0747785	0.0362558	0.00821703	0.90919	1.20431	-0.430806	-0.296768	-0.228116	-0.331032	0.753573	-0.570168	1.66363	0.873618	0.600753
B5M07_00685	CP020694 (Chromosome)	151018	151971	-	glycerol-3-phosphate dehydrogenase	3	0	2	14	13	17	11	4	11	81	47	74	142	73	44	11.4915	0	6.46183	14.7259	14.7683	13.8806	15.1942	7.06137	13.2911	27.7303	21.4543	26.9349	32.6656	36.0507	35.409	3.72251	2.45723	3.29632	3.92093	3.92389	3.86392	3.95128	3.30182	3.82546	4.55762	4.29292	4.52716	4.73057	4.83153
B5M07_00690	CP020694 (Chromosome)	151968	153071	-	tRNA (adenosine(37)-N6)-threonylcarbamoyltransferase complex transferase subunit TsaD	5	6	5	17	19	25	14	25	8	81	31	86	159	61	28	19.1525	20.8267	16.1546	17.8814	21.5845	20.4126	19.3381	44.1336	9.66626	27.7303	14.1507	31.3028	36.5763	30.1245	22.533	4.33842	4.41305	4.18635	4.26312	4.44447	4.38964	4.33908	5.16665	3.71764	4.69623	4.03646	4.82031	4.98282	4.78012
B5M07_00695	CP020694 (Chromosome)	153147	153845	+	hypothetical protein	1	1	0	3	1	0	3	2	0	9	4	6	6	3	1	3.83051	3.47111	0	3.15555	1.13603	0	4.14388	3.53068	0	3.08114	1.8259	2.18391	1.38024	1.48153	0.80475	1.20637	1.15439	0.342931	1.19501	0.565216	-0.100338	1.39149	1.24263	0.0144715	1.21662	0.821746	0.950193	0.633438	0.685864
B5M07_00700	CP020694 (Chromosome)	154565	155497	+	hypothetical protein	8	9	6	43	52	90	26	28	16	174	201	239	320	237	185	30.644	31.24	19.3855	45.2295	59.0734	73.4855	35.9137	49.4296	19.3325	59.5687	91.7512	86.9925	73.6126	117.041	148.879	5.2269	5.24113	4.83284	5.58098	5.85079	6.07738	5.35634	5.67064	4.7865	5.86	6.31303	6.25663	6.08056	6.57476
B5M07_00705	CP020694 (Chromosome)	155508	157013	+	heme biosynthesis protein HemY	32	23	10	96	165	240	77	71	115	511	506	662	809	660	488	122.576	79.8356	32.3092	100.978	187.444	195.961	106.36	125.339	138.952	174.94	230.976	240.958	186.102	325.938	392.718	7.03804	6.62156	5.83754	6.84122	7.47267	7.51957	6.89343	7.0584	7.16272	7.40081	7.69409	7.73937	7.46566	8.06546
B5M07_00710	CP020694 (Chromosome)	157003	157452	-	GNAT family N-acetyltransferase	0	1	0	7	3	2	8	5	2	35	12	29	44	18	10	0	3.47111	0	7.36294	3.40808	1.63301	11.0504	8.82671	2.41656	11.9822	5.47769	10.5556	10.1217	8.88921	8.0475	1.54365	2.17201	1.4723	2.71265	2.08842	1.60169	3.08407	2.86287	1.86748	3.19563	2.45493	3.06966	3.03253	2.89963
B5M07_00715	CP020694 (Chromosome)	157498	158343	-	nicotinate-nucleotide diphosphorylase (carboxylating)	0	0	4	13	30	37	15	18	16	49	51	71	75	32	34	0	0	12.9237	13.674	34.0808	30.2107	20.7194	31.7762	19.3325	16.7751	23.2802	25.843	17.253	15.803	27.3615	2.54727	2.49644	3.84029	3.87403	4.78394	4.66152	4.2735	4.70364	4.20604	4.06818	4.3965	4.50436	4.09604	4.00976
B5M07_00720	CP020694 (Chromosome)	158340	159902	-	L-aspartate oxidase	20	8	9	55	39	44	17	51	31	81	50	40	69	34	35	76.6101	27.7689	29.0782	57.8517	44.305	35.9263	23.482	90.0325	37.4567	27.7303	22.8237	14.5594	15.8727	16.7907	28.1663	5.89171	4.86512	4.90802	5.61019	5.33045	5.11651	4.69841	6.08054	5.15809	4.85579	4.66462	4.2398	4.31606	4.37342
B5M07_00725	CP020694 (Chromosome)	159914	160966	-	quinolinate synthase	11	22	20	76	52	55	17	21	16	94	46	44	185	39	21	42.1356	76.3645	64.6183	79.9405	59.0734	44.9078	23.482	37.0722	19.3325	32.1808	20.9978	16.0154	42.5573	19.2599	16.8998	5.30863	5.92567	5.74981	5.9895	5.66636	5.3815	4.73953	5.1845	4.55715	5.04246	4.62444	4.36995	5.32768	4.54326
B5M07_00730	CP020694 (Chromosome)	161101	161973	-	RpiR family transcriptional regulator	135	270	154	368	339	120	54	158	162	300	357	271	192	176	98	517.118	937.2	497.561	387.08	385.113	97.9807	74.5899	278.924	195.742	102.705	162.961	98.6401	44.1676	86.9167	78.8655	8.63431	9.30528	8.59237	8.31928	8.31363	6.8958	6.63852	7.9651	7.59271	6.94024	7.40358	6.9008	6.15489	6.77874
B5M07_00735	CP020694 (Chromosome)	162093	162872	+	N-formylglutamate amidohydrolase	6	6	1	108	82	14	6	3	19	60	63	73	77	65	43	22.983	20.8267	3.23092	113.6	93.1541	11.4311	8.28777	5.29603	22.9574	20.5409	28.7578	26.5709	17.713	32.0999	34.6043	4.51334	4.42191	3.172	6.22343	5.99998	3.85236	3.60129	3.30392	4.51323	4.40222	4.74239	4.66176	4.25524	4.85567
B5M07_00740	CP020694 (Chromosome)	162869	163435	+	C4-dicarboxylate ABC transporter	2	2	4	122	62	25	6	14	18	71	79	90	87	79	63	7.66101	6.94222	12.9237	128.326	70.4336	20.4126	8.28777	24.7148	21.7491	24.3068	36.0614	32.7587	20.0134	39.0137	50.6993	3.74157	3.66716	4.08914	6.40679	5.74307	4.4629	3.68584	4.65142	4.52619	4.63319	5.03526	4.93635	4.43987	5.11699
B5M07_00745	CP020694 (Chromosome)	163435	164760	+	C4-dicarboxylate ABC transporter	19	38	12	575	327	156	47	22	102	218	196	174	265	185	103	72.7796	131.902	38.771	604.813	371.481	127.375	64.9209	38.8375	123.245	74.6321	89.4689	63.3335	60.9605	91.3613	82.8893	6.32571	6.92688	5.73901	8.61185	8.05934	6.8934	6.20734	5.7244	6.8584	6.34308	6.52719	6.17927	6.14097	6.54863
B5M07_00750	CP020694 (Chromosome)	164811	165848	+	C4-dicarboxylate ABC transporter	40	44	76	1018	854	920	267	90	253	167	185	163	354	384	208	153.22	152.729	245.55	1070.78	970.166	751.185	368.806	158.881	305.695	57.1723	84.4477	59.3296	81.434	189.636	167.388	7.40633	7.40272	7.88619	9.50353	9.3912	9.1026	8.31876	7.44025	8.11796	6.46117	6.82066	6.49459	6.78512	7.61908
B5M07_00755	CP020694 (Chromosome)	165908	167272	+	glutamine synthetase	9	26	24	579	372	264	64	40	86	221	220	209	294	196	201	34.4745	90.2489	77.542	609.021	422.602	215.558	88.4029	70.6137	103.912	75.6591	100.424	76.073	67.6316	96.7936	161.755	5.72412	6.60033	6.45101	8.66721	8.25049	7.50833	6.57664	6.35554	6.73995	6.41887	6.70463	6.42436	6.30742	6.66712
B5M07_00760	CP020694 (Chromosome)	167275	168648	+	aldehyde dehydrogenase	5	10	15	187	144	158	35	7	24	117	121	177	186	104	95	19.1525	34.7111	48.4637	196.696	163.588	129.008	48.3453	12.3574	28.9988	40.0548	55.2333	64.4254	42.7873	51.3599	76.4513	4.8266	5.33012	5.64699	7.14072	6.93518	6.67543	5.64242	4.43192	5.14517	5.45204	5.77708	5.9362	5.51766	5.70277
B5M07_00765	CP020694 (Chromosome)	168652	169797	+	alcohol dehydrogenase	10	6	14	104	103	145	51	29	45	243	256	322	312	154	106	38.3051	20.8267	45.2328	109.392	117.011	118.393	70.446	51.1949	54.3727	83.1908	116.857	117.203	71.7723	76.0521	85.3035	5.57011	5.05596	5.71901	6.60649	6.67778	6.69108	6.14892	5.83133	5.88879	6.32039	6.67804	6.68142	6.16785	6.22741
B5M07_00770	CP020694 (Chromosome)	169859	170332	-	cytochrome C	1	0	5	64	106	601	90	7	31	92	99	139	114	60	19	3.83051	0	16.1546	67.3183	120.419	490.72	124.317	12.3574	37.4567	31.4961	45.1909	50.594	26.2245	29.6307	15.2903	3.62176	3.12975	4.44721	5.8244	6.46024	8.08049	6.49422	4.19191	5.21103	5.03492	5.40556	5.52422	4.85082	4.97396
B5M07_00775	CP020694 (Chromosome)	170528	171058	+	isopentenyl-diphosphate delta-isomerase	1	5	5	6	3	6	5	0	6	35	5	17	20	23	13	3.83051	17.3556	16.1546	6.31109	3.40808	4.89904	6.90647	0	7.24969	11.9822	2.28237	6.18775	4.60079	11.3584	10.4618	2.34853	3.55906	3.4935	2.6623	2.18019	2.44623	2.73947	1.33162	2.78296	3.27465	1.84449	2.64403	2.3788	3.21773
B5M07_00780	CP020694 (Chromosome)	171078	171959	+	coproporphyrinogen III oxidase	0	1	0	19	7	35	23	0	7	58	17	37	101	44	19	0	3.47111	0	19.9851	7.95218	28.5777	31.7698	0	8.45797	19.8562	7.76005	13.4675	23.234	21.7292	15.2903	2.1168	2.65136	2.0332	4.01788	3.13418	4.39686	4.49867	1.73344	3.18926	4.02386	3.10187	3.62939	4.18975	4.11464
B5M07_00785	CP020694 (Chromosome)	172195	173235	-	uroporphyrinogen decarboxylase	0	7	7	31	21	167	36	9	13	80	34	49	103	23	24	0	24.2978	22.6164	32.6073	23.8566	136.356	49.7266	15.8881	15.7077	27.3879	15.5201	17.8353	23.6941	11.3584	19.314	2.77815	4.55543	4.48777	4.85905	4.54173	6.42157	5.30039	4.15511	4.13908	4.68362	4.11961	4.25354	4.53635	3.82802
B5M07_00790	CP020694 (Chromosome)	173320	174267	+	hydroxymethylbilane synthase	5	9	14	12	20	24	11	21	12	125	61	54	204	61	34	19.1525	31.24	45.2328	12.6222	22.7205	19.5961	15.1942	37.0722	14.4994	42.7936	27.8449	19.6552	46.928	30.1245	27.3615	4.41621	4.86948	5.244	4.01658	4.5615	4.41736	4.18719	5.04842	4.14243	5.20607	4.76273	4.41717	5.30402	4.84235
B5M07_00795	CP020694 (Chromosome)	174264	175196	+	hypothetical protein	0	0	0	5	4	8	2	1	3	28	21	13	29	18	7	0	0	0	5.25925	4.5441	6.53205	2.76259	1.76534	3.62485	9.58577	9.58595	4.73181	6.67114	8.88921	5.63325	1.30539	1.26803	1.24055	2.26433	2.14366	2.45769	1.78853	1.56428	1.97057	2.83194	2.8275	2.18236	2.49328	2.75388
B5M07_00800	CP020694 (Chromosome)	175259	177337	+	methylhydantoinase	7	25	9	26	15	9	40	30	37	76	44	39	78	38	24	26.8135	86.7778	29.0782	27.3481	17.0404	7.34855	55.2518	52.9603	44.7064	26.0185	20.0848	14.1954	17.9431	18.7661	19.314	4.73374	5.95271	4.81198	4.75455	4.29882	3.5656	5.48007	5.43198	5.25718	4.70489	4.44894	4.11662	4.33746	4.3834
B5M07_00805	CP020694 (Chromosome)	177342	179051	+	5-oxoprolinase	3	2	7	15	19	11	18	20	40	52	19	25	33	25	17	11.4915	6.94222	22.6164	15.7777	21.5845	8.98157	24.8633	35.3068	48.3313	17.8021	8.673	9.09964	7.5913	12.3461	13.6808	3.6969	3.32385	4.30301	3.96617	4.27421	3.44451	4.41491	4.77337	5.11591	4.08657	3.40371	3.44444	3.27711	3.73007
B5M07_00810	CP020694 (Chromosome)	179150	179839	+	fumarylacetoacetate hydrolase	10	2	3	12	14	19	1	3	5	71	52	75	98	29	7	38.3051	6.94222	9.69275	12.6222	15.9044	15.5136	1.38129	5.29603	6.04141	24.3068	23.7366	27.2989	22.5439	14.3215	5.63325	4.7463	3.19912	3.44179	3.66127	3.88324	3.86101	2.20849	2.95233	3.02361	4.32188	4.29553	4.44297	4.24534	3.7842
B5M07_00815	CP020694 (Chromosome)	179855	181222	-	tetratricopeptide repeat protein 38 family protein	7	6	5	26	23	20	22	12	29	194	143	244	239	183	142	26.8135	20.8267	16.1546	27.3481	26.1286	16.3301	30.3885	21.1841	35.0402	66.4157	65.2758	88.8125	54.9794	90.3736	114.275	4.93888	4.7153	4.504	4.93911	4.89605	4.45983	5.04269	4.70817	5.18188	5.84246	5.82357	6.15367	5.64355	6.17178
B5M07_00820	CP020694 (Chromosome)	181219	182028	-	lipolytic enzyme	4	1	0	2	7	2	0	4	2	77	47	51	86	62	41	15.322	3.47111	0	2.1037	7.95218	1.63301	0	7.06137	2.41656	26.3609	21.4543	18.5633	19.7834	30.6184	32.9948	3.60678	2.50074	1.85038	2.04185	3.02783	1.86469	1.43224	2.92908	2.14101	4.2423	4.02031	3.87068	3.94045	4.39999
B5M07_00825	CP020694 (Chromosome)	182021	183010	-	peptidase T4	3	0	6	12	4	12	2	5	12	84	53	62	95	77	36	11.4915	0	19.3855	12.6222	4.5441	9.79807	2.76259	8.82671	14.4994	28.7573	24.1931	22.5671	21.8537	38.0261	28.971	3.62677	2.3166	4.09477	3.69711	2.84899	3.46127	2.56379	3.3869	3.82859	4.52919	4.34708	4.27635	4.24487	4.82396
B5M07_00830	CP020694 (Chromosome)	183019	183249	-	hypothetical protein	0	1	0	0	0	0	0	0	0	3	0	0	11	0	0	0	3.47111	0	0	0	0	0	0	0	1.02705	0	0	2.53043	0	0	-1.1706	-0.661997	-1.21614	-1.5163	-1.49571	-1.58405	-1.44342	-1.37781	-1.47922	-0.917726	-1.68417	-1.70481	-0.31441	-1.67656
B5M07_00835	CP020694 (Chromosome)	183261	184598	-	4-aminobutyrate--2-oxoglutarate transaminase	12	48	46	187	175	245	57	20	41	155	114	166	261	355	150	45.9661	166.613	148.622	196.696	198.805	200.044	78.7338	35.3068	49.5396	53.0641	52.038	60.4216	60.0403	175.315	120.713	5.86296	7.14797	7.02656	7.33257	7.34398	7.35149	6.37041	5.60683	5.91483	5.97603	5.95765	6.10374	6.09695	7.20909
B5M07_00840	CP020694 (Chromosome)	184843	185394	+	aldehyde dehydrogenase	7	4	1	7	0	7	7	7	4	29	16	13	20	5	6	26.8135	13.8844	3.23092	7.36294	0	5.71554	9.66906	12.3574	4.83313	9.92812	7.30358	4.73181	4.60079	2.46922	4.8285	4.00249	3.33222	2.22696	2.79035	1.10995	2.56724	3.03634	3.26262	2.43294	3.08402	2.78853	2.39731	2.36931	1.89023
B5M07_00845	CP020694 (Chromosome)	185767	187491	-	ATPase	71	167	263	4598	5757	8681	727	201	122	1011	1993	1857	1522	733	620	271.966	579.676	849.731	4836.4	6540.1	7088.09	1004.2	354.834	147.41	346.115	909.752	675.921	350.12	361.988	498.945	8.59047	9.32076	9.71267	11.6289	11.976	12.0682	9.88804	8.83702	8.04542	8.81143	9.78416	9.4761	8.82233	8.85471
B5M07_00850	CP020694 (Chromosome)	187494	188051	-	RNA polymerase subunit sigma	76	384	660	2711	3636	4882	1283	453	434	370	906	900	479	291	485	291.118	1332.91	2132.4	2851.56	4130.59	3986.18	1772.2	799.7	524.394	126.669	413.565	327.587	110.189	143.709	390.304	8.59373	10.1466	10.6635	10.9905	11.4129	11.3721	10.4589	9.60214	9.16758	7.83885	8.92961	8.70157	7.72252	7.94699
B5M07_00855	CP020694 (Chromosome)	188051	188203	-	regulator	0	0	0	18	5	17	22	0	9	17	9	26	19	2	3	0	0	0	18.9333	5.68013	13.8806	30.3885	0	10.8745	5.81993	4.10826	9.46362	4.37075	0.98769	2.41425	1.40627	1.36511	1.33477	3.59727	2.41246	3.28167	4.09929	1.06994	3.01927	2.44434	2.13242	2.9115	2.18375	1.16019
B5M07_00860	CP020694 (Chromosome)	188315	189124	+	response regulator	96	309	695	1441	1686	2938	984	449	538	315	532	677	422	245	347	367.729	1072.57	2245.49	1515.71	1915.34	2398.89	1359.19	792.639	650.056	107.84	242.844	246.418	97.0766	120.992	279.248	8.7063	9.82342	10.6431	10.2039	10.4649	10.7189	10.0833	9.49866	9.28905	7.55847	8.29722	8.31108	7.4687	7.65861
B5M07_00865	CP020694 (Chromosome)	189230	189535	+	hypothetical protein	0	13	15	133	130	216	46	9	9	36	48	63	41	25	30	0	45.1244	48.4637	139.896	147.683	176.365	63.5396	15.8881	10.8745	12.3246	21.9107	22.9311	9.43162	12.3461	24.1425	3.02668	5.31191	5.38704	6.56151	6.62228	6.82672	5.68605	4.30581	3.96497	4.04323	4.59085	4.6351	3.7985	4.04987
B5M07_00870	CP020694 (Chromosome)	189537	189887	+	hypothetical protein	26	58	119	926	1455	1912	338	94	75	262	393	444	337	292	146	99.5931	201.324	384.479	974.012	1652.92	1561.16	466.878	165.942	90.6211	89.6954	179.394	161.61	77.5233	144.203	117.494	7.0653	7.7422	8.41528	9.4412	10.0373	9.97443	8.62573	7.5471	6.96692	6.95289	7.62362	7.51884	6.82008	7.40615
B5M07_00875	CP020694 (Chromosome)	190300	191028	+	Crp/Fnr family transcriptional regulator	3	5	10	24	30	27	5	7	18	98	84	76	157	83	50	11.4915	17.3556	32.3092	25.2444	34.0808	22.0457	6.90647	12.3574	21.7491	33.5502	38.3438	27.6629	36.1162	40.9891	40.2375	3.98224	4.30691	4.88487	4.64657	4.94863	4.51306	3.52244	3.99351	4.50096	4.93661	5.07448	4.7392	5.01358	5.14397
B5M07_00880	CP020694 (Chromosome)	191032	191961	-	ribonuclease BN	17	14	8	42	74	73	69	72	73	373	300	533	323	200	89	65.1186	48.5956	25.8473	44.1777	84.0659	59.6049	95.3094	127.105	88.2046	127.696	136.942	194.004	74.3027	98.769	71.6228	6.12471	5.84412	5.28892	5.73974	6.37889	6.03093	6.50828	6.8098	6.4283	6.8177	6.89213	7.26972	6.25228	6.54634
B5M07_00885	CP020694 (Chromosome)	192010	192855	-	transporter (formate/nitrite transporter family protein)	12	8	13	44	73	104	43	27	68	94	171	231	113	73	71	45.9661	27.7689	42.0019	46.2814	82.9299	84.9166	59.3957	47.6642	82.1632	32.1808	78.057	84.0807	25.9945	36.0507	57.1373	5.57909	5.11169	5.49109	5.58213	6.18335	6.20949	5.83497	5.61236	6.1733	5.22072	6.12153	6.20052	5.01478	5.33262
B5M07_00890	CP020694 (Chromosome)	193054	194316	-	hsp70 family protein	1	0	0	6	4	4	4	2	5	8	20	21	31	4	9	3.83051	0	0	6.31109	4.5441	3.26602	5.52518	3.53068	6.04141	2.73879	9.12948	7.6437	7.13122	1.97538	7.24275	2.02649	1.2639	1.23624	2.41909	2.14153	1.88419	2.29832	1.95725	2.37741	1.73433	2.7798	2.61414	2.5535	1.51367
B5M07_00895	CP020694 (Chromosome)	194476	195960	+	ABC transporter substrate-binding protein	6	6	10	205	108	133	87	25	107	351	242	278	624	502	155	22.983	20.8267	32.3092	215.629	122.691	108.595	120.173	44.1336	129.286	120.164	110.467	101.188	143.545	247.91	124.736	5.28485	5.2032	5.54683	7.43192	6.82652	6.69914	6.80444	5.80858	6.88157	6.80566	6.71728	6.62596	6.99418	7.58652
B5M07_00900	CP020694 (Chromosome)	196037	196474	-	hypothetical protein	154	468	1195	7072	7681	16473	1317	661	1118	174	717	933	266	192	201	589.898	1624.48	3860.94	7438.68	8725.82	13450.3	1819.17	1166.89	1350.86	59.5687	327.292	339.598	61.1905	94.8182	161.755	9.40326	10.457	11.4162	12.1701	12.3564	12.8663	10.5802	10.1038	10.2594	7.43954	8.8309	8.86543	7.45604	7.77366
B5M07_00905	CP020694 (Chromosome)	196726	197673	+	peptide ABC transporter	4	2	10	14	14	14	8	15	18	228	132	175	328	200	64	15.322	6.94222	32.3092	14.7259	15.9044	11.4311	11.0504	26.4801	21.7491	78.0555	60.2545	63.6975	75.4529	98.769	51.504	4.32048	3.76494	4.98241	4.23413	4.30508	4.00506	3.99715	4.7884	4.59673	5.91771	5.63708	5.69738	5.88161	6.17493
B5M07_00910	CP020694 (Chromosome)	197670	198485	+	peptide ABC transporter permease	0	1	2	17	4	6	17	20	17	259	140	162	347	186	111	0	3.47111	6.46183	17.8814	4.5441	4.89904	23.482	35.3068	20.5408	88.6684	63.9063	58.9657	79.8237	91.8551	89.3273	2.87168	3.2867	3.57628	4.31522	3.20424	3.22046	4.57999	4.98904	4.44917	5.9912	5.62967	5.54302	5.8758	6.02911
B5M07_00915	CP020694 (Chromosome)	198482	200083	+	microcin ABC transporter ATP-binding protein	17	10	12	69	54	37	38	50	58	784	617	716	968	503	264	65.1186	34.7111	38.771	72.5776	61.3454	30.2107	52.4892	88.2671	70.0804	268.402	281.644	260.614	222.678	248.404	212.454	6.23379	5.66457	5.75646	6.33099	6.16584	5.5041	6.01705	6.52817	6.29671	7.70971	7.76262	7.67722	7.50512	7.62419
B5M07_00920	CP020694 (Chromosome)	200316	201275	+	C4-dicarboxylate ABC transporter substrate-binding protein	80	64	54	452	685	1172	574	284	661	772	1100	1173	1287	869	495	306.44	222.151	174.469	475.436	778.178	956.945	792.863	501.357	798.674	264.293	502.121	426.955	296.061	429.151	398.351	8.41362	8.09837	7.87097	8.862	9.38559	9.61032	9.40568	8.91743	9.41365	8.26367	8.91922	8.75016	8.3767	8.75548
B5M07_00925	CP020694 (Chromosome)	201379	204132	+	C4-dicarboxylate ABC transporter	108	87	78	725	1130	1368	721	456	1110	1930	2200	2736	2639	2371	1488	413.695	301.987	252.011	762.591	1283.71	1116.98	995.914	804.996	1341.19	660.733	1004.24	995.864	607.074	1170.91	1197.47	8.9696	8.66853	8.50129	9.58478	10.1355	9.98643	9.86443	9.64101	10.1827	9.43687	9.87338	9.86453	9.3503	10.0369
B5M07_00930	CP020694 (Chromosome)	204145	204576	+	hypothetical protein	5	5	1	36	29	35	41	12	50	58	69	108	85	43	52	19.1525	17.3556	3.23092	37.8666	32.9448	28.5777	56.6331	21.1841	60.4141	19.8562	31.4967	39.3104	19.5534	21.2353	41.847	4.44207	4.3544	3.30921	5.09527	4.95248	4.80973	5.51551	4.51993	5.58602	4.44875	4.90884	5.13765	4.43288	4.5152
B5M07_00935	CP020694 (Chromosome)	204644	205726	+	carbon-nitrogen hydrolase family protein	7	12	5	95	113	164	102	34	103	251	310	362	420	264	161	26.8135	41.6533	16.1546	99.9257	128.371	133.907	140.892	60.0216	124.453	85.9296	141.507	131.763	96.6166	130.375	129.565	5.37179	5.74165	4.98109	6.58949	6.85195	6.89731	6.95034	6.07567	6.81906	6.43389	6.95683	6.88099	6.55507	6.86951
B5M07_00940	CP020694 (Chromosome)	205792	208527	+	ornithine decarboxylase	36	20	25	628	522	632	472	113	447	830	662	609	1191	744	453	137.898	69.4222	80.7729	660.561	593.006	516.032	651.971	199.484	540.102	284.15	302.186	221.667	273.977	367.421	364.552	7.45106	6.83635	6.96321	9.06496	8.94703	8.79649	9.05037	7.80643	8.84552	8.16548	8.22931	7.91123	8.1278	8.43403
B5M07_00945	CP020694 (Chromosome)	208545	210002	+	biotin carboxylase	27	23	27	581	524	657	349	106	401	728	533	522	1008	618	375	103.424	79.8356	87.2347	611.124	595.278	536.444	482.072	187.126	484.521	249.23	243.301	190	231.88	305.196	301.781	7.12811	6.89404	6.97102	8.94088	8.91199	8.79852	8.68203	7.69355	8.68765	7.98447	7.95966	7.70751	7.91015	8.19531
B5M07_00950	CP020694 (Chromosome)	210020	210991	+	hypothetical protein	6	9	10	153	148	175	82	38	75	263	207	214	268	186	102	22.983	31.24	32.3092	160.933	168.132	142.889	113.266	67.083	90.6211	90.0378	94.4901	77.8929	61.6506	91.8551	82.0845	5.18951	5.43305	5.459	7.05314	7.10041	6.92538	6.67659	6.13712	6.4436	6.43764	6.48782	6.28782	6.04974	6.4583
B5M07_00955	CP020694 (Chromosome)	210988	212091	+	carnitine dehydratase	0	5	1	24	29	38	9	5	16	51	38	58	95	57	16	0	17.3556	3.23092	25.2444	32.9448	31.0272	12.4317	8.82671	19.3325	17.4598	17.346	21.1112	21.8537	28.1492	12.876	2.50247	4.06968	2.92405	4.44965	4.72449	4.66559	3.76194	3.47314	4.18049	4.08322	4.07642	4.27373	4.30988	4.56787
B5M07_00960	CP020694 (Chromosome)	212143	212703	-	protease	2	7	11	65	98	203	13	6	7	1	5	4	11	2	0	7.66101	24.2978	35.5401	68.3702	111.331	165.751	17.9568	10.5921	8.45797	0.342349	2.28237	1.45594	2.53043	0.98769	0	3.11091	4.1817	4.60034	5.38711	5.95226	6.4253	3.90478	3.37653	3.16636	1.10385	2.0506	1.7308	2.08043	1.57479
B5M07_00965	CP020694 (Chromosome)	212861	213508	+	paraquat-inducible protein A	5	2	0	7	8	17	9	2	4	16	13	30	49	16	7	19.1525	6.94222	0	7.36294	9.08821	13.8806	12.4317	3.53068	4.83313	5.47758	5.93416	10.9196	11.2719	7.90152	5.63325	3.74081	2.84672	1.75766	2.88913	3.07796	3.48907	3.36926	2.34629	2.54319	2.62254	2.69502	3.26216	3.29557	2.95344
B5M07_00970	CP020694 (Chromosome)	213520	214125	+	paraquat-inducible protein A	0	2	4	7	24	9	2	1	0	40	53	53	79	21	6	0	6.94222	12.9237	7.36294	27.2646	7.34855	2.76259	1.76534	0	13.694	24.1931	19.2912	18.1731	10.3707	4.8285	1.88055	2.88929	3.41475	2.92404	4.22119	2.92119	2.20223	2.01687	1.32933	3.52404	4.11118	3.87526	3.8165	3.24593
B5M07_00975	CP020694 (Chromosome)	214118	216202	+	paraquat-inducible protein B	5	5	6	60	56	152	41	14	42	237	195	285	286	157	65	19.1525	17.3556	19.3855	63.1109	63.6175	124.109	56.6331	24.7148	50.7478	81.1367	89.0124	103.736	65.7913	77.5336	52.3088	4.82054	4.73696	4.8182	5.90795	5.91607	6.62746	5.79645	4.99954	5.68519	6.17254	6.27059	6.43497	5.95251	6.12409
B5M07_00980	CP020694 (Chromosome)	216206	216772	+	hypothetical protein	0	0	0	6	10	13	1	6	4	25	13	46	20	5	5	0	0	0	6.31109	11.3603	10.6146	1.38129	10.5921	4.83313	8.55872	5.93416	16.7433	4.60079	2.46922	4.02375	1.42944	1.38939	1.3599	2.50806	3.05603	3.00052	1.51255	2.96649	2.28077	2.80716	2.46205	3.47776	2.23625	1.74574
B5M07_00985	CP020694 (Chromosome)	216901	217371	+	hypothetical protein	11	35	53	46	47	201	9	27	9	38	51	49	21	17	19	42.1356	121.489	171.239	48.3851	53.3932	164.118	12.4317	47.6642	10.8745	13.0093	23.2802	17.8353	4.83083	8.39536	15.2903	5.24983	6.39226	6.78378	5.40625	5.50992	6.7513	4.09559	5.38664	3.97711	4.10384	4.66038	4.40033	3.26101	3.72633
B5M07_00990	CP020694 (Chromosome)	217414	218655	+	efflux transporter periplasmic adaptor subunit	20	45	50	59	81	409	51	17	25	78	108	153	67	15	17	76.6101	156.2	161.546	62.0591	92.0181	333.951	70.446	30.0108	30.207	26.7032	49.2992	55.6898	15.4126	7.40767	13.6808	6.09407	6.86307	6.90146	5.8818	6.29663	7.7316	6.01309	5.16378	5.16496	5.03824	5.64555	5.77064	4.52812	3.94801
B5M07_00995	CP020694 (Chromosome)	218652	221783	+	MFS transporter	32	41	52	216	125	678	123	109	123	323	520	750	224	173	168	122.576	142.316	168.008	227.199	142.003	553.591	169.899	192.422	148.619	110.579	237.366	272.989	51.5288	85.4352	135.198	7.05671	7.20594	7.37519	7.69204	7.20257	8.66508	7.38704	7.51648	7.24916	6.94891	7.73913	7.88893	6.21654	6.69471
B5M07_01000	CP020694 (Chromosome)	221821	222285	-	PTS lactose transporter subunit IIC	6	5	5	22	18	15	14	13	20	67	49	52	164	72	46	22.983	17.3556	16.1546	23.1407	20.4485	12.2476	19.3381	22.9494	24.1656	22.9374	22.3672	18.9272	37.7265	35.5568	37.0185	4.51631	4.26332	4.1996	4.52372	4.40333	3.92311	4.35072	4.5154	4.56625	4.51521	4.49016	4.3255	5.02483	4.96118
B5M07_01005	CP020694 (Chromosome)	222326	222892	-	ribosomal subunit interface protein	25	7	17	44	28	32	22	11	30	146	83	140	432	197	122	95.7626	24.2978	54.9256	46.2814	31.8087	26.1282	30.3885	19.4188	36.2485	49.9829	37.8873	50.958	99.377	97.2874	98.1795	6.28771	4.94447	5.71127	5.54004	5.1699	4.97985	5.12783	4.72687	5.29715	5.61856	5.33829	5.63838	6.34339	6.31931
B5M07_01010	CP020694 (Chromosome)	223201	223956	-	LPS export ABC transporter ATP-binding protein	13	12	27	45	44	69	36	19	28	118	100	65	131	87	41	49.7966	41.6533	87.2347	47.3332	49.9852	56.3389	49.7266	33.5415	33.8319	40.3972	45.6474	23.6591	30.1352	42.9645	32.9948	5.5656	5.38963	6.14857	5.5185	5.57408	5.69829	5.56835	5.17645	5.18288	5.3578	5.4821	4.83171	5.06481	5.42033
B5M07_01015	CP020694 (Chromosome)	223956	224450	-	lipopolysaccharide transport periplasmic protein LptA	17	7	10	19	24	55	29	10	33	78	50	93	89	72	17	65.1186	24.2978	32.3092	19.9851	27.2646	44.9078	40.0576	17.6534	39.8733	26.7032	22.8237	33.8507	20.4735	35.5568	13.6808	5.67474	4.69076	4.96066	4.49531	4.79537	5.30335	5.18214	4.38866	5.17818	4.77368	4.61879	5.01337	4.51121	5.06333
B5M07_01020	CP020694 (Chromosome)	224456	225064	-	LPS export ABC transporter periplasmic protein LptC	6	2	7	7	19	16	2	7	2	56	48	36	77	28	18	22.983	6.94222	22.6164	7.36294	21.5845	13.0641	2.76259	12.3574	2.41656	19.1715	21.9107	13.1035	17.713	13.8277	14.4855	4.2072	3.1902	4.19896	3.17169	4.17953	3.68634	2.50987	3.63379	2.41613	4.06912	4.20415	3.69001	3.99019	3.7421
B5M07_01025	CP020694 (Chromosome)	225071	226039	-	KpsF/GutQ family sugar-phosphate isomerase	0	0	4	10	5	12	7	4	11	73	51	45	113	46	12	0	0	12.9237	10.5185	5.68013	9.79807	9.66906	7.06137	13.2911	24.9915	23.2802	16.3793	25.9945	22.7169	9.657	2.17358	2.12547	3.59693	3.41555	2.88799	3.34928	3.34028	3.07957	3.63519	4.28434	4.20816	3.84938	4.32776	4.18202
B5M07_01030	CP020694 (Chromosome)	226036	226650	-	ribonuclease D	4	3	2	6	8	9	3	7	9	79	50	26	104	46	27	15.322	10.4133	6.46183	6.31109	9.08821	7.34855	4.14388	12.3574	10.8745	27.0456	22.8237	9.46362	23.9241	22.7169	21.7283	3.82334	3.49349	3.13759	3.04734	3.35575	3.16497	2.75986	3.63479	3.51678	4.424	4.24632	3.38115	4.29825	4.24096
B5M07_01035	CP020694 (Chromosome)	226706	227485	-	PaaX family transcriptional regulator	27	12	32	14	10	11	13	50	16	19	24	22	24	11	10	103.424	41.6533	103.389	14.7259	11.3603	8.98157	17.9568	88.2671	19.3325	6.50463	10.9554	8.00768	5.52095	5.43229	8.0475	6.01024	5.00383	6.01646	3.97108	3.73095	3.51358	4.16304	5.8526	4.23567	3.21075	3.68424	3.39432	3.06254	3.07209
B5M07_01040	CP020694 (Chromosome)	227475	229499	-	phenylacetic acid degradation bifunctional protein PaaZ	123	139	210	99	88	114	148	375	151	162	145	149	192	113	89	471.152	482.484	678.492	104.133	99.9703	93.0817	204.432	662.003	182.451	55.4605	66.1887	54.2338	44.1676	55.8045	71.6228	8.44198	8.46915	8.85479	6.83769	6.79705	6.72531	7.53465	8.82895	7.41452	6.22289	6.3913	6.20215	6.01161	6.22995
B5M07_01045	CP020694 (Chromosome)	229510	230574	-	phenylacetic acid degradation protein	128	86	64	29	16	23	27	122	67	68	53	82	77	67	44	490.305	298.516	206.779	30.5036	18.1764	18.7796	37.295	215.372	80.9549	23.2797	24.1931	29.8468	17.713	33.0876	35.409	8.19096	7.61864	7.20275	5.20344	4.73336	4.7535	5.3991	7.2545	6.18708	4.93893	4.97698	5.17555	4.6847	5.27674
B5M07_01050	CP020694 (Chromosome)	230582	231130	-	phenylacetate-CoA oxygenase subunit PaaJ	102	87	110	7	13	15	24	100	27	20	35	34	26	22	21	390.712	301.987	355.401	7.36294	14.7683	12.2476	33.1511	176.534	32.6236	6.84698	15.9766	12.3755	5.98103	10.8646	16.8998	7.77781	7.47722	7.66939	3.69872	4.27771	4.10235	5.05186	6.86461	5.03565	3.58367	4.33368	4.09498	3.46336	3.984
B5M07_01055	CP020694 (Chromosome)	231124	231882	-	phenylacetate-CoA oxygenase subunit PaaI	187	141	167	20	16	16	28	211	38	40	44	69	60	42	22	716.304	489.427	539.563	21.037	18.1764	13.0641	38.6763	372.487	45.9147	13.694	20.0848	25.115	13.8024	20.7415	17.7045	8.63187	8.18429	8.29951	4.83629	4.7082	4.41518	5.41524	7.87174	5.58542	4.43421	4.78102	4.98868	4.43616	4.81152
B5M07_01060	CP020694 (Chromosome)	231879	232223	-	1,2-phenylacetyl-CoA epoxidase subunit B	46	34	24	0	5	0	2	19	6	6	5	11	3	4	3	176.203	118.018	77.542	0	5.68013	0	2.76259	33.5415	7.24969	2.05409	2.28237	4.00384	0.690118	1.97538	2.41425	6.36138	5.87773	5.37502	1.03489	2.61341	0.90036	2.06903	4.43166	2.83579	1.72066	1.82179	2.27695	0.977823	1.72344
B5M07_01065	CP020694 (Chromosome)	232229	233221	-	1,2-phenylacetyl-CoA epoxidase subunit A	258	296	259	15	21	40	89	183	90	47	58	85	63	56	66	988.27	1027.45	836.807	15.7777	23.8566	32.6602	122.935	323.058	108.745	16.0904	26.4755	30.9388	14.4925	27.6553	53.1135	9.13147	9.17793	8.93671	4.82836	5.17598	5.45284	6.78161	7.84208	6.65199	4.81469	5.25405	5.39591	4.72221	5.29452
B5M07_01070	CP020694 (Chromosome)	233250	234455	-	3-oxoadipyl-CoA thiolase	192	267	163	10	12	10	43	215	30	13	21	28	36	22	13	735.457	926.787	526.639	10.5185	13.6323	8.16506	59.3957	379.549	36.2485	4.45054	9.58595	10.1916	8.28142	10.8646	10.4618	8.59415	8.87273	8.19719	4.08747	4.30776	3.87179	5.73676	7.81606	5.22704	3.37059	3.97689	4.02333	3.83789	4.08553
B5M07_01075	CP020694 (Chromosome)	234663	236210	+	alkaline phosphatase	0	0	0	0	0	0	1	0	0	0	0	4	0	0	2	0	0	0	0	0	0	1.38129	0	0	0	0	1.45594	0	0	1.6095	-1.27287	-1.29368	-1.30882	-1.54583	-1.52957	-1.59932	-1.06589	-1.43647	-1.51655	-1.68522	-1.67121	-0.892975	-1.70081	-1.66696
B5M07_01080	CP020694 (Chromosome)	236270	236875	-	cob(I)yrinic acid a,c-diamide adenosyltransferase	6	0	1	3	5	8	8	3	11	51	51	51	95	45	14	22.983	0	3.23092	3.15555	5.68013	6.53205	11.0504	5.29603	13.2911	17.4598	23.2802	18.5633	21.8537	22.223	11.2665	4.11089	2.07806	2.61016	2.42899	2.85742	2.96157	3.43385	2.82906	3.60914	3.89089	4.18553	3.95309	4.12395	4.1364
B5M07_01085	CP020694 (Chromosome)	236946	237884	-	EamA family transporter	3	1	6	7	14	14	14	5	6	101	54	66	81	70	64	11.4915	3.47111	19.3855	7.36294	15.9044	11.4311	19.3381	8.82671	7.24969	34.5772	24.6496	24.023	18.6332	34.5691	51.504	3.74759	3.00739	4.19913	3.32891	4.01481	3.70342	4.20359	3.50019	3.32316	4.80721	4.45318	4.42756	4.17083	4.80513
B5M07_01090	CP020694 (Chromosome)	237895	239004	-	chorismate synthase	9	5	2	8	14	24	18	11	5	140	57	41	224	45	30	34.4745	17.3556	6.46183	8.41479	15.9044	19.5961	24.8633	19.4188	6.04141	47.9288	26.019	14.9234	51.5288	22.223	24.1425	4.84236	4.18677	3.43375	3.53059	4.09608	4.29585	4.53017	4.28733	3.28109	5.22318	4.58102	4.02948	5.30254	4.42118
B5M07_01095	CP020694 (Chromosome)	239233	240210	+	thiamine ABC transporter substrate binding subunit	2	5	0	4	2	7	4	8	8	63	22	30	60	18	6	7.66101	17.3556	0	4.2074	2.27205	5.71554	5.52518	14.1227	9.66626	21.568	10.0424	10.9196	13.8024	8.88921	4.8285	2.9567	3.68243	1.80005	2.46161	2.06477	2.69722	2.68215	3.5152	3.16311	3.97886	3.20702	3.28931	3.52379	3.0906
B5M07_01100	CP020694 (Chromosome)	240186	241742	+	thiamine/thiamine pyrophosphate ABC transporter permease ThiP	2	3	1	2	10	4	0	1	5	61	40	47	68	14	8	7.66101	10.4133	3.23092	2.1037	11.3603	3.26602	0	1.76534	6.04141	20.8833	18.259	17.1073	15.6427	6.91383	6.438	2.87242	3.13101	2.30787	1.92235	3.25305	2.18302	1.28686	1.92092	2.6781	3.89256	3.74881	3.68393	3.59551	2.79331
B5M07_01105	CP020694 (Chromosome)	241729	242421	+	thiamine ABC transporter ATP-binding protein	0	1	2	4	0	0	2	1	1	23	6	26	28	7	4	0	3.47111	6.46183	4.2074	0	0	2.76259	1.76534	1.20828	7.87402	2.73884	9.46362	6.4411	3.45691	3.219	0.913565	1.64591	2.10591	1.82837	0.471405	0.35051	1.50755	1.25323	1.03659	2.42533	1.49569	2.6025	2.24101	1.68082
B5M07_01110	CP020694 (Chromosome)	242418	242900	-	riboflavin synthase subunit beta	3	1	2	6	5	2	3	4	1	15	14	13	5	4	1	11.4915	3.47111	6.46183	6.31109	5.68013	1.63301	4.14388	7.06137	1.20828	5.13523	6.39063	4.73181	1.1502	1.97538	0.80475	2.79687	1.86357	2.30249	2.34611	2.2504	1.33839	1.98555	2.42271	1.2349	2.18237	2.37793	2.10918	1.04053	1.4254
B5M07_01115	CP020694 (Chromosome)	243173	243787	+	negative transcriptional regulator	0	0	2	0	5	8	3	1	2	26	16	25	44	22	3	0	0	6.46183	0	5.68013	6.53205	4.14388	1.76534	2.41656	8.90107	7.30358	9.09964	10.1217	10.8646	2.41425	1.30496	1.26666	2.40142	0.778874	2.33492	2.46571	2.07603	1.56354	1.69709	2.77231	2.57941	2.79287	2.90243	2.96148
B5M07_01120	CP020694 (Chromosome)	243848	244456	+	glutathione S-transferase	1	1	4	12	2	7	0	0	3	31	19	17	45	16	7	3.83051	3.47111	12.9237	12.6222	2.27205	5.71554	0	0	3.62485	10.6128	8.673	6.18775	10.3518	7.90152	5.63325	2.20293	2.14144	3.16067	3.20701	1.79642	2.47003	1.06496	1.17236	2.10961	3.0586	2.85881	2.54457	3.03765	2.76928
B5M07_01125	CP020694 (Chromosome)	244647	245207	+	ubiquinol-cytochrome c reductase iron-sulfur subunit	3	16	21	35	22	142	73	9	20	116	69	77	252	64	48	11.4915	55.5378	67.8492	36.8147	24.9926	115.944	100.835	15.8881	24.1656	39.7125	31.4967	28.0269	57.9699	31.6061	38.628	4.25897	5.63715	5.8464	5.22508	4.84728	6.43877	6.28209	4.44874	4.81611	5.3015	5.06824	4.95239	5.69399	5.07182
B5M07_01130	CP020694 (Chromosome)	245223	246566	+	cytochrome b	57	81	103	328	362	1139	696	103	225	1154	857	933	1465	583	470	218.339	281.16	332.784	345.007	411.241	930	961.381	181.83	271.863	395.071	391.198	339.598	337.008	287.912	378.233	7.99506	8.24588	8.41715	8.45397	8.63651	9.5144	9.55066	7.81451	8.21071	8.59468	8.58439	8.43759	8.42968	8.26846
B5M07_01135	CP020694 (Chromosome)	246572	247972	+	hypothetical protein	125	119	189	767	556	2595	855	408	582	2559	2055	2383	2776	1332	875	478.813	413.062	610.643	806.768	631.631	2118.83	1181.01	720.26	703.22	876.071	938.054	867.377	638.589	657.801	704.156	9.10345	8.95804	9.34757	9.63448	9.38164	10.6752	10.0376	9.51669	9.49194	9.7208	9.79277	9.71033	9.39271	9.42315
B5M07_01140	CP020694 (Chromosome)	248226	249479	-	tRNA (N(6)-L-threonylcarbamoyladenosine(37)-C(2))- methylthiotransferase MtaB	2	1	1	31	44	46	10	17	15	61	59	139	80	40	35	7.66101	3.47111	3.23092	32.6073	49.9852	37.5593	13.8129	30.0108	18.1242	20.8833	26.932	50.594	18.4032	19.7538	28.1663	3.59061	3.16025	3.11236	4.82771	5.27747	4.97708	3.98961	4.73743	4.24115	4.37845	4.63513	5.29858	4.25272	4.32327
B5M07_01145	CP020694 (Chromosome)	249476	250309	-	diaminopimelate epimerase	1	13	1	16	19	34	1	12	15	30	15	34	102	25	15	3.83051	45.1244	3.23092	16.8296	21.5845	27.7612	1.38129	21.1841	18.1242	10.2705	6.84711	12.3755	23.464	12.3461	12.0713	2.88435	4.9385	2.77073	3.94833	4.19706	4.46187	2.22099	4.17036	4.02039	3.47199	3.10517	3.65056	4.29509	3.6485
B5M07_01150	CP020694 (Chromosome)	250414	250489	+	#N/A	0	0	0	0	0	0	0	0	0	0	1	2	0	0	0	0	0	0	0	0	0	0	0	0	0	0.456474	0.727971	0	0	0	-1.83281	-1.84088	-1.84675	-1.9387	-1.93239	-1.95945	-1.91638	-1.89628	-1.92734	-2.00295	-1.85477	-1.77648	-2.00503	-2.00034
B5M07_01155	CP020694 (Chromosome)	250552	251400	-	polyamine ABC transporter permease	5	10	5	204	168	228	103	18	94	207	228	164	463	370	226	19.1525	34.7111	16.1546	214.577	190.852	186.163	142.273	31.7762	113.578	70.8662	104.076	59.6936	106.508	182.723	181.874	5.11496	5.57984	4.97751	7.40657	7.27825	7.25196	6.96089	5.48058	6.72284	6.23695	6.63223	6.0649	6.65663	7.23247
B5M07_01160	CP020694 (Chromosome)	251405	252634	-	ABC transporter permease	17	19	20	301	194	262	69	27	203	245	197	262	583	573	374	65.1186	65.9511	64.6183	316.607	220.389	213.925	95.3094	47.6642	245.281	83.8755	89.9253	95.3642	134.113	282.973	300.977	6.34876	6.35873	6.33851	7.97229	7.57836	7.54687	6.70787	6.04953	7.69358	6.57832	6.64797	6.70665	7.05489	7.85015
B5M07_01165	CP020694 (Chromosome)	252695	253738	-	spermidine/putrescine ABC transporter substrate-binding protein	77	60	59	2060	1721	2327	912	220	915	617	528	764	1908	1778	688	294.949	208.267	190.624	2166.81	1955.1	1900.01	1259.74	388.375	1105.58	211.229	241.018	278.085	438.915	878.056	553.668	8.49662	8.1664	8.08447	10.6081	10.4924	10.4605	10.0048	8.76622	9.86235	8.17222	8.29747	8.43515	8.88907	9.61382
B5M07_01170	CP020694 (Chromosome)	253799	254890	-	Fe3+/spermidine/putrescine ABC transporter ATP-binding protein	12	30	14	164	120	118	60	7	78	448	445	429	1191	951	557	45.9661	104.133	45.2328	172.503	136.323	96.3477	82.8777	12.3574	94.246	153.372	203.131	156.15	273.977	469.646	448.246	6.01333	6.78025	5.99344	7.30139	7.05447	6.69915	6.55	4.96806	6.67758	7.17808	7.47629	7.19694	7.8006	8.39802
B5M07_01175	CP020694 (Chromosome)	255144	256226	+	N-acyl homoserine lactone synthase	4	7	3	5	17	15	8	18	12	10	38	60	84	70	60	15.322	24.2978	9.69275	5.25925	19.3124	12.2476	11.0504	31.7762	14.4994	3.42349	17.346	21.8391	19.3233	34.5691	48.285	3.97476	4.40445	3.5948	3.05663	4.19397	3.7571	3.67136	4.69322	3.91762	2.67069	4.09005	4.32165	4.19859	4.79685
B5M07_01180	CP020694 (Chromosome)	256356	256535	+	hypothetical protein	0	0	0	0	0	0	0	0	0	0	0	0	0	0	1	0	0	0	0	0	0	0	0	0	0	0	0	0	0	0.80475	-2.14196	-2.14775	-2.15197	-2.21795	-2.21342	-2.23284	-2.20193	-2.18751	-2.2098	-2.27363	-2.26703	-2.27342	-2.27477	-2.2624
B5M07_01185	CP020694 (Chromosome)	256611	257006	+	hypothetical protein	2	0	0	0	1	9	3	0	0	1	3	3	2	1	4	7.66101	0	0	0	1.13603	7.34855	4.14388	0	0	0.342349	1.36942	1.09196	0.460079	0.493845	3.219	1.50288	0.040953	0.0118627	-0.384631	0.26509	1.73875	1.14689	-0.233333	-0.345449	-0.306598	0.373665	0.230778	-0.229601	-0.144162
B5M07_01190	CP020694 (Chromosome)	257280	258464	+	integrase	6	6	15	29	13	36	28	13	29	124	81	128	201	104	74	22.983	20.8267	48.4637	30.5036	14.7683	29.3942	38.6763	22.9494	35.0402	42.4513	36.9744	46.5901	46.2379	51.3599	59.5515	4.73577	4.64695	5.4474	4.98699	4.31277	4.94987	5.22388	4.71792	5.12483	5.32119	5.17948	5.41743	5.41003	5.51855
B5M07_01195	CP020694 (Chromosome)	259276	259452	+	hypothetical protein	0	0	0	0	0	0	0	2	0	1	0	0	1	0	2	0	0	0	0	0	0	0	3.53068	0	0.342349	0	0	0.230039	0	1.6095	-1.23665	-1.26048	-1.27783	-1.54929	-1.53067	-1.61056	-1.48338	-0.456429	-1.51575	-1.41452	-1.69973	-1.71571	-1.51036	-1.69377
B5M07_01200	CP020694 (Chromosome)	260289	260609	+	hypothetical protein	6	3	0	0	0	0	1	0	0	5	2	5	1	3	1	22.983	10.4133	0	0	0	0	1.38129	0	0	1.71174	0.912948	1.81993	0.230039	1.48153	0.80475	2.85402	1.92431	-0.0493896	-0.493689	-0.468014	-0.57939	0.334706	-0.310853	-0.447616	0.526685	0.0786134	0.574572	-0.618458	0.406789
B5M07_01210	CP020694 (Chromosome)	261427	261756	-	QacE family quaternary ammonium compound efflux SMR transporter	0	0	0	0	0	0	0	0	0	0	0	0	0	0	0	0	0	0	0	0	0	0	0	0	0	0	0	0	0	0	0	0	0	0	0	0	0	0	0	0	0	0	0	0
B5M07_01215	CP020694 (Chromosome)	261789	263492	-	transposase	0	0	0	0	0	0	0	0	0	0	0	0	0	0	0	0	0	0	0	0	0	0	0	0	0	0	0	0	0	0	0	0	0	0	0	0	0	0	0	0	0	0	0	0
B5M07_01220	CP020694 (Chromosome)	263562	263909	-	transposase	0	0	0	0	0	0	0	0	0	0	0	0	0	0	0	0	0	0	0	0	0	0	0	0	0	0	0	0	0	0	0	0	0	0	0	0	0	0	0	0	0	0	0	0
B5M07_01225	CP020694 (Chromosome)	263906	264271	-	transposase	0	0	0	0	0	0	0	0	0	0	0	0	0	0	0	0	0	0	0	0	0	0	0	0	0	0	0	0	0	0	0	0	0	0	0	0	0	0	0	0	0	0	0	0
B5M07_01230	CP020694 (Chromosome)	265176	265604	-	hypothetical protein	0	3	6	19	8	14	12	2	2	82	94	89	179	60	34	0	10.4133	19.3855	19.9851	9.08821	11.4311	16.5755	3.53068	2.41656	28.0726	42.9085	32.3947	41.1771	29.6307	27.3615	2.47648	3.62235	4.16284	4.20536	3.46769	3.66712	4.02024	2.82333	2.5532	4.56014	5.00968	4.7105	4.96844	4.61489
B5M07_01235	CP020694 (Chromosome)	265610	266113	-	hypothetical protein	42	44	59	118	230	334	166	83	143	923	538	593	1496	562	547	160.881	152.729	190.624	124.118	261.286	272.713	229.295	146.523	172.784	315.988	245.583	215.843	344.139	277.541	440.198	7.47379	7.42191	7.64337	7.21407	7.96831	8.01334	7.83224	7.37847	7.54271	8.16932	7.90371	7.76969	8.26039	8.03195
B5M07_01240	CP020694 (Chromosome)	266113	266913	-	hypothetical protein	26	46	44	141	184	278	92	53	152	951	803	693	1950	905	511	99.5931	159.671	142.16	148.311	209.029	226.989	127.079	93.5631	183.659	325.574	366.548	252.242	448.577	446.93	411.227	6.99553	7.44921	7.334	7.37277	7.72122	7.80655	7.22062	6.92928	7.58858	8.18696	8.31393	7.9168	8.53265	8.52838
B5M07_01245	CP020694 (Chromosome)	267151	267236	-	#N/A	1	0	0	1	0	0	0	2	4	37	5	10	77	4	4	3.83051	0	0	1.05185	0	0	0	3.53068	4.83313	12.6669	2.28237	3.63986	17.713	1.97538	3.219	1.55062	0.691656	0.659686	0.80058	0.276295	0.151777	0.350068	1.5475	1.8292	2.82443	1.23691	1.62196	3.18319	1.13008
B5M07_01250	CP020694 (Chromosome)	267405	268391	+	complex I NDUFA9 subunit family protein	4	4	11	30	25	40	30	21	43	187	71	165	330	123	116	15.322	13.8844	35.5401	31.5555	28.4007	32.6602	41.4388	37.0722	51.9561	64.0192	32.4096	60.0576	75.913	60.7429	93.351	4.49531	4.41312	5.21596	5.0946	4.9929	5.12748	5.36534	5.25463	5.59609	5.81719	5.11855	5.74978	5.99895	5.76122
B5M07_01255	CP020694 (Chromosome)	268391	269197	+	undecaprenyl-diphosphatase	10	7	3	48	34	32	21	10	15	128	84	127	142	100	52	38.3051	24.2978	9.69275	50.4888	38.6249	26.1282	29.0072	17.6534	18.1242	43.8207	38.3438	46.2262	32.6656	49.3845	41.847	5.16824	4.73602	3.9971	5.46114	5.18387	4.79312	4.89701	4.43377	4.44947	5.31673	5.17832	5.37233	5.01511	5.44088
B5M07_01260	CP020694 (Chromosome)	269357	270790	+	dihydropyrimidine dehydrogenase	66	73	71	259	465	684	93	44	68	76	59	99	239	129	233	252.813	253.391	229.395	272.429	528.252	558.49	128.46	77.6751	82.1632	26.0185	26.932	36.0346	54.9794	63.706	187.507	7.70904	7.71212	7.60495	7.79516	8.53185	8.59547	6.99506	6.48959	6.54312	5.47341	5.50553	5.75816	6.14829	6.29154
B5M07_01265	CP020694 (Chromosome)	270723	271265	+	hypothetical protein	34	16	22	113	163	286	38	22	42	27	13	20	34	51	117	130.237	55.5378	71.0802	118.859	185.172	233.521	52.4892	38.8375	50.7478	9.24342	5.93416	7.27971	7.82134	25.1861	94.1558	6.60629	5.69992	5.95588	6.51966	7.01296	7.27737	5.64616	5.34181	5.61173	4.01115	3.6801	3.82278	3.86709	4.91249
B5M07_01270	CP020694 (Chromosome)	271352	271696	+	aldehyde-activating protein	1	0	1	6	22	39	1	6	0	4	3	3	2	13	23	3.83051	0	3.23092	6.31109	24.9926	31.8437	1.38129	10.5921	0	1.3694	1.36942	1.09196	0.460079	6.41998	18.5093	1.97845	1.17226	1.87138	2.40605	3.82691	4.11089	1.33287	2.88062	0.709062	1.16166	1.18543	1.02562	0.532405	2.44047
B5M07_01275	CP020694 (Chromosome)	271693	276225	+	glutamate synthase large subunit	228	196	259	1210	1237	2205	724	636	699	537	370	638	1104	1908	3046	873.355	680.338	836.807	1272.74	1405.26	1800.4	1000.06	1122.76	844.589	183.841	168.895	232.223	253.964	942.256	2451.27	9.70157	9.44157	9.65675	10.1037	10.211	10.4825	9.84517	9.96861	9.66665	8.17514	8.10098	8.38643	8.46909	9.78215
B5M07_01280	CP020694 (Chromosome)	276343	277047	+	GDSL family lipase	12	3	12	53	69	90	23	32	32	33	37	45	22	23	35	45.9661	10.4133	38.771	55.748	78.3858	73.4855	31.7698	56.491	38.665	11.2975	16.8895	16.3793	5.06087	11.3584	28.1663	5.2884	3.96269	5.11763	5.51042	5.87856	5.81062	4.92346	5.51922	5.12467	3.92627	4.3014	4.27087	3.2444	3.93645
B5M07_01285	CP020694 (Chromosome)	277055	277783	+	monofunctional biosynthetic peptidoglycan transglycosylase	15	8	11	29	30	54	23	41	18	86	43	94	95	69	29	57.4576	27.7689	35.5401	30.5036	34.0808	44.0913	31.7698	72.379	21.7491	29.442	19.6284	34.2146	21.8537	34.0753	23.3378	5.58293	4.87587	5.10962	4.96052	5.07036	5.33111	5.00073	5.82624	4.64403	4.92461	4.54709	5.07488	4.6402	5.07066
B5M07_01290	CP020694 (Chromosome)	277842	278510	+	glutathione S-transferase	5	3	0	14	21	35	10	6	17	117	115	128	201	72	31	19.1525	10.4133	0	14.7259	23.8566	28.5777	13.8129	10.5921	20.5408	40.0548	52.4945	46.5901	46.2379	35.5568	24.9473	4.33222	3.83004	2.68763	4.07492	4.53805	4.72086	4.02118	3.8003	4.39118	5.07488	5.36222	5.23518	5.22834	4.94852
B5M07_01295	CP020694 (Chromosome)	278510	279574	+	tRNA epoxyqueuosine(34) reductase QueG	1	0	1	17	25	25	9	14	7	58	69	71	93	47	17	3.83051	0	3.23092	17.8814	28.4007	20.4126	12.4317	24.7148	8.45797	19.8562	31.4967	25.843	21.3937	23.2107	13.6808	2.9816	2.38552	2.86793	4.06897	4.5368	4.20244	3.72301	4.38636	3.38117	4.17845	4.65416	4.44842	4.25531	4.3361
B5M07_01300	CP020694 (Chromosome)	279586	281592	+	hydantoinase	13	5	9	37	31	59	43	23	48	95	78	97	184	62	42	49.7966	17.3556	29.0782	38.9184	35.2168	48.1739	59.3957	40.6029	57.9975	32.5231	35.605	35.3066	42.3273	30.6184	33.7995	5.51331	4.54492	4.99127	5.27015	5.17016	5.48814	5.70376	5.31226	5.67957	5.08948	5.18044	5.17188	5.3563	5.02993
B5M07_01305	CP020694 (Chromosome)	281622	282131	-	peptide-methionine (S)-S-oxide reductase	0	3	2	35	24	44	7	6	13	59	67	124	115	59	43	0	10.4133	6.46183	36.8147	27.2646	35.9263	9.66906	10.5921	15.7077	20.1986	30.5837	45.1342	26.4545	29.1368	34.6043	2.67016	3.75389	3.41892	4.92676	4.61532	4.90343	3.64498	3.73112	4.07438	4.31649	4.73865	5.15028	4.59052	4.68814
B5M07_01310	CP020694 (Chromosome)	282128	282577	-	peptide-methionine (R)-S-oxide reductase	0	4	1	9	12	33	4	2	3	47	37	80	68	46	22	0	13.8844	3.23092	9.46664	13.6323	26.9447	5.52518	3.53068	3.62485	16.0904	16.8895	29.1188	15.6427	22.7169	17.7045	2.1808	3.66555	2.65578	3.32416	3.66515	4.35985	2.88182	2.60129	2.5723	3.83665	3.88406	4.45038	3.80959	4.18719
B5M07_01315	CP020694 (Chromosome)	282657	283526	-	EamA family transporter	2	3	1	3	4	7	4	12	1	28	20	24	58	66	19	7.66101	10.4133	3.23092	3.15555	4.5441	5.71554	5.52518	21.1841	1.20828	9.58577	9.12948	8.73565	13.3423	32.5938	15.2903	2.98966	3.23867	2.43931	2.28526	2.55041	2.72309	2.70992	3.95214	1.81269	3.18853	3.14123	3.09979	3.51508	4.44063
B5M07_01320	CP020694 (Chromosome)	283966	284253	-	DNA-binding protein	9	2	6	22	29	38	25	14	12	217	220	171	307	128	92	34.4745	6.94222	19.3855	23.1407	32.9448	31.0272	34.5324	24.7148	14.4994	74.2897	100.424	62.2415	70.6221	63.2121	74.037	5.14896	3.91282	4.62621	4.75833	5.10051	5.04037	5.14753	4.82667	4.33886	5.94499	6.27114	5.75606	5.89132	5.77185
B5M07_01325	CP020694 (Chromosome)	284381	285844	-	AMP nucleosidase	17	13	23	134	119	189	82	57	136	643	586	645	704	421	261	65.1186	45.1244	74.3111	140.948	135.187	154.32	113.266	100.625	164.326	220.13	267.494	234.771	161.948	207.909	210.04	6.38393	6.05658	6.50383	7.13487	7.0919	7.22884	6.9118	6.79372	7.29417	7.6042	7.81388	7.67321	7.27946	7.54304
B5M07_01330	CP020694 (Chromosome)	285841	287643	-	adenine deaminase	20	25	15	93	76	89	80	50	79	488	469	483	657	336	204	76.6101	86.7778	48.4637	97.822	86.338	72.669	110.504	88.2671	95.4543	167.066	214.086	175.805	151.136	165.932	164.169	6.43134	6.55215	6.00239	6.66927	6.5434	6.37135	6.79379	6.56649	6.64457	7.22676	7.4924	7.28105	7.12067	7.2193
B5M07_01335	CP020694 (Chromosome)	287767	289011	+	glycosyl transferase family 1	18	15	22	17	12	12	14	38	31	117	80	111	211	123	63	68.9491	52.0667	71.0802	17.8814	13.6323	9.79807	19.3381	67.083	37.4567	40.0548	36.5179	40.4024	48.5383	60.7429	50.6993	5.84237	5.55227	5.87765	4.51516	4.27901	3.99285	4.59162	5.82388	5.22375	5.29222	5.19811	5.30104	5.49072	5.72502
B5M07_01340	CP020694 (Chromosome)	289018	290136	-	polysaccharide biosynthesis protein	8	11	10	62	37	55	54	22	35	379	226	259	520	295	116	30.644	38.1822	32.3092	65.2146	42.033	44.9078	74.5899	38.8375	42.2899	129.75	103.163	94.2722	119.621	145.684	93.351	5.31963	5.51189	5.35977	6.02573	5.58859	5.65159	6.16332	5.5166	5.59487	6.75094	6.505	6.4097	6.66382	6.87576
B5M07_01345	CP020694 (Chromosome)	290280	291173	+	hypothetical protein	12	4	8	10	16	6	11	22	7	56	37	41	73	34	17	45.9661	13.8844	25.8473	10.5185	18.1764	4.89904	15.1942	38.8375	8.45797	19.1715	16.8895	14.9234	16.7929	16.7907	13.6808	5.06163	3.89455	4.47198	3.62803	4.13908	2.99516	3.96734	4.90769	3.44431	4.19444	4.06829	3.94706	4.06275	4.06249
B5M07_01350	CP020694 (Chromosome)	291184	291795	+	sugar transferase	1	1	0	6	6	7	6	1	2	23	28	41	59	22	5	3.83051	3.47111	0	6.31109	6.81616	5.71554	8.28777	1.76534	2.41656	7.87402	12.7813	14.9234	13.5723	10.8646	4.02375	2.31516	2.25305	1.56788	2.63659	2.70308	2.55117	2.87412	1.8296	1.93743	2.84287	3.31009	3.46894	3.37708	3.14849
B5M07_01355	CP020694 (Chromosome)	292038	293921	+	nucleotide sugar epimerase	286	212	146	249	217	239	662	482	826	668	537	525	1270	823	528	1095.52	735.876	471.714	261.91	246.518	195.145	914.417	850.895	998.041	228.689	245.126	191.092	292.15	406.434	424.908	9.74364	9.31011	8.8381	8.23816	8.17848	7.9518	9.5468	9.46817	9.64262	8.10393	8.17212	7.93092	8.3465	8.68342
B5M07_01360	CP020694 (Chromosome)	294108	296243	+	hypothetical protein	41	62	30	199	192	224	233	109	251	959	593	903	1909	1310	684	157.051	215.209	96.9275	209.318	218.117	182.897	321.842	192.422	303.279	328.313	270.689	328.679	439.145	646.937	550.449	7.5325	7.84375	7.08099	7.81423	7.85606	7.67821	8.2582	7.73001	8.19601	8.27949	8.07771	8.28065	8.589	9.00946
B5M07_01365	CP020694 (Chromosome)	296222	296938	+	hypothetical protein	19	11	7	87	92	109	112	57	132	484	413	474	728	438	232	72.7796	38.1822	22.6164	91.5109	104.514	88.9991	154.705	100.625	159.493	165.697	188.524	172.529	167.469	216.304	186.702	6.3901	5.80351	5.38373	6.60934	6.74414	6.58097	7.15102	6.70594	7.18341	7.22496	7.36253	7.26793	7.23642	7.51047
B5M07_01370	CP020694 (Chromosome)	296990	297844	+	NAD(P)-dependent oxidoreductase	9	2	4	17	16	17	19	26	28	182	102	128	149	58	31	34.4745	6.94222	12.9237	17.8814	18.1764	13.8806	26.2446	45.8989	33.8319	62.3075	46.5603	46.5901	34.2759	28.643	24.9473	4.99308	3.69842	4.11562	4.36021	4.3764	4.12395	4.72944	5.29482	4.98346	5.63004	5.31842	5.31972	5.00038	4.81665
B5M07_01375	CP020694 (Chromosome)	297871	298467	+	exopolysaccharide synthesis protein	10	13	13	94	125	156	18	10	17	24	27	19	31	22	5	38.3051	45.1244	42.0019	98.8738	142.003	127.375	24.8633	17.6534	20.5408	8.21637	12.3248	6.91572	7.13122	10.8646	4.02375	5.05112	5.22325	5.15017	6.09978	6.50869	6.38751	4.62648	4.29858	4.43885	3.57694	3.94567	3.43113	3.44714	3.83151
B5M07_01380	CP020694 (Chromosome)	298464	300392	-	1-deoxy-D-xylulose-5-phosphate synthase	3	5	5	24	44	59	21	14	12	157	123	151	238	80	63	11.4915	17.3556	16.1546	25.2444	49.9852	48.1739	29.0072	24.7148	14.4994	53.7488	56.1463	54.9618	54.7494	39.5076	50.6993	4.15999	4.46715	4.40453	4.7808	5.46874	5.43171	4.91711	4.76447	4.27211	5.5489	5.59441	5.57236	5.56899	5.22764
B5M07_01385	CP020694 (Chromosome)	300434	301318	-	farnesyl-diphosphate synthase	1	3	4	21	6	5	8	2	13	60	33	40	77	28	11	3.83051	10.4133	12.9237	22.0888	6.81616	4.08253	11.0504	3.53068	15.7077	20.5409	15.0636	14.5594	17.713	13.8277	8.85225	2.76876	3.41455	3.59963	4.14364	3.04022	2.62541	3.46408	2.60365	3.79887	4.08084	3.76582	3.73301	3.93133	3.68098
B5M07_01390	CP020694 (Chromosome)	301327	301569	-	exodeoxyribonuclease VII small subunit	0	0	0	1	0	0	0	0	0	2	0	2	6	0	3	0	0	0	1.05185	0	0	0	0	0	0.684698	0	0.727971	1.38024	0	2.41425	-0.882189	-0.907134	-0.92529	-0.725524	-1.18993	-1.27089	-1.14044	-1.07832	-1.17432	-0.864764	-1.3195	-0.842394	-0.539082	-1.31362
B5M07_01395	CP020694 (Chromosome)	301679	302380	-	DNA-binding response regulator	5	11	12	11	16	32	28	14	38	62	35	47	90	38	22	19.1525	38.1822	38.771	11.5703	18.1764	26.1282	38.6763	24.7148	45.9147	21.2256	15.9766	17.1073	20.7035	18.7661	17.7045	4.36253	5.02328	5.04059	3.88885	4.30058	4.65417	5.05141	4.59734	5.23234	4.4474	4.17228	4.23681	4.42247	4.32726
B5M07_01400	CP020694 (Chromosome)	302377	302889	-	MarR family transcriptional regulator	16	22	19	28	13	16	30	35	44	60	49	25	99	38	17	61.2881	76.3645	61.3874	29.4518	14.7683	13.0641	41.4388	61.787	53.1644	20.5409	22.3672	9.09964	22.7739	18.7661	13.6808	5.60928	5.8485	5.61527	4.8681	4.21221	4.09534	5.2145	5.63277	5.47655	4.51035	4.59439	3.76227	4.61088	4.42453
B5M07_01405	CP020694 (Chromosome)	303061	303930	+	branched-chain amino acid aminotransferase	3	15	18	48	25	78	49	18	49	48	26	24	62	6	9	11.4915	52.0667	58.1565	50.4888	28.4007	63.6875	67.6835	31.7762	59.2058	16.4327	11.8683	8.73565	14.2624	2.96307	7.24275	3.96085	5.36393	5.48435	5.3519	4.75187	5.60472	5.66583	4.86308	5.52189	4.20979	3.90574	3.62794	4.07235	2.82143
B5M07_01410	CP020694 (Chromosome)	303927	304694	-	hypothetical protein	3	3	1	8	10	17	17	12	9	41	40	54	52	58	26	11.4915	10.4133	3.23092	8.41479	11.3603	13.8806	23.482	21.1841	10.8745	14.0363	18.259	19.6552	11.9621	28.643	20.9235	3.65092	3.5694	2.84739	3.35487	3.62065	3.80592	4.31959	4.21222	3.58192	3.81639	4.07538	4.15016	3.66163	4.53505
B5M07_01415	CP020694 (Chromosome)	304691	305722	-	urea amidolyase	6	4	7	28	19	33	48	30	24	108	83	84	209	86	70	22.983	13.8844	22.6164	29.4518	21.5845	26.9447	66.3022	52.9603	28.9988	36.9737	37.8873	30.5748	48.0782	42.4707	56.3325	4.72144	4.30236	4.70276	4.94019	4.64173	4.85216	5.77249	5.53368	4.92537	5.16813	5.19287	4.97597	5.43977	5.31002
B5M07_01420	CP020694 (Chromosome)	305719	306447	-	allophanate hydrolase	3	8	2	20	17	25	16	19	8	82	74	65	131	64	42	11.4915	27.7689	6.46183	21.037	19.3124	20.4126	22.1007	33.5415	9.66626	28.0726	33.7791	23.6591	30.1352	31.6061	33.7995	3.91592	4.68184	3.50858	4.41673	4.33424	4.38701	4.46491	4.87987	3.71322	4.70641	4.89619	4.53312	4.7797	4.82719
B5M07_01425	CP020694 (Chromosome)	306440	307372	-	hypothetical protein	9	11	5	23	12	24	22	21	33	94	65	104	147	73	53	34.4745	38.1822	16.1546	24.1925	13.6323	19.5961	30.3885	37.0722	39.8733	32.1808	29.6708	37.8545	33.8158	36.0507	42.6518	5.03812	5.13974	4.34994	4.69341	4.16632	4.49027	4.91734	5.11566	5.19183	4.97566	4.89359	5.14161	5.02629	5.09107
B5M07_01430	CP020694 (Chromosome)	307382	308698	-	C4-dicarboxylate ABC transporter permease	13	12	20	27	30	33	35	26	25	210	180	209	333	195	107	49.7966	41.6533	64.6183	28.3999	34.0808	26.9447	48.3453	45.8989	30.207	71.8933	82.1653	76.073	76.6031	96.2997	86.1083	5.66877	5.49589	5.9293	5.12011	5.29359	5.06832	5.63741	5.58626	5.17949	6.04548	6.18582	6.10478	6.11247	6.35453
B5M07_01435	CP020694 (Chromosome)	308703	309227	-	ABC transporter substrate-binding protein	3	0	1	10	21	8	1	7	23	70	30	52	95	61	20	11.4915	0	3.23092	10.5185	23.8566	6.53205	1.38129	12.3574	27.7905	23.9644	13.6942	18.9272	21.8537	30.1245	16.095	3.56083	2.22048	2.73015	3.47273	4.27402	3.04974	2.17908	3.62241	4.43181	4.29093	3.72293	4.04748	4.19693	4.52888
B5M07_01440	CP020694 (Chromosome)	309304	310293	-	C4-dicarboxylate ABC transporter substrate-binding protein	33	21	33	160	148	177	102	59	117	280	260	259	362	258	96	126.407	72.8933	106.62	168.296	168.132	144.522	140.892	104.155	141.369	95.8577	118.683	94.2722	83.2743	127.412	77.256	6.94051	6.39391	6.76728	7.24244	7.24129	7.08168	7.05452	6.74297	7.0582	6.65763	6.87661	6.64074	6.51562	6.95021
B5M07_01445	CP020694 (Chromosome)	310332	311573	-	FAD-binding oxidoreductase	18	14	13	17	6	10	9	10	5	211	113	124	135	78	47	68.9491	48.5956	42.0019	17.8814	6.81616	8.16506	12.4317	17.6534	6.04141	72.2356	51.5815	45.1342	31.0553	38.5199	37.8233	5.71019	5.34101	5.19168	4.35496	3.54337	3.66235	4.03397	4.35094	3.46236	5.78925	5.42523	5.28428	4.89606	5.1174
B5M07_01450	CP020694 (Chromosome)	311737	312432	+	hypothetical protein	4	8	8	19	14	10	22	25	24	22	19	16	24	3	5	15.322	27.7689	25.8473	19.9851	15.9044	8.16506	30.3885	44.1336	28.9988	7.53168	8.673	5.82377	5.52095	1.48153	4.02375	3.82568	4.41026	4.33995	4.10759	3.87839	3.253	4.53768	4.9331	4.491	3.16805	3.29981	2.94128	2.88705	2.00102
B5M07_01455	CP020694 (Chromosome)	312429	313643	-	hypothetical protein	1	5	5	38	13	25	18	14	22	179	163	221	191	50	28	3.83051	17.3556	16.1546	39.9703	14.7683	20.4126	24.8633	24.7148	26.5822	61.2804	74.4052	80.4408	43.9375	24.6922	22.533	3.44799	4.37435	4.31098	5.16756	4.19925	4.49611	4.68938	4.68451	4.75457	5.62389	5.8331	5.91901	5.27081	4.68039
B5M07_01460	CP020694 (Chromosome)	313640	314677	-	LacI family transcriptional regulator	11	19	24	49	58	72	88	63	83	500	330	460	628	422	235	42.1356	65.9511	77.542	51.5406	65.8895	58.7884	121.554	111.217	100.287	171.174	150.636	167.433	144.465	208.403	189.116	5.84528	6.25129	6.40719	6.00546	6.24215	6.12989	6.8614	6.76917	6.66301	7.22428	7.08789	7.20061	7.04388	7.43582
B5M07_01465	CP020694 (Chromosome)	314850	314926	+	#N/A	0	0	0	0	0	0	0	0	0	3	0	0	1	0	0	0	0	0	0	0	0	0	0	0	1.02705	0	0	0.230039	0	0	-1.81695	-1.82543	-1.8316	-1.92821	-1.92158	-1.95001	-1.90475	-1.88363	-1.91627	-1.68259	-1.99215	-1.99382	-1.91307	-1.99149
B5M07_01470	CP020694 (Chromosome)	315036	315308	+	hypothetical protein	0	0	0	7	0	0	0	0	0	21	6	5	23	10	2	0	0	0	7.36294	0	0	0	0	0	7.18933	2.73884	1.81993	5.29091	4.93845	1.6095	0.332616	0.291776	0.262051	1.89027	-0.0972796	-0.196139	-0.0385032	0.0345004	-0.0787202	1.92888	1.0674	0.76366	1.65196	1.56585
B5M07_01475	CP020694 (Chromosome)	315355	316020	-	L,D-transpeptidase	83	210	958	669	979	1335	565	302	410	256	491	499	288	191	206	317.932	728.933	3095.22	703.687	1112.17	1090.04	780.432	533.133	495.396	87.6413	224.129	181.629	66.2514	94.3244	165.779	8.40495	9.27624	10.9008	9.23931	9.74117	9.71904	9.35145	8.94162	8.86409	7.17673	8.05277	7.8474	6.93886	7.24209
B5M07_01480	CP020694 (Chromosome)	316232	316696	-	NADPH-dependent 7-cyano-7-deazaguanine reductase QueF	0	0	0	0	0	3	0	0	0	1	6	2	0	0	0	0	0	0	0	0	2.44952	0	0	0	0.342349	2.73884	0.727971	0	0	0	-0.974788	-0.999732	-1.01789	-1.30202	-1.28252	-0.321118	-1.23303	-1.17092	-1.26691	-1.16423	-0.203087	-0.925348	-1.46969	-1.42012
B5M07_01485	CP020694 (Chromosome)	316712	317419	-	7-carboxy-7-deazaguanine synthase QueE	0	0	0	0	0	0	0	0	0	4	0	2	4	0	0	0	0	0	0	0	0	0	0	0	1.3694	0	0.727971	0.920158	0	0	-1.32597	-1.34233	-1.35425	-1.54068	-1.52789	-1.58275	-1.49541	-1.45466	-1.51764	-1.0402	-1.6323	-1.27228	-1.1903	-1.62993
B5M07_01490	CP020694 (Chromosome)	317416	317769	-	6-carboxytetrahydropterin synthase QueD	0	0	0	0	0	0	0	0	0	2	1	1	0	0	0	0	0	0	0	0	0	0	0	0	0.684698	0.456474	0.363986	0	0	0	-1.70046	-1.71028	-1.71743	-1.82925	-1.82158	-1.85449	-1.8021	-1.77765	-1.81544	-1.65596	-1.73175	-1.76259	-1.90456	-1.89776
B5M07_01495	CP020694 (Chromosome)	317769	318470	-	7-cyano-7-deazaguanine synthase QueC	0	0	1	0	0	2	0	3	1	12	1	2	4	4	2	0	0	3.23092	0	0	1.63301	0	5.29603	1.20828	4.10819	0.456474	0.727971	0.920158	1.97538	1.6095	0.0455098	0.00750759	0.744952	-0.390591	-0.371592	0.429664	-0.323264	1.24605	0.255381	1.15925	-0.185539	-0.011439	0.098648	0.57133
B5M07_01500	CP020694 (Chromosome)	318689	320086	+	hypothetical protein	18	16	5	36	33	31	33	40	45	184	115	119	178	95	51	68.9491	55.5378	16.1546	37.8666	37.4889	25.3117	45.5827	70.6137	54.3727	62.9922	52.4945	43.3143	40.947	46.9153	41.0423	5.91663	5.69581	4.57524	5.31332	5.30359	4.92198	5.49905	5.9491	5.67896	5.83421	5.64418	5.4474	5.39033	5.52873
B5M07_01505	CP020694 (Chromosome)	320233	320991	+	glutaredoxin	1	8	11	33	40	77	13	34	13	47	60	63	52	14	27	3.83051	27.7689	35.5401	34.711	45.441	62.871	17.9568	60.0216	15.7077	16.0904	27.3884	22.9311	11.9621	6.91383	21.7283	3.30416	4.70211	4.9486	4.9387	5.22014	5.57178	4.2849	5.51239	4.15858	4.17159	4.69879	4.51961	3.88919	3.42026
B5M07_01510	CP020694 (Chromosome)	321044	321120	-	#N/A	0	0	0	0	0	0	0	0	0	0	0	1	1	0	0	0	0	0	0	0	0	0	0	0	0	0	0.363986	0.230039	0	0	-2.07405	-2.07847	-2.08168	-2.13194	-2.1285	-2.14329	-2.11974	-2.10875	-2.12573	-2.17072	-2.16934	-2.09873	-2.12418	-2.16581
B5M07_01515	CP020694 (Chromosome)	321309	322415	-	3-isopropylmalate dehydrogenase	3	4	13	43	25	49	29	11	4	301	238	187	411	173	49	11.4915	13.8844	42.0019	45.2295	28.4007	40.0088	40.0576	19.4188	4.83313	103.047	108.641	68.0653	94.5462	85.4352	39.4328	4.26458	4.3891	5.36193	5.4393	4.97544	5.31455	5.31564	4.62843	3.55901	6.31748	6.3748	5.86921	6.22409	6.1126
B5M07_01520	CP020694 (Chromosome)	322486	323592	-	endonuclease	12	13	22	70	33	36	44	27	16	180	158	114	353	136	58	45.9661	45.1244	71.0802	73.6294	37.4889	29.3942	60.777	47.6642	19.3325	61.6228	72.1229	41.4943	81.2039	67.1629	46.6755	5.56666	5.54832	6.00481	6.04763	5.36196	5.12528	5.8474	5.60061	4.74952	5.86352	6.02765	5.45988	6.1536	5.95288
B5M07_01530	CP020694 (Chromosome)	324581	325186	-	3-isopropylmalate dehydratase small subunit	4	3	4	29	33	62	6	4	4	171	111	79	267	95	84	15.322	10.4133	12.9237	30.5036	37.4889	50.6234	8.28777	7.06137	4.83313	58.5417	50.6686	28.7549	61.4205	46.9153	67.599	4.23429	3.93083	4.08801	4.8602	5.0709	5.38844	3.68316	3.58616	3.28834	5.54795	5.39217	4.80194	5.60072	5.31006
B5M07_01535	CP020694 (Chromosome)	325267	325482	+	DUF2945 domain-containing protein	1	2	0	8	0	8	1	2	0	1	0	0	6	0	2	3.83051	6.94222	0	8.41479	0	6.53205	1.38129	3.53068	0	0.342349	0	0	1.38024	0	1.6095	0.958048	1.5089	0.0476402	1.93526	-0.34405	1.70432	0.409895	1.04044	-0.324886	-0.304902	-0.626757	-0.693005	0.420208	-0.60313
B5M07_01540	CP020694 (Chromosome)	325521	326927	-	3-isopropylmalate dehydratase large subunit	9	26	32	156	115	177	34	21	32	400	190	180	618	252	126	34.4745	90.2489	103.389	164.088	130.643	144.522	46.964	37.0722	38.665	136.94	86.73	65.5174	142.164	124.449	101.399	5.57413	6.47925	6.61844	7.11035	6.86631	6.97448	5.83221	5.6153	5.64812	6.9179	6.43897	6.15381	6.95812	6.81597
B5M07_01545	CP020694 (Chromosome)	327206	328561	+	mechanosensitive ion channel protein	11	7	10	23	25	23	26	12	34	100	104	126	109	58	31	42.1356	24.2978	32.3092	24.1925	28.4007	18.7796	35.9137	21.1841	41.0816	34.2349	47.4733	45.8622	25.0743	28.643	24.9473	5.24818	4.71987	4.98761	4.70475	4.86141	4.46201	5.09536	4.58373	5.23285	5.049	5.38635	5.35072	4.73604	4.86901
B5M07_01550	CP020694 (Chromosome)	328746	329117	+	ribosome silencing factor	46	43	8	64	55	102	47	67	71	126	99	182	124	68	17	176.203	149.258	25.8473	67.3183	62.4814	83.2836	64.9209	118.278	85.788	43.136	45.1909	66.2454	28.5249	33.5814	13.6808	7.03891	6.85769	5.11341	6.0184	5.9417	6.24063	5.98078	6.61136	6.27086	5.56665	5.61344	6.0025	5.16289	5.32208
B5M07_01555	CP020694 (Chromosome)	329141	329611	+	23S rRNA (pseudouridine(1915)-N(3))-methyltransferase RlmH	32	12	13	57	45	74	18	12	20	159	102	233	165	39	25	122.576	41.6533	42.0019	59.9554	51.1212	60.4214	24.8633	21.1841	24.1656	54.4335	46.5603	84.8086	37.9565	19.2599	20.1188	6.50735	5.38087	5.38905	5.7551	5.58948	5.76403	4.88012	4.7387	4.8518	5.65651	5.49462	6.12598	5.28648	4.63173
B5M07_01560	CP020694 (Chromosome)	329623	329979	-	hypothetical protein	3	5	2	18	54	59	25	11	4	33	31	36	56	20	24	11.4915	17.3556	6.46183	18.9333	61.3454	48.1739	34.5324	19.4188	4.83313	11.2975	14.1507	13.1035	12.8822	9.8769	19.314	3.74746	4.09675	3.32266	4.18442	5.417	5.1572	4.7944	4.20661	3.01874	3.68462	3.90037	3.82573	3.80808	3.56322
B5M07_01565	CP020694 (Chromosome)	330165	331616	+	FAD-binding oxidoreductase	48	24	31	87	52	92	119	88	143	173	125	234	217	107	83	183.864	83.3067	100.158	91.5109	59.0734	75.1185	164.374	155.35	172.784	59.2264	57.0592	85.1726	49.9186	52.8414	66.7943	7.23247	6.40593	6.59291	6.50119	6.06101	6.29977	7.11748	7.05605	7.17161	6.06072	6.02432	6.42744	5.89231	5.94918
B5M07_01570	CP020694 (Chromosome)	331613	332731	+	2-hydroxy-acid oxidase	24	13	12	25	31	30	25	29	40	50	11	50	54	24	6	91.9321	45.1244	38.771	26.2962	35.2168	24.4952	34.5324	51.1949	48.3313	17.1174	5.02121	18.1993	12.4221	11.8523	4.8285	5.98533	5.21821	5.06302	4.68045	4.97719	4.60982	4.95556	5.36515	5.30854	4.25599	3.19288	4.31566	3.94948	3.91333
B5M07_01575	CP020694 (Chromosome)	332737	333096	+	hypothetical protein	0	4	2	7	16	2	11	2	8	29	23	14	21	4	3	0	13.8844	6.46183	7.36294	18.1764	1.63301	15.1942	3.53068	9.66626	9.92812	10.4989	5.0958	4.83083	1.97538	2.41425	1.63115	3.30994	2.64719	2.77078	3.65089	1.65945	3.45921	2.19996	3.01975	3.06552	3.11739	2.44424	2.39492	1.7209
B5M07_01580	CP020694 (Chromosome)	333110	334438	+	glycolate oxidase iron-sulfur subunit	5	5	4	49	44	47	32	14	26	85	47	85	149	52	34	19.1525	17.3556	12.9237	51.5406	49.9852	38.3758	44.2014	24.7148	31.4153	29.0997	21.4543	30.9388	34.2759	25.6799	27.3615	4.48407	4.39695	4.15575	5.44775	5.415	5.14204	5.28527	4.70321	4.93784	4.86162	4.5604	4.92349	5.0281	4.7369
B5M07_01585	CP020694 (Chromosome)	334488	335318	+	trypsin	25	26	40	180	85	152	73	27	52	127	93	93	336	119	73	95.7626	90.2489	129.237	189.333	96.5622	124.109	100.835	47.6642	62.8307	43.4783	42.4521	33.8507	77.2933	58.7675	58.7468	6.47992	6.41933	6.79535	7.21357	6.4924	6.75806	6.53732	5.78242	6.05212	5.68563	5.66328	5.44726	6.26221	5.98373
B5M07_01590	CP020694 (Chromosome)	335468	335938	+	heat-shock protein	152	138	85	118	129	213	106	148	199	217	385	602	173	93	113	582.237	479.013	274.628	124.118	146.547	173.916	146.417	261.271	240.448	74.2897	175.742	219.119	39.7968	45.9276	90.9368	8.7209	8.50331	7.8958	7.06996	7.2387	7.41528	7.23789	7.84401	7.75591	6.56307	7.42623	7.65801	5.98823	6.11856
B5M07_01595	CP020694 (Chromosome)	336186	336740	+	hypothetical protein	0	1	2	4	16	27	0	1	4	8	8	18	1	1	5	0	3.47111	6.46183	4.2074	18.1764	22.0457	0	1.76534	4.83313	2.73879	3.65179	6.55174	0.230039	0.493845	4.02375	1.05893	1.78329	2.24173	1.94209	3.36536	3.58976	0.649477	1.37002	2.05623	1.58872	1.82997	2.36577	0.242266	0.62504
B5M07_01600	CP020694 (Chromosome)	336921	338396	-	succinate-semialdehyde dehydrogenase / glutarate-semialdehyde dehydrogenase	8	15	8	29	10	24	18	4	22	288	261	318	505	352	200	30.644	52.0667	25.8473	30.5036	11.3603	19.5961	24.8633	7.06137	26.5822	98.5965	119.14	115.747	116.17	173.833	160.95	5.15601	5.66236	4.99868	5.13238	4.26262	4.7154	4.94252	3.96499	5.00284	6.34106	6.54662	6.51545	6.52007	6.96477
B5M07_01605	CP020694 (Chromosome)	338488	339276	+	alpha/beta hydrolase	10	7	12	6	17	15	13	12	12	94	58	124	148	89	65	38.3051	24.2978	38.771	6.31109	19.3124	12.2476	17.9568	21.1841	14.4994	32.1808	26.4755	45.1342	34.0458	43.9522	52.3088	5.06871	4.62705	5.08434	3.45543	4.40317	3.98016	4.33683	4.49423	4.1392	4.90863	4.71	5.26089	4.96715	5.23196
B5M07_01610	CP020694 (Chromosome)	339405	340034	+	hypothetical protein	9	4	6	10	14	27	21	4	10	73	34	59	92	26	33	34.4745	13.8844	19.3855	10.5185	15.9044	22.0457	29.0072	7.06137	12.0828	24.9915	15.5201	21.4751	21.1636	12.84	26.5568	4.79515	3.94112	4.23616	3.67157	4.04985	4.36838	4.64188	3.37282	3.79718	4.49809	4.02366	4.3442	4.33007	3.84331
B5M07_01615	CP020694 (Chromosome)	340111	342621	+	sodium:proton antiporter	25	19	16	53	38	50	38	21	54	239	224	273	300	133	90	95.7626	65.9511	51.6947	55.748	43.169	40.8253	52.4892	37.0722	65.2472	81.8214	102.25	99.368	69.0118	65.6814	72.4275	6.41074	6.02919	5.78861	5.85949	5.60669	5.55076	5.79984	5.46458	6.01884	6.25365	6.48847	6.45835	6.0768	6.02577
B5M07_01620	CP020694 (Chromosome)	342737	343339	-	hypothetical protein	3	20	31	233	311	539	47	79	59	38	79	128	51	18	34	11.4915	69.4222	100.158	245.081	353.304	440.097	64.9209	139.462	71.2886	13.0093	36.0614	46.5901	11.732	8.88921	27.3615	4.51914	6.04952	6.43237	7.42445	7.84063	8.09465	5.98293	6.79467	6.07993	4.45489	5.39058	5.64449	4.36222	4.15857
B5M07_01625	CP020694 (Chromosome)	343358	344935	-	glycosyl transferase	9	13	10	26	24	19	4	11	17	134	101	70	244	157	38	34.4745	45.1244	32.3092	27.3481	27.2646	15.5136	5.52518	19.4188	20.5408	45.8747	46.1039	25.479	56.1296	77.5336	30.5805	5.04	5.31046	4.97776	4.81437	4.81151	4.27362	3.48697	4.4923	4.53911	5.3435	5.34811	4.74264	5.55744	5.90337
B5M07_01630	CP020694 (Chromosome)	345105	345923	+	hypothetical protein	1	3	1	14	7	8	9	8	7	45	20	27	60	23	14	3.83051	10.4133	3.23092	14.7259	7.95218	6.53205	12.4317	14.1227	8.45797	15.4057	9.12948	9.82761	13.8024	11.3584	11.2665	2.68213	3.34117	2.57169	3.67686	3.10592	2.93206	3.51034	3.62723	3.16026	3.73174	3.22525	3.29416	3.62403	3.43143
B5M07_01635	CP020694 (Chromosome)	345971	346459	+	SsrA-binding protein	5	9	13	16	17	59	16	18	35	91	46	87	157	61	24	19.1525	31.24	42.0019	16.8296	19.3124	48.1739	22.1007	31.7762	42.2899	31.1537	20.9978	31.6667	36.1162	30.1245	19.314	4.46872	4.91583	5.2108	4.32377	4.45236	5.3665	4.58148	4.93558	5.22832	4.91833	4.52655	4.93488	5.06989	4.88409
B5M07_01640	CP020694 (Chromosome)	346710	347564	+	3-mercaptopyruvate sulfurtransferase	2	1	3	10	9	13	8	14	21	65	20	36	116	37	15	7.66101	3.47111	9.69275	10.5185	10.2242	10.6146	11.0504	24.7148	25.3739	22.2527	9.12948	13.1035	26.6846	18.2723	12.0713	3.30176	2.83984	3.46602	3.51245	3.48778	3.5185	3.55964	4.33287	4.3674	4.24426	3.37568	3.71532	4.43349	4.04257
B5M07_01645	CP020694 (Chromosome)	347598	348779	+	aromatic amino acid aminotransferase	15	8	8	45	37	55	37	32	29	179	124	165	246	123	67	57.4576	27.7689	25.8473	47.3332	42.033	44.9078	51.1079	56.491	35.0402	61.2804	56.6028	60.0576	56.5897	60.7429	53.9183	5.76292	5.07033	5.00484	5.56995	5.45091	5.51679	5.64754	5.7491	5.27206	5.83587	5.75327	5.81486	5.7534	5.82637
B5M07_01650	CP020694 (Chromosome)	348968	350704	+	hypothetical protein	7	21	3	58	40	54	47	24	71	203	162	171	420	191	102	26.8135	72.8933	9.69275	61.0072	45.441	44.0913	64.9209	42.3682	85.788	69.4968	73.9488	62.2415	96.6166	94.3244	82.0845	5.13258	6.08015	4.37055	5.90097	5.60408	5.57327	5.96445	5.53722	6.25508	6.03638	6.10096	5.92206	6.38423	6.35777
B5M07_01655	CP020694 (Chromosome)	350764	352071	-	ammonium transporter	24	157	83	739	414	69	0	4	0	2533	2962	3254	7277	5921	2767	91.9321	544.964	268.166	777.317	470.315	56.3389	0	7.06137	0	867.17	1352.08	1184.41	1674	2924.06	2226.74	7.10774	8.87491	8.12976	9.26441	8.71793	6.66069	4.88286	5.41426	4.85256	9.38606	9.88486	9.73509	10.1286	10.7748
B5M07_01660	CP020694 (Chromosome)	352373	354598	+	glycosyl transferase	10	10	8	40	38	55	41	17	31	295	164	167	335	153	114	38.3051	34.7111	25.8473	42.074	43.169	44.9078	56.6331	30.0108	37.4567	100.993	74.8617	60.7856	77.0632	75.5583	91.7415	5.40567	5.31252	5.04664	5.48717	5.51286	5.5516	5.78627	5.16598	5.3735	6.39631	6.07749	5.86021	6.1087	6.08713
B5M07_01665	CP020694 (Chromosome)	354714	356450	+	type I secretion system permease/ATPase	168	98	137	65	67	63	116	171	155	216	148	200	292	125	80	643.525	340.169	442.635	68.3702	76.1138	51.4399	160.23	301.874	187.284	73.9474	67.5581	72.7971	67.1715	61.7306	64.38	8.75154	8.03768	8.33174	6.36709	6.47172	6.09583	7.22855	7.9091	7.39371	6.44052	6.35272	6.42521	6.34605	6.26584
B5M07_01670	CP020694 (Chromosome)	356447	357757	+	RTX toxin	18	16	15	72	55	73	51	51	60	172	117	141	257	119	61	68.9491	55.5378	48.4637	75.7331	62.4814	59.6049	70.446	90.0325	72.4969	58.884	53.4074	51.322	59.1201	58.7675	49.0898	6.05654	5.84163	5.70995	6.15539	5.95838	5.91046	6.08074	6.331	6.11035	5.89793	5.7994	5.75948	5.90196	5.89598
B5M07_01675	CP020694 (Chromosome)	357850	358308	+	hypothetical protein	2	3	3	2	6	1	3	13	10	39	24	12	59	12	12	7.66101	10.4133	9.69275	2.1037	6.81616	0.816506	4.14388	22.9494	12.0828	13.3516	10.9554	4.36783	13.5723	5.92614	9.657	2.93216	3.18505	3.12569	1.98588	2.83099	1.52276	2.44292	3.99092	3.35565	3.47142	3.27362	2.43582	3.49034	2.70187
B5M07_01680	CP020694 (Chromosome)	358305	359066	+	phosphodiesterase	1	3	5	10	9	14	6	9	7	76	38	46	100	47	22	3.83051	10.4133	16.1546	10.5185	10.2242	11.4311	8.28777	15.8881	8.45797	26.0185	17.346	16.7433	23.0039	23.2107	17.7045	2.93413	3.54894	3.92478	3.5328	3.50838	3.60663	3.33179	3.91569	3.3448	4.42224	4.00859	3.97402	4.29665	4.30259
B5M07_01685	CP020694 (Chromosome)	359115	360302	+	GNAT family N-acetyltransferase	10	4	8	12	15	55	10	2	10	85	44	79	99	37	27	38.3051	13.8844	25.8473	12.6222	17.0404	44.9078	13.8129	3.53068	12.0828	29.0997	20.0848	28.7549	22.7739	18.2723	21.7283	4.94097	3.98425	4.5496	3.87251	4.15234	5.1394	3.9586	2.97679	3.83582	4.68817	4.31158	4.6757	4.43817	4.21817
B5M07_01690	CP020694 (Chromosome)	360299	360607	+	4a-hydroxytetrahydrobiopterin dehydratase	5	0	3	2	17	4	1	6	8	14	23	56	64	38	24	19.1525	0	9.69275	2.1037	19.3124	3.26602	1.38129	10.5921	9.66626	4.79288	10.4989	20.3832	14.7225	18.7661	19.314	3.83849	1.92764	3.21757	2.07888	3.90213	2.32475	1.93876	3.30393	3.22324	2.58954	3.30599	3.9751	3.64395	3.88652
B5M07_01695	CP020694 (Chromosome)	360620	361465	+	mechanosensitive ion channel protein MscS	38	48	18	32	61	65	30	39	41	166	204	235	245	133	81	145.559	166.613	58.1565	33.6592	69.2976	53.0729	41.4388	68.8483	49.5396	56.8299	93.1207	85.5366	56.3597	65.6814	65.1848	6.88009	7.02767	5.93149	5.39745	6.10608	5.83642	5.59664	6.09936	5.7693	5.90407	6.41352	6.32455	5.89548	6.05128
B5M07_01700	CP020694 (Chromosome)	361542	362030	-	peroxiredoxin	0	2	2	12	4	19	5	5	15	35	25	71	50	29	12	0	6.94222	6.46183	12.6222	4.5441	15.5136	6.90647	8.82671	18.1242	11.9822	11.4118	25.843	11.502	14.3215	9.657	2.0981	3.04269	2.98834	3.54024	2.66802	3.74425	3.00235	3.21294	3.89353	3.49584	3.44786	4.2758	3.4568	3.66936
B5M07_01705	CP020694 (Chromosome)	362119	363324	+	pyridine nucleotide-disulfide oxidoreductase	0	3	3	10	11	32	14	14	22	48	27	56	105	41	12	0	10.4133	9.69275	10.5185	12.4963	26.1282	19.3381	24.7148	26.5822	16.4327	12.3248	20.3832	24.1541	20.2476	9.657	2.44203	3.59395	3.53488	3.57109	3.72866	4.45488	4.14543	4.38716	4.46795	3.99028	3.71118	4.20587	4.38066	4.19805
B5M07_01710	CP020694 (Chromosome)	363321	363878	+	16S rRNA (guanine(966)-N(2))-methyltransferase RsmD	0	0	0	2	5	2	4	0	0	10	1	10	14	5	2	0	0	0	2.1037	5.68013	1.63301	5.52518	0	0	3.42349	0.456474	3.63986	3.22055	2.46922	1.6095	0.454567	0.41399	0.384455	0.938934	1.70352	0.782962	1.66176	0.173375	0.0617284	1.32695	0.169615	1.37603	1.28393	1.06436
B5M07_01715	CP020694 (Chromosome)	364009	365271	+	peptidase	6	15	25	18	21	37	23	6	22	100	165	219	160	406	185	22.983	52.0667	80.7729	18.9333	23.8566	30.2107	31.7698	10.5921	26.5822	34.2349	75.3182	79.7128	36.8063	200.501	148.879	4.86314	5.62787	6.08388	4.65085	4.8638	5.08598	5.13809	4.19599	4.96621	5.20676	6.02136	6.08237	5.27894	7.09841
B5M07_01720	CP020694 (Chromosome)	365333	365581	+	ferredoxin	1	0	0	0	1	0	0	0	0	6	2	20	8	13	11	3.83051	0	0	0	1.13603	0	0	0	0	2.05409	0.912948	7.27971	1.84032	6.41998	8.85225	1.08911	0.230387	0.200456	-0.193923	0.438637	-0.271514	-0.110465	-0.0365473	-0.151362	0.814017	0.287416	1.92155	0.735362	1.78776
B5M07_01725	CP020694 (Chromosome)	365578	366063	+	bacterioferritin	10	3	5	59	51	62	34	18	55	251	226	209	442	263	289	38.3051	10.4133	16.1546	62.0591	57.9373	50.6234	46.964	31.7762	66.4555	85.9296	103.163	76.073	101.677	129.881	232.573	5.47784	4.46094	4.74796	5.9426	5.87259	5.73604	5.66258	5.2901	6.0127	6.28214	6.47611	6.15403	6.4613	6.72425
B5M07_01730	CP020694 (Chromosome)	366133	367656	+	thiol oxidoreductase	3	2	2	12	10	17	3	10	6	91	105	118	139	129	76	11.4915	6.94222	6.46183	12.6222	11.3603	13.8806	4.14388	17.6534	7.24969	31.1537	47.9297	42.9503	31.9755	63.706	61.161	3.8214	3.45704	3.40228	3.85885	3.76527	3.94398	3.00735	4.17613	3.38989	4.7519	5.20852	5.09163	4.7802	5.51797
B5M07_01735	CP020694 (Chromosome)	367656	368642	+	signal peptidase	3	5	1	11	0	8	3	0	14	78	54	63	77	73	31	11.4915	17.3556	3.23092	11.5703	0	6.53205	4.14388	0	16.9159	26.7032	24.6496	22.9311	17.713	36.0507	24.9473	3.50707	3.88217	2.66062	3.51613	1.57847	2.99884	2.67764	1.79582	3.88436	4.36952	4.283	4.20889	3.94393	4.68794
B5M07_01740	CP020694 (Chromosome)	368642	369718	+	twin-arginine translocation pathway signal	5	5	4	10	11	19	9	5	5	71	58	122	131	65	39	19.1525	17.3556	12.9237	10.5185	12.4963	15.5136	12.4317	8.82671	6.04141	24.3068	26.4755	44.4062	30.1352	32.0999	31.3853	4.23123	4.14218	3.88614	3.67722	3.83244	4.03094	3.83108	3.54907	3.23337	4.47604	4.56267	5.10698	4.69853	4.76183
B5M07_01745	CP020694 (Chromosome)	369748	370578	-	type I methionyl aminopeptidase	3	5	7	26	14	32	25	17	23	177	88	92	254	109	43	11.4915	17.3556	22.6164	27.3481	15.9044	26.1282	34.5324	30.0108	27.7905	60.5958	40.1697	33.4867	58.43	53.8291	34.6043	4.11424	4.42479	4.65252	4.8232	4.31335	4.77777	5.05516	4.91527	4.83927	5.64474	5.21216	5.02579	5.60672	5.51806
B5M07_01750	CP020694 (Chromosome)	370630	371337	-	sugar fermentation stimulation protein SfsA	0	0	0	0	0	0	2	0	0	0	1	1	11	0	1	0	0	0	0	0	0	2.76259	0	0	0	0.456474	0.363986	2.53043	0	0.80475	-0.920625	-0.946786	-0.965828	-1.26382	-1.24337	-1.33107	-0.23285	-1.12632	-1.227	-1.41496	-1.03905	-1.10401	-0.162468	-1.3852
B5M07_01755	CP020694 (Chromosome)	371386	372105	+	competence/damage-inducible protein A	3	8	3	5	4	9	4	6	1	48	19	27	38	16	9	11.4915	27.7689	9.69275	5.25925	4.5441	7.34855	5.52518	10.5921	1.20828	16.4327	8.673	9.82761	8.7415	7.90152	7.24275	3.31892	4.19187	3.17773	2.66235	2.55195	2.94102	2.71063	3.26793	1.818	3.72032	3.09182	3.2109	3.09989	3.00521
B5M07_01760	CP020694 (Chromosome)	372102	372818	+	GNAT family N-acetyltransferase	4	2	1	25	6	11	8	11	12	45	42	43	49	23	20	15.322	6.94222	3.23092	26.2962	6.81616	8.98157	11.0504	19.4188	14.4994	15.4057	19.1719	15.6514	11.2719	11.3584	16.095	3.8249	3.19517	2.75772	4.38368	3.11561	3.34279	3.53429	4.06667	3.78708	3.8511	4.06884	3.86662	3.54704	3.55551
B5M07_01765	CP020694 (Chromosome)	372830	373399	+	alkylhydroperoxidase	1	0	9	5	11	10	1	6	8	35	23	39	61	27	16	3.83051	0	29.0782	5.25925	12.4963	8.16506	1.38129	10.5921	9.66626	11.9822	10.4989	14.1954	14.0324	13.3338	12.876	2.62328	1.96156	4.29621	2.71742	3.48185	3.08638	1.96867	3.32099	3.24011	3.45048	3.32116	3.61803	3.60864	3.55376
B5M07_01770	CP020694 (Chromosome)	373396	374349	+	cell envelope biogenesis protein OmpA	7	9	11	36	16	18	24	29	23	128	82	114	139	66	42	26.8135	31.24	35.5401	37.8666	18.1764	14.6971	33.1511	51.1949	27.7905	43.8207	37.4309	41.4943	31.9755	32.5938	33.7995	4.83419	4.97682	5.10179	5.1694	4.45815	4.26065	5.03498	5.47697	4.86075	5.32187	5.15901	5.26527	4.99907	5.01837
B5M07_01775	CP020694 (Chromosome)	374351	374782	-	AsnC family transcriptional regulator	0	0	0	2	0	2	0	0	1	8	2	12	9	2	3	0	0	0	2.1037	0	1.63301	0	0	1.20828	2.73879	0.912948	4.36783	2.07035	0.98769	2.41425	0.086684	0.0498792	0.0230908	0.596621	-0.306284	0.450778	-0.261824	-0.202703	0.286858	0.825992	0.14212	1.19662	0.630683	0.181497
B5M07_01780	CP020694 (Chromosome)	374907	376148	+	MFS transporter	1	2	1	17	8	15	6	3	5	59	36	49	75	47	17	3.83051	6.94222	3.23092	17.8814	9.08821	12.2476	8.28777	5.29603	6.04141	20.1986	16.4331	17.8353	17.253	23.2107	13.6808	2.77253	3.10948	2.66121	3.93095	3.28905	3.56341	3.21162	2.87087	2.94766	4.06494	3.85431	3.93799	3.90628	4.20531
B5M07_01785	CP020694 (Chromosome)	376145	377059	-	ornithine cyclodeaminase	2	2	0	11	8	9	9	7	10	157	85	67	136	127	62	7.66101	6.94222	0	11.5703	9.08821	7.34855	12.4317	12.3574	12.0828	53.7488	38.8003	24.387	31.2854	62.7183	49.8945	3.46137	3.3855	2.46289	3.72447	3.51288	3.32138	3.79399	3.79293	3.76606	5.29232	4.93851	4.45191	4.71277	5.45979
B5M07_01790	CP020694 (Chromosome)	377056	377676	-	haloacid dehalogenase	7	2	1	11	16	2	19	1	14	91	55	77	120	78	31	26.8135	6.94222	3.23092	11.5703	18.1764	1.63301	26.2446	1.76534	16.9159	31.1537	25.1061	28.0269	27.6047	38.5199	24.9473	4.47286	3.32849	2.90191	3.67989	4.10941	2.28654	4.47694	2.50429	4.0389	4.66792	4.44117	4.55663	4.54236	4.89142
B5M07_01795	CP020694 (Chromosome)	377709	378161	-	hypothetical protein	0	0	0	9	0	15	0	1	2	20	8	14	26	9	8	0	0	0	9.46664	0	12.2476	0	1.76534	2.41656	6.84698	3.65179	5.0958	5.98103	4.4446	6.438	0.997781	0.963263	0.93773	2.62055	0.543364	2.88911	0.618298	1.32168	1.47877	2.34627	1.78154	2.073	2.22511	1.94778
B5M07_01800	CP020694 (Chromosome)	378165	378998	-	S-formylglutathione hydrolase	5	3	0	19	18	17	10	7	7	88	58	48	139	103	60	19.1525	10.4133	0	19.9851	20.4485	13.8806	13.8129	12.3574	8.45797	30.1267	26.4755	17.4713	31.9755	50.866	48.285	4.23462	3.72041	2.53381	4.27957	4.30193	3.92813	3.9289	3.8334	3.49786	4.70074	4.56607	4.14756	4.76404	5.2556
B5M07_01805	CP020694 (Chromosome)	379027	379956	-	malate transporter	0	1	5	10	5	7	6	4	7	61	36	36	120	59	47	0	3.47111	16.1546	10.5185	5.68013	5.71554	8.28777	7.06137	8.45797	20.8833	16.4331	13.1035	27.6047	29.1368	37.8233	2.21676	2.73345	3.83088	3.44196	2.91612	2.90643	3.23307	3.10883	3.2479	4.12194	3.87618	3.65195	4.41535	4.46774
B5M07_01810	CP020694 (Chromosome)	380012	380986	-	rubrerythrin family protein	4	7	12	22	21	12	14	14	7	68	46	49	99	62	43	15.322	24.2978	38.771	23.1407	23.8566	9.79807	19.3381	24.7148	8.45797	23.2797	20.9978	17.8353	22.7739	30.6184	34.6043	4.12204	4.53439	4.99997	4.49266	4.52264	3.69225	4.31804	4.55577	3.58513	4.50007	4.39701	4.23634	4.47821	4.77808
B5M07_01815	CP020694 (Chromosome)	381142	381621	+	hypothetical protein	2	5	8	58	108	158	22	24	31	50	88	56	80	73	44	7.66101	17.3556	25.8473	61.0072	122.691	129.008	30.3885	42.3682	37.4567	17.1174	40.1697	20.3832	18.4032	36.0507	35.409	3.92015	4.48411	4.82987	5.69385	6.45411	6.51221	4.97779	5.31065	5.18661	4.41774	5.25938	4.58367	4.48411	5.14854
B5M07_01820	CP020694 (Chromosome)	381636	382946	-	phenylacetate--CoA ligase	52	32	16	4	12	7	11	60	12	29	20	23	30	28	24	199.186	111.076	51.6947	4.2074	13.6323	5.71554	15.1942	105.921	14.4994	9.92812	9.12948	8.37167	6.90118	13.8277	19.314	6.82026	6.14309	5.29026	2.99909	3.9542	3.19791	4.05815	6.10598	4.0126	3.64347	3.57106	3.48915	3.31003	3.95906
B5M07_01825	CP020694 (Chromosome)	382946	383383	-	phenylacetic acid degradation protein PaaD	0	4	2	0	0	0	2	6	1	0	0	0	4	0	2	0	13.8844	6.46183	0	0	0	2.76259	10.5921	1.20828	0	0	0	0.920158	0	1.6095	-0.109085	2.15931	1.31009	-0.630428	-0.60602	-0.712078	0.715498	2.01965	0.139688	-0.993598	-0.901934	-0.974335	-0.0287305	-0.876422
B5M07_01830	CP020694 (Chromosome)	383514	383861	+	hypothetical protein	12	6	11	15	42	62	30	20	36	61	76	92	78	56	29	45.9661	20.8267	35.5401	15.7777	47.7131	50.6234	41.4388	35.3068	43.4981	20.8833	34.692	33.4867	17.9431	27.6553	23.3378	5.34533	4.59243	5.09009	4.31586	5.39652	5.46009	5.24972	5.08628	5.3003	4.56687	5.07086	5.03503	4.42025	4.84282
B5M07_01835	CP020694 (Chromosome)	383858	384640	-	NLP/P60 hydrolase	4	2	0	5	2	3	3	2	2	63	27	40	61	22	29	15.322	6.94222	0	5.25925	2.27205	2.44952	4.14388	3.53068	2.41656	21.568	12.3248	14.5594	14.0324	10.8646	23.3378	3.51561	2.83413	1.73039	2.59185	2.01164	2.01967	2.41916	2.32842	2.05514	3.95192	3.37499	3.54476	3.51062	3.24972
B5M07_01840	CP020694 (Chromosome)	384637	386019	-	leucyl aminopeptidase	3	2	6	2	6	22	6	7	5	112	57	45	93	52	32	11.4915	6.94222	19.3855	2.1037	6.81616	17.9631	8.28777	12.3574	6.04141	38.3431	26.019	16.3793	21.3937	25.6799	25.752	3.63922	3.26024	4.10497	2.39105	3.16959	4.04916	3.33793	3.6907	3.07752	4.84233	4.43063	3.96016	4.23125	4.41649
B5M07_01845	CP020694 (Chromosome)	386083	386460	-	hypothetical protein	0	0	0	2	0	0	1	0	0	0	0	0	1	0	0	0	0	0	2.1037	0	0	1.38129	0	0	0	0	0	0.230039	0	0	-1.51129	-1.52999	-1.54359	-0.997428	-1.74197	-1.80464	-1.32529	-1.65831	-1.73026	-1.90252	-1.89063	-1.90016	-1.72492	-1.88702
B5M07_01850	CP020694 (Chromosome)	386616	387266	+	carbonic anhydrase	5	9	0	41	14	49	29	10	13	20	24	43	57	25	10	19.1525	31.24	0	43.1258	15.9044	40.0088	40.0576	17.6534	15.7077	6.84698	10.9554	15.6514	13.1122	12.3461	8.0475	4.16079	4.64428	2.41307	5.01509	3.99204	4.93774	4.9315	4.09133	3.98012	3.20729	3.63464	3.97622	3.80297	3.74757
B5M07_01855	CP020694 (Chromosome)	387347	388369	-	aspartate-semialdehyde dehydrogenase	2	3	16	44	34	91	16	20	16	311	215	178	294	135	70	7.66101	10.4133	51.6947	46.2814	38.6249	74.302	22.1007	35.3068	19.3325	106.471	98.1419	64.7894	67.6316	66.6691	56.3325	4.0791	4.24615	5.61127	5.50218	5.31994	5.99616	4.78705	5.23272	4.66316	6.38624	6.29701	5.85286	5.89875	5.88257
B5M07_01860	CP020694 (Chromosome)	388478	389152	-	hypothetical protein	15	4	3	21	23	33	11	10	32	111	162	188	179	99	75	57.4576	13.8844	9.69275	22.0888	26.1286	26.9447	15.1942	17.6534	38.665	38.0007	73.9488	68.4293	41.1771	48.8906	60.3563	5.5951	4.28135	4.01494	4.64651	4.80835	4.83712	4.30955	4.44878	5.19842	5.18273	5.88452	5.80146	5.26582	5.4436
B5M07_01865	CP020694 (Chromosome)	389154	389462	-	hypothetical protein	2	5	3	17	5	8	17	25	18	101	149	111	218	128	106	7.66101	17.3556	9.69275	17.8814	5.68013	6.53205	23.482	44.1336	21.7491	34.5772	68.0146	40.4024	50.1486	63.2121	85.3035	3.73212	4.32842	3.8656	4.33212	3.38396	3.46004	4.59504	5.23233	4.52014	4.98687	5.7056	5.14913	5.3789	5.62573
B5M07_01870	CP020694 (Chromosome)	389679	390260	+	hypothetical protein	13	32	17	49	46	46	48	41	20	118	262	224	286	283	192	49.7966	111.076	54.9256	51.5406	52.2572	37.5593	66.3022	72.379	24.1656	40.3972	119.596	81.5328	65.7913	139.758	154.512	5.77603	6.58696	5.86916	5.80169	5.81561	5.49215	6.05513	6.14445	5.09421	5.55906	6.67403	6.26893	6.0471	6.84162
B5M07_01875	CP020694 (Chromosome)	390385	391014	+	ribonuclease HII	1	4	2	5	0	2	3	0	0	20	16	2	10	6	3	3.83051	13.8844	6.46183	5.25925	0	1.63301	4.14388	0	0	6.84698	7.30358	0.727971	2.30039	2.96307	2.41425	1.67479	2.81324	2.08702	2.00261	0.419124	1.1242	1.7869	0.587363	0.442691	2.28433	2.33959	0.621929	1.33165	1.53505
B5M07_01880	CP020694 (Chromosome)	391103	392203	+	modification methylase	11	4	7	94	91	98	65	20	75	1531	1174	1088	1529	776	393	42.1356	13.8844	22.6164	98.8738	103.378	80.0176	89.7842	35.3068	90.6211	524.136	535.9	396.016	351.73	383.224	316.267	5.95824	5.14524	5.45713	6.74192	6.78695	6.53058	6.64608	5.77972	6.65494	8.53521	8.5601	8.22074	8.0893	8.18396
B5M07_01885	CP020694 (Chromosome)	392318	392743	-	response regulator	5	6	5	9	3	3	2	2	13	11	8	20	13	8	3	19.1525	20.8267	16.1546	9.46664	3.40808	2.44952	2.76259	3.53068	15.7077	3.76584	3.65179	7.27971	2.99051	3.95076	2.41425	3.61757	3.71524	3.46172	2.9983	2.13762	1.8906	2.01242	2.18919	3.4945	2.17604	2.1564	2.76226	1.98136	2.22214
B5M07_01890	CP020694 (Chromosome)	392812	393972	-	alkane 1-monooxygenase	17	36	31	40	25	40	36	22	28	62	66	86	108	117	51	65.1186	124.96	100.158	42.074	28.4007	32.6602	49.7266	38.8375	33.8319	21.2256	30.1273	31.3028	24.8443	57.7798	41.0423	5.84013	6.53843	6.2988	5.40028	5.01396	5.14771	5.56967	5.32085	5.1838	4.72965	5.06668	5.1038	4.87756	5.72699
B5M07_01895	CP020694 (Chromosome)	394027	395091	-	A/G-specific adenine glycosylase	7	4	3	3	8	6	8	7	1	22	9	17	16	16	10	26.8135	13.8844	9.69275	3.15555	9.08821	4.89904	11.0504	12.3574	1.20828	7.53168	4.10826	6.18775	3.68063	7.90152	8.0475	4.07576	3.41542	3.09281	2.2005	3.05919	2.51838	3.23911	3.33883	1.71518	2.89078	2.36034	2.71048	2.25621	2.93486
B5M07_01900	CP020694 (Chromosome)	395174	395683	+	RNA-binding protein	0	3	4	4	9	8	6	11	2	27	20	20	43	6	6	0	10.4133	12.9237	4.2074	10.2242	6.53205	8.28777	19.4188	2.41656	9.24342	9.12948	7.27971	9.8917	2.96307	4.8285	1.76154	3.12493	3.32576	2.38453	3.14584	2.74021	2.94909	3.76638	2.0238	3.06281	3.0493	2.83775	3.13004	2.08914
B5M07_01905	CP020694 (Chromosome)	395721	396407	+	thiol-disulfide oxidoreductase	1	6	20	29	26	65	10	10	9	115	120	223	147	93	85	3.83051	20.8267	64.6183	30.5036	29.5367	53.0729	13.8129	17.6534	10.8745	39.3701	54.7769	81.1688	33.8158	45.9276	68.4038	3.54363	4.60106	5.71248	4.94909	4.9172	5.51864	4.21301	4.43552	4.00669	5.20904	5.55411	5.97741	5.05317	5.36848
B5M07_01910	CP020694 (Chromosome)	396407	397525	+	CoA transferase	3	18	4	16	23	22	17	7	18	128	78	122	127	48	61	11.4915	62.48	12.9237	16.8296	26.1286	17.9631	23.482	12.3574	21.7491	43.8207	35.605	44.4062	29.215	23.7046	49.0898	4.01386	5.58809	4.08986	4.28168	4.70408	4.34012	4.59974	4.02189	4.52518	5.23647	5.01931	5.25029	4.81729	4.60716
B5M07_01915	CP020694 (Chromosome)	397554	398540	-	tetraacyldisaccharide 4'-kinase	4	3	7	15	9	19	12	12	13	52	41	50	95	27	17	15.322	10.4133	22.6164	15.7777	10.2242	15.5136	16.5755	21.1841	15.7077	17.8021	18.7154	18.1993	21.8537	13.3338	13.6808	3.96754	3.64851	4.32793	3.99123	3.59524	3.97484	4.03823	4.27407	3.98712	4.10947	4.15871	4.13128	4.31584	3.82911
B5M07_01920	CP020694 (Chromosome)	398527	399771	-	3-deoxy-D-manno-octulosonic acid transferase	8	4	10	43	23	30	12	10	16	98	96	109	142	69	36	30.644	13.8844	32.3092	45.2295	26.1286	24.4952	16.5755	17.6534	19.3325	33.5502	43.8215	39.6744	32.6656	34.0753	28.971	4.89324	4.19582	4.94561	5.29607	4.73919	4.67522	4.31109	4.37291	4.45056	4.99081	5.26655	5.1635	4.9638	5.00623
B5M07_01925	CP020694 (Chromosome)	399778	400020	-	inositol monophosphatase	0	4	1	8	0	2	3	2	1	31	11	19	29	12	1	0	13.8844	3.23092	8.41479	0	1.63301	4.14388	3.53068	1.20828	10.6128	5.02121	6.91572	6.67114	5.92614	0.80475	1.19175	3.01987	1.83958	2.62992	0.70601	1.3513	2.0019	1.88346	1.24902	2.88819	2.17494	2.47141	2.44249	2.32337
B5M07_01930	CP020694 (Chromosome)	400084	400866	-	3'(2'),5'-bisphosphate nucleotidase CysQ	11	9	22	42	23	40	27	29	25	100	59	92	90	34	48	42.1356	31.24	71.0802	44.1777	26.1286	32.6602	37.295	51.1949	30.207	34.2349	26.932	33.4867	20.7035	16.7907	38.628	5.29569	5.00497	5.83835	5.35194	4.82726	5.04581	5.17868	5.50149	4.96887	5.09309	4.85358	5.07074	4.59595	4.40303
B5M07_01935	CP020694 (Chromosome)	400853	402199	-	modulator protein	66	61	129	126	122	155	98	96	79	313	250	318	280	116	107	252.813	211.738	416.788	132.533	138.595	126.558	135.367	169.473	95.4543	107.155	114.118	115.747	64.411	57.286	86.1083	7.7247	7.53515	8.2742	7.04595	7.09214	6.99843	7.06774	7.30152	6.71292	6.82812	6.8923	6.90672	6.32454	6.21512
B5M07_01940	CP020694 (Chromosome)	402312	403841	-	hypothetical protein	176	169	222	218	161	168	179	214	272	316	358	579	404	290	213	674.169	586.618	717.263	229.303	182.9	137.173	247.252	377.783	328.653	108.182	163.418	210.748	92.9359	143.215	171.412	9.01404	8.86119	9.08334	7.8614	7.63079	7.34443	7.9393	8.3858	8.23778	7.11462	7.51695	7.7745	6.97237	7.38606
B5M07_01945	CP020694 (Chromosome)	403985	404734	+	short-chain dehydrogenase	13	0	0	11	12	17	9	6	16	55	31	28	50	25	13	49.7966	0	0	11.5703	13.6323	13.8806	12.4317	10.5921	19.3325	18.8292	14.1507	10.1916	11.502	12.3461	10.4618	4.99045	2.17472	2.1392	3.53382	3.68922	3.70862	3.60068	3.45442	4.03297	4.01815	3.72996	3.41226	3.52797	3.59634
B5M07_01950	CP020694 (Chromosome)	404731	405345	+	enoyl-CoA hydratase	1	2	0	6	2	11	12	1	17	28	17	31	46	12	13	3.83051	6.94222	0	6.31109	2.27205	8.98157	16.5755	1.76534	20.5408	9.58577	7.76005	11.2836	10.5818	5.92614	10.4618	2.43961	2.81494	1.71232	2.7292	2.00022	3.04581	3.63113	1.94659	3.85615	3.11383	2.91283	3.27203	3.21167	2.66893
B5M07_01955	CP020694 (Chromosome)	405342	405668	-	HNH endonuclease	0	3	1	1	7	6	1	0	8	1	3	4	1	0	3	0	10.4133	3.23092	1.05185	7.95218	4.89904	1.38129	0	9.66626	0.342349	1.36942	1.45594	0.230039	0	2.41425	0.47935	2.22079	1.21291	0.580975	2.12086	1.68309	0.73335	0.176373	2.31097	-0.00109771	0.688311	0.724677	-0.177084	-0.258557
B5M07_01960	CP020694 (Chromosome)	405769	406947	+	NAD(FAD)-utilizing dehydrogenase	1	0	6	20	13	25	8	15	15	57	31	28	83	32	23	3.83051	0	19.3855	21.037	14.7683	20.4126	11.0504	26.4801	18.1242	19.5139	14.1507	10.1916	19.0933	15.803	18.5093	2.95637	2.35674	4.11355	4.21251	3.86491	4.18445	3.59767	4.43807	4.06296	4.14334	3.82422	3.51135	4.12227	3.93205
B5M07_01965	CP020694 (Chromosome)	406944	407537	-	glutathione S-transferase	6	3	2	16	11	26	7	2	7	83	76	58	63	27	23	22.983	10.4133	6.46183	16.8296	12.4963	21.2292	9.66906	3.53068	8.45797	28.415	34.692	21.1112	14.4925	13.3338	18.5093	4.28719	3.58543	3.23693	4.00459	3.72158	4.23688	3.49478	2.78947	3.37683	4.54229	4.75113	4.23548	3.8603	3.77985
B5M07_01970	CP020694 (Chromosome)	407557	408555	-	DNA polymerase III subunit delta	4	1	0	13	12	7	3	4	4	138	182	139	128	81	39	15.322	3.47111	0	13.674	13.6323	5.71554	4.14388	7.06137	4.83313	47.2441	83.0782	50.594	29.445	40.0014	31.3853	3.94702	2.94658	2.38047	3.83654	3.83404	3.06566	2.87756	3.27883	2.96765	5.12223	5.74665	5.19684	4.61599	4.9395
B5M07_01975	CP020694 (Chromosome)	408552	409052	-	hypothetical protein	0	0	0	8	4	2	3	6	2	69	46	59	55	58	22	0	0	0	8.41479	4.5441	1.63301	4.14388	10.5921	2.41656	23.6221	20.9978	21.4751	12.6522	28.643	17.7045	1.83119	1.78549	1.75195	3.01717	2.49397	1.79618	2.43519	3.22333	2.06965	4.06855	3.9408	3.96702	3.42405	4.27076
B5M07_01980	CP020694 (Chromosome)	409039	411585	-	leucine--tRNA ligase	15	9	17	47	43	91	21	27	28	494	502	657	500	388	235	57.4576	31.24	54.9256	49.4369	48.8491	74.302	29.0072	47.6642	33.8319	169.12	229.15	239.138	115.02	191.612	189.116	6.0077	5.45304	5.96258	5.85159	5.84044	6.25641	5.35833	5.82033	5.49463	7.12408	7.45663	7.50411	6.71085	7.25978
B5M07_01985	CP020694 (Chromosome)	411668	412162	-	hypothetical protein	4	1	3	18	5	11	7	1	16	143	64	50	224	87	49	15.322	3.47111	9.69275	18.9333	5.68013	8.98157	9.66906	1.76534	19.3325	48.9559	29.2143	18.1993	51.5288	42.9645	39.4328	3.98478	3.00093	3.60412	4.18374	3.12564	3.48439	3.56318	2.55474	4.20376	5.18251	4.63019	4.14652	5.23977	5.03924
B5M07_01990	CP020694 (Chromosome)	412454	413404	+	porin	941	1344	1509	9161	12127	18378	5912	1320	6454	25968	22163	21337	42943	21271	6635	3604.51	4665.17	4875.45	9635.99	13776.6	15005.7	8166.22	2330.25	7798.25	8890.12	10116.8	7766.36	9878.58	10504.6	5339.52	12.1279	12.3824	12.4266	13.1308	13.5147	13.6079	12.9562	11.7147	12.908	13.0456	13.1826	12.9037	13.1572	13.2227
B5M07_01995	CP020694 (Chromosome)	413507	414160	+	YggS family pyridoxal phosphate enzyme	0	7	11	34	47	72	12	2	19	85	52	69	115	39	14	0	24.2978	35.5401	35.7629	53.3932	58.7884	16.5755	3.53068	22.9574	29.0997	23.7366	25.115	26.4545	19.2599	11.2665	2.75462	4.53889	4.91645	4.93995	5.36426	5.47171	4.17553	3.03888	4.48851	4.73142	4.52331	4.58069	4.63418	4.31514
B5M07_02000	CP020694 (Chromosome)	414150	414644	-	hypothetical protein	0	3	5	3	5	2	3	4	4	12	8	16	17	12	13	0	10.4133	16.1546	3.15555	5.68013	1.63301	4.14388	7.06137	4.83313	4.10819	3.65179	5.82377	3.91067	5.92614	10.4618	1.4658	2.91818	3.34889	1.97704	2.43523	1.54838	2.18373	2.6133	2.30167	2.15915	2.06487	2.464	2.11497	2.47827
B5M07_02005	CP020694 (Chromosome)	414641	415732	-	GTP cyclohydrolase II	9	26	8	15	11	8	25	18	9	58	46	35	90	33	18	34.4745	90.2489	25.8473	15.7777	12.4963	6.53205	34.5324	31.7762	10.8745	19.8562	20.9978	12.7395	20.7035	16.2969	14.4855	4.85719	5.89699	4.57424	4.10205	3.88839	3.33006	4.87914	4.79016	3.76715	4.32219	4.37789	3.8925	4.36391	4.12888
B5M07_02010	CP020694 (Chromosome)	415895	416581	+	DNA-binding response regulator	4	12	14	29	28	65	4	3	4	48	64	84	56	46	44	15.322	41.6533	45.2328	30.5036	31.8087	53.0729	5.52518	5.29603	4.83313	16.4327	29.2143	30.5748	12.8822	22.7169	35.409	4.11635	5.07115	5.1599	4.76858	4.81108	5.35466	3.26529	3.26543	3.16055	4.15192	4.72802	4.77562	3.91714	4.47204
B5M07_02015	CP020694 (Chromosome)	417060	417848	+	exodeoxyribonuclease III	2	9	6	12	28	23	9	11	20	90	96	78	114	84	74	7.66101	31.24	19.3855	12.6222	31.8087	18.7796	12.4317	19.4188	24.1656	30.8114	43.8215	28.3909	26.2245	41.483	59.5515	3.71404	4.85287	4.40459	3.99816	4.88026	4.36003	3.99261	4.39784	4.60558	4.85103	5.21627	4.76752	4.68737	5.15838
B5M07_02020	CP020694 (Chromosome)	417903	418823	+	thioredoxin	3	8	9	36	15	46	6	14	10	134	96	102	150	70	44	11.4915	27.7689	29.0782	37.8666	17.0404	37.5593	8.28777	24.7148	12.0828	45.8747	43.8215	37.1265	34.5059	34.5691	35.409	4.03318	4.77768	4.82211	5.09357	4.31031	5.08635	3.7069	4.66531	4.00535	5.29788	5.24896	5.07661	5.00158	5.00238
B5M07_02025	CP020694 (Chromosome)	418851	419495	+	ATP-dependent protease	6	8	15	44	60	182	40	25	31	160	137	204	123	73	61	22.983	27.7689	48.4637	46.2814	68.1616	148.604	55.2518	44.1336	37.4567	54.7758	62.5369	74.253	28.2949	36.0507	49.0898	4.9204	5.07889	5.60145	5.55478	5.9522	6.79211	5.73449	5.50789	5.3448	5.72688	5.86406	6.04453	5.06593	5.30429
B5M07_02030	CP020694 (Chromosome)	419492	419674	+	hypothetical protein	0	0	2	0	0	0	0	0	0	0	3	8	1	1	0	0	0	6.46183	0	0	0	0	0	0	0	1.36942	2.91188	0.230039	0.493845	0	-0.810411	-0.842456	0.435258	-1.23079	-1.20575	-1.31317	-1.14217	-1.06237	-1.18569	-1.44984	-0.404229	0.167026	-1.19517	-0.931275
B5M07_02035	CP020694 (Chromosome)	419685	420911	-	2-octaprenyl-6-methoxyphenyl hydroxylase	6	7	25	41	38	105	84	25	15	72	70	94	126	56	22	22.983	24.2978	80.7729	43.1258	43.169	85.7331	116.029	44.1336	18.1242	24.6491	31.9532	34.2146	28.985	27.6553	17.7045	4.771	4.81698	6.01157	5.36454	5.3654	6.08958	6.41635	5.38661	4.52876	4.80524	5.06162	5.13006	4.96375	4.91868
B5M07_02040	CP020694 (Chromosome)	420997	422331	+	amidase	12	4	13	18	5	13	18	17	12	115	48	56	70	44	30	45.9661	13.8844	42.0019	18.9333	5.68013	10.6146	24.8633	30.0108	14.4994	39.3701	21.9107	20.3832	16.1028	21.7292	24.1425	5.16773	4.02933	5.07869	4.29092	3.26875	3.75336	4.55758	4.74459	4.04086	5.03721	4.43389	4.36197	4.13007	4.42555
B5M07_02045	CP020694 (Chromosome)	422455	423636	+	aspartate aminotransferase	31	31	31	105	65	98	105	61	155	1454	1152	1312	1851	961	699	118.746	107.604	100.158	110.444	73.8417	80.0176	145.036	107.686	187.284	497.775	525.858	477.549	425.803	474.585	562.52	7.13762	7.04226	6.97344	7.06012	6.67868	6.75132	7.32971	7.03776	7.58863	8.6308	8.69114	8.58519	8.45986	8.57821
B5M07_02050	CP020694 (Chromosome)	423649	426564	+	cell division protein FtsK	9	10	38	432	392	590	430	61	471	3673	3921	4662	3517	1942	1041	34.4745	34.7111	122.775	454.399	445.322	481.739	593.957	107.686	569.101	1257.45	1789.83	1696.9	809.049	959.047	837.745	6.58086	6.57753	7.5471	8.8153	8.79431	8.87627	9.09684	7.42371	9.05156	9.91335	10.3094	10.2492	9.42899	9.61424
B5M07_02055	CP020694 (Chromosome)	426741	427346	+	cell envelope biogenesis protein LolA	6	11	4	52	77	94	17	13	24	75	141	131	91	59	63	22.983	38.1822	12.9237	54.6962	87.474	76.7516	23.482	22.9494	28.9988	25.6762	64.3628	47.6821	20.9336	29.1368	50.6993	4.75707	5.22734	4.28285	5.59917	6.09873	5.95975	4.75554	4.73764	4.95636	4.83308	5.77375	5.4587	4.6344	4.95829
B5M07_02060	CP020694 (Chromosome)	427418	428008	-	lytic transglycosylase	3	16	1	35	28	43	32	8	34	131	92	110	261	84	60	11.4915	55.5378	3.23092	36.8147	31.8087	35.1098	44.2014	14.1227	41.0816	44.8477	41.9956	40.0384	60.0403	41.483	48.285	4.15664	5.56497	3.45837	5.15251	5.00566	5.10483	5.33838	4.26044	5.26383	5.35739	5.28882	5.23985	5.66519	5.27601
B5M07_02065	CP020694 (Chromosome)	428315	428641	+	DNA-binding protein	13	14	29	13	24	18	15	19	16	145	91	92	194	100	105	49.7966	48.5956	93.6966	13.674	27.2646	14.6971	20.7194	33.5415	19.3325	49.6406	41.5391	33.4867	44.6277	49.3845	84.4988	5.49819	5.47459	6.16798	4.27066	4.9029	4.32643	4.64614	5.10682	4.58032	5.50688	5.32223	5.10328	5.39662	5.50096
B5M07_02070	CP020694 (Chromosome)	428678	430255	-	gamma-glutamyltransferase	16	16	12	17	22	21	20	27	32	31	26	40	79	46	13	61.2881	55.5378	38.771	17.8814	24.9926	17.1466	27.6259	47.6642	38.665	10.6128	11.8683	14.5594	18.1731	22.7169	10.4618	5.53331	5.43073	5.05655	4.29942	4.62416	4.25763	4.7234	5.28273	5.06746	3.80521	3.90979	4.09718	4.3085	4.52937
B5M07_02075	CP020694 (Chromosome)	430479	430943	-	serine/threonine protein kinase	0	0	0	0	0	0	0	0	0	0	0	0	0	0	0	0	0	0	0	0	0	0	0	0	0	0	0	0	0	0	0	0	0	0	0	0	0	0	0	0	0	0	0	0
B5M07_02080	CP020694 (Chromosome)	430948	431286	-	anti-anti-sigma factor	0	0	0	0	0	1	0	0	1	0	0	0	0	0	0	0	0	0	0	0	0.816506	0	0	1.20828	0	0	0	0	0	0	-1.8721	-1.88445	-1.89344	-2.03408	-2.02443	-1.81517	-1.99994	-1.96919	-1.76605	-2.14456	-2.13871	-2.14355	-2.15008	-2.12884
B5M07_02085	CP020694 (Chromosome)	431374	432546	+	acetyl-CoA acetyltransferase	12	11	16	24	12	26	8	13	22	94	66	117	91	47	19	45.9661	38.1822	51.6947	25.2444	13.6323	21.2292	11.0504	22.9494	26.5822	32.1808	30.1273	42.5863	20.9336	23.2107	15.2903	5.26186	5.07456	5.38847	4.66974	4.09205	4.49987	3.91863	4.57826	4.72073	4.91529	4.84761	5.20572	4.48324	4.58604
B5M07_02090	CP020694 (Chromosome)	432620	433078	+	diguanylate cyclase	3	3	1	3	6	10	3	12	7	14	34	40	42	14	6	11.4915	10.4133	3.23092	3.15555	6.81616	8.16506	4.14388	21.1841	8.45797	4.79288	15.5201	14.5594	9.66166	6.91383	4.8285	3.29417	3.21252	2.41351	2.26779	2.85703	3.01521	2.4739	3.92496	3.04612	2.54016	3.63943	3.57722	3.17623	2.86381
B5M07_02095	CP020694 (Chromosome)	433127	433774	+	RNA pseudouridine synthase	1	0	1	14	10	16	6	3	3	42	46	44	46	29	9	3.83051	0	3.23092	14.7259	11.3603	13.0641	8.28777	5.29603	3.62485	14.3787	20.9978	16.0154	10.5818	14.3215	7.24275	2.59665	1.93225	2.48605	3.62381	3.37116	3.50988	3.08216	2.72561	2.4316	3.61262	3.99668	3.72075	3.31203	3.60596
B5M07_02100	CP020694 (Chromosome)	433958	434611	+	peroxidase	17	34	17	35	44	99	31	33	86	117	134	352	151	151	59	65.1186	118.018	54.9256	36.8147	49.9852	80.8341	42.8201	58.2563	103.912	40.0548	61.1675	128.123	34.736	74.5706	47.4803	6.00027	6.61824	5.83112	5.43542	5.73453	6.22561	5.58309	5.88852	6.48958	5.51273	5.93762	6.71692	5.37319	6.14204
B5M07_02105	CP020694 (Chromosome)	434619	435371	-	hypothetical protein	0	2	1	32	27	65	18	4	4	41	36	46	40	26	8	0	6.94222	3.23092	33.6592	30.6727	53.0729	24.8633	7.06137	4.83313	14.0363	16.4331	16.7433	9.20158	12.84	6.438	2.27776	3.18176	2.73701	4.64568	4.54527	5.14532	4.32094	3.14993	2.83798	3.75417	3.91052	3.9302	3.34548	3.66627
B5M07_02110	CP020694 (Chromosome)	435424	436128	-	hypothetical protein	3	14	12	288	196	372	57	11	65	142	163	139	190	101	36	11.4915	48.5956	38.771	302.933	222.661	303.74	78.7338	19.4188	78.5383	48.6135	74.4052	50.594	43.7075	49.8783	28.971	4.57526	5.7315	5.51712	7.68796	7.34084	7.69177	6.21514	4.88828	6.21281	5.7225	6.15753	5.76266	5.6159	5.7487
B5M07_02115	CP020694 (Chromosome)	436190	438331	-	polyribonucleotide nucleotidyltransferase	69	88	138	1638	1517	3661	416	250	454	1069	767	765	1418	459	223	264.305	305.458	445.866	1722.93	1723.35	2989.23	574.619	441.336	548.56	365.971	350.115	278.449	326.196	226.675	179.459	8.32488	8.46622	8.84709	10.3058	10.306	10.9311	9.11044	8.83639	9.06184	8.64501	8.60032	8.37181	8.52905	8.1713
B5M07_02120	CP020694 (Chromosome)	438610	438879	-	30S ribosomal protein S15	1	6	1	94	56	122	4	8	26	93	17	48	148	22	5	3.83051	20.8267	3.23092	98.8738	63.6175	99.6137	5.52518	14.1227	31.4153	31.8384	7.76005	17.4713	34.0458	10.8646	4.02375	3.16244	4.33727	3.04669	6.01241	5.5187	6.02332	3.19744	3.97356	4.75989	4.78168	3.40938	4.1676	4.85344	3.71318
B5M07_02125	CP020694 (Chromosome)	439048	439974	-	type I secretion protein	1	1	0	4	3	2	7	5	2	4	2	8	10	6	2	3.83051	3.47111	0	4.2074	3.40808	1.63301	9.66906	8.82671	2.41656	1.3694	0.912948	2.91188	2.30039	2.96307	1.6095	1.66169	1.60525	0.808407	1.79509	1.62627	1.12513	2.5314	2.42178	1.38254	0.975902	0.768905	1.51352	1.32875	1.52651
B5M07_02130	CP020694 (Chromosome)	440100	440615	-	hypothetical protein	0	1	0	0	1	2	1	4	3	14	17	19	21	3	2	0	3.47111	0	0	1.13603	1.63301	1.38129	7.06137	3.62485	4.79288	7.76005	6.91572	4.83083	1.48153	1.6095	0.80154	1.53734	0.732971	0.354045	0.909311	1.07028	1.01673	2.15373	1.6157	1.88272	2.31484	2.21352	1.89542	0.989744
B5M07_02135	CP020694 (Chromosome)	440616	441542	-	tRNA pseudouridine(55) synthase TruB	3	1	1	16	3	12	3	3	5	45	34	31	44	13	8	11.4915	3.47111	3.23092	16.8296	3.40808	9.79807	4.14388	5.29603	6.04141	15.4057	15.5201	11.2836	10.1217	6.41998	6.438	3.28567	2.45067	2.40466	3.70001	2.31833	3.17677	2.46674	2.6577	2.74984	3.62724	3.6321	3.31795	3.21438	2.79116
B5M07_02140	CP020694 (Chromosome)	441621	442367	-	hypothetical protein	4	3	3	18	37	42	6	5	5	58	31	52	110	34	23	15.322	10.4133	9.69275	18.9333	42.033	34.2933	8.28777	8.82671	6.04141	19.8562	14.1507	18.9272	25.3043	16.7907	18.5093	3.96507	3.6445	3.58556	4.16625	4.9858	4.77466	3.41902	3.48094	3.165	4.21718	3.88322	4.169	4.46509	4.04979
B5M07_02145	CP020694 (Chromosome)	442364	442795	-	ribosome-binding factor A	5	6	5	11	19	39	5	9	19	89	43	30	167	33	12	19.1525	20.8267	16.1546	11.5703	21.5845	31.8437	6.90647	15.8881	22.9574	30.4691	19.6284	10.9196	38.4166	16.2969	9.657	4.22499	4.30336	4.07163	3.75657	4.34673	4.7445	3.33946	4.05193	4.4077	4.70332	4.25476	3.69093	4.94753	4.07184
B5M07_02150	CP020694 (Chromosome)	442893	443711	+	4-hydroxy-tetrahydrodipicolinate reductase	3	6	5	5	4	15	18	24	14	59	23	42	60	14	3	11.4915	20.8267	16.1546	5.25925	4.5441	12.2476	24.8633	42.3682	16.9159	20.1986	10.4989	15.2874	13.8024	6.91383	2.41425	3.5732	4.11511	3.87456	2.89922	2.7965	3.62427	4.32203	4.88123	3.93497	4.12303	3.47699	3.84154	3.741	3.09748
B5M07_02155	CP020694 (Chromosome)	443789	444148	+	dihydrodipicolinate reductase	3	0	2	1	15	6	8	8	0	0	15	12	13	4	8	11.4915	0	6.46183	1.05185	17.0404	4.89904	11.0504	14.1227	0	0	6.84711	4.36783	2.99051	1.97538	6.438	2.87441	1.20886	2.37555	1.20185	3.39254	2.18969	2.93414	3.16754	0.762502	0.247907	2.50454	2.09359	1.76633	1.46787
B5M07_02160	CP020694 (Chromosome)	444155	444355	-	DUF1674 domain-containing protein	0	3	0	1	0	0	0	0	1	2	0	1	1	2	0	0	10.4133	0	1.05185	0	0	0	0	1.20828	0.684698	0	0.363986	0.230039	0.98769	0	-0.711779	1.15506	-0.771931	-0.511723	-1.14127	-1.25316	-1.0722	-0.985509	-0.446865	-0.697954	-1.36708	-0.97458	-1.14434	-0.502636
B5M07_02165	CP020694 (Chromosome)	444555	445826	+	16S rRNA methyltransferase	12	7	12	10	21	15	4	15	11	59	19	28	116	26	11	45.9661	24.2978	38.771	10.5185	23.8566	12.2476	5.52518	26.4801	13.2911	20.1986	8.673	10.1916	26.6846	12.84	8.85225	5.06265	4.40946	4.88869	3.62754	4.40979	3.76224	3.12174	4.51008	3.84162	4.24713	3.4409	3.58486	4.5329	3.80317
B5M07_02170	CP020694 (Chromosome)	445830	446579	-	hypothetical protein	0	2	1	5	2	1	1	3	1	11	6	4	8	5	2	0	6.94222	3.23092	5.25925	2.27205	0.816506	1.38129	5.29603	1.20828	3.76584	2.73884	1.45594	1.84032	2.46922	1.6095	0.727866	1.98253	1.42252	1.86557	1.22149	0.673069	0.951156	1.83493	0.878754	1.61637	1.35703	0.913848	1.06263	1.27874
B5M07_02175	CP020694 (Chromosome)	446745	448493	+	heparinase	28	13	15	33	24	21	36	25	32	123	99	88	188	100	51	107.254	45.1244	48.4637	34.711	27.2646	17.1466	49.7266	44.1336	38.665	42.1089	45.1909	32.0307	43.2474	49.3845	41.0423	6.35909	5.45774	5.52921	5.19719	4.96331	4.53207	5.55868	5.43703	5.3045	5.39018	5.46222	5.11538	5.41743	5.55334
B5M07_02180	CP020694 (Chromosome)	448510	450096	+	bifunctional phosphoribosylaminoimidazolecarboxamide formyltransferase/IMP cyclohydrolase	4	4	14	57	27	72	23	19	32	196	133	127	339	132	88	15.322	13.8844	45.2328	59.9554	30.6727	58.7884	31.7698	33.5415	38.665	67.1004	60.711	46.2262	77.9834	65.1875	70.818	4.53986	4.45821	5.48571	5.776	5.10214	5.75621	5.1374	5.19152	5.32917	5.89642	5.79086	5.50892	6.05644	5.86539
B5M07_02185	CP020694 (Chromosome)	450112	450600	+	signal peptidase II	0	0	1	11	3	13	0	10	3	24	19	19	35	9	14	0	0	3.23092	11.5703	3.40808	10.6146	0	17.6534	3.62485	8.21637	8.673	6.91572	8.05138	4.4446	11.2665	1.53713	1.49574	2.12338	3.14011	2.08444	3.0628	1.0942	3.54302	2.13144	2.82857	2.87753	2.66577	2.81176	2.27264
B5M07_02190	CP020694 (Chromosome)	450653	451165	+	hypothetical protein	10	3	5	17	21	16	33	18	32	86	34	68	157	46	36	38.3051	10.4133	16.1546	17.8814	23.8566	13.0641	45.5827	31.7762	38.665	29.442	15.5201	24.751	36.1162	22.7169	28.971	5.05007	3.90036	4.24126	4.31147	4.58895	4.01935	5.24667	4.87251	5.07621	4.80074	4.17148	4.62529	5.01163	4.54
B5M07_02195	CP020694 (Chromosome)	451230	452576	+	peptidase M16	7	14	23	20	49	87	14	6	20	155	125	161	181	88	38	26.8135	48.5956	74.3111	21.037	55.6653	71.036	19.3381	10.5921	24.1656	53.0641	57.0592	58.6017	41.6371	43.4583	30.5805	4.92449	5.4942	5.93581	4.67797	5.64138	5.90027	4.6059	4.11693	4.80931	5.59433	5.66997	5.69841	5.34351	5.38705
B5M07_02200	CP020694 (Chromosome)	452573	453895	+	peptidase M16	1	0	5	19	24	47	9	5	8	96	147	194	134	74	102	3.83051	0	16.1546	19.9851	27.2646	38.3758	12.4317	8.82671	9.66626	32.8655	67.1016	70.6132	30.8253	36.5445	82.0845	3.29259	2.74915	4.19769	4.38039	4.68808	5.0423	3.94389	3.67114	3.72351	4.88373	5.64564	5.7025	4.81787	4.99348
B5M07_02205	CP020694 (Chromosome)	453951	456296	-	aldehyde dehydrogenase	53	42	49	78	89	143	100	147	195	505	327	572	559	327	181	203.017	145.787	158.315	82.0442	101.106	116.76	138.129	259.505	235.615	172.886	149.267	208.2	128.592	161.487	145.66	7.55332	7.21129	7.2955	6.6374	6.84176	6.98488	7.15566	7.81586	7.71327	7.38736	7.23494	7.58271	7.08203	7.31633
B5M07_02210	CP020694 (Chromosome)	456341	457354	-	deoxyribose-phosphate aldolase	31	16	51	40	26	57	31	63	35	166	116	143	236	115	48	118.746	55.5378	164.777	42.074	29.5367	46.5408	42.8201	111.217	42.2899	56.8299	52.951	52.0499	54.2893	56.7922	38.628	6.59868	5.81318	6.95687	5.53521	5.19736	5.6343	5.55369	6.53576	5.54084	5.83548	5.76352	5.74602	5.78874	5.83483
B5M07_02215	CP020694 (Chromosome)	457530	458519	+	manganese transporter	27	79	68	610	566	396	131	54	122	433	497	619	1277	1043	822	103.424	274.218	219.702	641.628	642.991	323.336	180.95	95.3285	147.41	148.237	226.867	225.307	293.76	515.08	661.505	7.12867	8.08315	7.85615	8.99455	8.99682	8.25578	7.65945	7.04451	7.45638	7.46008	7.8877	7.8806	8.15525	8.75451
B5M07_02220	CP020694 (Chromosome)	458523	459317	+	manganese ABC transporter ATP-binding protein	19	22	42	399	290	200	64	54	84	156	131	159	184	178	254	72.7796	76.3645	135.698	419.688	329.448	163.301	88.4029	95.3285	101.496	53.4064	59.7981	57.8737	42.3273	87.9044	204.407	6.35874	6.40445	6.98525	8.21915	7.94847	7.18364	6.54609	6.62268	6.68627	6.04572	6.15589	6.12357	5.82411	6.53932
B5M07_02225	CP020694 (Chromosome)	459314	460519	+	zinc ABC transporter permease	22	32	36	657	634	276	101	86	157	114	143	201	240	173	194	84.2711	111.076	116.313	691.065	720.241	225.356	139.511	151.819	189.7	39.0278	65.2758	73.1611	55.2095	85.4352	156.122	6.61255	6.88253	6.9285	8.85949	8.90537	7.61927	7.11341	7.20089	7.4351	5.87894	6.35387	6.46359	6.19342	6.61631
B5M07_02230	CP020694 (Chromosome)	460516	461445	+	zinc ABC transporter permease	7	9	7	471	413	197	59	66	179	71	89	162	196	126	123	26.8135	31.24	22.6164	495.421	469.179	160.852	81.4964	116.513	216.282	24.3068	40.6262	58.9657	45.0877	62.2245	98.9843	5.32897	5.45074	5.18179	8.32569	8.26336	7.06913	6.35046	6.72193	7.3918	5.17783	5.65651	6.02147	5.75558	6.07578
B5M07_02235	CP020694 (Chromosome)	461729	463615	+	DNA mismatch repair protein MutL	17	13	10	28	21	44	26	41	27	86	47	40	180	66	14	65.1186	45.1244	32.3092	29.4518	23.8566	35.9263	35.9137	72.379	32.6236	29.442	21.4543	14.5594	41.4071	32.5938	11.2665	5.715	5.3358	5.00494	4.91343	4.70827	5.11289	5.11148	5.84159	5.01522	4.91215	4.60106	4.23458	5.26033	5.01462
B5M07_02240	CP020694 (Chromosome)	463612	464856	+	recombinase RmuC	6	4	8	18	15	19	12	8	11	68	48	47	85	21	36	22.983	13.8844	25.8473	18.9333	17.0404	15.5136	16.5755	14.1227	13.2911	23.2797	21.9107	17.1073	19.5534	10.3707	28.971	4.39734	3.9454	4.51434	4.22055	4.11899	4.02849	4.09323	3.94734	3.88732	4.42862	4.36687	4.12151	4.2537	3.65043
B5M07_02245	CP020694 (Chromosome)	464857	465870	+	serine/threonine dehydratase	14	14	11	23	49	79	59	42	69	65	56	123	108	44	24	53.6271	48.5956	35.5401	24.1925	55.6653	64.504	81.4964	74.1444	83.3715	22.2527	25.5625	44.7702	24.8443	21.7292	19.314	5.61853	5.51993	5.21282	4.83666	5.66501	5.82056	6.06636	5.96368	6.09161	4.74941	4.88332	5.44186	4.85364	4.729
B5M07_02250	CP020694 (Chromosome)	466007	467326	+	cyclopropane-fatty-acyl-phospholipid synthase	7	6	0	26	32	31	12	11	31	71	81	78	104	49	64	26.8135	20.8267	0	27.3481	36.3528	25.3117	16.5755	19.4188	37.4567	24.3068	36.9744	28.3909	23.9241	24.1984	51.504	4.69175	4.45683	2.77261	4.71699	5.00627	4.64007	4.23551	4.38536	5.03674	4.59986	5.02819	4.7567	4.58395	4.59537
B5M07_02255	CP020694 (Chromosome)	467323	468111	+	cyclopropane-fatty-acyl-phospholipid synthase	7	5	5	26	9	35	19	17	23	39	59	72	100	35	32	26.8135	17.3556	16.1546	27.3481	10.2242	28.5777	26.2446	30.0108	27.7905	13.3516	26.932	26.207	23.0039	17.2846	25.752	4.6469	4.24772	4.18393	4.6769	3.75986	4.72242	4.63442	4.767	4.69238	3.97817	4.66384	4.63653	4.50544	4.22496
B5M07_02260	CP020694 (Chromosome)	468108	469343	+	sugar:cation symporter	1	7	0	6	11	23	8	20	31	42	38	52	64	34	11	3.83051	24.2978	0	6.31109	12.4963	18.7796	11.0504	35.3068	37.4567	14.3787	17.346	18.9272	14.7225	16.7907	8.85225	2.9265	4.31399	2.28382	3.09371	3.68891	4.08485	3.57766	4.7243	4.79593	3.82279	4.00825	4.0968	3.84633	3.97553
B5M07_02265	CP020694 (Chromosome)	469340	469906	+	hypothetical protein	1	5	1	19	32	27	13	5	9	48	39	54	102	58	37	3.83051	17.3556	3.23092	19.9851	36.3528	22.0457	17.9568	8.82671	10.8745	16.4327	17.8025	19.6552	23.464	28.643	29.7758	3.07438	4.09565	2.96116	4.2364	4.8484	4.33563	4.13067	3.5008	3.66509	4.04519	4.12405	4.22295	4.40319	4.60621
B5M07_02270	CP020694 (Chromosome)	469903	470634	+	short-chain dehydrogenase	4	3	3	11	9	18	9	7	10	22	22	16	45	12	9	15.322	10.4133	9.69275	11.5703	10.2242	14.6971	12.4317	12.3574	12.0828	7.53168	10.0424	5.82377	10.3518	5.92614	7.24275	3.69139	3.35499	3.29596	3.45688	3.3419	3.68922	3.52207	3.51345	3.49661	3.05894	3.32567	2.83217	3.35468	2.8519
B5M07_02275	CP020694 (Chromosome)	470637	471692	-	saccharopine dehydrogenase	0	0	17	14	11	14	10	8	19	87	43	88	144	94	65	0	0	54.9256	14.7259	12.4963	11.4311	13.8129	14.1227	22.9574	29.7844	19.6284	32.0307	33.1257	46.4214	52.3088	2.64291	2.59127	5.32168	3.99996	3.84927	3.76286	3.94363	3.96754	4.43099	4.70282	4.27684	4.77853	4.81508	5.17123
B5M07_02280	CP020694 (Chromosome)	471689	472312	-	glutathione S-transferase	0	0	2	4	2	2	1	0	4	25	11	11	46	15	1	0	0	6.46183	4.2074	2.27205	1.63301	1.38129	0	4.83313	8.55872	5.02121	4.00384	10.5818	7.40767	0.80475	1.01141	0.977273	2.17803	1.89225	1.44539	1.22787	1.19048	0.732092	2.00251	2.55809	2.05986	1.8657	2.7677	2.4137
B5M07_02285	CP020694 (Chromosome)	472339	472989	-	phosphoglycerate mutase	2	3	2	6	9	10	1	6	2	56	39	28	98	45	25	7.66101	10.4133	6.46183	6.31109	10.2242	8.16506	1.38129	10.5921	2.41656	19.1715	17.8025	10.1916	22.5439	22.223	20.1188	3.1255	3.36323	2.99571	2.92607	3.34889	3.14324	2.04673	3.38034	2.27399	3.97359	3.89586	3.34617	4.14338	4.12329
B5M07_02290	CP020694 (Chromosome)	473152	475917	+	formate dehydrogenase subunit alpha	14	12	9	39	34	46	25	29	30	52	52	59	134	84	39	53.6271	41.6533	29.0782	41.0221	38.6249	37.5593	34.5324	51.1949	36.2485	17.8021	23.7366	21.4751	30.8253	41.483	31.3853	5.54125	5.28655	4.93837	5.27724	5.21581	5.18796	5.10295	5.50269	5.15161	4.45618	4.73166	4.63422	4.98863	5.29013
B5M07_02295	CP020694 (Chromosome)	475933	477126	+	Zn-dependent hydrolase	10	5	3	56	32	26	24	27	48	119	104	146	180	114	41	38.3051	17.3556	9.69275	58.9036	36.3528	21.2292	33.1511	47.6642	57.9975	40.7395	47.4733	53.1419	41.4071	56.2983	32.9948	5.24077	4.52855	4.09326	5.68576	5.18968	4.66593	5.0983	5.46309	5.66877	5.30555	5.46287	5.58071	5.32238	5.6407
B5M07_02300	CP020694 (Chromosome)	477133	477849	-	DNA-binding response regulator	1	1	0	4	4	6	10	6	9	75	51	25	73	40	21	3.83051	3.47111	0	4.2074	4.5441	4.89904	13.8129	10.5921	10.8745	25.6762	23.2802	9.09964	16.7929	19.7538	16.8998	2.64885	2.58415	1.95648	2.56688	2.62851	2.67017	3.59423	3.34063	3.36793	4.24614	4.1406	3.20276	3.80756	3.96899
B5M07_02305	CP020694 (Chromosome)	477846	479756	-	hybrid sensor histidine kinase/response regulator	3	6	3	11	13	14	20	4	8	161	183	60	206	116	70	11.4915	20.8267	9.69275	11.5703	14.7683	11.4311	27.6259	7.06137	9.66626	55.1182	83.5347	21.8391	47.3881	57.286	56.3325	3.94286	4.43574	3.80311	3.88415	4.10497	3.86714	4.70906	3.51752	3.73534	5.43929	5.89281	4.4752	5.27802	5.47954
B5M07_02310	CP020694 (Chromosome)	479871	480293	+	cytochrome C	1	2	0	0	0	0	0	0	0	0	7	2	1	3	1	3.83051	6.94222	0	0	0	0	0	0	0	0	3.19532	0.727971	0.230039	1.48153	0.80475	0.216318	0.883098	-0.580562	-0.992625	-0.964356	-1.05715	-0.892577	-0.802497	-0.941714	-1.23829	0.537306	-0.499165	-0.975676	-0.0732511
B5M07_02315	CP020694 (Chromosome)	480470	482440	+	long-chain fatty acid--CoA ligase	4	12	9	273	151	503	50	101	123	28	20	14	42	10	3	15.322	41.6533	29.0782	287.155	171.54	410.702	69.0647	178.3	148.619	9.58577	9.12948	5.0958	9.66166	4.93845	2.41425	4.42647	5.32437	4.97452	7.4599	6.8677	7.87851	5.85902	6.90799	6.70497	3.9237	3.88946	3.42103	3.92367	3.41607
B5M07_02320	CP020694 (Chromosome)	482491	483309	+	ABC transporter ATP-binding protein	8	15	3	228	205	435	82	105	171	4	9	7	20	9	3	30.644	52.0667	9.69275	239.822	232.885	355.18	113.266	185.361	206.616	1.3694	4.10826	2.5479	4.60079	4.4446	2.41425	4.95091	5.4866	3.97788	7.20681	7.17229	7.66695	6.3481	6.90495	7.03345	2.51237	3.17632	2.84651	3.22305	3.23746
B5M07_02325	CP020694 (Chromosome)	483369	484358	+	branched-chain amino acid ABC transporter permease	12	6	6	277	273	426	76	103	189	8	12	12	16	6	5	45.9661	20.8267	19.3855	291.362	310.135	347.832	104.978	181.83	228.365	2.73879	5.47769	4.36783	3.68063	2.96307	4.02375	5.39805	4.64288	4.57757	7.46227	7.53468	7.67038	6.29704	6.91398	7.17899	2.95586	3.44696	3.26875	3.12378	3.03919
B5M07_02330	CP020694 (Chromosome)	484422	485498	+	branched-chain amino acid ABC transporter permease	4	2	2	316	315	312	107	80	170	7	16	20	21	13	6	15.322	6.94222	6.46183	332.384	357.848	254.75	147.799	141.227	205.408	2.39644	7.30358	7.27971	4.83083	6.41998	4.8285	4.34065	3.78098	3.72629	7.59049	7.6768	7.28096	6.65138	6.59711	7.02941	2.81054	3.61783	3.6075	3.26488	3.5175
B5M07_02335	CP020694 (Chromosome)	485581	486861	+	ABC transporter permease	15	20	20	1523	1548	2409	381	154	595	38	22	45	69	34	14	57.4576	69.4222	64.6183	1601.97	1758.57	1966.96	526.273	271.863	718.928	13.0093	10.0424	16.3793	15.8727	16.7907	11.2665	6.1819	6.35761	6.28842	9.80639	9.91693	10.0503	8.51184	7.77263	8.86917	4.86975	4.69146	5.04836	5.01703	5.07392
B5M07_02340	CP020694 (Chromosome)	486929	487765	+	ABC transporter ATP-binding protein	14	11	4	325	335	377	86	42	104	15	19	16	19	9	8	53.6271	38.1822	12.9237	341.851	380.569	307.823	118.791	74.1444	125.661	5.13523	8.673	5.82377	4.37075	4.4446	6.438	5.58157	5.23894	4.28214	7.66455	7.78971	7.54339	6.45415	5.93448	6.51797	3.42376	3.84695	3.5211	3.28861	3.34267
B5M07_02345	CP020694 (Chromosome)	487857	489083	+	AMP-dependent synthetase	5	4	0	141	130	188	20	18	23	8	4	3	24	12	5	19.1525	13.8844	0	148.311	147.683	153.503	27.6259	31.7762	27.7905	2.73879	1.8259	1.09196	5.52095	5.92614	4.02375	4.12911	3.83321	2.31499	6.41207	6.40624	6.45468	4.52367	4.66706	4.53216	2.40152	2.16376	1.85357	2.95199	3.03294
B5M07_02350	CP020694 (Chromosome)	489138	490808	+	iron ABC transporter permease	5	5	15	45	33	84	46	59	39	86	79	64	131	65	24	19.1525	17.3556	48.4637	47.3332	37.4889	68.5865	63.5396	104.155	47.123	29.442	36.0614	23.2951	30.1352	32.0999	19.314	4.62094	4.53525	5.48084	5.46297	5.22554	5.85269	5.76884	6.29751	5.45795	4.9831	5.18631	4.75438	5.00577	5.06954
B5M07_02355	CP020694 (Chromosome)	491099	492115	-	Fe(3+) ABC transporter substrate-binding protein	7	21	42	50	43	77	12	8	13	246	523	537	382	670	193	26.8135	72.8933	135.698	52.5925	48.8491	62.871	16.5755	14.1227	15.7077	84.2178	238.736	195.46	87.8751	330.876	155.317	5.25418	6.17895	6.82794	5.84979	5.77721	6.02836	4.80771	4.69828	4.75849	6.32928	7.45653	7.23475	6.37388	7.82366
B5M07_02360	CP020694 (Chromosome)	492245	493120	-	glutathione-dependent disulfide-bond oxidoreductase	0	2	0	12	18	46	4	5	5	70	134	192	97	71	22	0	6.94222	0	12.6222	20.4485	37.5593	5.52518	8.82671	6.04141	23.9644	61.1675	69.8852	22.3138	35.063	17.7045	2.46177	3.32093	2.3733	3.75575	4.22444	4.86115	3.07103	3.45102	3.1279	4.39351	5.39832	5.54766	4.32084	4.79202
B5M07_02365	CP020694 (Chromosome)	493248	493373	-	50S ribosomal protein L36	0	0	0	0	0	0	0	0	0	9	2	0	6	0	3	0	0	0	0	0	0	0	0	0	3.08114	0.912948	0	1.38024	0	2.41425	-0.777094	-0.804682	-0.824762	-1.139	-1.11745	-1.19842	-1.06271	-0.994011	-1.10018	0.101639	-0.646885	-1.28026	-0.416667	-1.25241
B5M07_02370	CP020694 (Chromosome)	493449	493523	-	#N/A	0	0	0	0	0	0	0	1	0	1	0	0	7	0	0	0	0	0	0	0	0	0	1.76534	0	0.342349	0	0	1.61028	0	0	-1.43156	-1.45026	-1.46388	-1.67697	-1.66235	-1.72506	-1.62523	-1.19889	-1.65064	-1.56822	-1.80141	-1.81055	-0.988711	-1.79794
B5M07_02375	CP020694 (Chromosome)	493669	494529	+	N-formylglutamate amidohydrolase	31	19	24	27	57	70	54	62	59	95	72	125	101	67	59	118.746	65.9511	77.542	28.3999	64.7535	57.1554	74.5899	109.451	71.2886	32.5231	32.8661	45.4982	23.234	33.0876	47.4803	6.56555	5.94847	6.11587	5.11851	5.93376	5.80565	6.08034	6.48603	6.03348	5.24123	5.25228	5.57366	4.92064	5.25907
B5M07_02380	CP020694 (Chromosome)	494531	495784	-	DNA polymerase IV	13	29	36	10	15	18	7	9	16	21	17	26	19	9	5	49.7966	100.662	116.313	10.5185	17.0404	14.6971	9.66906	15.8881	19.3325	7.18933	7.76005	9.46362	4.37075	4.4446	4.02375	5.11757	5.9185	6.08712	3.5701	4.0299	3.88508	3.50039	3.95982	4.15527	3.20635	3.27978	3.45936	2.76882	2.81075
B5M07_02385	CP020694 (Chromosome)	495845	496267	+	DNA mismatch repair protein MutT	0	1	0	1	0	0	1	1	2	2	2	2	6	4	2	0	3.47111	0	1.05185	0	0	1.38129	1.76534	2.41656	0.684698	0.912948	0.727971	1.38024	1.97538	1.6095	-0.0486363	0.651266	-0.111295	0.0967164	-0.451669	-0.522751	0.223075	0.33973	0.563155	-0.115222	0.0231216	-0.0867003	0.25496	0.474436
B5M07_02390	CP020694 (Chromosome)	496461	497156	-	orotidine 5'-phosphate decarboxylase	0	0	13	24	29	51	4	0	3	17	13	4	9	7	4	0	0	42.0019	25.2444	32.9448	41.6418	5.52518	0	3.62485	5.81993	5.93416	1.45594	2.07035	3.45691	3.219	1.61102	1.56602	4.54676	4.04193	4.3334	4.60578	2.52359	1.24406	2.18445	2.56427	2.58273	1.45671	1.67356	2.1089
B5M07_02395	CP020694 (Chromosome)	497418	497732	-	orotidine 5-phosphate decarboxylase	26	41	193	249	233	429	34	46	45	3	55	86	17	8	29	99.5931	142.316	623.567	261.91	264.694	350.281	46.964	81.2057	54.3727	1.02705	25.1061	31.3028	3.91067	3.95076	23.3378	6.40605	6.79387	8.48414	7.48603	7.49772	7.81938	5.63328	6.19597	5.78094	2.92162	5.01826	5.22822	3.51047	3.56659
B5M07_02400	CP020694 (Chromosome)	498087	500702	+	ATP-dependent chaperone ClpB	175	161	175	93	119	236	136	168	206	380	682	1356	317	226	229	670.338	558.849	565.41	97.822	135.187	192.695	187.856	296.577	248.906	130.093	311.315	493.564	72.9225	111.609	184.288	8.99629	8.79534	8.80843	6.9999	7.31185	7.66647	7.64091	8.11369	7.93026	7.27235	8.16566	8.66208	6.72321	7.12354
B5M07_02405	CP020694 (Chromosome)	500777	501211	-	DUF302 domain-containing protein	7	4	1	5	5	11	7	8	6	12	15	24	19	15	10	26.8135	13.8844	3.23092	5.25925	5.68013	8.98157	9.66906	14.1227	7.24969	4.10819	6.84711	8.73565	4.37075	7.40767	8.0475	4.12252	3.46811	2.40749	2.6367	2.70095	3.09942	3.16299	3.51599	2.90675	2.40678	2.85116	3.07614	2.45201	2.92281
B5M07_02410	CP020694 (Chromosome)	501334	502239	+	mononuclear molybdenum enzyme YedY	6	0	4	16	32	48	16	12	14	17	34	46	31	28	24	22.983	0	12.9237	16.8296	36.3528	39.1923	22.1007	21.1841	16.9159	5.81993	15.5201	16.7433	7.13122	13.8277	19.314	4.31421	2.42051	3.78982	4.02902	4.81416	4.89868	4.29638	4.25099	4.03356	3.05097	3.9509	4.02585	3.22004	3.8387
B5M07_02415	CP020694 (Chromosome)	502313	502951	+	sulfoxide reductase heme-binding subunit YedZ	1	8	3	8	12	21	9	12	6	30	17	18	33	23	7	3.83051	27.7689	9.69275	8.41479	13.6323	17.1466	12.4317	21.1841	7.24969	10.2705	7.76005	6.55174	7.5913	11.3584	5.63325	2.71769	4.30167	3.31311	3.18108	3.62752	3.85759	3.53747	4.05508	3.05482	3.36082	3.10102	2.94752	3.07708	3.45677
B5M07_02420	CP020694 (Chromosome)	503577	505045	+	#N/A	0	0	0	0	0	0	0	0	0	0	0	0	0	0	0	0	0	0	0	0	0	0	0	0	0	0	0	0	0	0	0	0	0	0	0	0	0	0	0	0	0	0	0	0
B5M07_02425	CP020694 (Chromosome)	505187	505262	+	#N/A	0	0	0	0	0	0	0	0	0	0	0	0	0	0	0	0	0	0	0	0	0	0	0	0	0	0	0	0	0	0	0	0	0	0	0	0	0	0	0	0	0	0	0	0
B5M07_02430	CP020694 (Chromosome)	505431	505507	+	#N/A	0	0	0	0	0	0	0	0	0	0	0	0	0	0	0	0	0	0	0	0	0	0	0	0	0	0	0	0	0	0	0	0	0	0	0	0	0	0	0	0	0	0	0	0
B5M07_02435	CP020694 (Chromosome)	505935	508777	+	#N/A	0	0	0	0	0	0	0	0	0	0	0	0	0	0	0	0	0	0	0	0	0	0	0	0	0	0	0	0	0	0	0	0	0	0	0	0	0	0	0	0	0	0	0	0
B5M07_02445	CP020694 (Chromosome)	509264	509340	+	#N/A	3	5	0	0	0	0	2	1	0	7	0	4	6	0	0	11.4915	17.3556	0	0	0	0	2.76259	1.76534	0	2.39644	0	1.45594	1.38024	0	0	1.95003	2.4823	-0.106628	-0.550171	-0.525294	-0.633219	0.774772	0.41677	-0.505532	0.763959	-0.825408	0.354789	0.320569	-0.799653
B5M07_02450	CP020694 (Chromosome)	509297	510178	-	hypothetical protein	0	0	0	0	0	0	0	0	0	9	1	3	3	3	0	0	0	0	0	0	0	0	0	0	3.08114	0.456474	1.09196	0.690118	1.48153	0	-0.8032	-0.829154	-0.848045	-1.14368	-1.1234	-1.19903	-1.0719	-1.00727	-1.10715	0.0339765	-0.923439	-0.592669	-0.785597	-0.445662
B5M07_02460	CP020694 (Chromosome)	511072	511308	-	hypothetical protein	0	0	0	0	0	0	0	0	0	0	0	0	0	0	0	0	0	0	0	0	0	0	0	0	0	0	0	0	0	0	0	0	0	0	0	0	0	0	0	0	0	0	0	0
B5M07_02465	CP020694 (Chromosome)	511321	511578	-	hypothetical protein	0	0	0	0	0	6	0	0	5	0	0	1	2	3	0	0	0	0	0	0	4.89904	0	0	6.04141	0	0	0.363986	0.460079	1.48153	0	-0.615723	-0.649311	-0.673758	-1.05635	-1.0301	0.720342	-0.963456	-0.879819	0.865151	-1.2688	-1.2234	-0.868937	-0.795063	-0.185752
B5M07_02470	CP020694 (Chromosome)	511593	511787	-	hypothetical protein	0	0	0	0	0	0	0	0	0	0	0	0	0	0	0	0	0	0	0	0	0	0	0	0	0	0	0	0	0	0	0	0	0	0	0	0	0	0	0	0	0	0	0	0
B5M07_02475	CP020694 (Chromosome)	512515	512736	-	hypothetical protein	0	0	0	0	0	0	2	0	0	0	0	0	0	0	0	0	0	0	0	0	0	2.76259	0	0	0	0	0	0	0	0	-1.85215	-1.86757	-1.8788	-2.05447	-2.04241	-2.09411	-1.38567	-1.97341	-2.03276	-2.19928	-2.18514	-2.19756	-2.20884	-2.17282
B5M07_02480	CP020694 (Chromosome)	512821	513045	-	hypothetical protein	0	0	0	0	0	0	0	0	0	0	0	0	1	0	0	0	0	0	0	0	0	0	0	0	0	0	0	0.230039	0	0	-2.27419	-2.276	-2.27732	-2.29793	-2.29652	-2.30258	-2.29293	-2.28842	-2.29539	-2.31565	-2.31326	-2.31561	-2.29461	-2.31182
B5M07_02485	CP020694 (Chromosome)	513038	513280	-	hypothetical protein	0	0	0	0	0	0	0	0	0	0	0	0	0	0	0	0	0	0	0	0	0	0	0	0	0	0	0	0	0	0	0	0	0	0	0	0	0	0	0	0	0	0	0	0
B5M07_02490	CP020694 (Chromosome)	513282	513494	-	hypothetical protein	0	0	0	0	0	0	0	0	0	0	0	0	4	0	0	0	0	0	0	0	0	0	0	0	0	0	0	0.920158	0	0	-1.94814	-1.95465	-1.95939	-2.03357	-2.02848	-2.05031	-2.01556	-1.99934	-2.0244	-2.08767	-2.08643	-2.08743	-1.85118	-2.08354
B5M07_02495	CP020694 (Chromosome)	513491	515338	-	hypothetical protein	1	0	0	2	2	2	0	0	0	9	1	1	3	1	4	3.83051	0	0	2.1037	2.27205	1.63301	0	0	0	3.08114	0.456474	0.363986	0.690118	0.493845	3.219	0.647259	-0.133604	-0.160288	0.448424	0.494787	0.299353	-0.468445	-0.385194	-0.498668	0.793152	-0.307844	-0.394454	-0.166034	-0.276427
B5M07_02500	CP020694 (Chromosome)	515471	515791	-	hypothetical protein	0	0	0	0	0	0	0	0	0	0	0	0	0	0	0	0	0	0	0	0	0	0	0	0	0	0	0	0	0	0	0	0	0	0	0	0	0	0	0	0	0	0	0	0
B5M07_02505	CP020694 (Chromosome)	515788	515967	-	hypothetical protein	0	0	0	0	0	0	0	0	0	0	0	0	0	0	0	0	0	0	0	0	0	0	0	0	0	0	0	0	0	0	0	0	0	0	0	0	0	0	0	0	0	0	0	0
B5M07_02510	CP020694 (Chromosome)	515964	516182	-	hypothetical protein	0	0	0	0	0	0	0	0	0	0	0	0	0	0	0	0	0	0	0	0	0	0	0	0	0	0	0	0	0	0	0	0	0	0	0	0	0	0	0	0	0	0	0	0
B5M07_02515	CP020694 (Chromosome)	516182	516469	-	hypothetical protein	0	0	0	0	0	0	0	0	0	0	0	0	0	0	0	0	0	0	0	0	0	0	0	0	0	0	0	0	0	0	0	0	0	0	0	0	0	0	0	0	0	0	0	0
B5M07_02520	CP020694 (Chromosome)	516466	516732	-	hypothetical protein	3	0	0	0	0	3	0	0	0	1	0	2	0	0	1	11.4915	0	0	0	0	2.44952	0	0	0	0.342349	0	0.727971	0	0	0.80475	1.19129	-0.844163	-0.869909	-1.27282	-1.24518	0.0416133	-1.17499	-1.08692	-1.22304	-1.09776	-1.49337	-0.74615	-1.62082	-1.47751
B5M07_02525	CP020694 (Chromosome)	517338	517652	-	transcriptional regulator	0	1	0	1	0	3	2	1	6	4	4	4	27	5	0	0	3.47111	0	1.05185	0	2.44952	2.76259	1.76534	7.24969	1.3694	1.8259	1.45594	6.21106	2.46922	0	0.456208	1.20016	0.385239	0.564295	0.0353796	1.05598	1.12175	0.836915	1.94129	0.666165	0.857164	0.705933	1.87329	1.07301
B5M07_02530	CP020694 (Chromosome)	517703	517924	+	hypothetical protein	0	0	0	0	0	0	0	0	0	0	0	0	0	0	0	0	0	0	0	0	0	0	0	0	0	0	0	0	0	0	0	0	0	0	0	0	0	0	0	0	0	0	0	0
B5M07_02535	CP020694 (Chromosome)	518013	518459	+	hypothetical protein	0	0	0	0	0	0	0	1	0	1	1	1	0	0	0	0	0	0	0	0	0	0	1.76534	0	0.342349	0.456474	0.363986	0	0	0	-1.58052	-1.59656	-1.60824	-1.79097	-1.77843	-1.8322	-1.7466	-1.381	-1.76839	-1.69542	-1.63568	-1.68348	-1.92412	-1.90376
B5M07_02540	CP020694 (Chromosome)	518756	519013	-	hypothetical protein	0	0	0	10	4	8	12	2	9	50	14	32	40	13	28	0	0	0	10.5185	4.5441	6.53205	16.5755	3.53068	10.8745	17.1174	6.39063	11.6475	9.20158	6.41998	22.533	1.77014	1.72593	1.69349	3.18338	2.45284	2.74769	3.62468	2.30036	3.21234	3.68588	2.72622	3.29633	3.06836	2.73058
B5M07_02545	CP020694 (Chromosome)	519317	519517	-	hypothetical protein	0	0	0	1	1	0	0	2	0	6	7	3	7	0	0	0	0	0	1.05185	1.13603	0	0	3.53068	0	2.05409	3.19532	1.09196	1.61028	0	0	-0.294273	-0.328188	-0.352873	-0.138686	-0.104934	-0.758991	-0.645387	0.555652	-0.686335	0.292808	0.608109	-0.101706	0.138652	-0.845
B5M07_02550	CP020694 (Chromosome)	519602	519835	-	hypothetical protein	0	0	0	0	4	6	4	2	10	58	8	25	219	12	8	0	0	0	0	4.5441	4.89904	5.52518	3.53068	12.0828	19.8562	3.65179	9.09964	50.3786	5.92614	6.438	1.4931	1.4504	1.41892	0.903278	2.28083	2.34075	2.44438	2.10526	3.18055	3.73029	2.08407	2.92461	4.75918	2.51096
B5M07_02555	CP020694 (Chromosome)	520156	520620	+	hypothetical protein	6	4	2	0	2	3	0	1	6	0	2	4	3	1	1	22.983	13.8844	6.46183	0	2.27205	2.44952	0	1.76534	7.24969	0	0.912948	1.45594	0.690118	0.493845	0.80475	3.18833	2.61998	1.83271	-0.00467721	1.07565	1.14021	0.100562	0.909303	2.09932	-0.436788	0.452452	0.744996	0.239443	0.167946
B5M07_02560	CP020694 (Chromosome)	520740	521423	+	hypothetical protein	0	0	0	0	0	0	1	0	0	12	0	0	5	0	2	0	0	0	0	0	0	1.38129	0	0	4.10819	0	0	1.1502	0	1.6095	-0.8287	-0.856973	-0.877551	-1.19959	-1.1775	-1.26949	-0.547466	-1.051	-1.1598	0.317573	-1.33619	-1.35854	-0.550301	-1.32791
B5M07_02565	CP020694 (Chromosome)	521443	522054	+	hypothetical protein	0	0	1	0	2	0	0	0	1	0	1	2	1	0	1	0	0	3.23092	0	2.27205	0	0	0	1.20828	0	0.456474	0.727971	0.230039	0	0.80475	-0.875553	-0.90476	-0.333108	-1.25871	-0.246249	-1.33379	-1.17793	-1.1052	-0.635925	-1.44432	-1.00973	-0.824089	-1.21604	-1.40366
B5M07_02570	CP020694 (Chromosome)	522051	522710	+	hypothetical protein	8	0	2	0	4	4	1	9	2	12	10	9	26	17	11	30.644	0	6.46183	0	4.5441	3.26602	1.38129	15.8881	2.41656	4.10819	4.56474	3.27587	5.98103	8.39536	8.85225	4.00555	1.35058	2.47869	0.831632	2.21241	1.94602	1.47751	3.36964	1.7572	2.12095	2.21376	1.93028	2.46065	2.77688
B5M07_02575	CP020694 (Chromosome)	522833	523162	+	HNH endonuclease	0	0	0	3	0	5	0	1	2	1	1	2	4	0	3	0	0	0	3.15555	0	4.08253	0	1.76534	2.41656	0.342349	0.456474	0.727971	0.920158	0	2.41425	-0.168051	-0.203703	-0.229652	0.668796	-0.578844	0.900364	-0.537142	0.226131	0.458717	-0.471803	-0.366633	-0.192116	-0.0795299	-0.745644
B5M07_02580	CP020694 (Chromosome)	523331	523705	+	hypothetical protein	0	0	1	1	2	1	2	0	0	2	3	0	0	0	1	0	0	3.23092	1.05185	2.27205	0.816506	2.76259	0	0	0.684698	1.36942	0	0	0	0.80475	-0.493197	-0.526583	0.126862	-0.322959	0.127589	-0.432378	0.243878	-0.755705	-0.884187	-0.507726	-0.141124	-1.10856	-1.16795	-1.06232
B5M07_02585	CP020694 (Chromosome)	523692	525401	+	terminase	1	5	3	2	1	2	7	4	5	14	6	7	14	7	6	3.83051	17.3556	9.69275	2.1037	1.13603	1.63301	9.66906	7.06137	6.04141	4.79288	2.73884	2.5479	3.22055	3.45691	4.8285	2.04688	3.32518	2.76304	1.61119	1.31326	1.44194	2.8242	2.52146	2.39769	2.20815	1.74979	1.68957	1.86761	1.93297
B5M07_02590	CP020694 (Chromosome)	525411	526658	+	phage portal protein	1	0	1	5	3	5	0	1	2	6	1	2	7	3	5	3.83051	0	3.23092	5.25925	3.40808	4.08253	0	1.76534	2.41656	2.05409	0.456474	0.727971	1.61028	1.48153	4.02375	1.34153	0.506031	1.24946	1.72787	1.36275	1.5253	0.189482	0.920967	1.11122	1.00991	0.238357	0.397483	0.837652	0.793265
B5M07_02595	CP020694 (Chromosome)	526645	527490	+	peptidase	0	0	0	0	2	0	3	0	2	3	0	1	2	2	1	0	0	0	0	2.27205	0	4.14388	0	2.41656	1.02705	0	0.363986	0.460079	0.98769	0.80475	-0.416995	-0.449952	-0.47394	-0.83815	0.179057	-0.882069	0.608841	-0.676127	0.21482	-0.242227	-0.974802	-0.664822	-0.602602	-0.268194
B5M07_02600	CP020694 (Chromosome)	527514	528743	+	capsid protein	0	0	0	0	0	0	2	3	3	5	4	4	14	6	0	0	0	0	0	0	0	2.76259	5.29603	3.62485	1.71174	1.8259	1.45594	3.22055	2.96307	0	0.157449	0.118818	0.0906998	-0.27461	-0.254849	-0.338807	0.848587	1.33967	1.06691	0.57077	0.61021	0.464043	1.05171	0.963182
B5M07_02605	CP020694 (Chromosome)	528944	529516	+	hypothetical protein	1	0	0	0	0	0	0	5	2	0	1	3	1	1	0	3.83051	0	0	0	0	0	0	8.82671	2.41656	0	0.456474	1.09196	0.230039	0.493845	0	0.152225	-0.619856	-0.646239	-1.05912	-1.0308	-1.13296	-0.958874	1.30441	0.152092	-1.31676	-0.771022	-0.313656	-1.04337	-0.736871
B5M07_02610	CP020694 (Chromosome)	529501	529839	+	hypothetical protein	0	0	0	0	0	0	0	0	0	0	0	0	1	0	0	0	0	0	0	0	0	0	0	0	0	0	0	0.230039	0	0	-2.27419	-2.276	-2.27732	-2.29793	-2.29652	-2.30258	-2.29293	-2.28842	-2.29539	-2.31565	-2.31326	-2.31561	-2.29461	-2.31182
B5M07_02615	CP020694 (Chromosome)	529836	530240	+	hypothetical protein	0	0	0	0	0	0	0	0	0	0	0	0	0	0	0	0	0	0	0	0	0	0	0	0	0	0	0	0	0	0	0	0	0	0	0	0	0	0	0	0	0	0	0	0
B5M07_02620	CP020694 (Chromosome)	530240	530647	+	hypothetical protein	0	1	0	0	0	0	0	0	0	0	0	1	1	3	0	0	3.47111	0	0	0	0	0	0	0	0	0	0.363986	0.230039	1.48153	0	-1.37321	-0.920156	-1.41377	-1.68115	-1.66281	-1.74149	-1.61623	-1.55778	-1.64811	-1.86681	-1.84655	-1.5283	-1.64433	-0.92825
B5M07_02625	CP020694 (Chromosome)	530822	531268	+	hypothetical protein	0	0	0	0	0	2	0	0	0	0	0	4	3	1	4	0	0	0	0	0	1.63301	0	0	0	0	0	1.45594	0.690118	0.493845	3.219	-0.790595	-0.817717	-0.837458	-1.1464	-1.1252	-0.39101	-1.07139	-1.00385	-1.10823	-1.28877	-1.26456	-0.416133	-0.772225	-0.892988
B5M07_02630	CP020694 (Chromosome)	531268	531801	+	hypothetical protein	0	0	0	3	0	0	2	0	0	0	1	1	0	0	1	0	0	0	3.15555	0	0	2.76259	0	0	0	0.456474	0.363986	0	0	0.80475	-0.958293	-0.985498	-1.0053	-0.0989964	-1.29391	-1.38511	-0.238221	-1.1722	-1.27689	-1.48655	-1.08021	-1.14947	-1.51692	-1.4526
B5M07_02635	CP020694 (Chromosome)	531801	534230	+	hypothetical protein	10	15	9	9	16	7	10	13	16	44	32	30	56	20	15	38.3051	52.0667	29.0782	9.46664	18.1764	5.71554	13.8129	22.9494	19.3325	15.0634	14.6072	10.9196	12.8822	9.8769	12.0713	4.86185	5.19347	4.58448	3.52903	4.13331	3.10731	3.8722	4.35997	4.1935	3.95029	3.92076	3.64318	3.79806	3.5534
B5M07_02640	CP020694 (Chromosome)	534230	534898	+	hypothetical protein	0	0	0	0	0	1	0	4	0	0	4	6	11	4	1	0	0	0	0	0	0.816506	0	7.06137	0	0	1.8259	2.18391	2.53043	1.97538	0.80475	-0.18517	-0.221338	-0.247663	-0.622798	-0.605972	-0.143658	-0.559612	1.30452	-0.592475	-0.847685	0.321094	0.456917	0.581821	0.372836
B5M07_02645	CP020694 (Chromosome)	534898	535482	+	hypothetical protein	0	0	0	0	0	0	4	1	0	1	2	1	4	1	1	0	0	0	0	0	0	5.52518	1.76534	0	0.342349	0.912948	0.363986	0.920158	0.493845	0.80475	-0.582281	-0.613996	-0.63708	-0.998333	-0.97355	-1.04923	0.714191	-0.187828	-0.9537	-0.836417	-0.455021	-0.816638	-0.440455	-0.7118
B5M07_02650	CP020694 (Chromosome)	535464	535721	+	hypothetical protein	0	0	0	0	0	0	1	1	0	0	0	0	4	0	0	0	0	0	0	0	0	1.38129	1.76534	0	0	0	0	0.920158	0	0	-1.49562	-1.51537	-1.52975	-1.75472	-1.73929	-1.80549	-1.29916	-1.24998	-1.72692	-1.91018	-1.89671	-1.90749	-1.30023	-1.89264
B5M07_02655	CP020694 (Chromosome)	535763	536119	+	hypothetical protein	0	0	0	0	0	0	1	0	0	0	0	0	2	0	2	0	0	0	0	0	0	1.38129	0	0	0	0	0	0.460079	0	1.6095	-1.46476	-1.48262	-1.49561	-1.699	-1.68505	-1.74491	-1.28714	-1.60516	-1.67387	-1.82964	-1.81934	-1.8276	-1.52401	-1.81619
B5M07_02660	CP020694 (Chromosome)	536120	538192	+	hypothetical protein	1	2	8	1	0	12	5	1	1	12	7	12	28	7	4	3.83051	6.94222	25.8473	1.05185	0	9.79807	6.90647	1.76534	1.20828	4.10819	3.19532	4.36783	6.4411	3.45691	3.219	1.98211	2.41337	3.73609	1.19473	0.731951	2.82295	2.46822	1.50642	1.27708	2.02909	1.81923	2.0826	2.44091	1.88411
B5M07_02665	CP020694 (Chromosome)	538251	539984	+	hypothetical protein	9	11	14	14	24	16	39	22	31	50	51	58	95	48	51	34.4745	38.1822	45.2328	14.7259	27.2646	13.0641	53.8705	38.8375	37.4567	17.1174	23.2802	21.1112	21.8537	23.7046	41.0423	5.00599	5.10872	5.28211	4.197	4.77943	4.08532	5.47652	5.13355	5.09899	4.32397	4.62229	4.526	4.559	4.64021
B5M07_02670	CP020694 (Chromosome)	540113	540382	+	hypothetical protein	0	0	0	0	0	0	0	0	0	2	0	2	6	4	0	0	0	0	0	0	0	0	0	0	0.684698	0	0.727971	1.38024	1.97538	0	-1.0375	-1.05915	-1.0749	-1.32143	-1.30452	-1.37707	-1.26158	-1.20768	-1.29098	-1.0125	-1.42337	-0.992176	-0.711892	-0.541884
B5M07_02675	CP020694 (Chromosome)	540379	540813	+	hypothetical protein	1	0	0	1	0	1	0	0	1	0	0	1	3	2	1	3.83051	0	0	1.05185	0	0.816506	0	0	1.20828	0	0	0.363986	0.690118	0.98769	0.80475	-0.133501	-0.777375	-0.799377	-0.571361	-1.12008	-0.674495	-1.0601	-0.984827	-0.513177	-1.32219	-1.28891	-0.966011	-0.728477	-0.567541
B5M07_02680	CP020694 (Chromosome)	540877	541725	+	hypothetical protein	0	1	1	2	2	4	4	2	4	2	3	6	4	1	2	0	3.47111	3.23092	2.1037	2.27205	3.26602	5.52518	3.53068	4.83313	0.684698	1.36942	2.18391	0.920158	0.493845	1.6095	0.581595	1.32178	1.2827	1.05061	1.10015	1.37139	1.77741	1.39137	1.67184	0.391989	0.770049	1.08006	0.517386	0.302183
B5M07_02685	CP020694 (Chromosome)	541891	542109	+	hypothetical protein	0	0	0	0	0	0	0	0	0	0	0	0	0	0	0	0	0	0	0	0	0	0	0	0	0	0	0	0	0	0	0	0	0	0	0	0	0	0	0	0	0	0	0	0
B5M07_02690	CP020694 (Chromosome)	542205	543347	-	hypothetical protein	29	38	34	123	114	187	72	32	83	262	208	180	385	181	129	111.085	131.902	109.851	129.377	129.507	152.687	99.4532	56.491	100.287	89.6954	94.9466	65.5174	88.5652	89.3859	103.813	6.75378	6.93157	6.74263	6.91411	6.91507	7.08978	6.64119	6.08366	6.64974	6.53529	6.59351	6.22041	6.52227	6.53187
B5M07_02695	CP020694 (Chromosome)	543344	544690	-	hypothetical protein	50	94	64	247	345	367	240	193	406	562	667	570	966	634	585	191.525	326.284	206.779	259.807	391.929	299.658	331.511	340.711	490.562	192.4	304.468	207.472	222.218	313.098	470.779	7.76406	8.30398	7.83904	8.06848	8.49754	8.21577	8.32101	8.34959	8.7382	7.76454	8.23236	7.83984	7.9089	8.26147
B5M07_02700	CP020694 (Chromosome)	544687	546003	-	hypothetical protein	11	6	5	32	61	55	28	16	37	189	104	136	205	92	41	42.1356	20.8267	16.1546	33.6592	69.2976	44.9078	38.6763	28.2455	44.7064	64.7039	47.4733	49.502	47.1581	45.4337	32.9948	5.36948	4.72204	4.51092	5.14697	5.88708	5.43659	5.2853	4.98023	5.43143	5.81812	5.49427	5.53772	5.48786	5.44902
B5M07_02705	CP020694 (Chromosome)	546000	547124	-	histidine kinase	27	20	15	91	101	190	59	70	129	320	319	250	563	272	281	103.424	69.4222	48.4637	95.7183	114.739	155.136	81.4964	123.574	155.868	109.552	145.615	90.9964	129.512	134.326	226.135	6.72954	6.33841	6.00521	6.64959	6.83471	7.14968	6.48873	6.91107	7.15418	6.78707	7.0833	6.5976	6.96063	6.99859
B5M07_02710	CP020694 (Chromosome)	547155	548381	-	oxidoreductase	8	12	7	28	45	46	19	10	22	221	154	175	377	147	99	30.644	41.6533	22.6164	29.4518	51.1212	37.5593	26.2446	17.6534	26.5822	75.6591	70.297	63.6975	86.7249	72.5952	79.6703	5.11839	5.40671	4.84463	5.06431	5.61274	5.30123	4.95773	4.60994	4.96809	6.02515	5.94671	5.8431	6.1715	5.98063
B5M07_02715	CP020694 (Chromosome)	548383	549264	-	hypothetical protein	3	13	1	31	21	18	15	7	6	59	27	27	107	35	19	11.4915	45.1244	3.23092	32.6073	23.8566	14.6971	20.7194	12.3574	7.24969	20.1986	12.3248	9.82761	24.6142	17.2846	15.2903	3.72299	5.03198	2.9306	4.71815	4.3948	3.91867	4.25158	3.76404	3.30092	4.23262	3.74898	3.53628	4.43514	4.07637
B5M07_02720	CP020694 (Chromosome)	549602	550765	-	UDP-glucose 6-dehydrogenase	6	7	13	30	37	44	18	6	25	179	103	68	284	62	39	22.983	24.2978	42.0019	31.5555	42.033	35.9263	24.8633	10.5921	30.207	61.2804	47.0168	24.751	65.3312	30.6184	31.3853	4.70555	4.7531	5.27709	4.99491	5.28462	5.12532	4.76313	4.02984	4.95178	5.68301	5.40321	4.75304	5.75193	4.96435
B5M07_02725	CP020694 (Chromosome)	551462	552748	+	urea ABC transporter substrate-binding protein	1	7	1	204	126	40	8	0	0	1220	1615	2097	3888	3876	2826	3.83051	24.2978	3.23092	214.577	143.139	32.6602	11.0504	0	0	417.666	737.205	763.278	894.393	1914.14	2274.22	4.49913	5.42268	4.39723	7.49805	7.06458	5.61373	4.78553	3.83024	3.68333	8.23675	8.88502	8.92536	9.1095	10.0064
B5M07_02730	CP020694 (Chromosome)	552814	554742	+	urea ABC transporter permease subunit UrtB	0	3	5	117	66	14	0	1	1	460	846	1225	1834	1771	1227	0	10.4133	16.1546	123.066	74.9777	11.4311	0	1.76534	1.20828	157.48	386.177	445.882	421.892	874.599	987.429	3.63918	4.45836	4.74903	6.67642	6.14757	4.3868	3.12725	3.534	3.32094	6.94904	7.96142	8.12783	8.06423	8.91782
B5M07_02735	CP020694 (Chromosome)	554746	555927	+	urea ABC transporter permease subunit UrtC	3	4	6	50	20	20	6	12	9	170	336	491	1706	1138	783	11.4915	13.8844	19.3855	52.5925	22.7205	16.3301	8.28777	21.1841	10.8745	58.1993	153.375	178.717	392.447	561.995	630.119	4.48455	4.59806	4.84272	5.74519	4.93619	4.6373	4.14654	4.88632	4.3272	5.84897	6.88705	7.05716	7.95119	8.36476
B5M07_02740	CP020694 (Chromosome)	555924	556679	+	urea ABC transporter ATP-binding protein UrtD	4	0	0	5	4	7	0	8	0	35	61	107	381	331	177	15.322	0	0	5.25925	4.5441	5.71554	0	14.1227	0	11.9822	27.8449	38.9465	87.645	163.463	142.441	3.85444	2.24564	2.20745	2.90382	2.79853	2.95655	1.7518	3.78512	1.68109	3.62431	4.49515	4.8608	5.77298	6.49091
B5M07_02745	CP020694 (Chromosome)	556666	557361	+	urea ABC transporter ATP-binding subunit UrtE	2	0	0	6	3	2	1	2	8	43	25	52	227	202	97	7.66101	0	0	6.31109	3.40808	1.63301	1.38129	3.53068	9.66626	14.721	11.4118	18.9272	52.219	99.7567	78.0608	3.107	2.00531	1.96881	2.90239	2.43137	1.94121	1.98647	2.50734	3.28636	3.70734	3.44867	3.96797	5.07636	5.80927
B5M07_02750	CP020694 (Chromosome)	557520	559295	+	aspartate--tRNA ligase	10	6	9	42	39	63	29	44	65	158	97	118	225	81	54	38.3051	20.8267	29.0782	44.1777	44.305	51.4399	40.0576	77.6751	78.5383	54.0911	44.278	42.9503	51.7589	40.0014	43.4565	5.33557	4.78895	5.07676	5.47236	5.47527	5.62734	5.37471	6.05402	6.06802	5.67995	5.47454	5.44361	5.63458	5.37195
B5M07_02755	CP020694 (Chromosome)	559325	559981	-	hypothetical protein	6	16	9	20	31	32	10	20	2	91	90	99	83	36	22	22.983	55.5378	29.0782	21.037	35.2168	26.1282	13.8129	35.3068	2.41656	31.1537	41.0826	36.0346	19.0933	17.7784	17.7045	4.54098	5.4276	4.76557	4.45259	4.96842	4.66629	4.06391	4.96721	2.85426	4.8466	5.13362	4.99708	4.35446	4.28693
B5M07_02760	CP020694 (Chromosome)	560040	560672	-	S-adenosylmethionine-binding protein	54	83	82	216	204	337	89	128	126	307	206	321	188	171	92	206.847	288.102	264.935	227.199	231.749	275.163	122.935	225.964	152.244	105.101	94.0336	116.839	43.2474	84.4475	74.037	7.55744	7.91196	7.82181	7.65985	7.68093	7.86591	7.02037	7.65325	7.2391	6.86108	6.75035	6.96787	6.01394	6.64449
B5M07_02765	CP020694 (Chromosome)	560785	561261	-	hemerythrin	21	59	90	726	931	2031	188	66	116	100	196	226	188	60	54	80.4406	204.796	290.782	763.642	1057.64	1658.32	259.683	116.513	140.161	34.2349	89.4689	82.2607	43.2474	29.6307	43.4565	6.63834	7.57246	7.94648	9.02371	9.39743	9.91935	7.82689	6.99316	7.17978	5.83579	6.72809	6.64548	6.04034	5.71606
B5M07_02770	CP020694 (Chromosome)	561646	562368	+	GNAT family N-acetyltransferase	7	12	6	47	35	54	24	27	41	170	100	131	319	167	64	26.8135	41.6533	19.3855	49.4369	39.7609	44.0913	33.1511	47.6642	49.5396	58.1993	45.6474	47.6821	73.3826	82.4721	51.504	5.01333	5.41958	4.73101	5.59011	5.37079	5.47408	5.19325	5.55255	5.59207	5.75951	5.50921	5.55375	6.00341	6.12649
B5M07_02775	CP020694 (Chromosome)	562390	563109	-	response regulator	0	0	0	0	0	0	3	0	0	3	1	0	4	1	1	0	0	0	0	0	0	4.14388	0	0	1.02705	0.456474	0	0.920158	0.493845	0.80475	-0.802975	-0.830651	-0.850795	-1.16604	-1.14441	-1.22933	0.194426	-1.02058	-1.12709	-0.605044	-0.931919	-1.31252	-0.651871	-0.907142
B5M07_02780	CP020694 (Chromosome)	563236	563640	+	methylmalonyl-CoA epimerase	13	12	28	42	30	158	122	35	22	14	11	5	19	3	9	49.7966	41.6533	90.4656	44.1777	34.0808	129.008	168.518	61.787	26.5822	4.79288	5.02121	1.81993	4.37075	1.48153	7.24275	5.28735	5.10138	5.95038	5.18501	4.90989	6.37587	6.67812	5.54137	4.65341	3.07226	3.12205	2.42142	2.98476	2.36066
B5M07_02785	CP020694 (Chromosome)	563643	563936	+	hypothetical protein	1	1	6	11	11	18	43	7	8	0	1	4	13	3	2	3.83051	3.47111	19.3855	11.5703	12.4963	14.6971	59.3957	12.3574	9.66626	0	0.456474	1.45594	2.99051	1.48153	1.6095	2.2072	2.14331	3.61661	3.15478	3.23049	3.41053	4.92619	3.19737	2.96972	0.399925	0.869285	1.37941	1.89994	1.42069
B5M07_02790	CP020694 (Chromosome)	563869	564603	-	hypothetical protein	0	3	0	3	2	3	1	0	3	29	26	28	79	15	18	0	10.4133	0	3.15555	2.27205	2.44952	1.38129	0	3.62485	9.92812	11.8683	10.1916	18.1731	7.40767	14.4855	1.42849	2.90603	1.35796	1.95366	1.74085	1.76391	1.50888	1.09768	2.05975	2.95956	3.1334	2.98471	3.57999	2.67158
B5M07_02795	CP020694 (Chromosome)	564594	565166	-	nitroreductase	1	0	0	7	0	1	0	0	2	34	30	19	55	12	6	3.83051	0	0	7.36294	0	0.816506	0	0	2.41656	11.6399	13.6942	6.91572	12.6522	5.92614	4.8285	1.83578	1.02184	0.995078	2.4326	0.580591	0.917047	0.659562	0.758627	1.52332	2.91997	3.07995	2.40493	3.01081	2.2536
B5M07_02800	CP020694 (Chromosome)	565176	566282	-	class II histone deacetylase	0	2	6	5	5	14	7	5	2	95	50	53	123	49	30	0	6.94222	19.3855	5.25925	5.68013	11.4311	9.66906	8.82671	2.41656	32.5231	22.8237	19.2912	28.2949	24.1984	24.1425	2.25367	3.16258	4.02824	2.87612	2.93999	3.54002	3.39002	3.3156	2.38391	4.60586	4.23097	4.05917	4.45984	4.29119
B5M07_02805	CP020694 (Chromosome)	566446	566916	-	glyoxalase	0	1	3	0	0	0	1	0	4	3	2	2	2	12	4	0	3.47111	9.69275	0	0	0	1.38129	0	4.83313	1.02705	0.912948	0.727971	0.460079	5.92614	3.219	0.191688	0.963506	1.90722	-0.279759	-0.256368	-0.356701	0.471079	-0.124581	1.40299	0.280542	0.221008	0.0920314	-0.150176	1.66429
B5M07_02810	CP020694 (Chromosome)	567021	568037	-	tryptophan--tRNA ligase	4	5	3	26	16	27	4	2	1	52	41	39	101	14	12	15.322	17.3556	9.69275	27.3481	18.1764	22.0457	5.52518	3.53068	1.20828	17.8021	18.7154	14.1954	23.234	6.91383	9.657	3.8016	3.91996	3.41018	4.4093	3.9895	4.1894	2.93371	2.65945	2.08844	3.97782	4.02714	3.75129	4.25259	3.07965
B5M07_02815	CP020694 (Chromosome)	568113	568799	+	rhomboid family intramembrane serine protease	9	10	9	12	7	18	15	22	17	47	38	72	75	29	25	34.4745	34.7111	29.0782	12.6222	7.95218	14.6971	20.7194	38.8375	20.5408	16.0904	17.346	26.207	17.253	14.3215	20.1188	4.84916	4.85906	4.68275	3.89126	3.50106	4.02804	4.35785	4.99014	4.34954	4.11028	4.18381	4.59554	4.17757	4.00018
B5M07_02820	CP020694 (Chromosome)	568796	570337	-	murein biosynthesis integral membrane protein MurJ	14	21	7	27	12	18	19	18	8	52	37	33	48	15	13	53.6271	72.8933	22.6164	28.3999	13.6323	14.6971	26.2446	31.7762	9.66626	17.8021	16.8895	12.0115	11.0419	7.40767	10.4618	5.29139	5.63115	4.41386	4.6525	3.93572	4.00263	4.56979	4.76203	3.63346	4.18548	4.13412	3.80713	3.72587	3.38263
B5M07_02825	CP020694 (Chromosome)	570449	570961	-	CHAP domain-containing protein	0	0	0	12	1	3	2	0	12	19	11	23	51	21	20	0	0	0	12.6222	1.13603	2.44952	2.76259	0	14.4994	6.50463	5.02121	8.37167	11.732	10.3707	16.095	1.3895	1.34939	1.31983	3.15068	1.36106	1.73802	1.85112	1.06227	3.2856	2.53095	2.29359	2.77039	3.10911	2.97557
B5M07_02830	CP020694 (Chromosome)	571129	573909	-	[protein-PII] uridylyltransferase	22	12	17	156	129	198	112	51	144	866	600	609	946	563	255	84.2711	41.6533	54.9256	164.088	146.547	161.668	154.705	90.0325	173.993	296.474	273.884	221.667	217.617	278.035	205.211	6.66693	6.0386	6.27167	7.32784	7.21102	7.31247	7.26683	6.72371	7.38878	7.95725	7.8713	7.64465	7.62516	7.8875
B5M07_02835	CP020694 (Chromosome)	573911	575092	-	penicillin-binding protein activator	10	18	22	59	66	61	79	42	50	242	185	209	346	217	81	38.3051	62.48	71.0802	62.0591	74.9777	49.8069	109.122	74.1444	60.4141	82.8484	84.4477	76.073	79.5936	107.164	65.1848	5.56613	6.02424	6.15234	6.01474	6.2069	5.79549	6.59811	6.19525	5.98797	6.31055	6.33031	6.22215	6.26904	6.58088
B5M07_02840	CP020694 (Chromosome)	575180	576037	+	16S rRNA (cytidine(1402)-2'-O)-methyltransferase	0	0	0	7	4	6	3	3	4	42	26	41	69	36	19	0	0	0	7.36294	4.5441	4.89904	4.14388	5.29603	4.83313	14.3787	11.8683	14.9234	15.8727	17.7784	15.2903	1.73708	1.69326	1.66109	2.83372	2.43125	2.48255	2.37017	2.56286	2.48122	3.48996	3.29468	3.52712	3.59386	3.70289
B5M07_02845	CP020694 (Chromosome)	576060	576461	+	hypothetical protein	0	0	0	0	2	1	7	0	2	25	6	16	17	9	9	0	0	0	0	2.27205	0.816506	9.66906	0	2.41656	8.55872	2.73884	5.82377	3.91067	4.4446	7.24275	0.806377	0.763062	0.736084	0.341336	1.28936	0.730928	2.48907	0.527052	1.33065	2.43375	1.41991	2.06807	1.71886	1.81871
B5M07_02850	CP020694 (Chromosome)	576568	577503	+	glutathione synthase	4	6	13	30	32	73	17	12	12	163	134	111	220	139	69	15.322	20.8267	42.0019	31.5555	36.3528	59.6049	23.482	21.1841	14.4994	55.8029	61.1675	40.4024	50.6087	68.6444	55.5278	4.42807	4.67253	5.32539	5.04237	5.18327	5.69368	4.75933	4.66809	4.32235	5.62642	5.72281	5.29093	5.5244	5.84531
B5M07_02855	CP020694 (Chromosome)	577500	578417	+	esterase	1	2	3	4	5	8	3	2	9	54	18	62	57	29	15	3.83051	6.94222	9.69275	4.2074	5.68013	6.53205	4.14388	3.53068	10.8745	18.4868	8.21653	22.5671	13.1122	14.3215	12.0713	2.58831	2.94615	3.20676	2.52098	2.75489	2.86406	2.52773	2.44489	3.32283	3.86054	3.06546	4.06532	3.51648	3.59969
B5M07_02860	CP020694 (Chromosome)	578380	579897	-	AAA family ATPase	1	1	1	10	2	1	0	1	2	40	29	26	21	7	10	3.83051	3.47111	3.23092	10.5185	2.27205	0.816506	0	1.76534	2.41656	13.694	13.2377	9.46362	4.83083	3.45691	8.0475	2.04656	1.98617	1.94215	2.92049	1.66209	1.11659	0.895196	1.57178	1.70486	3.21464	3.17527	2.84391	2.21617	1.93234
B5M07_02865	CP020694 (Chromosome)	579967	580659	-	glutathione S-transferase	2	8	4	10	6	14	5	7	11	97	66	77	218	135	100	7.66101	27.7689	12.9237	10.5185	6.81616	11.4311	6.90647	12.3574	13.2911	33.2078	30.1273	28.0269	50.1486	66.6691	80.475	3.58276	4.64647	3.95126	3.73527	3.38176	3.80315	3.40564	3.89103	3.94684	4.85045	4.74815	4.67406	5.28993	5.59708
B5M07_02870	CP020694 (Chromosome)	580717	581298	-	histidine phosphatase family protein	0	0	6	0	6	0	6	0	2	12	3	6	32	14	9	0	0	19.3855	0	6.81616	0	8.28777	0	2.41656	4.10819	1.36942	2.18391	7.36126	6.91383	7.24275	0.943789	0.908787	3.24746	0.446984	2.29099	0.34759	2.46506	0.652426	1.4439	1.86382	1.02919	1.34283	2.41317	2.33794
B5M07_02875	CP020694 (Chromosome)	581295	581816	-	bifunctional adenosylcobinamide kinase/adenosylcobinamide-phosphate guanylyltransferase	0	5	0	7	12	6	1	1	5	24	10	20	52	12	10	0	17.3556	0	7.36294	13.6323	4.89904	1.38129	1.76534	6.04141	8.21637	4.56474	7.27971	11.9621	5.92614	8.0475	1.56101	3.48263	1.48885	2.72566	3.31253	2.37288	1.61526	1.76539	2.55021	2.84078	2.30847	2.72615	3.21091	2.5365
B5M07_02880	CP020694 (Chromosome)	581915	582793	+	RNA polymerase factor sigma-32	348	906	1322	7820	10292	16531	2424	1070	1830	256	878	1457	236	184	339	1333.02	3144.83	4271.27	8225.46	11692	13497.7	3348.26	1888.92	2211.16	87.6413	400.784	530.327	54.2893	90.8675	272.81	10.3783	11.2984	11.6385	12.384	12.7923	12.9606	11.368	10.7457	10.9148	7.96145	9.19464	9.45709	7.65739	7.98765
B5M07_02885	CP020694 (Chromosome)	582875	584068	+	bifunctional phosphopantothenoylcysteine decarboxylase/phosphopantothenate synthase	6	15	39	332	442	454	61	31	38	71	58	65	88	33	19	22.983	52.0667	126.006	349.214	502.124	370.694	84.259	54.7256	45.9147	24.3068	26.4755	23.6591	20.2435	16.2969	15.2903	5.02123	5.76012	6.67819	7.8273	8.24314	7.89653	6.25382	5.80794	5.63127	5.0105	5.09253	4.98572	4.83905	4.65356
B5M07_02890	CP020694 (Chromosome)	584078	584530	+	deoxyuridine 5'-triphosphate nucleotidohydrolase	0	1	1	1	3	1	1	1	0	12	4	8	14	1	2	0	3.47111	3.23092	1.05185	3.40808	0.816506	1.38129	1.76534	0	4.10819	1.8259	2.91188	3.22055	0.493845	1.6095	0.443155	1.17776	1.13992	0.553796	1.26694	0.428916	0.692615	0.820397	0.0542425	1.46731	0.842783	1.1859	1.27377	0.197857
B5M07_02895	CP020694 (Chromosome)	584530	585567	+	molybdopterin biosynthesis protein	2	2	3	15	13	11	14	11	11	59	25	36	83	23	10	7.66101	6.94222	9.69275	15.7777	14.7683	8.98157	19.3381	19.4188	13.2911	20.1986	11.4118	13.1035	19.0933	11.3584	8.0475	3.28086	3.20592	3.44645	3.87684	3.81252	3.35129	4.0738	4.07376	3.71218	4.1295	3.56747	3.69963	4.07374	3.56322
B5M07_02900	CP020694 (Chromosome)	585616	587628	+	peptidase M3	8	10	9	16	21	46	8	16	11	74	76	139	95	39	33	30.644	34.7111	29.0782	16.8296	23.8566	37.5593	11.0504	28.2455	13.2911	25.3338	34.692	50.594	21.8537	19.2599	26.5568	4.84357	4.96763	4.7943	4.27001	4.60333	5.0618	3.90582	4.76906	4.05911	4.66235	4.98174	5.37753	4.51501	4.39276
B5M07_02905	CP020694 (Chromosome)	587648	588586	-	glyoxylate/hydroxypyruvate reductase A	16	16	4	21	21	33	6	32	29	149	88	134	150	81	44	61.2881	55.5378	12.9237	22.0888	23.8566	26.9447	8.28777	56.491	35.0402	51.01	40.1697	48.7741	34.5059	40.0014	35.409	5.67304	5.57208	4.23649	4.65887	4.73275	4.84876	3.83694	5.59871	5.10981	5.49872	5.24995	5.45163	5.0949	5.24554
B5M07_02910	CP020694 (Chromosome)	588590	589729	-	rod shape-determining protein RodA	13	13	5	32	34	51	17	14	28	152	120	136	155	105	67	49.7966	45.1244	16.1546	33.6592	38.6249	41.6418	23.482	24.7148	33.8319	52.037	54.7769	49.502	35.6561	51.8537	53.9183	5.52276	5.42484	4.49509	5.1345	5.27168	5.3478	4.79041	4.84154	5.13988	5.57824	5.63138	5.52626	5.19069	5.57407
B5M07_02915	CP020694 (Chromosome)	589726	591675	-	penicillin-binding protein 2	38	18	26	72	46	72	28	29	30	231	149	178	253	128	88	145.559	62.48	84.0038	75.7331	52.2572	58.7884	38.6763	51.1949	36.2485	79.0826	68.0146	64.7894	58.2	63.2121	70.818	6.85723	5.97604	6.27671	6.17291	5.79578	5.91364	5.50299	5.77678	5.4401	6.21889	6.06248	6.01258	5.90293	5.98733
B5M07_02920	CP020694 (Chromosome)	591691	592230	-	rod shape-determining protein MreD	0	0	0	2	10	9	3	1	2	62	24	27	46	40	14	0	0	0	2.1037	11.3603	7.34855	4.14388	1.76534	2.41656	21.2256	10.9554	9.82761	10.5818	19.7538	11.2665	1.60809	1.5654	1.534	1.81451	3.16701	2.76039	2.28387	1.8012	1.91167	3.83187	3.1501	3.04559	3.12201	3.75117
B5M07_02925	CP020694 (Chromosome)	592227	593129	-	rod shape-determining protein MreC	0	5	0	9	10	12	2	4	5	34	33	39	53	21	17	0	17.3556	0	9.46664	11.3603	9.79807	2.76259	7.06137	6.04141	11.6399	15.0636	14.1954	12.1921	10.3707	13.6808	1.9385	3.71737	1.85945	3.17892	3.34878	3.21242	2.24671	2.92387	2.78833	3.38269	3.63655	3.57881	3.42992	3.26902
B5M07_02930	CP020694 (Chromosome)	593201	594247	-	rod shape-determining protein	19	22	28	101	107	143	69	34	60	363	213	247	537	277	155	72.7796	76.3645	90.4656	106.237	121.555	116.76	95.3094	60.0216	72.4969	124.273	97.2289	89.9044	123.531	136.795	124.736	6.32091	6.36707	6.53495	6.69875	6.83872	6.79698	6.58717	6.12909	6.31143	6.86274	6.6075	6.52716	6.85657	6.96384
B5M07_02935	CP020694 (Chromosome)	594427	595008	+	glyoxalase	10	11	2	13	4	9	19	3	30	18	15	18	43	26	21	38.3051	38.1822	6.46183	13.674	4.5441	7.34855	26.2446	5.29603	36.2485	6.16228	6.84711	6.55174	9.8917	12.84	16.8998	4.73277	4.73522	3.12554	3.72376	2.79179	3.15441	4.37416	2.93554	4.71748	2.98497	3.0813	3.03915	3.41257	3.66438
B5M07_02940	CP020694 (Chromosome)	595285	596853	-	2-isopropylmalate synthase	50	71	67	46	66	89	41	92	54	733	415	478	884	402	254	191.525	246.449	216.471	48.3851	74.9777	72.669	56.6331	162.411	65.2472	250.942	189.437	173.985	203.355	198.526	204.407	7.45094	7.71955	7.58116	6.09028	6.50138	6.46977	6.23727	7.27987	6.36871	7.74342	7.44263	7.3529	7.51813	7.49229
B5M07_02945	CP020694 (Chromosome)	597153	597821	+	C factor, cell signaling protein	6	4	4	13	27	44	29	21	33	9	18	25	14	12	12	22.983	13.8844	12.9237	13.674	30.6727	35.9263	40.0576	37.0722	39.8733	3.08114	8.21653	9.09964	3.22055	5.92614	9.657	4.28966	3.82309	3.76027	3.80475	4.61618	4.78842	4.89691	4.80822	4.8945	2.51672	3.32572	3.41616	2.53063	3.04329
B5M07_02950	CP020694 (Chromosome)	597815	599344	+	cryptochrome/photolyase family protein	6	2	11	27	57	106	31	22	61	27	55	93	82	69	54	22.983	6.94222	35.5401	28.3999	64.7535	86.5496	42.8201	38.8375	73.7052	9.24342	25.1061	33.8507	18.8632	34.0753	43.4565	4.69879	3.81087	5.1061	4.88524	5.73386	6.04959	5.29842	5.19756	5.8725	3.83952	4.76173	5.0606	4.48217	5.06721
B5M07_02955	CP020694 (Chromosome)	599358	599723	-	antibiotic biosynthesis monooxygenase	0	5	0	0	4	7	4	0	1	29	15	11	26	11	7	0	17.3556	0	0	4.5441	5.71554	5.52518	0	1.20828	9.92812	6.84711	4.00384	5.98103	5.43229	5.63325	1.18187	3.24704	1.11718	0.665094	2.07216	2.27608	2.23147	0.876059	1.241	2.81795	2.45393	1.97334	2.33561	2.23945
B5M07_02960	CP020694 (Chromosome)	599850	600530	-	hypothetical protein	5	10	29	254	753	1101	23	12	37	54	162	268	26	8	6	19.1525	34.7111	93.6966	267.17	855.428	898.973	31.7698	21.1841	44.7064	18.4868	73.9488	97.5481	5.98103	3.95076	4.8285	4.78967	5.30204	6.30568	7.48002	8.83984	8.89958	5.2047	4.8347	5.54055	4.6804	6.06294	6.3603	3.7293	3.4883
B5M07_02965	CP020694 (Chromosome)	600797	602251	-	hypothetical protein	6	4	2	3	8	13	8	8	7	11	18	7	32	7	3	22.983	13.8844	6.46183	3.15555	9.08821	10.6146	11.0504	14.1227	8.45797	3.76584	8.21653	2.5479	7.36126	3.45691	2.41425	3.90523	3.40803	2.75916	2.19314	3.05253	3.2041	3.23243	3.46229	2.98585	2.27622	2.96539	1.97641	2.86346	2.2185
B5M07_02970	CP020694 (Chromosome)	602456	604054	+	2-isopropylmalate synthase	34	29	28	116	105	79	95	66	137	575	459	603	743	619	599	130.237	100.662	90.4656	122.014	119.283	64.504	131.223	116.513	165.535	196.851	209.521	219.483	170.919	305.69	482.045	7.10168	6.84695	6.74334	7.0336	7.01088	6.41358	7.1075	6.98811	7.34577	7.52733	7.59311	7.64242	7.37932	7.99776
B5M07_02975	CP020694 (Chromosome)	604120	605457	+	glutamate--tRNA ligase	13	6	7	35	31	43	16	24	45	220	167	211	388	111	141	49.7966	20.8267	22.6164	36.8147	35.2168	35.1098	22.1007	42.3682	54.3727	75.3168	76.2311	76.8009	89.2553	54.8168	113.47	5.62388	4.82882	4.89373	5.32299	5.27995	5.27549	4.84623	5.46324	5.71432	6.05599	6.06836	6.07658	6.23716	5.72358
B5M07_02980	CP020694 (Chromosome)	605531	606121	-	gamma-glutamylcyclotransferase	0	0	0	0	4	0	0	0	2	55	13	17	78	32	13	0	0	0	0	4.5441	0	0	0	2.41656	18.8292	5.93416	6.18775	17.9431	15.803	10.4618	1.03805	1.00098	0.973524	0.51045	1.99585	0.403445	0.626092	0.729401	1.51145	3.4428	2.26113	2.30515	3.39705	3.24811
B5M07_02985	CP020694 (Chromosome)	606456	607589	+	glycine cleavage system protein T	56	62	43	93	80	63	61	123	102	252	233	374	737	343	178	214.508	215.209	138.929	97.822	90.8821	51.4399	84.259	217.137	123.245	86.2719	106.358	136.131	169.539	169.389	143.246	7.53704	7.54104	7.08185	6.72431	6.65087	6.10248	6.57649	7.55307	6.95899	6.59728	6.80813	7.06171	7.29172	7.29053
B5M07_02990	CP020694 (Chromosome)	607611	607970	+	glycine cleavage system protein H	7	13	6	17	1	12	9	16	12	66	29	68	170	82	62	26.8135	45.1244	19.3855	17.8814	1.13603	9.79807	12.4317	28.2455	14.4994	22.595	13.2377	24.751	39.1067	40.4953	49.8945	4.6083	5.14071	4.30315	4.22239	2.43589	3.66686	3.88942	4.67132	4.02606	4.45273	3.93142	4.54493	5.0211	5.0555
B5M07_02995	CP020694 (Chromosome)	608083	610929	+	glycine dehydrogenase (aminomethyl-transferring)	93	50	86	100	122	100	173	223	303	1025	1113	1603	1089	1171	1290	356.237	173.556	277.859	105.185	138.595	81.6506	238.964	393.671	366.109	350.908	508.055	583.469	250.513	578.292	1038.13	8.40799	7.67996	8.15061	7.19715	7.45747	6.96569	7.99617	8.51384	8.43746	8.39312	8.7869	8.93676	8.04373	8.92699
B5M07_03000	CP020694 (Chromosome)	610962	613493	-	drug:proton antiporter	3	1	8	25	53	131	15	6	8	48	120	222	76	45	35	11.4915	3.47111	25.8473	26.2962	60.2094	106.962	20.7194	10.5921	9.66626	16.4327	54.7769	80.8048	17.483	22.223	28.1663	3.98834	3.29794	4.676	4.69456	5.55781	6.19368	4.46164	3.87057	3.77628	4.23099	5.46175	5.88588	4.28956	4.52672
B5M07_03005	CP020694 (Chromosome)	613490	614158	-	ABC transporter	5	1	5	9	13	29	2	2	5	9	8	43	12	5	5	19.1525	3.47111	16.1546	9.46664	14.7683	23.6787	2.76259	3.53068	6.04141	3.08114	3.65179	15.6514	2.76047	2.46922	4.02375	3.68716	2.32498	3.53028	3.0613	3.49551	3.99595	2.08874	2.26688	2.65652	2.07743	2.22102	3.57646	1.97975	1.92841
B5M07_03010	CP020694 (Chromosome)	614208	614864	+	arylesterase	1	1	0	11	10	34	5	0	2	5	5	10	18	4	2	3.83051	3.47111	0	11.5703	11.3603	27.7612	6.90647	0	2.41656	1.71174	2.28237	3.63986	4.14071	1.97538	1.6095	1.9396	1.87934	1.11357	2.95528	2.93265	3.89027	2.43916	0.867468	1.60875	1.30882	1.52557	1.89513	2.00777	1.42517
B5M07_03015	CP020694 (Chromosome)	614915	615121	-	cold-shock protein	0	0	0	1	5	3	2	0	0	15	11	4	22	3	13	0	0	0	1.05185	5.68013	2.44952	2.76259	0	0	5.13523	5.02121	1.45594	5.06087	1.48153	10.4618	0.665027	0.622562	0.591654	0.747516	1.89224	1.22623	1.30263	0.38429	0.256297	1.85126	1.82386	0.864803	1.84532	0.884365
B5M07_03020	CP020694 (Chromosome)	615453	616784	+	dihydropyrimidine dehydrogenase	42	50	30	61	33	46	28	33	35	83	282	881	765	1314	1285	160.881	173.556	96.9275	64.1628	37.4889	37.5593	38.6763	58.2563	42.2899	28.415	128.726	320.671	175.98	648.912	1034.1	7.18762	7.26834	6.6663	6.25382	5.75061	5.74791	5.78191	6.16457	5.86091	5.49019	6.95691	7.94176	7.28789	8.73719
B5M07_03025	CP020694 (Chromosome)	616810	618123	+	dihydropyrimidine dehydrogenase subunit B	27	28	22	66	34	39	39	12	32	62	147	412	312	541	482	103.424	97.1911	71.0802	69.422	38.6249	31.8437	53.8705	21.1841	38.665	21.2256	67.1016	149.962	71.7723	267.17	387.89	6.53951	6.47532	6.1552	6.13094	5.55235	5.3678	5.8764	5.0264	5.55391	4.99345	6.09598	6.9454	6.16497	7.58353
B5M07_03030	CP020694 (Chromosome)	618145	618360	-	hypothetical protein	0	0	0	0	0	0	0	0	0	1	2	0	3	0	0	0	0	0	0	0	0	0	0	0	0.342349	0.912948	0	0.690118	0	0	-1.57129	-1.58327	-1.59199	-1.72848	-1.71912	-1.75929	-1.69534	-1.6655	-1.71162	-1.65801	-1.45759	-1.80949	-1.52462	-1.80496
B5M07_03035	CP020694 (Chromosome)	618459	619097	-	TetR family transcriptional regulator	0	0	3	4	2	2	1	1	0	7	13	5	11	5	10	0	0	9.69275	4.2074	2.27205	1.63301	1.38129	1.76534	0	2.39644	5.93416	1.81993	2.53043	2.46922	8.0475	0.759851	0.716939	2.34237	1.70946	1.25035	1.03617	0.979133	1.11621	0.349855	1.28264	2.04189	1.08352	1.32451	1.30545
B5M07_03040	CP020694 (Chromosome)	619251	620501	+	Zn-dependent hydrolase	47	39	23	95	41	47	45	20	48	254	461	1266	2064	2683	2137	180.034	135.373	74.3111	99.9257	46.5771	38.3758	62.1583	35.3068	57.9975	86.9566	210.434	460.806	474.801	1324.99	1719.75	7.43753	7.14553	6.56114	6.83865	6.11816	5.94279	6.38366	5.88788	6.31811	6.69947	7.60339	8.45579	8.48931	9.66059
B5M07_03045	CP020694 (Chromosome)	620575	622035	+	dihydropyrimidinase	47	43	24	98	63	72	40	42	74	252	252	601	909	1071	773	180.034	149.258	77.542	103.081	71.5697	58.7884	55.2518	74.1444	89.4129	86.2719	115.031	218.755	209.106	528.908	622.072	7.36755	7.17242	6.51931	6.79408	6.43411	6.24452	6.19061	6.47085	6.6522	6.61453	6.90476	7.57872	7.53054	8.55165
B5M07_03050	CP020694 (Chromosome)	622110	622895	+	sulfonate ABC transporter ATP-binding protein	19	9	20	45	38	24	33	46	73	82	49	88	240	125	52	72.7796	31.24	64.6183	47.3332	43.169	19.5961	45.5827	81.2057	88.2046	28.0726	22.3672	32.0307	55.2095	61.7306	41.847	5.97896	5.14483	5.85753	5.54331	5.45026	4.69275	5.50505	6.10257	6.19316	5.02258	4.8077	5.15151	5.7026	5.81827
B5M07_03055	CP020694 (Chromosome)	622892	623755	+	ABC transporter permease	2	3	3	25	28	18	25	8	47	59	16	27	128	79	34	7.66101	10.4133	9.69275	26.2962	31.8087	14.6971	34.5324	14.1227	56.7892	20.1986	7.30358	9.82761	29.445	39.0137	27.3615	3.55509	3.75966	3.70086	4.58316	4.77746	4.0134	4.86053	3.98593	5.39267	4.32061	3.37767	3.63347	4.70493	4.99735
B5M07_03060	CP020694 (Chromosome)	623755	624594	+	ABC transporter permease	9	3	4	36	19	20	36	13	40	58	18	29	126	77	39	34.4745	10.4133	12.9237	37.8666	21.5845	16.3301	49.7266	22.9494	48.3313	19.8562	8.21653	10.5556	28.985	38.0261	31.3853	4.91783	3.8639	4.02428	5.03217	4.4647	4.19572	5.31649	4.52475	5.28773	4.38086	3.57002	3.7849	4.76112	5.04066
B5M07_03065	CP020694 (Chromosome)	624622	625602	+	nitrate ABC transporter substrate-binding protein	153	156	155	527	401	669	388	274	390	219	188	243	739	742	333	586.067	541.493	500.792	554.324	455.547	546.242	535.942	483.704	471.23	74.9744	85.8171	88.4485	169.999	366.433	267.982	8.96098	8.87585	8.79211	8.90253	8.69206	8.88683	8.86598	8.75574	8.72812	6.92014	7.04036	7.06679	7.68173	8.4622
B5M07_03070	CP020694 (Chromosome)	625892	626443	-	hypothetical protein	8	12	30	59	54	53	25	11	17	43	45	53	92	56	45	30.644	41.6533	96.9275	62.0591	61.3454	43.2748	34.5324	19.4188	20.5408	14.721	20.5413	19.2912	21.1636	27.6553	36.2138	4.96184	5.26202	6.15381	5.68747	5.67466	5.31032	5.07881	4.52888	4.5743	4.25286	4.56627	4.50522	4.59263	4.85665
B5M07_03075	CP020694 (Chromosome)	626586	626792	-	cold-shock protein	15	0	6	135	52	108	56	9	48	183	66	111	281	68	38	57.4576	0	19.3855	142	59.0734	88.1826	77.3525	15.8881	57.9975	62.6498	30.1273	40.4024	64.6411	33.5814	30.5805	5.70382	3.27679	4.68366	6.68931	5.74104	6.16829	6.02482	4.48768	5.72162	5.80557	5.05756	5.35097	5.83906	5.16518
B5M07_03080	CP020694 (Chromosome)	627172	628146	+	response regulator	474	333	333	932	644	809	662	705	793	226	444	607	964	736	644	1815.66	1155.88	1075.9	980.323	731.601	660.553	914.417	1244.57	958.168	77.3708	202.674	220.939	221.758	363.47	518.259	10.4109	9.91252	9.83466	9.73478	9.42214	9.31457	9.65977	9.99389	9.71008	7.30169	8.13713	8.21807	8.22128	8.70243
B5M07_03085	CP020694 (Chromosome)	628317	629972	-	energy-dependent translational throttle protein EttA	6	11	12	43	44	99	33	8	32	217	149	113	273	106	57	22.983	38.1822	38.771	45.2295	49.9852	80.8341	45.5827	14.1227	38.665	74.2897	68.0146	41.1304	62.8008	52.3476	45.8708	4.876	5.3322	5.34638	5.49655	5.59805	6.10116	5.50436	4.43469	5.33972	6.01328	5.91948	5.40021	5.83637	5.64633
B5M07_03090	CP020694 (Chromosome)	630329	630766	+	universal stress protein	3	4	5	21	15	20	30	10	32	35	27	39	93	49	10	11.4915	13.8844	16.1546	22.0888	17.0404	16.3301	41.4388	17.6534	38.665	11.9822	12.3248	14.1954	21.3937	24.1984	8.0475	3.7813	3.93126	4.0614	4.36142	4.10725	4.06582	5.0063	4.14122	4.93515	3.76778	3.79589	3.929	4.33352	4.4568
B5M07_03095	CP020694 (Chromosome)	630778	632325	+	sodium:alanine symporter	32	57	38	197	171	227	190	85	226	179	130	267	292	268	118	122.576	197.853	122.775	207.214	194.26	185.347	262.446	150.054	273.072	61.2804	59.3416	97.1841	67.1715	132.35	94.9605	6.97647	7.47201	6.97787	7.52401	7.45524	7.40581	7.77734	7.18364	7.82059	6.2889	6.25932	6.73952	6.37581	7.05399
B5M07_03100	CP020694 (Chromosome)	632408	633001	+	nicotinic acid mononucleotide adenylyltransferase	0	0	0	1	0	6	7	0	3	15	6	7	16	7	8	0	0	0	1.05185	0	4.89904	9.66906	0	3.62485	5.13523	2.73884	2.5479	3.68063	3.45691	6.438	0.761846	0.719041	0.687885	0.832264	0.333343	1.84825	2.44417	0.485765	1.58335	1.91525	1.38451	1.32974	1.63022	1.56848
B5M07_03105	CP020694 (Chromosome)	632993	633826	-	hypothetical protein	0	0	0	12	3	8	1	8	6	22	10	5	36	18	1	0	0	0	12.6222	3.40808	6.53205	1.38129	14.1227	7.24969	7.53168	4.56474	1.81993	8.28142	8.88921	0.80475	1.26991	1.23168	1.20347	3.07456	1.905	2.44891	1.38822	3.15818	2.53228	2.59742	2.1373	1.41718	2.69287	2.75104
B5M07_03110	CP020694 (Chromosome)	633978	635522	+	D-alanyl-D-alanine carboxypeptidase/D-alanyl-D-alanine-endopeptidase	12	6	7	53	97	154	42	26	36	203	192	281	317	168	137	45.9661	20.8267	22.6164	55.748	110.195	125.742	58.0144	45.8989	43.4981	69.4968	87.643	102.28	72.9225	82.9659	110.251	5.67556	4.98239	5.04369	5.85761	6.56513	6.70787	5.89806	5.66683	5.61222	6.08233	6.32412	6.48784	6.13228	6.26647
B5M07_03115	CP020694 (Chromosome)	635530	635952	-	2-dehydro-3-deoxyphosphooctonate aldolase	0	7	7	9	5	55	30	9	3	9	3	16	21	10	7	0	24.2978	22.6164	9.46664	5.68013	44.9078	41.4388	15.8881	3.62485	3.08114	1.36942	5.82377	4.83083	4.93845	5.63325	1.91011	4.07133	4.00134	3.17711	2.72439	4.80705	4.70431	3.67104	2.38364	2.18558	1.66277	2.72545	2.55331	2.58476
B5M07_03120	CP020694 (Chromosome)	636075	637655	+	lysine--tRNA ligase	5	4	3	21	11	23	18	16	20	94	95	65	145	36	48	19.1525	13.8844	9.69275	22.0888	12.4963	18.7796	24.8633	28.2455	24.1656	32.1808	43.365	23.6591	33.3557	17.7784	38.628	4.35325	4.07753	3.79788	4.47974	3.94935	4.32171	4.59573	4.72113	4.56792	4.86068	5.1711	4.54776	4.89845	4.26699
B5M07_03125	CP020694 (Chromosome)	637717	638130	+	DUF4864 domain-containing protein	0	1	0	10	16	39	2	11	5	10	13	20	26	8	3	0	3.47111	0	10.5185	18.1764	31.8437	2.76259	19.4188	6.04141	3.42349	5.93416	7.27971	5.98103	3.95076	2.41425	1.62056	2.24129	1.54558	3.10587	3.65624	4.26743	2.01534	3.70523	2.59392	2.10029	2.57775	2.76739	2.58474	2.22559
B5M07_03130	CP020694 (Chromosome)	638278	640566	+	hypothetical protein	11	4	2	8	29	9	14	9	19	11	13	9	16	4	5	42.1356	13.8844	6.46183	8.41479	32.9448	7.34855	19.3381	15.8881	22.9574	3.76584	5.93416	3.27587	3.68063	1.97538	4.02375	4.7016	3.55704	2.92273	3.11517	4.49032	2.99125	3.92019	3.71351	4.10256	2.40158	2.7937	2.29306	2.37238	1.95797
B5M07_03135	CP020694 (Chromosome)	640626	641297	-	hypothetical protein	2	3	9	47	44	55	2	1	0	0	2	0	5	1	0	7.66101	10.4133	29.0782	49.4369	49.9852	44.9078	2.76259	1.76534	0	0	0.912948	0	1.1502	0.493845	0	2.5095	2.81639	3.96719	4.67516	4.68529	4.57104	1.71658	1.46547	0.649536	0.0311619	0.895436	0.0599259	0.960311	0.63449
B5M07_03140	CP020694 (Chromosome)	641416	641601	-	hypothetical protein	7	14	19	64	57	77	9	21	25	17	9	13	12	9	3	26.8135	48.5956	61.3874	67.3183	64.7535	62.871	12.4317	37.0722	30.207	5.81993	4.10826	4.73181	2.76047	4.4446	2.41425	4.53353	5.15929	5.41883	5.54858	5.50433	5.47564	3.80452	4.88928	4.67962	3.10263	2.83428	2.9339	2.50333	2.89889
B5M07_03145	CP020694 (Chromosome)	641827	642138	+	photosystem reaction center subunit H	42	55	23	37	52	62	45	48	62	4	7	24	2	1	7	160.881	190.911	74.3111	38.9184	59.0734	50.6234	62.1583	84.7364	74.9135	1.3694	3.19532	8.73565	0.460079	0.493845	5.63325	6.62602	6.82821	5.75306	5.07291	5.52069	5.356	5.57402	5.91327	5.78144	2.29435	2.8207	3.60478	1.8138	2.02071
B5M07_03150	CP020694 (Chromosome)	642377	642646	+	hypothetical protein	2	0	2	5	1	5	1	0	7	14	20	9	19	3	1	7.66101	0	6.46183	5.25925	1.13603	4.08253	1.38129	0	8.45797	4.79288	9.12948	3.27587	4.37075	1.48153	0.80475	2.30335	0.973275	2.18	2.08116	1.07517	1.87341	1.18706	0.722144	2.50855	2.02416	2.62125	1.69836	1.94606	1.1339
B5M07_03155	CP020694 (Chromosome)	642708	644912	-	excinuclease ABC subunit B	6	12	10	71	124	392	59	40	49	377	518	819	421	246	235	22.983	41.6533	32.3092	74.6813	140.867	320.07	81.4964	70.6137	59.2058	129.066	236.453	298.104	96.8466	121.486	189.116	5.33747	5.81568	5.59478	6.35425	7.00686	7.89945	6.44226	6.30048	6.12629	6.91559	7.56583	7.82145	6.61679	6.85193
B5M07_03160	CP020694 (Chromosome)	645000	645284	-	antifreeze protein	0	0	0	5	2	6	0	0	0	5	23	17	29	5	1	0	0	0	5.25925	2.27205	4.89904	0	0	0	1.71174	10.4989	6.18775	6.67114	2.46922	0.80475	0.622427	0.579933	0.549005	1.80366	1.14016	1.75543	0.254494	0.337189	0.209094	0.939739	2.5057	1.99918	2.07978	1.20657
B5M07_03165	CP020694 (Chromosome)	645426	645737	+	ETC complex I subunit	1	2	0	3	4	9	0	3	8	22	13	14	44	12	16	3.83051	6.94222	0	3.15555	4.5441	7.34855	0	5.29603	9.66626	7.53168	5.93416	5.0958	10.1217	5.92614	12.876	2.19997	2.60054	1.43419	2.00395	2.27756	2.69025	1.07098	2.401	2.93577	2.72275	2.50228	2.36768	3.0093	2.50076
B5M07_03170	CP020694 (Chromosome)	645957	647375	-	amidase	10	15	13	11	6	16	18	14	6	44	31	28	120	165	134	38.3051	52.0667	42.0019	11.5703	6.81616	13.0641	24.8633	24.7148	7.24969	15.0634	14.1507	10.1916	27.6047	81.4844	107.837	5.03247	5.35583	5.13177	3.88944	3.45992	3.99257	4.60959	4.60324	3.51111	4.11728	4.05979	3.75502	4.71765	5.87099
B5M07_03175	CP020694 (Chromosome)	647586	648392	-	IclR family transcriptional regulator	12	19	17	4	1	0	2	8	1	14	9	4	30	17	6	45.9661	65.9511	54.9256	4.2074	1.13603	0	2.76259	14.1227	1.20828	4.79288	4.10826	1.45594	6.90118	8.39536	4.8285	4.68903	5.12169	4.91238	2.34338	1.56666	0.924526	2.06063	3.45172	1.60681	2.4293	2.29713	1.49842	2.77109	2.96019
B5M07_03180	CP020694 (Chromosome)	648541	650097	+	microcystin degradation protein MlrC	50	38	29	79	41	8	12	49	38	143	179	276	862	900	722	191.525	131.902	93.6966	83.0961	46.5771	6.53205	16.5755	86.5018	45.9147	48.9559	81.7088	100.46	198.294	444.46	581.03	7.28702	6.8885	6.53405	6.41134	5.83916	4.26951	4.94363	6.4526	5.82604	5.88177	6.39377	6.60709	7.33355	8.23398
B5M07_03185	CP020694 (Chromosome)	650132	651742	+	ABC transporter substrate-binding protein	133	91	155	716	504	613	173	113	133	126	178	221	1107	1712	1036	509.457	315.871	500.792	753.124	572.557	500.518	238.964	199.484	160.701	43.136	81.2523	80.4408	254.654	845.462	833.721	8.78171	8.27605	8.76362	9.2103	8.90988	8.76457	7.98906	7.80739	7.59301	6.40839	6.94867	6.93894	8.05353	9.3389
B5M07_03190	CP020694 (Chromosome)	651858	652799	+	peptide ABC transporter	21	31	46	69	42	17	24	26	40	36	49	53	183	263	172	80.4406	107.604	148.622	72.5776	47.7131	13.8806	33.1511	45.8989	48.3313	12.3246	22.3672	19.2912	42.0972	129.881	138.417	6.12639	6.4376	6.79161	6.02728	5.59429	4.43944	5.23565	5.55581	5.60733	4.31933	4.85321	4.71469	5.46672	6.65571
B5M07_03195	CP020694 (Chromosome)	652801	653688	+	peptide ABC transporter permease	31	9	11	60	51	35	28	32	25	37	48	51	208	253	265	118.746	31.24	35.5401	63.1109	57.9373	28.5777	38.6763	56.491	30.207	12.6669	21.9107	18.5633	47.8482	124.943	213.259	6.51323	5.15456	5.27385	5.84944	5.76018	5.05227	5.35031	5.73273	5.10857	4.29911	4.79564	4.63994	5.56409	6.58534
B5M07_03200	CP020694 (Chromosome)	653692	655377	+	microcin ABC transporter ATP-binding protein	35	19	26	259	171	130	52	59	68	99	86	128	465	539	522	134.068	65.9511	84.0038	272.429	194.26	106.146	71.8273	104.155	82.1632	33.8925	39.2567	46.5901	106.968	266.182	420.08	6.97191	6.26283	6.49733	7.73774	7.36904	6.73199	6.33878	6.71263	6.47203	5.61922	5.75532	5.91473	6.73995	7.71342
B5M07_03205	CP020694 (Chromosome)	655374	656546	+	amidohydrolase	30	8	26	167	177	128	50	42	59	64	50	89	251	308	258	114.915	27.7689	84.0038	175.659	201.077	104.513	69.0647	74.1444	71.2886	21.9103	22.8237	32.3947	57.7399	152.104	207.626	6.67297	5.31279	6.34912	7.13581	7.28378	6.57893	6.15027	6.22241	6.18231	5.04891	5.08788	5.40613	5.9679	6.98082
B5M07_03210	CP020694 (Chromosome)	656619	657758	+	carboxypeptidase	10	10	10	219	195	174	47	28	37	76	49	53	338	331	218	38.3051	34.7111	32.3092	230.355	221.525	142.072	64.9209	49.4296	44.7064	26.0185	22.3672	19.2912	77.7533	163.463	175.436	5.52252	5.43068	5.36438	7.38661	7.34266	6.85443	6.02688	5.75461	5.65413	5.1303	4.99429	4.86005	6.21354	7.00869
B5M07_03215	CP020694 (Chromosome)	657800	658693	-	AraC family transcriptional regulator	10	7	12	8	11	8	7	8	27	41	44	30	42	15	17	38.3051	24.2978	38.771	8.41479	12.4963	6.53205	9.66906	14.1227	32.6236	14.0363	20.0848	10.9196	9.66166	7.40767	13.6808	4.82019	4.35848	4.84103	3.38069	3.73351	3.16177	3.50717	3.8491	4.68668	3.84038	4.1956	3.60023	3.48349	3.25274
B5M07_03220	CP020694 (Chromosome)	658848	659795	+	oxidoreductase	1	0	2	0	3	2	0	3	0	1	3	4	4	2	2	3.83051	0	6.46183	0	3.40808	1.63301	0	5.29603	0	0.342349	1.36942	1.45594	0.920158	0.98769	1.6095	0.977142	0.131671	1.44766	-0.277026	1.06362	0.5504	-0.20212	1.38465	-0.238967	-0.209203	0.444008	0.484344	0.196847	0.253388
B5M07_03225	CP020694 (Chromosome)	660028	661158	+	C4-dicarboxylate ABC transporter	112	94	113	3400	3191	4978	1409	327	1554	413	345	472	869	525	337	429.017	326.284	365.094	3576.29	3625.06	4064.57	1946.24	577.267	1877.67	141.39	157.483	171.801	199.904	259.269	271.201	8.89808	8.62727	8.73724	11.2011	11.2166	11.3483	10.5106	9.19977	10.4706	7.8443	7.94003	8.01784	8.1561	8.40146
B5M07_03230	CP020694 (Chromosome)	661233	661817	+	TRAP dicarboxylate transporter subunit DctQ	6	2	12	149	161	150	23	10	35	14	20	20	30	20	16	22.983	6.94222	38.771	156.726	182.9	122.476	31.7698	17.6534	42.2899	4.79288	9.12948	7.27971	6.90118	9.8769	12.876	4.54105	3.59953	5.05901	6.61812	6.79382	6.33901	4.86516	4.2875	5.16481	3.11915	3.66169	3.4602	3.40485	3.73313
B5M07_03235	CP020694 (Chromosome)	661814	663232	+	C4-dicarboxylate ABC transporter	17	14	42	530	504	667	200	37	241	159	91	139	175	98	47	65.1186	48.5956	135.698	557.48	572.557	544.609	276.259	65.3177	291.196	54.4335	41.5391	50.594	40.2569	48.3968	37.8233	6.28026	6.0088	7.00978	8.56178	8.59213	8.53557	7.77458	6.2744	7.83291	6.09102	5.83696	6.02118	5.80524	5.98016
B5M07_03240	CP020694 (Chromosome)	663240	664577	+	amidase	5	3	12	428	218	418	150	23	111	86	58	31	106	44	21	19.1525	10.4133	38.771	450.191	247.654	341.299	207.194	40.6029	134.119	29.442	26.4755	11.2836	24.3842	21.7292	16.8998	4.82076	4.37892	5.42966	8.08929	7.40479	7.77249	7.20211	5.46852	6.7192	5.14653	5.04594	4.2825	4.9644	4.86118
B5M07_03245	CP020694 (Chromosome)	664753	665712	+	D-glycerate dehydrogenase	1	7	5	386	308	437	112	30	130	100	59	40	129	30	12	3.83051	24.2978	16.1546	406.014	349.896	356.813	154.705	52.9603	157.077	34.2349	26.932	14.5594	29.6751	14.8153	9.657	3.87903	4.97908	4.64145	7.9565	7.78405	7.80784	6.85717	5.70941	6.87486	5.26831	5.03512	4.46567	5.12674	4.48589
B5M07_03250	CP020694 (Chromosome)	665726	666661	-	EamA family transporter	16	24	15	39	24	27	30	50	26	33	24	30	41	13	2	61.2881	83.3067	48.4637	41.0221	27.2646	22.0457	41.4388	88.2671	31.4153	11.2975	10.9554	10.9196	9.43162	6.41998	1.6095	5.52103	5.86186	5.27472	5.11693	4.69424	4.4821	5.12492	5.9425	4.83818	3.83743	3.8128	3.80689	3.66881	3.35415
B5M07_03255	CP020694 (Chromosome)	666658	667245	-	TetR family transcriptional regulator	9	8	15	9	6	15	2	5	9	19	5	12	20	3	5	34.4745	27.7689	48.4637	9.46664	6.81616	12.2476	2.76259	8.82671	10.8745	6.50463	2.28237	4.36783	4.60079	1.48153	4.02375	4.42975	4.20167	4.82671	3.16529	2.86713	3.41741	2.2078	3.09696	3.29555	2.8148	1.9693	2.46203	2.4995	1.70624
B5M07_03260	CP020694 (Chromosome)	667282	667821	-	TetR family transcriptional regulator	6	8	3	17	5	11	6	4	7	100	28	34	231	53	39	22.983	27.7689	9.69275	17.8814	5.68013	8.98157	8.28777	7.06137	8.45797	34.2349	12.7813	12.3755	53.1391	26.1738	31.3853	4.33641	4.5266	3.58116	4.10831	3.10634	3.46543	3.41373	3.30096	3.42531	4.77987	3.78277	3.75113	5.2552	4.49681
B5M07_03265	CP020694 (Chromosome)	667895	668965	+	alcohol dehydrogenase	6	12	11	45	55	42	32	22	33	105	96	142	315	147	72	22.983	41.6533	35.5401	47.3332	62.4814	34.2933	44.2014	38.8375	39.8733	35.9466	43.8215	51.6859	72.4624	72.5952	57.942	4.87911	5.41814	5.2657	5.54456	5.82999	5.22235	5.47542	5.34739	5.37237	5.26713	5.46642	5.63524	5.98877	5.98971
B5M07_03270	CP020694 (Chromosome)	669165	670292	+	sugar kinase	48	50	47	26	39	31	34	87	34	46	52	68	46	20	7	183.864	173.556	151.853	27.3481	44.305	25.3117	46.964	153.585	41.0816	15.748	23.7366	24.751	10.5818	9.8769	5.63325	6.9382	6.87463	6.72504	4.92448	5.40708	4.84779	5.4665	6.74628	5.32975	4.3923	4.78227	4.82209	4.0317	3.98744
B5M07_03275	CP020694 (Chromosome)	670296	671222	+	carbohydrate kinase	39	16	23	21	9	15	16	81	34	29	22	26	36	17	14	149.39	55.5378	74.3111	22.0888	10.2242	12.2476	22.1007	142.993	41.0816	9.92812	10.0424	9.46362	8.28142	8.39536	11.2665	6.52952	5.4253	5.74537	4.48921	3.77689	3.92688	4.49014	6.4963	5.12367	3.72193	3.7367	3.6797	3.55419	3.58048
B5M07_03280	CP020694 (Chromosome)	671372	672835	+	glucose-6-phosphate dehydrogenase	51	20	42	64	73	121	27	51	46	367	414	371	862	446	319	195.356	69.4222	135.698	67.3183	82.9299	98.7972	37.295	90.0325	55.581	125.642	188.98	135.039	198.294	220.255	256.715	7.39953	6.34917	7.01679	6.31016	6.51576	6.69142	5.76357	6.59888	6.12702	6.93846	7.36936	7.01366	7.42136	7.53423
B5M07_03285	CP020694 (Chromosome)	672832	674640	+	phosphogluconate dehydratase	34	20	39	101	80	281	47	91	81	522	612	933	821	650	487	130.237	69.4222	126.006	106.237	90.8821	229.438	64.9209	160.646	97.8708	178.706	279.362	339.598	188.862	320.999	391.913	7.11761	6.51578	7.08407	6.91115	6.75832	7.70301	6.44211	7.32963	6.83075	7.44028	7.91387	8.12525	7.49812	8.0639
B5M07_03290	CP020694 (Chromosome)	674644	675297	+	keto-deoxy-phosphogluconate aldolase	12	8	17	50	50	108	39	36	34	305	341	518	452	312	183	45.9661	27.7689	54.9256	52.5925	56.8013	88.1826	53.8705	63.5523	41.0816	104.416	155.658	188.544	103.978	154.08	147.269	5.77673	5.33479	5.94164	5.89177	5.96782	6.41329	5.91652	6.08065	5.65504	6.59038	7.01611	7.22448	6.58612	7.00501
B5M07_03295	CP020694 (Chromosome)	675438	676469	+	LacI family transcriptional regulator	21	13	22	32	32	32	20	32	35	141	189	244	148	77	60	80.4406	45.1244	71.0802	33.6592	36.3528	26.1282	27.6259	56.491	42.2899	48.2712	86.2735	88.8125	34.0458	38.0261	48.285	6.10555	5.51906	5.97839	5.22765	5.30312	4.98357	5.04166	5.74518	5.45282	5.58587	6.19292	6.2243	5.23459	5.34536
B5M07_03300	CP020694 (Chromosome)	676585	677889	+	sugar ABC transporter substrate-binding protein	307	382	782	532	510	998	287	275	357	16	16	15	15	15	12	1175.97	1325.96	2526.58	559.584	579.373	814.873	396.432	485.469	431.357	5.47758	7.30358	5.45978	3.45059	7.40767	9.657	9.50839	9.6489	10.4113	8.66107	8.70012	9.08849	8.27571	8.5005	8.36959	4.50853	4.68052	4.50982	4.27025	4.69266
B5M07_03305	CP020694 (Chromosome)	678008	678874	+	sugar ABC transporter permease	9	11	34	10	9	12	5	12	5	8	3	6	3	19	4	34.4745	38.1822	109.851	10.5185	10.2242	9.79807	6.90647	21.1841	6.04141	2.73879	1.36942	2.18391	0.690118	9.38305	3.219	4.47688	4.59941	5.8303	3.30146	3.27341	3.23458	2.91494	3.9979	2.79729	2.10154	1.66279	1.93728	1.20498	3.19418
B5M07_03310	CP020694 (Chromosome)	678887	679717	+	sugar ABC transporter permease	35	55	85	18	34	33	19	35	20	17	7	19	19	20	12	134.068	190.911	274.628	18.9333	38.6249	26.9447	26.2446	61.787	24.1656	5.81993	3.19532	6.91572	4.37075	9.8769	9.657	6.43931	6.85009	7.26926	4.37492	5.09396	4.72372	4.69659	5.59109	4.61431	3.30213	2.88413	3.4454	3.06523	3.76035
B5M07_03315	CP020694 (Chromosome)	679733	680737	+	sugar ABC transporter ATP-binding protein	30	24	28	16	14	23	26	26	16	32	9	20	8	15	9	114.915	83.3067	90.4656	16.8296	15.9044	18.7796	35.9137	45.8989	19.3325	10.9552	4.10826	7.27971	1.84032	7.40767	7.24275	6.15116	5.78806	5.88406	4.12395	4.06983	4.23105	4.89177	5.14954	4.25956	3.70648	2.87746	3.336	2.28098	3.35839
B5M07_03320	CP020694 (Chromosome)	680810	682315	+	mannitol dehydrogenase	20	20	27	23	22	34	14	21	17	15	19	38	14	23	20	76.6101	69.4222	87.2347	24.1925	24.9926	27.7612	19.3381	37.0722	20.5408	5.13523	8.673	13.8314	3.22055	11.3584	16.095	5.73079	5.62539	5.88191	4.53594	4.56835	4.67641	4.31522	4.96853	4.37358	3.11358	3.56072	3.98641	2.74437	3.80452
B5M07_03325	CP020694 (Chromosome)	682319	683581	-	MFS transporter	0	2	6	9	7	8	4	8	9	23	19	10	26	16	11	0	6.94222	19.3855	9.46664	7.95218	6.53205	5.52518	14.1227	10.8745	7.87402	8.673	3.63986	5.98103	7.90152	8.85225	1.84413	2.85329	3.77181	3.12138	2.96245	2.78876	2.65793	3.48994	3.24911	2.95552	3.04521	2.28785	2.70355	2.95837
B5M07_03330	CP020694 (Chromosome)	683578	684576	-	type I glyceraldehyde-3-phosphate dehydrogenase	4	0	4	4	1	6	1	6	4	22	7	15	28	17	7	15.322	0	12.9237	4.2074	1.13603	4.89904	1.38129	10.5921	4.83313	7.53168	3.19532	5.45978	6.4411	8.39536	5.63325	3.29988	1.45022	3.15074	2.2088	1.44373	2.32953	1.56066	3.00365	2.32041	2.71912	1.97509	2.42314	2.57496	2.81829
B5M07_03335	CP020694 (Chromosome)	684573	685415	-	ArsR family transcriptional regulator	1	4	1	0	0	2	0	3	2	13	14	3	22	13	6	3.83051	13.8844	3.23092	0	0	1.63301	0	5.29603	2.41656	4.45054	6.39063	1.09196	5.06087	6.41998	4.8285	1.7173	2.84459	1.61754	0.438051	0.467665	1.16169	0.54306	2.01094	1.42549	1.91365	2.23945	0.87093	2.03422	2.24179
B5M07_03340	CP020694 (Chromosome)	686040	686759	+	hypothetical protein	0	2	1	0	0	0	1	1	4	34	9	37	27	12	5	0	6.94222	3.23092	0	0	0	1.38129	1.76534	4.83313	11.6399	4.10826	13.4675	6.21106	5.92614	4.02375	0.983944	2.22562	1.67135	0.488384	0.518801	0.389164	1.16649	1.31132	1.9974	2.87438	1.87954	3.02231	2.26397	2.20745
B5M07_03345	CP020694 (Chromosome)	686830	687537	+	oxidoreductase	1	4	6	3	1	2	3	3	1	18	10	9	19	7	2	3.83051	13.8844	19.3855	3.15555	1.13603	1.63301	4.14388	5.29603	1.20828	6.16228	4.56474	3.27587	4.37075	3.45691	1.6095	1.97633	3.05001	3.40923	1.82095	1.2405	1.3767	2.02944	2.22145	1.27688	2.38906	2.1156	1.83435	2.07962	1.88075
B5M07_03350	CP020694 (Chromosome)	687553	689334	-	ATPase	45	58	37	294	146	177	55	63	63	723	800	831	625	400	457	172.373	201.324	119.544	309.244	165.86	144.522	75.9712	111.217	76.1218	247.518	365.179	302.472	143.775	197.538	367.771	7.44751	7.60721	7.08082	8.0628	7.40757	7.26698	6.64194	7.00712	6.64282	7.82566	8.24315	8.03972	7.26123	7.58834
B5M07_03355	CP020694 (Chromosome)	689748	691289	+	ATPase	72	67	24	243	135	198	152	199	243	250	282	372	754	531	401	275.796	232.564	77.542	255.599	153.364	161.668	209.957	351.303	293.613	85.5872	128.726	135.403	173.45	262.232	322.705	7.96176	7.78262	6.70254	7.88329	7.3542	7.40754	7.67677	8.2225	8.03049	6.77928	7.17731	7.22779	7.47926	7.9108
B5M07_03360	CP020694 (Chromosome)	691622	693070	+	hypothetical protein	38	52	28	98	179	254	95	102	103	162	180	233	528	549	380	145.559	180.498	90.4656	103.081	203.349	207.393	131.223	180.065	124.453	55.4605	82.1653	84.8086	121.461	271.121	305.805	7.16527	7.38842	6.68969	6.81418	7.51648	7.53778	7.05903	7.38733	7.00483	6.21186	6.58787	6.61871	6.97944	7.82594
B5M07_03365	CP020694 (Chromosome)	693077	693436	+	hypothetical protein	3	11	5	22	49	38	6	29	9	19	17	18	43	5	10	11.4915	38.1822	16.1546	23.1407	55.6653	31.0272	8.28777	51.1949	10.8745	6.50463	7.76005	6.55174	9.8917	2.46922	8.0475	3.64345	4.80007	3.93941	4.30916	5.24667	4.61832	3.3394	5.14472	3.57424	3.09392	3.255	3.10134	3.47305	2.36852
B5M07_03370	CP020694 (Chromosome)	693464	693540	-	#N/A	0	0	0	0	0	0	0	0	0	1	0	0	0	0	0	0	0	0	0	0	0	0	0	0	0.342349	0	0	0	0	0	-2.21025	-2.21289	-2.21482	-2.24495	-2.24288	-2.25174	-2.23763	-2.23105	-2.24122	-2.22597	-2.26736	-2.27014	-2.27041	-2.26524
B5M07_03375	CP020694 (Chromosome)	693644	694165	+	superoxide dismutase	18	15	27	49	59	84	26	28	22	12	12	21	9	3	4	68.9491	52.0667	87.2347	51.5406	67.0255	68.5865	35.9137	49.4296	26.5822	4.10819	5.47769	7.6437	2.07035	1.48153	3.219	5.60205	5.2981	5.8717	5.31308	5.60014	5.62914	4.92316	5.26005	4.61257	2.90452	3.14317	3.41694	2.40128	2.3037
B5M07_03380	CP020694 (Chromosome)	694390	694464	-	#N/A	0	0	0	0	0	0	0	2	0	2	0	0	0	0	1	0	0	0	0	0	0	0	3.53068	0	0.684698	0	0	0	0	0.80475	-1.36835	-1.39061	-1.40681	-1.66042	-1.64302	-1.71765	-1.59884	-0.63947	-1.62908	-1.30643	-1.81243	-1.82643	-1.84984	-1.80719
B5M07_03385	CP020694 (Chromosome)	694730	696001	+	UDP-N-acetylglucosamine 1-carboxyvinyltransferase	29	18	59	52	88	140	37	77	70	220	129	205	354	142	78	111.085	62.48	190.624	54.6962	99.9703	114.311	51.1079	135.931	84.5797	75.3168	58.8851	74.617	81.434	70.126	62.7705	6.67376	6.09462	7.25004	5.95757	6.56759	6.70839	5.89305	6.88999	6.39488	6.27607	6.02829	6.26657	6.35598	6.20367
B5M07_03390	CP020694 (Chromosome)	695998	696468	+	hypothetical protein	3	2	4	7	13	22	10	5	4	52	35	52	90	40	30	11.4915	6.94222	12.9237	7.36294	14.7683	17.9631	13.8129	8.82671	4.83313	17.8021	15.9766	18.9272	20.7035	19.7538	24.1425	3.62427	3.24603	3.7205	3.21897	3.84314	4.03577	3.77942	3.38645	2.90382	4.03058	3.92225	4.09195	4.18419	4.1338
B5M07_03395	CP020694 (Chromosome)	696498	696827	+	hypothetical protein	0	0	0	1	3	4	3	3	1	4	6	7	5	0	6	0	0	0	1.05185	3.40808	3.26602	4.14388	5.29603	1.20828	1.3694	2.73884	2.5479	1.1502	0	4.8285	0.484601	0.443749	0.414015	0.590497	1.30492	1.28816	1.44617	1.62737	0.661556	0.688507	1.169	1.11751	0.575196	-0.165685
B5M07_03400	CP020694 (Chromosome)	696879	698180	+	histidinol dehydrogenase	6	3	3	23	30	39	14	19	20	123	110	137	141	68	33	22.983	10.4133	9.69275	24.1925	34.0808	31.8437	19.3381	33.5415	24.1656	42.1089	50.2121	49.866	32.4356	33.5814	26.5568	4.62051	3.97645	3.91922	4.65954	5.00054	4.93263	4.44783	4.98246	4.65891	5.22208	5.40624	5.39956	4.95282	4.98755
B5M07_03405	CP020694 (Chromosome)	698336	698815	+	hypothetical protein	1	1	2	12	8	15	2	6	6	113	47	61	112	38	21	3.83051	3.47111	6.46183	12.6222	9.08821	12.2476	2.76259	10.5921	7.24969	38.6854	21.4543	22.2031	25.7644	18.7661	16.8998	2.83243	2.76693	3.10962	3.63443	3.33364	3.60611	2.48196	3.47463	3.14119	4.79067	4.16644	4.20321	4.36022	4.02907
B5M07_03410	CP020694 (Chromosome)	698816	699277	+	low molecular weight phosphatase family protein	0	4	0	8	0	3	4	0	1	8	13	8	31	15	5	0	13.8844	0	8.41479	0	2.44952	5.52518	0	1.20828	2.73879	5.93416	2.91188	7.13122	7.40767	4.02375	1.02162	2.90529	0.960599	2.52609	0.559646	1.49341	2.12549	0.731654	1.11923	1.56379	2.22559	1.61287	2.40878	2.43189
B5M07_03415	CP020694 (Chromosome)	699282	699623	-	hypothetical protein	3	1	2	15	5	14	5	4	7	38	28	36	73	36	18	11.4915	3.47111	6.46183	15.7777	5.68013	11.4311	6.90647	7.06137	8.45797	13.0093	12.7813	13.1035	16.7929	17.7784	14.4855	3.46392	2.66742	3.01854	3.77813	2.86528	3.46937	3.02856	3.05446	3.19658	3.59668	3.57851	3.60356	3.85175	3.90523
B5M07_03420	CP020694 (Chromosome)	699859	701661	+	elongation factor 4	16	27	26	245	193	305	62	32	82	443	300	284	924	255	206	61.2881	93.72	84.0038	257.703	219.253	249.034	85.6403	56.491	99.0791	151.661	136.942	103.372	212.556	125.93	165.779	6.28337	6.68531	6.57798	7.73868	7.56427	7.70202	6.59224	6.19586	6.73709	7.1742	7.06764	6.77886	7.53232	6.98086
B5M07_03425	CP020694 (Chromosome)	702767	703279	+	PhnA protein	0	0	1	1	3	24	0	3	0	57	32	12	56	3	1	0	0	3.23092	1.05185	3.40808	19.5961	0	5.29603	0	19.5139	14.6072	4.36783	12.8822	1.48153	0.80475	1.11203	1.07412	1.78473	1.09489	1.80776	3.49812	0.692686	2.15701	0.635178	3.51647	3.20329	2.02096	3.08388	1.18613
B5M07_03430	CP020694 (Chromosome)	703406	704236	+	3-keto-5-aminohexanoate cleavage protein	6	2	6	21	5	8	13	8	18	105	122	132	143	95	48	22.983	6.94222	19.3855	22.0888	5.68013	6.53205	17.9568	14.1227	21.7491	35.9466	55.6898	48.0461	32.8956	46.9153	38.628	4.50733	3.56708	4.35029	4.46996	3.30178	3.38205	4.27136	4.05534	4.45484	4.96823	5.4327	5.27494	4.87654	5.24829
B5M07_03435	CP020694 (Chromosome)	704317	705087	+	MBL fold metallo-hydrolase	16	9	9	112	107	216	50	55	95	110	156	230	179	178	92	61.2881	31.24	29.0782	117.807	121.555	176.365	69.0647	97.0938	114.787	37.6584	71.2099	83.7167	41.1771	87.9044	74.037	6.01489	5.39054	5.32606	6.68796	6.72114	7.12468	6.13171	6.48235	6.65996	5.529	6.16264	6.32972	5.61445	6.38041
B5M07_03440	CP020694 (Chromosome)	705364	706419	+	C4-dicarboxylate ABC transporter substrate-binding protein	48	37	43	153	176	221	134	68	123	30	14	13	27	9	10	183.864	128.431	138.929	160.933	199.941	180.448	185.094	120.043	148.619	10.2705	6.39063	4.73181	6.21106	4.4446	8.0475	7.03406	6.63714	6.72469	6.89769	7.14044	7.02662	7.05257	6.57078	6.80851	4.16095	3.80231	3.58104	3.75519	3.56059
B5M07_03445	CP020694 (Chromosome)	706446	706979	+	C4-dicarboxylate ABC transporter permease	7	2	2	23	17	20	5	13	13	3	2	1	3	0	1	26.8135	6.94222	6.46183	24.1925	19.3124	16.3301	6.90647	22.9494	15.7077	1.02705	0.912948	0.363986	0.690118	0	0.80475	3.93599	2.59805	2.54286	3.92174	3.67302	3.5058	2.62669	3.83711	3.4494	1.13705	1.11598	0.708755	0.87286	0.501208
B5M07_03450	CP020694 (Chromosome)	706979	708319	+	C4-dicarboxylate ABC transporter permease	48	14	9	60	32	93	38	49	58	30	19	19	35	9	9	183.864	48.5956	29.0782	63.1109	36.3528	75.9351	52.4892	86.5018	70.0804	10.2705	8.673	6.91572	8.05138	4.4446	7.24275	6.83681	5.36616	4.84987	5.66101	5.07781	5.8641	5.46098	5.99976	5.77341	3.85335	3.71194	3.51629	3.63409	3.19185
B5M07_03455	CP020694 (Chromosome)	708316	709104	+	IclR family transcriptional regulator	15	7	9	16	21	17	13	19	33	17	9	11	20	16	9	57.4576	24.2978	29.0782	16.8296	23.8566	13.8806	17.9568	33.5415	39.8733	5.81993	4.10826	4.00384	4.60079	7.90152	7.24275	5.25023	4.34167	4.52697	3.99887	4.34917	3.81179	4.06086	4.69635	4.88941	3.00999	2.73736	2.70708	2.80378	3.28408
B5M07_03460	CP020694 (Chromosome)	709122	711218	+	3-hydroxyacyl-CoA dehydrogenase	44	27	43	201	214	263	152	143	224	157	67	128	222	120	82	168.542	93.72	138.929	211.422	243.11	214.741	209.957	252.444	270.655	53.7488	30.5837	46.5901	51.0688	59.2614	65.9895	7.23925	6.63684	7.03745	7.4858	7.63709	7.50305	7.47772	7.67696	7.75425	6.08404	5.56649	5.94852	6.0343	6.17899
B5M07_03465	CP020694 (Chromosome)	711215	712390	+	acetyl-CoA acetyltransferase	13	10	12	70	87	81	53	36	51	69	27	38	99	50	44	49.7966	34.7111	38.771	73.6294	98.8343	66.137	73.2086	63.5523	61.6224	23.6221	12.3248	13.8314	22.7739	24.6922	35.409	5.53535	5.18152	5.28795	5.95287	6.26994	5.83989	5.94514	5.79369	5.76361	4.79656	4.20302	4.30064	4.76006	4.8408
B5M07_03470	CP020694 (Chromosome)	712402	713601	+	pimeloyl-CoA dehydrogenase large subunit	5	4	10	153	172	184	112	30	101	139	65	81	175	97	37	19.1525	13.8844	32.3092	160.933	195.397	150.237	154.705	52.9603	122.036	47.5865	29.6708	29.4828	40.2569	47.903	29.7758	4.8526	4.6063	5.28573	6.93445	7.14951	6.85962	6.88959	5.75445	6.63093	5.6449	5.18056	5.17345	5.47684	5.65188
B5M07_03475	CP020694 (Chromosome)	713598	714731	+	pimeloyl-CoA dehydrogenase small subunit	6	5	7	65	102	90	57	23	65	71	53	62	76	47	28	22.983	17.3556	22.6164	68.3702	115.875	73.4855	78.7338	40.6029	78.5383	24.3068	24.1931	22.5671	17.483	23.2107	22.533	4.75823	4.5174	4.7389	5.83672	6.40822	5.91515	5.9859	5.2919	5.98424	4.78055	4.77697	4.70892	4.46542	4.73729
B5M07_03480	CP020694 (Chromosome)	714712	715119	+	hypothetical protein	0	2	2	14	15	23	15	8	14	11	7	11	24	24	6	0	6.94222	6.46183	14.7259	17.0404	18.7796	20.7194	14.1227	16.9159	3.76584	3.19532	4.00384	5.52095	11.8523	4.8285	1.9225	2.91628	2.86184	3.59845	3.7435	3.85006	3.93835	3.54375	3.73449	2.35923	2.24137	2.41053	2.67816	3.39372
B5M07_03485	CP020694 (Chromosome)	715116	715883	+	enoyl-CoA hydratase	0	1	1	25	11	25	11	11	16	22	18	7	18	7	13	0	3.47111	3.23092	26.2962	12.4963	20.4126	15.1942	19.4188	19.3325	7.53168	8.21653	2.5479	4.14071	3.45691	10.4618	1.92445	2.49093	2.44408	4.20188	3.43921	3.94111	3.62736	3.8674	3.87558	2.96438	3.04588	2.06301	2.42974	2.30486
B5M07_03490	CP020694 (Chromosome)	715937	717439	+	long-chain fatty acid--CoA ligase	5	6	5	121	72	156	85	40	64	54	28	43	100	38	7	19.1525	20.8267	16.1546	127.274	81.7939	127.375	117.41	70.6137	77.33	18.4868	12.7813	15.6514	23.0039	18.7661	5.63325	4.57458	4.64212	4.42469	6.50196	6.01384	6.50438	6.40987	5.8511	5.9525	4.49289	4.1554	4.33703	4.70243	4.50958
B5M07_03495	CP020694 (Chromosome)	717467	718156	-	ribulose-phosphate 3-epimerase	6	3	5	13	11	2	1	2	3	33	15	16	43	10	2	22.983	10.4133	16.1546	13.674	12.4963	1.63301	1.38129	3.53068	3.62485	11.2975	6.84711	5.82377	9.8917	4.93845	1.6095	3.8744	3.1067	3.52766	3.41774	3.32607	1.72354	1.73949	2.2671	2.2579	3.24533	2.7643	2.61675	3.11678	2.47398
B5M07_03500	CP020694 (Chromosome)	718221	721427	-	NAD-binding oxidoreductase	6	3	7	35	23	18	22	16	23	328	168	168	377	177	112	22.983	10.4133	22.6164	36.8147	26.1286	14.6971	30.3885	28.2455	27.7905	112.29	76.6876	61.1496	86.7249	87.4105	90.132	4.81634	4.20311	4.79602	5.24219	4.9077	4.37601	5.05437	4.98632	4.96722	6.4204	6.00582	5.76543	6.13943	6.14654
B5M07_03505	CP020694 (Chromosome)	721550	722569	+	ABC transporter substrate-binding protein	4	3	10	46	32	49	38	10	37	85	57	61	166	73	26	15.322	10.4133	32.3092	48.3851	36.3528	40.0088	52.4892	17.6534	44.7064	29.0997	26.019	22.2031	38.1865	36.0507	20.9235	4.30587	4.01043	4.96755	5.38594	5.09008	5.18953	5.4694	4.39611	5.30257	4.86622	4.7545	4.59793	5.1438	5.0836
B5M07_03510	CP020694 (Chromosome)	722746	724005	+	sodium:proton antiporter	7	5	3	19	26	29	27	8	12	29	42	40	56	11	12	26.8135	17.3556	9.69275	19.9851	29.5367	23.6787	37.295	14.1227	14.4994	9.92812	19.1719	14.5594	12.8822	5.43229	9.657	4.48586	4.0729	3.58172	4.21682	4.61268	4.38894	4.8543	3.88386	3.90629	3.54481	4.17865	3.90752	3.78852	3.03067
B5M07_03515	CP020694 (Chromosome)	724087	724854	+	nitrate ABC transporter ATP-binding protein	1	4	1	15	10	10	5	3	7	40	19	21	60	8	14	3.83051	13.8844	3.23092	15.7777	11.3603	8.16506	6.90647	5.29603	8.45797	13.694	8.673	7.6437	13.8024	3.95076	11.2665	2.57562	3.50985	2.46591	3.67493	3.35432	3.05113	2.90957	2.70835	3.08311	3.54752	3.10623	2.98931	3.55736	2.43052
B5M07_03520	CP020694 (Chromosome)	724925	725653	+	ABC transporter permease	6	4	1	14	44	45	10	7	21	57	32	51	67	54	14	22.983	13.8844	3.23092	14.7259	49.9852	36.7428	13.8129	12.3574	25.3739	19.5139	14.6072	18.5633	15.4126	26.6676	11.2665	4.39218	3.93832	3.01089	3.97451	5.21815	4.89291	3.91756	3.82172	4.50597	4.24666	3.96293	4.1969	4.0136	4.56229
B5M07_03525	CP020694 (Chromosome)	725980	726894	+	aminotransferase class IV	3	2	1	9	11	3	5	1	5	68	50	72	51	49	16	11.4915	6.94222	3.23092	9.46664	12.4963	2.44952	6.90647	1.76534	6.04141	23.2797	22.8237	26.207	11.732	24.1984	12.876	3.44644	3.05081	2.59206	3.27908	3.53832	2.22664	3.00868	2.19935	2.8952	4.17693	4.154	4.30095	3.48375	4.21442
B5M07_03530	CP020694 (Chromosome)	726937	728346	-	hypothetical protein	2	0	0	3	0	6	1	6	1	2	1	3	1	0	1	7.66101	0	0	3.15555	0	4.89904	1.38129	10.5921	1.20828	0.684698	0.456474	1.09196	0.230039	0	0.80475	1.58182	0.0987502	0.0688425	1.01415	-0.31565	1.42623	0.425874	2.10455	0.354249	0.0119863	-0.142899	0.278069	-0.446562	-0.567704
B5M07_03535	CP020694 (Chromosome)	728387	728761	-	hypothetical protein	0	0	0	2	0	3	0	0	0	0	0	0	2	0	0	0	0	0	2.1037	0	2.44952	0	0	0	0	0	0	0.460079	0	0	-1.21276	-1.23501	-1.25121	-0.680231	-1.48723	-0.558146	-1.44309	-1.38769	-1.47331	-1.65217	-1.63582	-1.64891	-1.29955	-1.63089
B5M07_03540	CP020694 (Chromosome)	728780	729271	-	hypothetical protein	0	0	3	11	1	28	2	0	0	5	4	5	6	0	0	0	0	9.69275	11.5703	1.13603	22.8622	2.76259	0	0	1.71174	1.8259	1.81993	1.38024	0	0	0.487253	0.443328	2.2085	2.56732	0.628839	3.33109	1.19085	0.173053	0.0338156	0.847912	0.898216	0.895016	0.682648	-0.301918
B5M07_03545	CP020694 (Chromosome)	729314	729685	-	hypothetical protein	7	1	5	3	3	31	7	3	1	2	7	4	27	0	3	26.8135	3.47111	16.1546	3.15555	3.40808	25.3117	9.66906	5.29603	1.20828	0.684698	3.19532	1.45594	6.21106	0	2.41425	3.82059	1.97015	3.28642	1.85959	1.91992	3.87576	2.83733	2.27239	1.30466	0.828775	1.84989	1.25583	2.44836	0.384222
B5M07_03550	CP020694 (Chromosome)	729945	731738	+	integrase	10	5	5	10	9	15	11	8	32	63	98	83	208	164	69	38.3051	17.3556	16.1546	10.5185	10.2242	12.2476	15.1942	14.1227	38.665	21.568	44.7344	30.2108	47.8482	80.9906	55.5278	5.06743	4.3227	4.25903	3.8519	3.83107	3.97668	4.18107	4.1226	5.09234	4.50352	5.2501	4.84243	5.32314	5.89085
B5M07_03555	CP020694 (Chromosome)	731906	732310	+	transcriptional regulator	0	3	0	0	0	0	3	0	0	6	2	1	7	7	0	0	10.4133	0	0	0	0	4.14388	0	0	2.05409	0.912948	0.363986	1.61028	3.45691	0	-0.147762	1.65764	-0.214568	-0.619855	-0.599985	-0.685337	0.956117	-0.451772	-0.584121	0.488732	-0.0602413	-0.478324	0.31563	0.89974
B5M07_03560	CP020694 (Chromosome)	733457	735484	+	ATP-dependent endonuclease	3	18	16	20	20	11	21	22	47	180	120	166	216	143	119	11.4915	62.48	51.6947	21.037	22.7205	8.98157	29.0072	38.8375	56.7892	61.6228	54.7769	60.4216	49.6885	70.6198	95.7653	4.28094	5.77427	5.5804	4.7027	4.77519	3.9695	5.00852	5.29498	5.68333	5.77224	5.64819	5.7514	5.54732	5.91603
B5M07_03565	CP020694 (Chromosome)	735481	737799	+	hypothetical protein	27	15	13	111	102	86	99	73	197	486	507	579	792	553	417	103.424	52.0667	42.0019	116.755	115.875	70.2195	136.748	128.87	238.032	166.382	231.432	210.748	182.191	273.096	335.581	6.82724	6.18404	5.99705	6.94506	6.93746	6.44201	7.10654	7.04589	7.68952	7.31041	7.66033	7.5603	7.40597	7.83887
B5M07_03570	CP020694 (Chromosome)	738458	738640	+	hypothetical protein	0	0	0	0	0	0	0	0	0	0	0	0	1	0	0	0	0	0	0	0	0	0	0	0	0	0	0	0.230039	0	0	-2.27419	-2.276	-2.27732	-2.29793	-2.29652	-2.30258	-2.29293	-2.28842	-2.29539	-2.31565	-2.31326	-2.31561	-2.29461	-2.31182
B5M07_03575	CP020694 (Chromosome)	738671	739000	-	QacE family quaternary ammonium compound efflux SMR transporter	0	0	0	0	0	0	0	0	0	0	0	0	0	0	0	0	0	0	0	0	0	0	0	0	0	0	0	0	0	0	0	0	0	0	0	0	0	0	0	0	0	0	0	0
B5M07_03580	CP020694 (Chromosome)	739033	740736	-	transposase	0	0	0	0	0	0	0	0	0	0	0	0	0	0	0	0	0	0	0	0	0	0	0	0	0	0	0	0	0	0	0	0	0	0	0	0	0	0	0	0	0	0	0	0
B5M07_03585	CP020694 (Chromosome)	740806	741153	-	transposase	0	0	0	0	0	0	0	0	0	0	0	0	0	0	0	0	0	0	0	0	0	0	0	0	0	0	0	0	0	0	0	0	0	0	0	0	0	0	0	0	0	0	0	0
B5M07_03590	CP020694 (Chromosome)	741150	741515	-	transposase	0	0	0	0	0	0	0	0	0	0	0	0	0	0	0	0	0	0	0	0	0	0	0	0	0	0	0	0	0	0	0	0	0	0	0	0	0	0	0	0	0	0	0	0
B5M07_03595	CP020694 (Chromosome)	742100	743527	+	hypothetical protein	2	2	0	1	7	15	14	0	7	46	24	34	100	52	46	7.66101	6.94222	0	1.05185	7.95218	12.2476	19.3381	0	8.45797	15.748	10.9554	12.3755	23.0039	25.6799	37.0185	3.08843	3.01271	1.96539	1.82548	3.09312	3.49522	3.94237	1.66741	3.14836	3.75194	3.38981	3.51001	4.14625	4.25676
B5M07_03600	CP020694 (Chromosome)	743571	746966	-	restriction endonuclease subunit R	16	18	16	222	138	216	121	52	206	763	626	710	1368	804	479	61.2881	62.48	51.6947	233.511	156.772	176.365	167.137	91.7978	248.906	261.212	285.753	258.43	314.694	397.051	385.475	6.4594	6.47357	6.30689	7.76297	7.34916	7.46999	7.41476	6.81958	7.83039	7.88238	7.97821	7.87096	8.08216	8.3344
B5M07_03605	CP020694 (Chromosome)	746990	747493	-	hypothetical protein	1	0	2	39	27	30	7	14	29	98	84	69	111	65	40	3.83051	0	6.46183	41.0221	30.6727	24.4952	9.66906	24.7148	35.0402	33.5502	38.3438	25.115	25.5344	32.0999	32.19	3.22674	2.67308	3.46151	5.0683	4.76455	4.53775	3.68037	4.54311	4.90158	4.8635	5.00265	4.56483	4.5823	4.81627
B5M07_03610	CP020694 (Chromosome)	747498	748664	-	hypothetical protein	5	1	6	13	33	25	31	2	18	148	112	114	189	80	41	19.1525	3.47111	19.3855	13.674	37.4889	20.4126	42.8201	3.53068	21.7491	50.6676	51.1251	41.4943	43.4775	39.5076	32.9948	4.40443	3.30332	4.41159	4.07459	5.05554	4.44643	5.1923	3.14851	4.50942	5.37819	5.38685	5.16645	5.21659	5.11413
B5M07_03615	CP020694 (Chromosome)	748661	750199	-	DNA methyltransferase	16	4	9	19	17	32	33	30	24	146	117	121	160	70	55	61.2881	13.8844	29.0782	19.9851	19.3124	26.1282	45.5827	52.9603	28.9988	49.9829	53.4074	44.0422	36.8063	34.5691	44.2613	5.69247	4.32569	4.95252	4.58837	4.55804	4.84034	5.39671	5.55027	4.9435	5.496	5.5649	5.36441	5.18044	5.11676
B5M07_03620	CP020694 (Chromosome)	750351	751400	-	hypothetical protein	17	10	15	18	6	20	32	32	30	67	48	92	128	61	41	65.1186	34.7111	48.4637	18.9333	6.81616	16.3301	44.2014	56.491	36.2485	22.9374	21.9107	33.4867	29.445	30.1245	32.9948	5.68967	5.04582	5.38342	4.45967	3.6089	4.31923	5.29787	5.55263	5.09491	4.63744	4.59345	5.01626	4.88585	4.90887
B5M07_03625	CP020694 (Chromosome)	751682	751897	+	hypothetical protein	0	0	1	0	1	1	2	0	1	0	1	4	3	0	1	0	0	3.23092	0	1.13603	0.816506	2.76259	0	1.20828	0	0.456474	1.45594	0.690118	0	0.80475	-0.463577	-0.496607	0.149858	-0.892414	-0.264348	-0.405695	0.259214	-0.723282	-0.237223	-1.07152	-0.633058	-0.0769431	-0.478496	-1.01902
B5M07_03630	CP020694 (Chromosome)	752001	752921	-	DUF91 domain-containing protein	14	8	14	33	32	31	18	26	37	165	146	165	407	177	94	53.6271	27.7689	45.2328	34.711	36.3528	25.3117	24.8633	45.8989	44.7064	56.4876	66.6452	60.0576	93.6261	87.4105	75.6465	5.69763	5.07444	5.52955	5.26583	5.3113	4.96255	4.95305	5.54301	5.51627	5.75495	5.92686	5.81847	6.2883	6.21369
B5M07_03635	CP020694 (Chromosome)	753637	754149	-	hypothetical protein	1	2	0	1	1	2	1	0	0	6	2	2	8	3	2	3.83051	6.94222	0	1.05185	1.13603	1.63301	1.38129	0	0	2.05409	0.912948	0.727971	1.84032	1.48153	1.6095	0.972057	1.48521	0.112495	0.313886	0.351978	0.55044	0.449947	-0.121252	-0.222422	0.722939	0.218446	0.0996221	0.649	0.495325
B5M07_03640	CP020694 (Chromosome)	754849	755130	+	hypothetical protein	0	0	0	0	0	0	0	0	0	0	0	0	0	0	0	0	0	0	0	0	0	0	0	0	0	0	0	0	0	0	0	0	0	0	0	0	0	0	0	0	0	0	0	0
B5M07_03645	CP020694 (Chromosome)	756393	757751	-	benzoate transporter	7	3	4	8	18	23	9	16	11	10	10	7	3	8	1	26.8135	10.4133	12.9237	8.41479	20.4485	18.7796	12.4317	28.2455	13.2911	3.42349	4.56474	2.5479	0.690118	3.95076	0.80475	4.12853	3.20234	3.40224	3.03112	3.90947	3.82865	3.39779	4.23741	3.46703	2.23608	2.48169	2.01036	1.18814	2.36373
B5M07_03650	CP020694 (Chromosome)	757690	758496	-	crotonase	1	0	3	6	3	4	1	4	2	0	2	3	7	6	1	3.83051	0	9.69275	6.31109	3.40808	3.26602	1.38129	7.06137	2.41656	0	0.912948	1.09196	1.61028	2.96307	0.80475	1.46597	0.615146	2.28027	2.00646	1.46874	1.44685	0.889653	2.06529	1.2138	-0.181531	0.595192	0.679022	0.917401	1.37975
B5M07_03655	CP020694 (Chromosome)	758532	760061	-	4-chlorobenzoate--CoA ligase	4	2	3	5	6	21	14	7	11	3	7	2	5	3	5	15.322	6.94222	9.69275	5.25925	6.81616	17.1466	19.3381	12.3574	13.2911	1.02705	3.19532	0.727971	1.1502	1.48153	4.02375	3.34588	2.63401	2.92294	2.42005	2.6465	3.5636	3.67024	3.19542	3.28688	1.21424	1.99545	1.055	1.24042	1.46261
B5M07_03660	CP020694 (Chromosome)	760054	760560	-	(2Fe-2S)-binding protein	1	0	1	1	2	6	1	2	2	0	0	2	3	1	1	3.83051	0	3.23092	1.05185	2.27205	4.89904	1.38129	3.53068	2.41656	0	0	0.727971	0.690118	0.493845	0.80475	0.894392	0.0546045	0.812183	0.236192	0.689647	1.34245	0.374208	0.975689	0.728996	-0.647735	-0.579813	0.0213948	-0.0212544	-0.124351
B5M07_03665	CP020694 (Chromosome)	760548	761375	-	carbon monoxide dehydrogenase	0	0	0	3	10	5	5	3	5	7	0	0	0	0	4	0	0	0	3.15555	11.3603	4.08253	6.90647	5.29603	6.04141	2.39644	0	0	0	0	3.219	0.432957	0.390248	0.359162	1.25052	2.45304	1.48471	1.92864	1.64717	1.81371	1.06433	-0.329821	-0.400717	-0.531979	-0.304426
B5M07_03670	CP020694 (Chromosome)	761372	764353	-	carbon monoxide dehydrogenase	4	7	8	35	32	34	72	13	35	34	8	12	13	9	4	15.322	24.2978	25.8473	36.8147	36.3528	27.7612	99.4532	22.9494	42.2899	11.6399	3.65179	4.36783	2.99051	4.4446	3.219	3.94708	4.38366	4.44791	4.84348	4.82883	4.54768	5.94133	4.34183	4.99062	3.67696	2.68586	2.81194	2.50126	2.83965
B5M07_03675	CP020694 (Chromosome)	764469	765323	-	AraC family transcriptional regulator	105	60	70	261	204	269	228	196	299	386	330	400	680	509	269	402.203	208.267	226.164	274.533	231.749	219.64	314.935	346.007	361.276	132.147	150.636	145.594	156.427	251.367	216.478	8.4346	7.74465	7.82896	8.03068	7.85409	7.79863	8.1753	8.27507	8.32159	7.28594	7.41579	7.38176	7.45316	7.9386
B5M07_03680	CP020694 (Chromosome)	766157	767299	-	hypothetical protein	2	6	3	23	13	24	11	15	21	104	90	107	187	92	52	7.66101	20.8267	9.69275	24.1925	14.7683	19.5961	15.1942	26.4801	25.3739	35.6043	41.0826	38.9465	43.0174	45.4337	41.847	3.71746	4.47459	3.85155	4.6106	4.14395	4.40491	4.17342	4.69916	4.65759	5.00372	5.1522	5.09695	5.20219	5.25789
B5M07_03685	CP020694 (Chromosome)	767536	768726	+	hypothetical protein	0	4	2	9	24	11	11	3	10	79	66	87	113	93	44	0	13.8844	6.46183	9.46664	27.2646	8.98157	15.1942	5.29603	12.0828	27.0456	30.1273	31.6667	25.9945	45.9276	35.409	2.51939	3.88527	3.30581	3.52582	4.53969	3.47367	3.95936	3.10464	3.74585	4.53961	4.65089	4.70429	4.49964	5.09923
B5M07_03695	CP020694 (Chromosome)	769234	769500	+	hypothetical protein	1	1	0	0	0	0	0	0	0	0	0	0	1	0	0	3.83051	3.47111	0	0	0	0	0	0	0	0	0	0	0.230039	0	0	-1.09782	-1.12501	-1.69667	-2.00634	-1.98509	-2.07622	-1.93115	-1.86346	-1.96808	-2.28332	-2.23668	-2.27666	-1.96407	-2.21497
B5M07_03700	CP020694 (Chromosome)	770199	771728	-	hypothetical protein	3	0	1	1	3	11	13	1	2	16	3	9	18	11	14	11.4915	0	3.23092	1.05185	3.40808	8.98157	17.9568	1.76534	2.41656	5.47758	1.36942	3.27587	4.14071	5.43229	11.2665	2.89326	1.26415	1.92967	1.25557	1.92589	2.76694	3.43494	1.56057	1.69437	2.31926	1.27706	1.87607	2.07137	2.30898
B5M07_03705	CP020694 (Chromosome)	771725	773650	-	hypothetical protein	21	14	18	33	14	14	24	40	19	65	51	71	93	64	30	80.4406	48.5956	58.1565	34.711	15.9044	11.4311	33.1511	70.6137	22.9574	22.2527	23.2802	25.843	21.3937	31.6061	24.1425	5.92732	5.39708	5.5854	5.06329	4.31524	4.02005	5.01646	5.80146	4.65621	4.6202	4.66505	4.76747	4.58093	4.96923
B5M07_03710	CP020694 (Chromosome)	773932	775134	+	hypothetical protein	1	1	5	3	6	6	10	1	3	34	28	27	59	53	32	3.83051	3.47111	16.1546	3.15555	6.81616	4.89904	13.8129	1.76534	3.62485	11.6399	12.7813	9.82761	13.5723	26.1738	25.752	2.58891	2.52449	3.67483	2.31749	2.9068	2.62494	3.55406	2.08719	2.42295	3.40173	3.49235	3.23715	3.55583	4.22798
B5M07_03715	CP020694 (Chromosome)	775323	775985	-	hypothetical protein	0	1	1	1	1	1	1	2	3	6	2	2	22	1	3	0	3.47111	3.23092	1.05185	1.13603	0.816506	1.38129	3.53068	3.62485	2.05409	0.912948	0.727971	5.06087	0.493845	2.41425	0.424529	1.16401	1.12604	0.5363	0.575494	0.409933	0.676353	1.25066	1.30159	0.913925	0.422277	0.301819	1.65307	0.174121
B5M07_03720	CP020694 (Chromosome)	776292	779126	-	hypothetical protein	7	13	15	17	15	29	8	10	14	91	75	77	159	84	62	26.8135	45.1244	48.4637	17.8814	17.0404	23.6787	11.0504	17.6534	16.9159	31.1537	34.2355	28.0269	36.5763	41.483	49.8945	4.75737	5.27158	5.34683	4.36677	4.32324	4.63341	3.95127	4.36313	4.31747	4.90737	5.00341	4.80024	5.07242	5.20178
B5M07_03725	CP020694 (Chromosome)	779133	779207	-	#N/A	0	0	0	0	0	0	0	0	0	0	0	0	0	0	0	0	0	0	0	0	0	0	0	0	0	0	0	0	0	0	0	0	0	0	0	0	0	0	0	0	0	0	0	0
B5M07_03730	CP020694 (Chromosome)	779270	780613	-	mechanosensitive ion channel protein MscS	0	0	7	12	20	43	15	9	21	69	82	87	120	49	30	0	0	22.6164	12.6222	22.7205	35.1098	20.7194	15.8881	25.3739	23.6221	37.4309	31.6667	27.6047	24.1984	24.1425	2.64488	2.59357	4.40541	3.85653	4.41856	4.86688	4.32662	4.07399	4.52898	4.46156	4.93802	4.76331	4.62196	4.48523
B5M07_03735	CP020694 (Chromosome)	780680	781672	-	zinc-binding dehydrogenase	1	1	10	23	11	18	13	1	10	149	88	104	209	73	60	3.83051	3.47111	32.3092	24.1925	12.4963	14.6971	17.9568	1.76534	12.0828	51.01	40.1697	37.8545	48.0782	36.0507	48.285	3.21058	3.14406	4.79486	4.51658	3.88563	4.03075	4.22428	2.70027	3.8568	5.30293	5.04583	4.98384	5.24031	4.93113
B5M07_03740	CP020694 (Chromosome)	781750	782259	-	aspartyl-trna synthetase	0	5	5	26	43	17	12	2	10	304	166	216	480	167	82	0	17.3556	16.1546	27.3481	48.8491	13.8806	16.5755	3.53068	12.0828	104.074	75.7747	78.6209	110.419	82.4721	65.9895	3.05357	4.42285	4.35949	4.82389	5.41648	4.1799	4.35156	3.27608	4.06997	6.24138	5.89147	5.93237	6.308	5.98371
B5M07_03745	CP020694 (Chromosome)	782415	783401	+	D-glycerate dehydrogenase	9	12	17	23	17	28	28	24	33	221	117	175	243	126	67	34.4745	41.6533	54.9256	24.1925	19.3124	22.8622	38.6763	42.3682	39.8733	75.6591	53.4074	63.6975	55.8996	62.2245	53.9183	5.21399	5.39422	5.67008	4.86551	4.66121	4.8099	5.31955	5.41056	5.34967	6.01437	5.64789	5.83216	5.69586	5.80713
B5M07_03750	CP020694 (Chromosome)	783503	784906	+	FAD-binding oxidoreductase	7	13	9	21	21	24	14	13	33	121	66	171	214	108	85	26.8135	45.1244	29.0782	22.0888	23.8566	19.5961	19.3381	22.9494	39.8733	41.4242	30.1273	62.2415	49.2284	53.3352	68.4038	4.86957	5.37094	4.94257	4.67189	4.74552	4.55699	4.55252	4.71405	5.25184	5.29288	4.96994	5.71904	5.47244	5.55522
B5M07_03755	CP020694 (Chromosome)	785119	787611	+	diguanylate cyclase	23	15	8	36	40	56	49	49	57	120	153	261	185	139	85	88.1016	52.0667	25.8473	37.8666	45.441	45.7243	67.6835	86.5018	68.8721	41.0819	69.8405	95.0002	42.5573	68.6444	68.4038	6.27827	5.74532	5.09879	5.42832	5.60727	5.61259	6.01012	6.26476	6.02834	5.50469	6.04399	6.36808	5.53929	6.02599
B5M07_03760	CP020694 (Chromosome)	787608	788354	+	hypothetical protein	10	7	15	26	16	28	30	21	44	125	70	116	146	94	26	38.3051	24.2978	48.4637	27.3481	18.1764	22.8622	41.4388	37.0722	53.1644	42.7936	31.9532	42.2223	33.5858	46.4214	20.9235	5.20052	4.7715	5.43778	4.87018	4.4859	4.69597	5.28444	5.17118	5.54242	5.32044	5.02268	5.3065	5.07279	5.40421
B5M07_03765	CP020694 (Chromosome)	788447	789235	-	glycoside hydrolase	4	1	2	38	41	31	11	4	11	169	132	139	182	164	52	15.322	3.47111	6.46183	39.9703	46.5771	25.3117	15.1942	7.06137	13.2911	57.857	60.2545	50.594	41.8672	80.9906	41.847	4.25123	3.34911	3.63066	5.15033	5.30989	4.68654	4.20685	3.60492	4.08443	5.54674	5.58954	5.40302	5.20364	5.91104
B5M07_03770	CP020694 (Chromosome)	789232	789888	-	methyltransferase	2	6	4	10	22	20	8	5	5	120	155	93	158	148	80	7.66101	20.8267	12.9237	10.5185	24.9926	16.3301	11.0504	8.82671	6.04141	41.0819	70.7534	33.8507	36.3462	73.089	64.38	3.65196	4.42552	4.01154	3.79094	4.6006	4.18533	3.84276	3.67227	3.35888	5.11739	5.70251	4.91394	4.98924	5.73781
B5M07_03775	CP020694 (Chromosome)	789882	790820	-	aldo/keto reductase	2	6	6	19	17	19	18	14	10	94	100	85	161	85	58	7.66101	20.8267	19.3855	19.9851	19.3124	15.5136	24.8633	24.7148	12.0828	32.1808	45.6474	30.9388	37.0363	41.9768	46.6755	3.70876	4.46579	4.40033	4.41721	4.385	4.17624	4.62972	4.62379	3.95981	4.89205	5.25573	4.85157	5.03812	5.16721
B5M07_03780	CP020694 (Chromosome)	790886	791503	-	glutathione S-transferase	3	6	7	13	13	19	2	2	3	55	44	55	35	24	12	11.4915	20.8267	22.6164	13.674	14.7683	15.5136	2.76259	3.53068	3.62485	18.8292	20.0848	20.0192	8.05138	11.8523	9.657	3.52763	4.07422	4.15966	3.69155	3.76534	3.81632	2.45889	2.63502	2.60459	4.01619	4.08045	4.07846	3.19014	3.55621
B5M07_03785	CP020694 (Chromosome)	791619	792692	-	BMP family ABC transporter substrate-binding protein	18	40	51	738	750	1207	443	122	506	1134	986	1113	1923	1476	559	68.9491	138.844	164.777	776.265	852.02	985.523	611.914	215.372	611.391	388.224	450.083	405.116	442.366	728.915	449.855	7.02434	7.61507	7.77241	9.35309	9.4545	9.6144	9.09642	8.02544	9.09557	8.61763	8.77156	8.6618	8.75349	9.28511
B5M07_03790	CP020694 (Chromosome)	792764	793684	-	ABC transporter permease	5	3	1	100	95	102	49	23	69	200	161	203	240	139	86	19.1525	10.4133	3.23092	105.185	107.922	83.2836	67.6835	40.6029	83.3715	68.4698	73.4923	73.8891	55.2095	68.6444	69.2085	4.80822	4.36644	3.80484	6.44022	6.46761	6.19137	5.97193	5.45583	6.1912	5.98631	6.06033	6.06625	5.76295	5.98863
B5M07_03795	CP020694 (Chromosome)	793684	794766	-	sugar ABC transporter permease	3	6	3	53	51	80	59	17	76	203	141	220	243	123	72	11.4915	20.8267	9.69275	55.748	57.9373	65.3205	81.4964	30.0108	91.8294	69.4968	64.3628	80.0768	55.8996	60.7429	57.942	4.39085	4.8224	4.25801	5.73672	5.77626	5.90157	6.13276	5.12632	6.26083	5.96798	5.88709	6.11795	5.74079	5.82658
B5M07_03800	CP020694 (Chromosome)	794809	796326	-	ABC transporter	5	4	7	140	122	132	97	29	159	402	359	384	651	320	150	19.1525	13.8844	22.6164	147.259	138.595	107.779	133.986	51.1949	192.117	137.624	163.874	139.77	149.756	158.03	120.713	5.15514	4.9284	5.26247	7.02269	6.95806	6.69417	6.92184	5.95159	7.30842	6.95192	7.13829	6.96833	7.04215	7.09923
B5M07_03805	CP020694 (Chromosome)	796323	797081	-	xanthine dehydrogenase accessory protein XdhC	15	9	7	92	94	84	43	29	66	205	216	190	275	117	72	57.4576	31.24	22.6164	96.7701	106.786	68.5865	59.3957	51.1949	79.7466	70.1815	98.5983	69.1572	63.2608	57.7798	57.942	5.88253	5.31211	5.03662	6.41994	6.52428	6.06094	5.91409	5.76603	6.21649	6.08507	6.44137	6.06985	5.9781	5.88561
B5M07_03810	CP020694 (Chromosome)	797078	799492	-	xanthine dehydrogenase molybdopterin binding subunit	31	22	16	113	114	141	72	65	129	531	449	437	629	348	232	118.746	76.3645	51.6947	118.859	129.507	115.127	99.4532	114.747	155.868	181.787	204.957	159.062	144.695	171.858	186.702	6.92748	6.49361	6.13342	6.92738	7.01542	6.89469	6.74718	6.89185	7.2077	7.37052	7.49809	7.22957	7.13058	7.31093
B5M07_03815	CP020694 (Chromosome)	799489	800880	-	xanthine dehydrogenase small subunit	16	19	13	44	37	48	35	23	35	214	124	184	299	140	122	61.2881	65.9511	42.0019	46.2814	42.033	39.1923	48.3453	40.6029	42.2899	73.2627	56.6028	66.9733	68.7818	69.1383	98.1795	5.89365	5.96766	5.52708	5.61391	5.521	5.45359	5.65738	5.49052	5.52705	6.08037	5.81517	5.98793	6.0156	6.02046
B5M07_03820	CP020694 (Chromosome)	801080	804616	+	DNA polymerase III subunit alpha	15	21	18	106	89	103	56	67	103	303	243	303	388	217	145	57.4576	72.8933	58.1565	111.496	101.106	84.1001	77.3525	118.278	124.453	103.732	110.923	110.288	89.2553	107.164	116.689	6.07557	6.30188	6.08444	6.73131	6.62985	6.44121	6.35737	6.79218	6.84618	6.65676	6.72645	6.72053	6.50165	6.6905
B5M07_03825	CP020694 (Chromosome)	804712	805278	+	hypothetical protein	7	5	0	11	17	36	21	11	28	41	24	35	39	12	13	26.8135	17.3556	0	11.5703	19.3124	29.3942	29.0072	19.4188	33.8319	14.0363	10.9554	12.7395	8.97154	5.92614	10.4618	4.43135	4.01332	2.32355	3.64005	4.13112	4.56446	4.54295	4.13157	4.70697	3.82024	3.5834	3.72625	3.39328	3.03843
B5M07_03830	CP020694 (Chromosome)	805310	805504	-	SlyX protein	0	0	0	0	0	0	0	0	0	0	0	1	0	0	0	0	0	0	0	0	0	0	0	0	0	0	0.363986	0	0	0	-2.19869	-2.20149	-2.20353	-2.23545	-2.23326	-2.24266	-2.2277	-2.22073	-2.23151	-2.26207	-2.2592	-2.21265	-2.26232	-2.25696
B5M07_03835	CP020694 (Chromosome)	805671	807167	+	histidine--tRNA ligase	6	3	5	12	21	29	5	16	16	95	30	56	162	56	35	22.983	10.4133	16.1546	12.6222	23.8566	23.6787	6.90647	28.2455	19.3325	32.5231	13.6942	20.3832	37.2664	27.6553	28.1663	4.45556	3.78254	4.13544	3.89466	4.49999	4.49367	3.40896	4.66586	4.29376	4.82062	3.96063	4.3452	4.96385	4.65235
B5M07_03840	CP020694 (Chromosome)	807167	808249	+	ATP phosphoribosyltransferase regulatory subunit	0	0	2	4	2	11	2	9	2	22	13	14	47	16	14	0	0	6.46183	4.2074	2.27205	8.98157	2.76259	15.8881	2.41656	7.53168	5.93416	5.0958	10.8119	7.90152	11.2665	1.51619	1.47534	2.55775	2.22446	1.80508	2.88602	1.94124	3.41695	1.84774	2.73123	2.51044	2.37546	3.08314	2.773
B5M07_03845	CP020694 (Chromosome)	808246	808935	+	ATP phosphoribosyltransferase catalytic subunit HisG	1	0	2	15	13	18	4	11	8	21	10	27	16	14	11	3.83051	0	6.46183	15.7777	14.7683	14.6971	5.52518	19.4188	9.66626	7.18933	4.56474	9.82761	3.68063	6.91383	8.85225	2.5039	1.82211	2.8176	3.63141	3.56334	3.56551	2.67358	3.82551	3.1544	2.88546	2.49024	3.17914	2.29974	2.85081
B5M07_03850	CP020694 (Chromosome)	809147	809962	+	ABC transporter ATP-binding protein	124	114	66	511	429	666	593	246	862	39	45	35	41	11	4	474.983	395.707	213.24	537.495	487.355	543.793	819.108	434.274	1041.54	13.3516	20.5413	12.7395	9.43162	5.43229	3.219	8.41244	8.20819	7.5313	8.55719	8.4463	8.57081	9.03871	8.31541	9.31764	4.93876	5.27937	4.90552	4.68289	4.3759
B5M07_03855	CP020694 (Chromosome)	810036	811040	+	branched-chain amino acid ABC transporter permease	10	6	12	168	102	294	128	37	153	10	7	3	23	5	2	38.3051	20.8267	38.771	176.711	115.875	240.053	176.806	65.3177	184.867	3.42349	3.19532	1.09196	5.29091	2.46922	1.6095	5.09395	4.5049	5.10942	6.7998	6.31723	7.15658	6.79806	5.67419	6.85076	2.92301	2.89887	2.29429	3.23434	2.74667
B5M07_03860	CP020694 (Chromosome)	811037	812107	+	branched-chain amino acid ABC transporter permease	4	9	10	167	138	328	151	45	168	19	4	2	25	3	2	15.322	31.24	32.3092	175.659	156.772	267.814	208.576	79.4404	202.991	6.50463	1.8259	0.727971	5.75099	1.48153	1.6095	4.24696	4.8952	4.9293	6.79738	6.66597	7.28896	6.99385	5.89378	6.96351	3.41899	2.57282	2.14954	3.30593	2.48431
B5M07_03865	CP020694 (Chromosome)	812147	813349	+	amino acid ABC transporter substrate-binding protein	5	5	3	281	163	497	212	44	260	16	3	8	14	8	4	19.1525	17.3556	9.69275	295.57	185.172	405.803	292.835	77.6751	314.153	5.47758	1.36942	2.91188	3.22055	3.95076	3.219	4.49738	4.40856	3.9491	7.43969	6.89588	7.81419	7.42704	5.91205	7.51043	3.3429	2.51825	2.89382	2.93016	3.12287
B5M07_03870	CP020694 (Chromosome)	813402	814196	+	ABC transporter ATP-binding protein	5	4	1	117	75	192	98	39	106	4	2	2	4	1	1	19.1525	13.8844	3.23092	123.066	85.202	156.769	135.367	68.8483	128.078	1.3694	0.912948	0.727971	0.920158	0.493845	0.80475	4.11294	3.81467	2.81848	6.19171	5.76569	6.47726	6.29912	5.51334	6.23641	1.92236	1.77784	1.63535	1.65452	1.59258
B5M07_03875	CP020694 (Chromosome)	814208	816028	+	AMP-dependent synthetase	6	7	6	350	231	591	348	75	327	31	9	2	23	12	7	22.983	24.2978	19.3855	368.147	262.422	482.555	480.691	132.401	395.108	10.6128	4.10826	0.727971	5.29091	5.92614	5.63325	4.83747	4.88231	4.6839	7.79488	7.40196	8.11308	8.10653	6.62288	7.87687	4.08577	3.37253	2.55235	3.51467	3.63252
B5M07_03880	CP020694 (Chromosome)	816032	816463	-	lysophospholipase	0	3	2	1	8	12	1	2	3	15	4	1	14	9	3	0	10.4133	6.46183	1.05185	9.08821	9.79807	1.38129	3.53068	3.62485	5.13523	1.8259	0.363986	3.22055	4.4446	2.41425	1.05301	2.63785	2.21738	1.06393	2.61449	2.70422	1.22116	1.78289	1.8052	2.11576	1.29211	0.502772	1.71251	1.98327
B5M07_03885	CP020694 (Chromosome)	816665	818944	+	ribonucleoside-diphosphate reductase, adenosylcobalamin-dependent	78	65	112	135	115	124	145	123	160	223	164	225	202	126	59	298.779	225.622	361.863	142	130.643	101.247	200.288	217.137	193.325	76.3438	74.8617	81.8967	46.468	62.2245	47.4803	7.89214	7.58778	8.10461	7.10072	7.01423	6.75348	7.46323	7.5492	7.4257	6.47046	6.45156	6.54002	5.99409	6.27194
B5M07_03890	CP020694 (Chromosome)	819274	820323	+	peptidase	0	0	0	12	2	4	0	3	0	18	2	6	11	2	1	0	0	0	12.6222	2.27205	3.26602	0	5.29603	0	6.16228	0.912948	2.18391	2.53043	0.98769	0.80475	0.49132	0.449367	0.418831	2.56093	1.03292	1.31547	0.120094	1.66376	0.0765055	1.90829	0.466942	1.02016	1.13868	0.512651
B5M07_03900	CP020694 (Chromosome)	820824	821675	+	hypothetical protein	0	0	4	7	10	5	8	2	3	7	2	18	42	6	5	0	0	12.9237	7.36294	11.3603	4.08253	11.0504	3.53068	3.62485	2.39644	0.912948	6.55174	9.66166	2.96307	4.02375	1.33743	1.2985	3.05089	2.59079	3.00247	2.08398	2.96569	1.98758	1.99672	1.65382	1.08569	2.50201	2.87835	1.82379
B5M07_03905	CP020694 (Chromosome)	821962	822606	-	hypothetical protein	3	5	7	5	2	10	8	5	4	55	31	35	67	57	16	11.4915	17.3556	22.6164	5.25925	2.27205	8.16506	11.0504	8.82671	4.83313	18.8292	14.1507	12.7395	15.4126	28.1492	12.876	3.51886	3.8899	4.15214	2.8498	2.31271	3.20681	3.48347	3.28785	2.79494	4.00958	3.72193	3.61952	3.80879	4.42404
B5M07_03910	CP020694 (Chromosome)	822593	825838	-	hypothetical protein	11	23	15	29	37	41	29	11	35	108	111	69	350	128	120	42.1356	79.8356	48.4637	30.5036	42.033	33.4767	40.0576	19.4188	42.2899	36.9737	50.6686	25.115	80.5138	63.2121	96.57	5.42741	6.07677	5.56483	5.10737	5.42282	5.19645	5.37511	4.7019	5.42899	5.29309	5.61284	4.91507	6.09935	5.84246
B5M07_03915	CP020694 (Chromosome)	825955	827187	-	hypothetical protein	3	7	4	15	6	10	9	7	14	76	33	20	97	37	30	11.4915	24.2978	12.9237	15.7777	6.81616	8.16506	12.4317	12.3574	16.9159	26.0185	15.0636	7.27971	22.3138	18.2723	24.1425	3.66782	4.34495	3.76176	3.94215	3.19944	3.33754	3.71883	3.71565	4.00897	4.44959	3.89829	3.22245	4.29289	4.0887
B5M07_03920	CP020694 (Chromosome)	827885	828478	-	hypothetical protein	1	0	0	0	1	1	2	0	3	55	10	15	55	22	5	3.83051	0	0	0	1.13603	0.816506	2.76259	0	3.62485	18.8292	4.56474	5.45978	12.6522	10.8646	4.02375	1.79829	0.975606	0.949131	0.505281	1.07114	0.880368	1.58485	0.714442	1.78364	3.39938	1.99208	2.1582	2.99003	2.81995
B5M07_03925	CP020694 (Chromosome)	828590	828928	-	hypothetical protein	0	1	9	0	2	3	0	3	1	18	8	9	10	17	2	0	3.47111	29.0782	0	2.27205	2.44952	0	5.29603	1.20828	6.16228	3.65179	3.27587	2.30039	8.39536	1.6095	0.931065	1.67697	3.71133	0.42876	1.39265	1.43593	0.538516	2.03212	1.04381	2.23521	1.75393	1.66237	1.36925	2.52759
B5M07_03930	CP020694 (Chromosome)	829518	831020	-	hypothetical protein	9	7	4	6	6	5	15	15	10	15	32	27	61	39	23	34.4745	24.2978	12.9237	6.31109	6.81616	4.08253	20.7194	26.4801	12.0828	5.13523	14.6072	9.82761	14.0324	19.2599	18.5093	4.65186	4.29651	3.70507	3.07538	3.14076	2.73036	4.16171	4.40687	3.64081	2.86786	3.82215	3.44197	3.78332	4.09766
B5M07_03935	CP020694 (Chromosome)	831024	831470	-	hypothetical protein	0	0	2	0	0	2	0	0	0	2	0	1	3	1	3	0	0	6.46183	0	0	1.63301	0	0	0	0.684698	0	0.363986	0.690118	0.493845	2.41425	-0.590809	-0.623989	0.697654	-1.02609	-1.00016	-0.14254	-0.934321	-0.8517	-0.979391	-0.594256	-1.18362	-0.840222	-0.589424	-0.727515
B5M07_03940	CP020694 (Chromosome)	831498	832205	-	hypothetical protein	11	0	2	0	1	0	0	2	6	14	3	1	16	1	2	42.1356	0	6.46183	0	1.13603	0	0	3.53068	7.24969	4.79288	1.36942	0.363986	3.68063	0.493845	1.6095	3.99953	0.53235	1.89924	0.0507769	0.703152	-0.0532789	0.16105	1.45284	2.15932	1.8189	0.753664	0.0395072	1.57524	0.210444
B5M07_03945	CP020694 (Chromosome)	832286	833944	+	hypothetical protein	4	4	9	2	7	1	5	9	7	24	13	12	21	22	6	15.322	13.8844	29.0782	2.1037	7.95218	0.816506	6.90647	15.8881	8.45797	8.21637	5.93416	4.36783	4.83083	10.8646	4.8285	3.52158	3.43443	4.1976	1.9654	2.95372	1.49772	2.8299	3.60388	3.00913	2.98767	2.68896	2.42062	2.50153	3.25478
B5M07_03950	CP020694 (Chromosome)	833941	834894	+	hypothetical protein	5	2	4	30	26	41	28	8	31	41	23	16	43	28	9	19.1525	6.94222	12.9237	31.5555	29.5367	33.4767	38.6763	14.1227	37.4567	14.0363	10.4989	5.82377	9.8917	13.8277	7.24275	4.17209	3.36141	3.82299	4.69163	4.62177	4.75651	4.90231	3.89264	4.87045	3.87988	3.60627	3.08484	3.54619	3.86628
B5M07_03955	CP020694 (Chromosome)	835174	836106	-	carboxyvinyl-carboxyphosphonate phosphorylmutase	11	6	1	6	3	11	5	14	6	57	37	40	55	27	25	42.1356	20.8267	3.23092	6.31109	3.40808	8.98157	6.90647	24.7148	7.24969	19.5139	16.8895	14.5594	12.6522	13.3338	20.1188	4.83812	4.11223	2.74227	3.03977	2.5992	3.33492	3.12421	4.30747	3.15854	4.08529	3.93785	3.79069	3.65309	3.70384
B5M07_03960	CP020694 (Chromosome)	836103	836780	-	hypothetical protein	2	7	8	6	9	0	7	0	14	34	24	23	43	22	10	7.66101	24.2978	25.8473	6.31109	10.2242	0	9.66906	0	16.9159	11.6399	10.9554	8.37167	9.8917	10.8646	8.0475	3.01338	4.07556	4.146	2.83102	3.26191	1.21458	3.20851	1.57745	3.75274	3.39514	3.33439	3.07729	3.23724	3.32589
B5M07_03965	CP020694 (Chromosome)	836918	839641	+	aconitate hydratase 1	2	14	1	14	33	15	13	14	16	72	38	60	74	41	24	7.66101	48.5956	3.23092	14.7259	37.4889	12.2476	17.9568	24.7148	19.3325	24.6491	17.346	21.8391	17.0229	20.2476	19.314	3.5194	5.17345	3.03451	3.99011	4.92384	3.81683	4.17915	4.49024	4.25047	4.49648	4.1445	4.37362	4.12555	4.29735
B5M07_03970	CP020694 (Chromosome)	839638	840042	+	hypothetical protein	0	2	1	1	1	3	9	2	1	9	7	8	17	5	1	0	6.94222	3.23092	1.05185	1.13603	2.44952	12.4317	3.53068	1.20828	3.08114	3.19532	2.91188	3.91067	2.46922	0.80475	0.841088	2.09305	1.53542	0.898442	0.940886	1.36274	2.76383	1.61633	0.975103	1.53773	1.56526	1.4921	1.74023	1.3651
B5M07_03975	CP020694 (Chromosome)	840039	841403	+	dihydroorotase	7	1	6	19	21	19	15	7	28	70	38	59	94	52	32	26.8135	3.47111	19.3855	19.9851	23.8566	15.5136	20.7194	12.3574	33.8319	23.9644	17.346	21.4751	21.6237	25.6799	25.752	4.59108	3.13428	4.28642	4.31509	4.48943	4.07111	4.34996	3.87574	4.84423	4.49733	4.17625	4.38693	4.39413	4.56668
B5M07_03980	CP020694 (Chromosome)	841425	842135	+	hydrolase	1	4	4	18	5	19	6	4	9	40	36	23	67	26	16	3.83051	13.8844	12.9237	18.9333	5.68013	15.5136	8.28777	7.06137	10.8745	13.694	16.4331	8.37167	15.4126	12.84	12.876	2.78594	3.67336	3.61091	3.99487	2.90731	3.79986	3.22121	3.09725	3.45989	3.68162	3.86098	3.21456	3.79958	3.61791
B5M07_03985	CP020694 (Chromosome)	842328	842651	+	hypothetical protein	1	0	0	0	0	0	0	2	2	3	1	1	2	2	3	3.83051	0	0	0	0	0	0	3.53068	2.41656	1.02705	0.456474	0.363986	0.460079	0.98769	2.41425	0.367448	-0.381634	-0.407231	-0.790931	-0.775174	-0.842343	-0.710554	0.545187	0.31131	-0.170027	-0.536073	-0.621579	-0.557513	-0.19648
B5M07_03990	CP020694 (Chromosome)	842866	843159	+	transposase	0	0	0	0	0	0	0	0	0	0	0	0	0	0	0	0	0	0	0	0	0	0	0	0	0	0	0	0	0	0	0	0	0	0	0	0	0	0	0	0	0	0	0	0
B5M07_03995	CP020694 (Chromosome)	843168	844061	+	hypothetical protein	0	0	0	0	0	0	0	0	0	0	0	0	0	0	0	0	0	0	0	0	0	0	0	0	0	0	0	0	0	0	0	0	0	0	0	0	0	0	0	0	0	0	0	0
B5M07_04000	CP020694 (Chromosome)	844058	844399	-	hypothetical protein	0	0	2	2	1	0	0	0	1	0	0	0	0	0	0	0	0	6.46183	2.1037	1.13603	0	0	0	1.20828	0	0	0	0	0	0	-1.08123	-1.11273	0.143047	-0.402194	-0.830436	-1.57536	-1.40729	-1.32887	-0.810724	-1.74902	-1.70708	-1.74037	-1.80089	-1.69509
B5M07_04005	CP020694 (Chromosome)	844514	845611	-	ABC transporter ATP-binding protein	8	6	9	24	16	25	17	11	30	21	11	10	17	5	2	30.644	20.8267	29.0782	25.2444	18.1764	20.4126	23.482	19.4188	36.2485	7.18933	5.02121	3.63986	3.91067	2.46922	1.6095	4.48818	4.09874	4.44289	4.33052	3.99202	4.11405	4.24999	4.05075	4.71258	3.10427	2.79824	2.53138	2.57289	2.27204
B5M07_04010	CP020694 (Chromosome)	845616	846515	-	sugar ABC transporter permease	2	7	9	14	6	8	16	7	12	13	7	11	12	9	4	7.66101	24.2978	29.0782	14.7259	6.81616	6.53205	22.1007	12.3574	14.4994	4.45054	3.19532	4.00384	2.76047	4.4446	3.219	2.98423	4.05488	4.25188	3.59634	2.87327	2.83224	4.00527	3.41155	3.57772	2.48749	2.22984	2.40058	2.09103	2.49464
B5M07_04015	CP020694 (Chromosome)	846508	847380	-	ABC transporter permease	3	3	6	2	9	2	2	4	5	5	4	1	2	1	2	11.4915	10.4133	19.3855	2.1037	10.2242	1.63301	2.76259	7.06137	6.04141	1.71174	1.8259	0.363986	0.460079	0.493845	1.6095	2.70403	2.62232	3.29517	1.3723	2.72599	1.19631	1.5659	2.32962	2.20996	1.17992	1.23707	0.397046	0.402449	0.559715
B5M07_04020	CP020694 (Chromosome)	847436	848680	-	sugar ABC transporter substrate-binding protein	2	5	9	42	38	36	37	12	33	17	8	6	16	2	8	7.66101	17.3556	29.0782	44.1777	43.169	29.3942	51.1079	21.1841	39.8733	5.81993	3.65179	2.18391	3.68063	0.98769	6.438	3.28453	3.96355	4.48258	4.96745	4.94074	4.53134	5.1226	4.17667	4.85284	2.95085	2.57964	2.19844	2.55679	1.81606
B5M07_04025	CP020694 (Chromosome)	848906	849643	+	DNA-binding response regulator	2	0	10	0	13	1	4	4	11	21	10	16	37	12	9	7.66101	0	32.3092	0	14.7683	0.816506	5.52518	7.06137	13.2911	7.18933	4.56474	5.82377	8.51146	5.92614	7.24275	2.77236	1.57573	4.21003	1.03061	3.44088	1.33584	2.51826	2.72442	3.33193	2.75494	2.34519	2.55962	2.91828	2.57565
B5M07_04030	CP020694 (Chromosome)	849640	851088	+	two-component sensor histidine kinase	4	5	3	9	6	8	9	4	17	46	27	20	68	47	9	15.322	17.3556	9.69275	9.46664	6.81616	6.53205	12.4317	7.06137	20.5408	15.748	12.3248	7.27971	15.6427	23.2107	7.24275	3.77756	3.89639	3.38637	3.3495	3.06918	3.02379	3.59921	3.11455	4.09009	3.83455	3.59339	3.10317	3.82899	4.22597
B5M07_04035	CP020694 (Chromosome)	851705	852694	+	C4-dicarboxylate ABC transporter substrate-binding protein	2	1	0	1	12	9	3	0	7	35	18	35	739	1827	952	7.66101	3.47111	0	1.05185	13.6323	7.34855	4.14388	0	8.45797	11.9822	8.21653	12.7395	169.999	902.255	766.122	3.43992	2.97682	2.40474	2.1601	3.86764	3.29212	2.89201	2.0674	3.43065	3.73318	3.37586	3.79398	6.63971	8.64397
B5M07_04040	CP020694 (Chromosome)	852709	853065	+	cupin	0	0	0	0	0	0	0	0	1	1	0	1	69	86	58	0	0	0	0	0	0	0	0	1.20828	0.342349	0	0.363986	15.8727	42.4707	46.6755	0.321386	0.275252	0.241672	-0.24211	-0.209289	-0.3523	-0.127676	-0.0293555	0.524762	-0.264706	-0.612942	-0.227452	3.0474	4.16864
B5M07_04045	CP020694 (Chromosome)	853062	853535	+	C4-dicarboxylate ABC transporter permease	0	0	1	0	3	1	0	0	0	6	4	18	84	207	74	0	0	3.23092	0	3.40808	0.816506	0	0	0	2.05409	1.8259	6.55174	19.3233	102.226	59.5515	1.09889	1.05756	1.79645	0.499067	1.81652	0.887989	0.633174	0.751506	0.56758	1.36849	1.28942	2.44352	3.60859	5.52605
B5M07_04050	CP020694 (Chromosome)	853532	854815	+	C4-dicarboxylate ABC transporter permease	2	2	5	10	8	12	2	1	7	34	23	48	351	938	507	7.66101	6.94222	16.1546	10.5185	9.08821	9.79807	2.76259	1.76534	8.45797	11.6399	10.4989	17.4713	80.7438	463.226	408.008	3.51936	3.44169	4.09776	3.68376	3.55686	3.61298	2.73889	2.60618	3.49794	3.76161	3.66619	4.16255	5.80995	7.85035
B5M07_04055	CP020694 (Chromosome)	854844	856088	+	Zn-dependent hydrolase	0	2	5	6	3	5	3	0	3	43	22	36	325	545	219	0	6.94222	16.1546	6.31109	3.40808	4.08253	4.14388	0	3.62485	14.721	10.0424	13.1035	74.7628	269.145	176.24	2.26043	3.18363	3.88894	3.02845	2.56994	2.66445	2.72637	1.84287	2.61898	3.81576	3.43473	3.69759	5.58526	7.0791
B5M07_04060	CP020694 (Chromosome)	856085	857032	+	ornithine cyclodeaminase	0	0	0	0	0	0	0	2	1	18	8	15	103	166	71	0	0	0	0	0	0	0	3.53068	1.20828	6.16228	3.65179	5.45978	23.6941	81.9782	57.1373	1.14361	1.10212	1.07135	0.544951	0.582762	0.420119	0.678162	1.87612	1.18224	2.39884	1.89518	2.2779	3.84347	5.26631
B5M07_04065	CP020694 (Chromosome)	857014	857946	-	LysR family transcriptional regulator	0	3	5	2	11	4	14	3	13	30	10	48	107	95	82	0	10.4133	16.1546	2.1037	12.4963	3.26602	19.3381	5.29603	15.7077	10.2705	4.56474	17.4713	24.6142	46.9153	65.9895	2.2295	3.45722	3.84704	2.26342	3.61647	2.49357	4.04405	2.9024	3.83805	3.4276	2.70833	3.95388	4.31137	5.00184
B5M07_04070	CP020694 (Chromosome)	858146	858457	+	hypothetical protein	0	0	0	0	0	0	0	0	0	0	4	1	0	5	0	0	0	0	0	0	0	0	0	0	0	1.8259	0.363986	0	2.46922	0	-1.16771	-1.18908	-1.20463	-1.44799	-1.4313	-1.50292	-1.38891	-1.3357	-1.41793	-1.5792	-0.686955	-1.31351	-1.59509	-0.506881
B5M07_04075	CP020694 (Chromosome)	858566	859180	+	dimethylmenaquinone methyltransferase	2	0	0	0	0	0	1	0	4	6	11	13	151	313	243	7.66101	0	0	0	0	0	1.38129	0	4.83313	2.05409	5.02121	4.73181	34.736	154.573	195.554	2.68966	1.38579	1.35171	0.77769	0.818532	0.643083	1.48097	1.04975	2.3154	1.55083	2.34652	2.289	4.42443	6.17453
B5M07_04080	CP020694 (Chromosome)	859235	860767	+	ABC transporter substrate-binding protein	4	0	0	1	4	6	1	0	9	29	44	84	883	3004	1355	15.322	0	0	1.05185	4.5441	4.89904	1.38129	0	10.8745	9.92812	20.0848	30.5748	203.125	1483.51	1090.44	4.05832	2.54518	2.50469	2.24475	3.00179	3.02436	2.42481	2.16356	3.71704	3.60771	4.31011	4.75345	6.90567	9.66164
B5M07_04085	CP020694 (Chromosome)	860840	861760	+	ABC transporter permease	0	4	1	2	0	0	1	0	0	6	11	40	261	457	299	0	13.8844	3.23092	2.1037	0	0	1.38129	0	0	2.05409	5.02121	14.5594	60.0403	225.687	240.62	1.68471	3.4181	2.26356	1.84126	1.04754	0.869176	1.67524	1.285	1.0809	1.70124	2.47621	3.55428	5.14701	6.71519
B5M07_04090	CP020694 (Chromosome)	861760	862632	+	peptide ABC transporter permease	3	0	0	0	0	0	6	0	0	8	13	20	106	337	200	11.4915	0	0	0	0	0	8.28777	0	0	2.73879	5.93416	7.27971	24.3842	166.426	160.95	3.09386	1.43127	1.39698	0.822251	0.862989	0.688144	2.84072	1.09406	0.895574	1.8157	2.53	2.73489	4.03664	6.2721
B5M07_04095	CP020694 (Chromosome)	862638	863612	+	ABC transporter ATP-binding protein	0	0	0	0	0	0	0	0	1	2	6	9	86	134	84	0	0	0	0	0	0	0	0	1.20828	0.684698	2.73884	3.27587	19.7834	66.1752	67.599	0.777236	0.730264	0.696421	0.202119	0.238589	0.0807634	0.329995	0.441638	0.89804	0.404061	1.43699	1.60313	3.50709	4.89593
B5M07_04100	CP020694 (Chromosome)	863582	864553	+	ABC transporter ATP-binding protein	0	3	6	2	6	1	1	5	6	11	7	11	139	286	213	0	10.4133	19.3855	2.1037	6.81616	0.816506	1.38129	8.82671	7.24969	3.76584	3.19532	4.00384	31.9755	141.24	171.412	1.97397	3.30804	3.90878	2.05576	2.92653	1.56689	1.91324	3.16388	2.98258	2.3753	2.25313	2.4296	4.51632	6.21241
B5M07_04105	CP020694 (Chromosome)	864714	866057	-	guanine deaminase	4	15	8	5	17	12	12	6	13	11	23	25	30	13	36	15.322	52.0667	25.8473	5.25925	19.3124	9.79807	16.5755	10.5921	15.7077	3.76584	10.4989	9.09964	6.90118	6.41998	28.971	3.83262	5.08898	4.34455	2.90797	4.07678	3.4249	3.92264	3.5039	3.87135	2.59313	3.48535	3.35019	3.09374	3.04125
B5M07_04110	CP020694 (Chromosome)	866117	867718	-	xanthine/uracil/vitamin C permease	10	5	0	4	12	12	2	6	2	9	8	13	14	12	0	38.3051	17.3556	0	4.2074	13.6323	9.79807	2.76259	10.5921	2.41656	3.08114	3.65179	4.73181	3.22055	5.92614	0	4.32977	3.46725	1.41495	2.21342	3.29917	2.9782	1.92151	3.02548	1.82481	1.93554	2.08126	2.30274	1.96506	2.50659
B5M07_04115	CP020694 (Chromosome)	867760	868641	-	xanthine dehydrogenase accessory protein XdhC	0	5	3	7	1	0	1	2	1	11	10	4	2	0	2	0	17.3556	9.69275	7.36294	1.13603	0	1.38129	3.53068	1.20828	3.76584	4.56474	1.45594	0.460079	0	1.6095	0.630745	2.90346	2.29353	2.16815	0.754073	0.0461612	0.866685	1.46837	0.789477	1.58987	1.75685	0.833508	0.164166	-0.133659
B5M07_04120	CP020694 (Chromosome)	868645	870963	-	xanthine dehydrogenase molybdopterin binding subunit	3	7	3	1	0	0	3	7	4	10	2	7	24	13	12	11.4915	24.2978	9.69275	1.05185	0	0	4.14388	12.3574	4.83313	3.42349	0.912948	2.5479	5.52095	6.41998	9.657	2.90774	3.71071	2.76609	1.23186	0.768819	0.624686	2.07647	3.06035	2.20204	1.90818	1.02815	1.66907	2.33442	2.46932
B5M07_04125	CP020694 (Chromosome)	870981	872444	-	xanthine dehydrogenase small subunit	2	0	0	0	0	0	0	0	0	1	1	2	5	0	4	7.66101	0	0	0	0	0	0	0	0	0.342349	0.456474	0.727971	1.1502	0	3.219	0.694058	-0.713241	-0.737864	-1.1232	-1.09676	-1.19841	-1.02964	-0.945403	-1.07559	-0.956185	-0.846358	-0.641109	-0.36661	-1.28981
B5M07_04130	CP020694 (Chromosome)	872602	873504	+	LysR family transcriptional regulator	17	24	20	9	12	14	16	40	35	68	61	77	61	28	16	65.1186	83.3067	64.6183	9.46664	13.6323	11.4311	22.1007	70.6137	42.2899	23.2797	27.8449	28.0269	14.0324	13.8277	12.876	5.6424	5.91367	5.63891	3.78541	4.10043	3.93658	4.55114	5.74703	5.20437	4.59833	4.77806	4.78475	4.10701	4.09917
B5M07_04135	CP020694 (Chromosome)	873649	874881	-	cysteine desulfurase	1	3	0	13	14	23	6	3	11	40	20	20	84	38	48	3.83051	10.4133	0	13.674	15.9044	18.7796	8.28777	5.29603	13.2911	13.694	9.12948	7.27971	19.3233	18.7661	38.628	2.78432	3.42906	2.11665	3.67827	3.82478	3.99487	3.22169	2.88031	3.65001	3.68469	3.29604	3.08741	4.03258	3.99878
B5M07_04140	CP020694 (Chromosome)	874982	875881	+	LysR family transcriptional regulator	4	9	6	14	9	8	8	12	7	64	32	42	108	28	25	15.322	31.24	19.3855	14.7259	10.2242	6.53205	11.0504	21.1841	8.45797	21.9103	14.6072	15.2874	24.8443	13.8277	20.1188	3.94452	4.62818	4.16004	3.90577	3.57243	3.18497	3.64467	4.25503	3.41143	4.30012	3.89689	3.94105	4.42975	3.84414
B5M07_04145	CP020694 (Chromosome)	875906	876259	-	hydroxyisourate hydrolase	0	0	1	0	2	1	0	1	1	7	1	2	14	3	1	0	0	3.23092	0	2.27205	0.816506	0	1.76534	1.20828	2.39644	0.456474	0.727971	3.22055	1.48153	0.80475	0.0127758	-0.0240016	0.695298	-0.407094	0.583005	0.0404348	-0.345246	0.400184	0.21927	0.675548	-0.201454	-0.0336179	0.911902	0.342512
B5M07_04150	CP020694 (Chromosome)	876410	877822	+	OHCU decarboxylase	12	15	7	11	9	26	14	16	24	48	40	50	119	91	54	45.9661	52.0667	22.6164	11.5703	10.2242	21.2292	19.3381	28.2455	28.9988	16.4327	18.259	18.1993	27.3747	44.9399	43.4565	5.23988	5.37297	4.54319	3.92075	3.81894	4.47684	4.3901	4.75743	4.78523	4.22644	4.32875	4.32481	4.72954	5.2414
B5M07_04155	CP020694 (Chromosome)	877819	878301	+	Ureidoglycolate hydrolase	1	4	0	5	1	10	8	0	3	25	3	12	21	28	13	3.83051	13.8844	0	5.25925	1.13603	8.16506	11.0504	0	3.62485	8.55872	1.36942	4.36783	4.83083	13.8277	10.4618	2.13163	3.17099	1.34744	2.34537	1.3843	2.74501	3.0179	1.08993	2.05137	2.80436	1.34766	2.18625	2.27411	3.27564
B5M07_04160	CP020694 (Chromosome)	878359	879783	+	uracil permease	10	8	0	38	43	70	28	15	33	34	54	50	86	61	55	38.3051	27.7689	0	39.9703	48.8491	57.1554	38.6763	26.4801	39.8733	11.6399	24.6496	18.1993	19.7834	30.1245	44.2613	5.09636	4.78238	2.86852	5.15395	5.36327	5.53255	5.1182	4.73663	5.15058	3.94948	4.66457	4.36716	4.44679	4.86612
B5M07_04165	CP020694 (Chromosome)	880157	881158	-	glyceraldehyde-3-phosphate dehydrogenase	3	1	0	4	4	2	4	0	3	18	6	14	70	33	8	11.4915	3.47111	0	4.2074	4.5441	1.63301	5.52518	0	3.62485	6.16228	2.73884	5.0958	16.1028	16.2969	6.438	2.95763	2.04987	1.32368	2.14647	2.2085	1.49151	2.36809	1.06828	2.03476	2.47942	1.79584	2.30692	3.42767	3.42946
B5M07_04170	CP020694 (Chromosome)	881161	881667	-	transporter	3	1	2	0	0	0	0	3	0	12	8	12	35	14	11	11.4915	3.47111	6.46183	0	0	0	0	5.29603	0	4.10819	3.65179	4.36783	8.05138	6.91383	8.85225	2.63928	1.65997	2.12734	0.424595	0.454925	0.325494	0.532002	2.01458	0.479243	1.84568	1.74029	1.89938	2.4817	2.31859
B5M07_04175	CP020694 (Chromosome)	881734	882699	-	ornithine cyclodeaminase	5	3	1	8	7	3	1	1	4	12	13	11	19	18	20	19.1525	10.4133	3.23092	8.41479	7.95218	2.44952	1.38129	1.76534	4.83313	4.10819	5.93416	4.00384	4.37075	8.88921	16.095	3.5846	3.0031	2.15888	2.86059	2.80687	1.86847	1.63347	1.7819	2.37879	2.22798	2.54956	2.20712	2.27771	2.92446
B5M07_04180	CP020694 (Chromosome)	882869	884032	-	alanine racemase	0	0	5	10	10	7	3	4	8	15	17	33	34	12	17	0	0	16.1546	10.5185	11.3603	5.71554	4.14388	7.06137	9.66626	5.13523	7.76005	12.0115	7.82134	5.92614	13.6808	1.77861	1.73496	3.54968	3.18249	3.25445	2.63469	2.39724	2.81811	3.10053	2.53388	2.90499	3.32497	2.91367	2.66165
B5M07_04185	CP020694 (Chromosome)	884069	885040	-	serine dehydratase	0	2	0	1	4	0	0	3	3	2	3	8	15	11	8	0	6.94222	0	1.05185	4.5441	0	0	5.29603	3.62485	0.684698	1.36942	2.91188	3.45059	5.43229	6.438	0.66263	1.94151	0.588989	0.744616	1.69985	0.1184	0.296567	1.7969	1.51074	0.443915	0.830782	1.36695	1.51234	1.89574
B5M07_04195	CP020694 (Chromosome)	886401	887249	+	IclR family transcriptional regulator	2	7	5	2	3	8	9	9	13	34	39	66	69	55	19	7.66101	24.2978	16.1546	2.1037	3.40808	6.53205	12.4317	15.8881	15.7077	11.6399	17.8025	24.023	15.8727	27.1615	15.2903	3.27051	4.27182	3.87899	2.32533	2.61049	3.06761	3.64318	3.87337	3.8662	3.57917	3.99664	4.30429	3.8836	4.43032
B5M07_04200	CP020694 (Chromosome)	887230	888099	-	(S)-ureidoglycine aminohydrolase	0	1	1	12	6	18	1	8	3	18	11	42	28	19	14	0	3.47111	3.23092	12.6222	6.81616	14.6971	1.38129	14.1227	3.62485	6.16228	5.02121	15.2874	6.4411	9.38305	11.2665	1.72205	2.32073	2.27508	3.32863	2.75404	3.48638	1.74217	3.42137	2.25651	2.66354	2.48478	3.53892	2.70338	3.05324
B5M07_04205	CP020694 (Chromosome)	888364	888999	-	maleylacetoacetate isomerase	1	5	2	6	13	8	11	6	1	7	12	1	11	2	0	3.83051	17.3556	6.46183	6.31109	14.7683	6.53205	15.1942	10.5921	1.20828	2.39644	5.47769	0.363986	2.53043	0.98769	0	2.0209	3.33239	2.39739	2.42846	3.26116	2.46663	3.2801	2.89529	1.30451	1.61073	2.31323	0.621742	1.64484	1.06836
B5M07_04210	CP020694 (Chromosome)	889004	889243	-	hypothetical protein	0	0	0	0	0	0	0	0	0	0	0	0	0	0	0	0	0	0	0	0	0	0	0	0	0	0	0	0	0	0	0	0	0	0	0	0	0	0	0	0	0	0	0	0
B5M07_04215	CP020694 (Chromosome)	889527	890312	-	IclR family transcriptional regulator	3	2	3	16	16	41	17	10	23	62	97	77	161	76	54	11.4915	6.94222	9.69275	16.8296	18.1764	33.4767	23.482	17.6534	27.7905	21.2256	44.278	28.0269	37.0363	37.5322	43.4565	3.94113	3.58978	3.80219	4.22341	4.29664	4.90292	4.54399	4.27351	4.71147	4.44382	5.19798	4.72318	5.01182	5.02379
B5M07_04220	CP020694 (Chromosome)	890436	892295	+	C4-dicarboxylate ABC transporter permease	11	3	0	24	31	27	17	3	13	9	5	8	6	6	7	42.1356	10.4133	0	25.2444	35.2168	22.0457	23.482	5.29603	15.7077	3.08114	2.28237	2.91188	1.38024	2.96307	5.63325	4.66245	3.23766	1.81443	4.16677	4.52677	4.02818	4.08105	2.67722	3.66589	2.17625	1.9702	2.13486	1.58205	2.164
B5M07_04225	CP020694 (Chromosome)	892314	893345	+	C4-dicarboxylate ABC transporter substrate-binding protein	8	11	21	61	73	103	45	11	27	7	1	4	3	4	1	30.644	38.1822	67.8492	64.1628	82.9299	84.1001	62.1583	19.4188	32.6236	2.39644	0.456474	1.45594	0.690118	1.97538	0.80475	4.57814	4.81787	5.46083	5.42971	5.71929	5.73968	5.38907	4.13439	4.68215	2.28544	1.56743	1.97977	1.5447	2.19822
B5M07_04230	CP020694 (Chromosome)	893421	895049	+	phosphonate monoester hydrolase	12	8	13	121	108	85	66	14	27	33	16	28	50	18	26	45.9661	27.7689	42.0019	127.274	122.691	69.403	91.1655	24.7148	32.6236	11.2975	7.30358	10.1916	11.502	8.88921	20.9235	5.33017	4.83304	5.2408	6.45355	6.41176	5.78546	6.07943	4.71769	4.99099	3.9697	3.60368	3.87932	3.98146	3.76843
B5M07_04235	CP020694 (Chromosome)	895151	895576	-	cytochrome C	0	0	0	2	2	2	0	0	0	14	15	14	5	10	4	0	0	0	2.1037	2.27205	1.63301	0	0	0	4.79288	6.84711	5.0958	1.1502	4.93845	3.219	0.492516	0.451449	0.421557	0.974205	1.02322	0.816314	0.135512	0.210255	0.0945835	1.64956	1.96486	1.70231	0.58009	1.66489
B5M07_04240	CP020694 (Chromosome)	895573	896871	-	copper oxidase	1	0	0	16	4	25	3	0	1	46	60	95	37	14	21	3.83051	0	0	16.8296	4.5441	20.4126	4.14388	0	1.20828	15.748	27.3884	34.5786	8.51146	6.91383	16.8998	2.46874	1.77018	1.73651	3.69021	2.48473	3.89759	2.42543	1.44696	1.7227	3.63996	4.22119	4.47725	3.02676	2.82986
B5M07_04250	CP020694 (Chromosome)	897537	898109	-	helix-turn-helix transcriptional regulator	0	3	1	0	0	2	0	0	2	1	9	4	1	5	2	0	10.4133	3.23092	0	0	1.63301	0	0	2.41656	0.342349	4.10826	1.45594	0.230039	2.46922	1.6095	0.099137	1.87178	0.828712	-0.367284	-0.345253	0.494709	-0.289611	-0.216421	0.745091	-0.292676	1.24777	0.431392	-0.453307	0.813775
B5M07_04255	CP020694 (Chromosome)	898177	898911	-	cupredoxin	1	1	3	1	13	4	1	2	8	18	22	30	17	3	6	3.83051	3.47111	9.69275	1.05185	14.7683	3.26602	1.38129	3.53068	9.66626	6.16228	10.0424	10.9196	3.91067	1.48153	4.8285	2.1458	2.08476	2.84444	1.3561	3.32327	1.97394	1.51804	2.0589	2.90094	2.50216	2.96267	3.04847	2.09944	1.41685
B5M07_04260	CP020694 (Chromosome)	898957	900231	-	copper oxidase	6	0	1	4	0	3	1	1	0	1	2	7	4	3	8	22.983	0	3.23092	4.2074	0	2.44952	1.38129	1.76534	0	0.342349	0.912948	2.5479	0.920158	1.48153	6.438	3.11826	0.444313	1.22796	1.54677	0.0225494	1.11108	0.741686	0.882526	0.0448188	-0.0127384	0.447309	1.15866	0.414207	0.748257
B5M07_04265	CP020694 (Chromosome)	900333	901796	-	copper resistance protein	1	11	1	1	6	1	2	5	2	17	3	9	6	1	2	3.83051	38.1822	3.23092	1.05185	6.81616	0.816506	2.76259	8.82671	2.41656	5.81993	1.36942	3.27587	1.38024	0.493845	1.6095	1.77867	4.0747	1.67532	0.988455	2.32926	0.837315	1.56405	2.54823	1.46782	2.21728	1.03806	1.69215	1.00585	0.548441
B5M07_04270	CP020694 (Chromosome)	901796	902086	-	hypothetical protein	0	0	1	0	0	0	0	0	0	0	0	0	0	0	0	0	0	3.23092	0	0	0	0	0	0	0	0	0	0	0	0	-2.04133	-2.05845	-1.72341	-2.26589	-2.25252	-2.3099	-2.21855	-2.17593	-2.2418	-2.4518	-2.41093	-2.44938	-2.46548	-2.39726
B5M07_04275	CP020694 (Chromosome)	902169	902549	-	hypothetical protein	2	6	8	10	22	38	1	2	2	19	20	7	43	11	9	7.66101	20.8267	25.8473	10.5185	24.9926	31.0272	1.38129	3.53068	2.41656	6.50463	9.12948	2.5479	9.8917	5.43229	7.24275	3.00732	3.91408	4.14468	3.28559	4.15841	4.39776	1.90729	2.4227	2.14796	2.83849	3.15505	2.069	3.23364	2.6824
B5M07_04280	CP020694 (Chromosome)	902692	903594	-	DUF305 domain-containing protein	33	84	210	506	632	1382	95	61	61	15	100	115	29	16	37	126.407	291.573	678.492	532.236	717.969	1128.41	131.223	107.686	73.7052	5.13523	45.6474	41.8583	6.67114	7.90152	29.7758	6.8939	7.79544	8.75452	8.47952	8.82388	9.35227	6.93555	6.72912	6.34355	4.14926	5.87216	5.789	4.29408	4.43349
B5M07_04285	CP020694 (Chromosome)	903794	904072	+	transcriptional regulator	15	32	7	7	16	21	13	35	32	15	12	46	28	12	9	57.4576	111.076	22.6164	7.36294	18.1764	17.1466	17.9568	61.787	38.665	5.13523	5.47769	16.7433	6.4411	5.92614	7.24275	5.33299	6.08062	4.36575	3.3393	4.16057	4.10346	4.14838	5.43919	4.93616	2.99792	3.06079	4.07966	3.18083	3.12839
B5M07_04290	CP020694 (Chromosome)	904388	905242	+	NAD(P)-dependent oxidoreductase	8	6	2	5	17	14	7	7	12	2	12	7	6	3	1	30.644	20.8267	6.46183	5.25925	19.3124	11.4311	9.66906	12.3574	14.4994	0.684698	5.47769	2.5479	1.38024	1.48153	0.80475	4.16324	3.75274	2.6664	2.49257	3.74555	3.2157	3.03844	3.26767	3.44471	1.08989	2.52132	1.87868	1.42054	1.53434
B5M07_04295	CP020694 (Chromosome)	905377	906393	-	hypothetical protein	5	18	10	93	179	190	17	11	7	7	13	23	14	3	12	19.1525	62.48	32.3092	97.822	203.349	155.136	23.482	19.4188	8.45797	2.39644	5.93416	8.37167	3.22055	1.48153	9.657	4.25595	5.47765	4.77225	6.00919	6.85105	6.5405	4.45978	4.26975	3.50526	2.47241	3.16681	3.46077	2.65402	2.24475
B5M07_04300	CP020694 (Chromosome)	906390	907145	-	hypothetical protein	2	5	27	178	244	366	30	8	16	8	11	12	26	8	2	7.66101	17.3556	87.2347	187.229	277.19	298.841	41.4388	14.1227	19.3325	2.73879	5.02121	4.36783	5.98103	3.95076	1.6095	3.57774	4.20987	5.89202	6.79215	7.25235	7.34315	5.09058	4.00949	4.30446	2.6022	3.07065	2.94913	3.19337	2.89109
B5M07_04305	CP020694 (Chromosome)	908094	909665	+	peptide ABC transporter substrate-binding protein	86	126	255	385	327	945	620	374	719	210	181	190	288	148	121	329.423	437.36	823.884	404.962	371.481	771.598	856.403	660.238	868.755	71.8933	82.6218	69.1572	66.2514	73.089	97.3748	8.28007	8.58113	9.275	8.50025	8.4082	9.20407	9.31986	9.03066	9.33603	6.78415	6.91101	6.74965	6.71025	6.80021
B5M07_04310	CP020694 (Chromosome)	909748	910704	+	ABC transporter permease	11	2	18	44	57	111	57	42	58	51	34	44	46	12	16	42.1356	6.94222	58.1565	46.2814	64.7535	90.6322	78.7338	74.1444	70.0804	17.4598	15.5201	16.0154	10.5818	5.92614	12.876	5.24289	3.76061	5.58001	5.35278	5.70885	6.07739	5.91888	5.85069	5.79364	4.37567	4.26667	4.29426	3.9103	3.44806
B5M07_04315	CP020694 (Chromosome)	910701	911525	+	ABC transporter permease	12	13	7	60	44	170	39	38	89	66	71	85	53	29	18	45.9661	45.1244	22.6164	63.1109	49.9852	138.806	53.8705	67.083	107.537	22.595	32.4096	30.9388	12.1921	14.3215	14.4855	5.44395	5.42616	4.77449	5.77984	5.5357	6.63808	5.61255	5.84109	6.35344	4.74144	5.09572	5.04911	4.16934	4.32163
B5M07_04320	CP020694 (Chromosome)	911544	913160	+	ABC transporter	5	2	15	63	50	132	48	26	60	136	102	102	64	32	19	19.1525	6.94222	48.4637	66.2665	56.8013	107.779	66.3022	45.8989	72.4969	46.5594	46.5603	37.1265	14.7225	15.803	15.2903	4.61506	3.90115	5.47769	5.81274	5.64951	6.34064	5.81162	5.42641	5.90777	5.44497	5.44467	5.21234	4.31536	4.38713
B5M07_04325	CP020694 (Chromosome)	913173	914504	-	aspartate aminotransferase family protein	1	2	0	6	6	2	10	6	11	97	94	88	235	124	108	3.83051	6.94222	0	6.31109	6.81616	1.63301	13.8129	10.5921	13.2911	33.2078	42.9085	32.0307	54.0593	61.2368	86.913	3.01926	3.33285	2.38572	3.16242	3.22835	2.27701	3.8524	3.61574	3.81531	4.74749	5.02156	4.70879	5.27725	5.41131
B5M07_04330	CP020694 (Chromosome)	914508	915620	-	aminoglycoside phosphotransferase	5	4	3	3	0	2	5	3	11	67	55	50	148	117	90	19.1525	13.8844	9.69275	3.15555	0	1.63301	6.90647	5.29603	13.2911	22.9374	25.1061	18.1993	34.0458	57.7798	72.4275	4.06031	3.76443	3.45922	2.55963	1.6931	2.15293	3.1485	2.96395	3.72665	4.2817	4.37464	4.04259	4.7022	5.27685
B5M07_04335	CP020694 (Chromosome)	915617	916906	-	acetylornithine deacetylase	2	0	1	1	4	0	1	3	7	69	35	58	186	139	87	7.66101	0	3.23092	1.05185	4.5441	0	1.38129	5.29603	8.45797	23.6221	15.9766	21.1112	42.7873	68.6444	70.0133	3.07569	1.96509	2.52312	1.77935	2.61338	1.2303	1.95546	2.7583	3.13833	4.18091	3.76719	4.06078	4.83169	5.35816
B5M07_04340	CP020694 (Chromosome)	916926	918488	-	acetolactate synthase large subunit	2	4	2	1	0	3	10	3	9	80	55	54	152	121	70	7.66101	13.8844	6.46183	1.05185	0	2.44952	13.8129	5.29603	10.8745	27.3879	25.1061	19.6552	34.966	59.7552	56.3325	3.24914	3.7274	3.11714	1.98938	1.63737	2.32792	3.73073	2.92347	3.50497	4.44064	4.34673	4.09281	4.70439	5.28895
B5M07_04345	CP020694 (Chromosome)	918485	919513	-	acetylpolyamine amidohydrolase	0	2	1	0	0	0	1	0	1	14	20	10	38	29	16	0	6.94222	3.23092	0	0	0	1.38129	0	1.20828	4.79288	9.12948	3.63986	8.7415	14.3215	12.876	0.920068	2.18691	1.62252	0.423219	0.453734	0.323805	1.11485	0.628448	1.03591	1.98998	2.60129	1.74406	2.57161	3.05785
B5M07_04350	CP020694 (Chromosome)	919637	920296	+	GntR family transcriptional regulator	9	11	8	9	12	2	12	18	29	50	48	61	264	179	115	34.4745	38.1822	25.8473	9.46664	13.6323	1.63301	16.5755	31.7762	35.0402	17.1174	21.9107	22.2031	60.7304	88.3982	92.5463	4.97112	5.07547	4.69223	3.77062	4.08713	2.64877	4.26826	4.89756	4.99941	4.2857	4.52742	4.54019	5.58762	5.99611
B5M07_04355	CP020694 (Chromosome)	920396	921970	+	peptide ABC transporter substrate-binding protein	31	44	82	104	132	140	122	76	180	280	229	386	1254	2026	1203	118.746	152.729	264.935	109.392	149.955	114.311	168.518	134.166	217.491	95.8577	104.532	140.498	288.469	1000.53	968.115	7.12351	7.3643	7.92799	7.04104	7.34407	7.08142	7.46097	7.23581	7.72242	6.91879	6.99758	7.2789	8.02044	9.36636
B5M07_04360	CP020694 (Chromosome)	922046	923017	+	ABC transporter permease	19	6	16	6	13	5	13	13	24	94	74	130	362	458	374	72.7796	20.8267	51.6947	6.31109	14.7683	4.08253	17.9568	22.9494	28.9988	32.1808	33.7791	47.3181	83.2743	226.181	300.977	5.9011	4.67837	5.54535	3.6653	4.33823	3.35971	4.51721	4.74697	4.96666	5.06732	5.1165	5.46316	6.06681	7.18197
B5M07_04365	CP020694 (Chromosome)	923014	923853	+	ABC transporter permease	3	4	7	22	10	16	8	15	22	97	111	157	348	424	458	11.4915	13.8844	22.6164	23.1407	11.3603	13.0641	11.0504	26.4801	26.5822	33.2078	50.6686	57.1457	80.0537	209.39	368.576	4.19166	4.32048	4.72319	4.72494	4.08792	4.19536	4.07533	4.85918	4.85988	5.07878	5.51588	5.64361	6.00715	7.08016
B5M07_04370	CP020694 (Chromosome)	923850	925472	+	microcin ABC transporter ATP-binding protein	14	6	15	67	40	21	55	40	59	241	237	348	806	888	766	53.6271	20.8267	48.4637	70.4739	45.441	17.1466	75.9712	70.6137	71.2886	82.5061	108.184	126.667	185.412	438.534	616.439	5.97251	5.17194	5.87498	6.2303	5.80092	4.95245	6.30644	6.23345	6.2421	6.38979	6.67097	6.83758	7.24776	8.2063
B5M07_04375	CP020694 (Chromosome)	925491	926258	+	oxidoreductase	8	4	5	20	34	47	31	41	39	95	64	131	236	235	151	30.644	13.8844	16.1546	21.037	38.6249	38.3758	42.8201	72.379	47.123	32.5231	29.2143	47.6821	54.2893	116.054	121.517	5.08431	4.41938	4.52905	4.71481	5.29998	5.29319	5.40364	5.94618	5.50107	5.12667	5.02124	5.51456	5.64958	6.4636
B5M07_04380	CP020694 (Chromosome)	926442	926912	+	(2Fe-2S)-binding protein	2	2	2	3	4	42	4	2	1	8	7	29	21	3	6	7.66101	6.94222	6.46183	3.15555	4.5441	34.2933	5.52518	3.53068	1.20828	2.73879	3.19532	10.5556	4.83083	1.48153	4.8285	2.64424	2.57012	2.51628	1.96547	2.24597	4.2604	2.40711	2.0685	1.43891	1.81831	1.947	3.03306	2.29305	1.41349
B5M07_04385	CP020694 (Chromosome)	926917	929217	+	aldehyde dehydrogenase	11	10	4	50	100	258	44	14	25	98	142	194	98	54	46	42.1356	34.7111	12.9237	52.5925	113.603	210.659	60.777	24.7148	30.207	33.5502	64.8193	70.6132	22.5439	26.6676	37.0185	5.42453	5.23851	4.40823	5.64815	6.46687	7.15279	5.7971	4.91149	5.09528	5.19313	5.86738	5.95816	4.80571	4.9696
B5M07_04390	CP020694 (Chromosome)	929462	929797	+	hypothetical protein	9	1	1	13	7	3	5	17	15	59	71	67	47	53	41	34.4745	3.47111	3.23092	13.674	7.95218	2.44952	6.90647	30.0108	18.1242	20.1986	32.4096	24.387	10.8119	26.1738	32.9948	4.69753	2.90108	2.85313	3.80189	3.31667	2.45321	3.21023	4.58037	4.07412	4.18936	4.67938	4.38262	3.57337	4.45442
B5M07_04395	CP020694 (Chromosome)	929810	931753	+	hypothetical protein	58	22	41	168	116	88	129	67	114	417	434	571	630	445	361	222.169	76.3645	132.468	176.711	131.779	71.8525	178.187	118.278	137.744	142.759	198.11	207.836	144.925	219.761	290.515	7.64826	6.57963	7.11422	7.40992	7.1076	6.50961	7.41845	6.99904	7.15274	7.18904	7.53018	7.58088	7.2045	7.63991
B5M07_04400	CP020694 (Chromosome)	931760	933652	+	glycosyltransferase	38	14	10	152	110	115	70	35	90	325	326	381	449	275	235	145.559	48.5956	32.3092	159.881	124.963	93.8982	96.6906	61.787	108.745	111.263	148.81	138.678	103.288	135.807	189.116	7.05133	5.97243	5.61654	7.15439	6.89473	6.60018	6.63033	6.18702	6.75061	6.77446	7.0791	7.0047	6.69761	6.98252
B5M07_04405	CP020694 (Chromosome)	933649	935064	+	hypothetical protein	12	3	3	56	48	62	41	22	61	208	145	291	289	129	50	45.9661	10.4133	9.69275	58.9036	54.5293	50.6234	56.6331	38.8375	73.7052	71.2086	66.1887	105.92	66.4814	63.706	40.2375	5.54838	4.32346	4.26793	5.79961	5.72012	5.64442	5.7586	5.38065	6.03294	5.99941	5.92226	6.42385	5.9275	5.88219
B5M07_04410	CP020694 (Chromosome)	935069	936034	+	hypothetical protein	144	67	49	197	131	116	122	176	133	190	129	187	238	149	95	551.593	232.564	158.315	207.214	148.819	94.7147	168.518	310.7	160.701	65.0463	58.8851	68.0653	54.7494	73.5829	76.4513	8.58585	7.6327	7.22582	7.51241	7.16267	6.70042	7.2927	7.95037	7.24295	6.3291	6.23444	6.37311	6.16374	6.44961
B5M07_04415	CP020694 (Chromosome)	936021	938024	+	sensor histidine kinase	48	31	36	173	121	202	150	96	130	274	258	331	460	224	148	183.864	107.604	116.313	181.97	137.459	164.934	207.194	169.473	157.077	93.8036	117.77	120.479	105.818	110.621	119.103	7.39717	6.85374	6.93004	7.38902	7.0985	7.28724	7.52273	7.31473	7.23636	6.71672	6.94058	6.96353	6.83348	6.8778
B5M07_04420	CP020694 (Chromosome)	938021	938380	+	response regulator	4	2	4	27	17	14	1	9	5	43	27	57	68	24	9	15.322	6.94222	12.9237	28.3999	19.3124	11.4311	1.38129	15.8881	6.04141	14.721	12.3248	20.7472	15.6427	11.8523	7.24275	3.79666	3.16105	3.64757	4.44356	4.04556	3.5376	2.17099	3.84641	2.99173	3.78327	3.60913	4.12888	3.84459	3.57155
B5M07_04425	CP020694 (Chromosome)	938509	939141	+	hypothetical protein	1	2	0	14	3	7	3	2	5	20	10	11	33	9	5	3.83051	6.94222	0	14.7259	3.40808	5.71554	4.14388	3.53068	6.04141	6.84698	4.56474	4.00384	7.5913	4.4446	4.02375	2.15356	2.55164	1.44584	3.25506	2.03097	2.42808	2.17329	2.0706	2.47071	2.5939	2.23945	2.13124	2.68928	2.21774
B5M07_04430	CP020694 (Chromosome)	939160	940065	-	LysR family transcriptional regulator	23	12	20	4	11	4	6	16	14	51	19	37	33	43	27	88.1016	41.6533	64.6183	4.2074	12.4963	3.26602	8.28777	28.2455	16.9159	17.4598	8.673	13.4675	7.5913	21.2353	21.7283	5.79864	4.97498	5.45725	2.90637	3.79115	2.71123	3.43708	4.58741	4.07804	4.10971	3.44465	3.8544	3.31571	4.30637
B5M07_04435	CP020694 (Chromosome)	940223	941209	+	quinone oxidoreductase	4	0	0	0	0	4	0	0	0	6	2	2	3	0	2	15.322	0	0	0	0	3.26602	0	0	0	2.05409	0.912948	0.727971	0.690118	0	1.6095	2.03815	-0.281653	-0.310184	-0.734953	-0.71452	0.766206	-0.648278	-0.55067	-0.698252	0.437164	-0.137961	-0.267379	-0.304757	-0.936172
B5M07_04440	CP020694 (Chromosome)	941497	942477	+	C4-dicarboxylate ABC transporter substrate-binding protein	37	42	42	943	768	1064	680	250	769	474	359	347	577	227	145	141.729	145.787	135.698	991.894	872.468	868.762	939.281	441.336	929.169	162.273	163.874	126.303	132.733	112.103	116.689	7.46532	7.49137	7.42243	9.50827	9.36477	9.36029	9.44696	8.61929	9.43499	7.58885	7.59874	7.34533	7.39264	7.23246
B5M07_04445	CP020694 (Chromosome)	942589	944829	+	C4-dicarboxylate ABC transporter permease	25	18	21	249	266	339	169	83	247	667	392	531	669	264	207	95.7626	62.48	67.8492	261.91	302.183	276.796	233.439	146.523	298.446	228.347	178.938	193.276	153.896	130.375	166.583	6.84178	6.44639	6.51865	7.86419	8.0176	7.92358	7.74154	7.25802	8.0041	7.719	7.46319	7.54355	7.30745	7.13865
B5M07_04450	CP020694 (Chromosome)	944940	945851	+	permease	1	0	0	7	13	6	3	0	10	26	14	10	34	8	7	3.83051	0	0	7.36294	14.7683	4.89904	4.14388	0	12.0828	8.90107	6.39063	3.63986	7.82134	3.95076	5.63325	2.12795	1.37743	1.34824	2.63614	3.30741	2.28259	2.15186	1.09476	3.10304	2.83473	2.52002	2.03091	2.7142	2.10132
B5M07_04455	CP020694 (Chromosome)	945970	946560	+	TetR family transcriptional regulator	1	6	5	3	3	5	0	6	1	22	1	7	21	0	2	3.83051	20.8267	16.1546	3.15555	3.40808	4.08253	0	10.5921	1.20828	7.53168	0.456474	2.5479	4.83083	0	1.6095	1.83479	3.40034	3.13241	1.70527	1.76487	1.91502	0.636497	2.76475	1.13017	2.49882	0.569619	1.52446	2.07969	0.210989
B5M07_04460	CP020694 (Chromosome)	946563	947642	+	efflux transporter periplasmic adaptor subunit	2	5	1	9	4	11	8	9	5	20	19	33	33	11	28	7.66101	17.3556	3.23092	9.46664	4.5441	8.98157	11.0504	15.8881	6.04141	6.84698	8.673	12.0115	7.5913	5.43229	22.533	3.044	3.75315	2.50419	3.21347	2.60298	3.16562	3.35432	3.69676	2.82648	2.91563	3.13307	3.44449	3.00831	2.71727
B5M07_04465	CP020694 (Chromosome)	947647	950697	+	MFS transporter	7	11	12	19	14	19	25	45	52	135	108	141	106	69	82	26.8135	38.1822	38.771	19.9851	15.9044	15.5136	34.5324	79.4404	62.8307	46.2171	49.2992	51.322	24.3842	34.0753	65.9895	4.90094	5.2334	5.24856	4.60852	4.40525	4.37591	5.13438	5.996	5.74932	5.43161	5.49829	5.54056	4.78787	5.12023
B5M07_04470	CP020694 (Chromosome)	950888	951802	+	ABC transporter substrate-binding protein	5	16	13	59	74	135	44	17	48	66	113	158	101	36	16	19.1525	55.5378	42.0019	62.0591	84.0659	110.228	60.777	30.0108	57.9975	22.595	51.5815	57.5097	23.234	17.7784	12.876	4.66809	5.65715	5.37697	5.78083	6.10336	6.39972	5.75766	5.04779	5.70935	4.76477	5.58963	5.70346	4.79007	4.54307
B5M07_04475	CP020694 (Chromosome)	951820	952986	+	ABC transporter permease	7	11	14	55	115	119	108	43	169	76	93	290	102	63	28	26.8135	38.1822	45.2328	57.8517	130.643	97.1642	149.18	75.9097	204.2	26.0185	42.4521	105.556	23.464	31.1122	22.533	5.13363	5.44684	5.60664	5.84863	6.70904	6.39091	6.85315	6.12779	7.20175	5.06037	5.53585	6.48119	4.9617	5.23219
B5M07_04480	CP020694 (Chromosome)	952983	953918	+	amino acid ABC transporter ATP-binding protein	6	3	1	26	41	41	45	16	51	56	71	107	61	39	13	22.983	10.4133	3.23092	27.3481	46.5771	33.4767	62.1583	28.2455	61.6224	19.1715	32.4096	38.9465	14.0324	19.2599	10.4618	4.55308	3.89408	3.23535	4.72212	5.27092	4.92849	5.57762	4.7526	5.5698	4.36958	4.89697	5.0884	4.06824	4.37503
B5M07_04485	CP020694 (Chromosome)	953915	954649	+	ABC transporter	5	7	1	21	18	28	24	11	43	35	21	47	33	10	1	19.1525	24.2978	3.23092	22.0888	20.4485	22.8622	33.1511	19.4188	51.9561	11.9822	9.58595	17.1073	7.5913	4.93845	0.80475	4.09156	4.32689	2.8249	4.25796	4.17885	4.29584	4.67594	4.12147	5.16432	3.65548	3.44601	4.00579	3.22605	2.8718
B5M07_04490	CP020694 (Chromosome)	954653	955348	-	haloacid dehalogenase, type II	24	10	35	59	101	140	17	36	24	43	45	33	43	13	11	91.9321	34.7111	113.082	62.0591	114.739	114.311	23.482	63.5523	28.9988	14.721	20.5413	12.0115	9.8917	6.41998	8.85225	6.10386	5.08928	6.33696	5.69686	6.36753	6.36557	4.70741	5.71791	4.91167	4.25403	4.57078	4.06964	3.89193	3.55537
B5M07_04495	CP020694 (Chromosome)	955421	956725	-	gamma-glutamylputrescine oxidoreductase	8	8	24	70	81	130	12	3	8	94	175	83	85	84	41	30.644	27.7689	77.542	73.6294	92.0181	106.146	16.5755	5.29603	9.66626	32.1808	79.8829	30.2108	19.5534	41.483	32.9948	5.00946	4.91652	5.95298	5.91021	6.15136	6.31013	4.42845	3.59951	3.97232	5.05019	6.00179	4.98684	4.56012	5.30868
B5M07_04500	CP020694 (Chromosome)	956725	958074	-	glutamine synthetase	11	49	54	50	49	62	12	2	6	278	193	113	262	107	28	42.1356	170.084	174.469	52.5925	55.6653	50.6234	16.5755	3.53068	7.24969	95.173	88.0994	41.1304	60.2703	52.8414	22.533	5.42829	6.90633	6.9361	5.6518	5.71028	5.61287	4.55235	3.55614	3.90254	6.28211	6.19816	5.40087	5.79535	5.65761
B5M07_04505	CP020694 (Chromosome)	958199	958915	+	GntR family transcriptional regulator	7	20	10	14	2	14	8	4	3	71	45	51	88	59	27	26.8135	69.4222	32.3092	14.7259	2.27205	11.4311	11.0504	7.06137	3.62485	24.3068	20.5413	18.5633	20.2435	29.1368	21.7283	4.50733	5.5242	4.70246	3.93876	2.55573	3.7	3.67826	3.32103	2.8245	4.4388	4.26633	4.16489	4.25277	4.62519
B5M07_04510	CP020694 (Chromosome)	958984	960096	+	hypothetical protein	0	5	3	5	6	9	6	6	5	18	7	12	37	12	4	0	17.3556	9.69275	5.25925	6.81616	7.34855	8.28777	10.5921	6.04141	6.16228	3.19532	4.36783	8.51146	5.92614	3.219	1.65928	3.5359	2.99165	2.49266	2.71212	2.78144	2.88288	3.10134	2.60861	2.62513	2.07888	2.32516	2.92626	2.59046
B5M07_04515	CP020694 (Chromosome)	960190	961107	+	metal-dependent hydrolase	0	0	0	3	3	7	4	2	4	36	12	7	21	9	5	0	0	0	3.15555	3.40808	5.71554	5.52518	3.53068	4.83313	12.3246	5.47769	2.5479	4.83083	4.4446	4.02375	1.16176	1.12606	1.09972	1.76956	1.82628	2.24871	2.20405	1.85462	2.09686	2.99473	2.22171	1.59431	2.11647	2.03947
B5M07_04520	CP020694 (Chromosome)	961138	961476	-	hypothetical protein (no CDD)	8	3	3	3	9	3	1	16	4	9	5	8	10	3	2	30.644	10.4133	9.69275	3.15555	10.2242	2.44952	1.38129	28.2455	4.83313	3.08114	2.28237	2.91188	2.30039	1.48153	1.6095	4.0293	2.90213	2.84215	1.933	2.96163	1.73848	1.47625	4.01102	2.27066	1.88065	1.65518	1.8358	1.63636	1.36872
B5M07_04525	CP020694 (Chromosome)	961653	962078	-	hypothetical protein (no CDD)	3	0	0	22	8	11	13	4	18	198	162	210	126	97	44	11.4915	0	0	23.1407	9.08821	8.98157	17.9568	7.06137	21.7491	67.7851	73.9488	76.437	28.985	47.903	35.409	3.84625	2.62475	2.58662	4.46196	3.59259	3.57089	4.21249	3.41926	4.3996	5.60809	5.70309	5.74086	4.69709	5.22731
B5M07_04530	CP020694 (Chromosome)	962075	962332	-	hypothetical protein (no CDD)	0	0	0	0	0	0	1	0	2	27	18	26	15	14	6	0	0	0	0	0	0	1.38129	0	2.41656	9.24342	8.21653	9.46362	3.45059	6.91383	4.8285	0.65655	0.613441	0.582064	0.183743	0.211086	0.094301	0.888335	0.366809	1.21399	2.43052	2.30566	2.45245	1.51878	2.13526
B5M07_04535	CP020694 (Chromosome)	962329	963195	-	flagellar motor stator protein MotA	4	15	3	62	50	58	62	16	108	674	669	726	762	420	257	15.322	52.0667	9.69275	65.2146	56.8013	47.3573	85.6403	28.2455	130.494	230.743	305.381	264.253	175.29	207.415	206.821	4.97225	5.95436	4.67075	6.16307	6.02699	5.84884	6.43824	5.38656	6.8769	7.49553	7.80638	7.64543	7.19539	7.37808
B5M07_04540	CP020694 (Chromosome)	963289	964389	+	hypothetical protein (no CDD)	60	51	67	218	166	226	246	154	259	1444	1137	1526	1478	733	449	229.83	177.027	216.471	229.303	188.58	184.53	339.799	271.863	312.945	494.352	519.011	555.442	339.998	361.988	361.333	7.95716	7.69844	7.89675	7.95308	7.75726	7.73532	8.35803	8.12687	8.2722	8.75628	8.80861	8.88193	8.35889	8.42464
B5M07_04545	CP020694 (Chromosome)	964576	965043	+	MucR family transcriptional regulator	44	26	59	141	127	108	79	41	92	728	567	711	662	393	227	168.542	90.2489	190.624	148.311	144.275	88.1826	109.122	72.379	111.162	249.23	258.821	258.794	152.286	194.081	182.678	7.35135	6.7276	7.47966	7.21996	7.1916	6.69713	6.90894	6.51142	6.92718	7.76667	7.80706	7.80707	7.24726	7.50053
B5M07_04550	CP020694 (Chromosome)	965086	966015	+	hypothetical protein	20	5	8	71	53	83	94	47	75	531	462	476	373	209	128	76.6101	17.3556	25.8473	74.6813	60.2094	67.77	129.842	82.9711	90.6211	181.787	210.891	173.257	85.8047	103.214	103.008	6.30893	5.02271	5.31774	6.28092	6.06569	6.18272	6.85422	6.38812	6.47843	7.21823	7.38015	7.16599	6.42235	6.61393
B5M07_04555	CP020694 (Chromosome)	966291	966923	+	hypothetical protein (no CDD)	33	47	68	181	154	166	240	65	275	798	541	907	1074	540	296	126.407	163.142	219.702	190.385	174.948	135.54	331.511	114.747	332.278	273.194	246.952	330.135	247.062	266.676	238.206	7.21879	7.46885	7.7709	7.62353	7.53739	7.28102	8.20387	7.12038	8.20647	7.99913	7.89292	8.20021	7.89346	7.9736
B5M07_04560	CP020694 (Chromosome)	966977	968356	+	hypothetical protein	9	13	20	156	156	191	261	41	188	986	917	1143	897	420	256	34.4745	45.1244	64.6183	164.088	177.22	155.953	360.518	72.379	227.157	337.556	418.586	416.035	206.345	207.415	206.016	5.94766	6.15713	6.46623	7.36754	7.44717	7.31516	8.20377	6.56126	7.70729	8.1334	8.36878	8.36217	7.60657	7.61185
B5M07_04565	CP020694 (Chromosome)	968368	969036	+	hypothetical protein	1	1	7	43	21	40	35	11	30	212	252	243	147	96	67	3.83051	3.47111	22.6164	45.2295	23.8566	32.6602	48.3453	19.4188	36.2485	72.578	115.031	88.4485	33.8158	47.4091	53.9183	3.60459	3.53909	4.71647	5.38615	4.74886	5.05514	5.45393	4.56423	5.15988	5.8895	6.39227	6.10383	5.08981	5.43699
B5M07_04570	CP020694 (Chromosome)	969056	969625	-	hypothetical protein (no CDD)	69	70	62	75	55	61	97	85	94	95	86	127	236	151	97	264.305	242.978	200.317	78.8887	62.4814	49.8069	133.986	150.054	113.578	32.5231	39.2567	46.2262	54.2893	74.5706	78.0608	7.63423	7.54196	7.3306	6.35224	6.11877	5.89573	6.90209	7.022	6.72812	5.48938	5.66575	5.82074	5.97665	6.29457
B5M07_04575	CP020694 (Chromosome)	969706	970476	-	flagellar basal body L-ring protein	0	0	0	27	27	30	25	4	12	252	224	216	151	94	55	0	0	0	28.3999	30.6727	24.4952	34.5324	7.06137	14.4994	86.2719	102.25	78.6209	34.736	46.4214	44.2613	2.82813	2.77523	2.7368	4.74676	4.82489	4.59804	4.94543	3.52332	4.09631	5.94071	6.12934	5.83758	4.95872	5.26333
B5M07_04580	CP020694 (Chromosome)	970473	971132	-	flagella basal body P-ring formation protein FlgA	3	0	6	48	35	25	35	9	34	254	253	285	174	125	61	11.4915	0	19.3855	50.4888	39.7609	20.4126	48.3453	15.8881	41.0816	86.9566	115.488	103.736	40.0269	61.7306	49.0898	4.2225	3.16311	4.61311	5.52473	5.27902	4.62585	5.47864	4.4178	5.31212	6.10758	6.41807	6.30033	5.28686	5.73847
B5M07_04585	CP020694 (Chromosome)	971132	971917	-	flagellar basal-body rod protein FlgG	7	3	4	87	47	53	81	13	100	574	507	539	393	251	211	26.8135	10.4133	12.9237	91.5109	53.3932	43.2748	111.885	22.9494	120.828	196.508	231.432	196.188	90.4055	123.955	169.802	5.27768	4.60004	4.72261	6.43168	5.88376	5.67669	6.64247	5.11049	6.7246	7.25471	7.43543	7.25285	6.42002	6.75362
B5M07_04590	CP020694 (Chromosome)	971951	972694	-	flagellar basal-body rod protein FlgF	5	7	6	78	85	43	167	24	145	555	398	412	478	290	235	19.1525	24.2978	19.3855	82.0442	96.5622	35.1098	230.676	42.3682	175.201	190.004	181.677	149.962	109.959	143.215	189.116	5.11661	5.28686	5.10926	6.38767	6.55504	5.55945	7.48643	5.74346	7.18631	7.27654	7.2275	7.02053	6.69129	6.97093
B5M07_04595	CP020694 (Chromosome)	972794	974560	+	hypothetical protein (no CDD)	3	3	9	97	47	112	76	26	63	486	337	372	461	172	77	11.4915	10.4133	29.0782	102.029	53.3932	91.4487	104.978	45.8989	76.1218	166.382	153.832	135.403	106.048	84.9413	61.9658	4.61479	4.53991	5.28896	6.50948	5.84331	6.39453	6.53888	5.69685	6.20297	7.03876	6.95266	6.81436	6.55247	6.31771
B5M07_04600	CP020694 (Chromosome)	974659	975927	+	flagellar hook protein	24	23	25	287	260	283	374	89	382	1624	1429	1403	2376	1729	1053	91.9321	79.8356	80.7729	301.881	295.367	231.071	516.604	157.115	461.564	555.975	652.301	510.672	546.574	853.858	847.402	7.1379	7.01471	7.0228	8.27172	8.24929	7.99949	8.83661	7.62123	8.71636	8.91616	9.08921	8.82476	8.89784	9.38466
B5M07_04605	CP020694 (Chromosome)	975940	977355	+	flagellar hook-associated protein FlgK	4	8	12	324	232	330	289	86	320	2006	1716	2172	1944	1216	831	15.322	27.7689	38.771	340.799	263.558	269.447	399.194	151.819	386.65	686.752	783.309	790.577	447.197	600.515	668.747	5.75367	6.08686	6.31595	8.32081	8.05222	8.07509	8.4885	7.49721	8.45456	9.07872	9.22443	9.23478	8.61094	8.93097
B5M07_04610	CP020694 (Chromosome)	977363	978424	+	hypothetical protein	5	0	3	92	86	135	90	34	72	523	553	480	533	210	175	19.1525	0	9.69275	96.7701	97.6983	110.228	124.317	60.0216	86.9963	179.048	252.43	174.713	122.611	103.707	140.831	5.04795	3.83133	4.58222	6.51222	6.52208	6.64935	6.77574	6.02597	6.40144	7.17208	7.55077	7.14526	6.76351	6.58559
B5M07_04615	CP020694 (Chromosome)	978440	979540	+	flagellar biosynthesis protein FlgA	0	9	6	134	124	169	102	27	127	542	599	752	660	286	178	0	31.24	19.3855	140.948	140.867	137.99	140.892	47.6642	153.452	185.553	273.428	273.717	151.826	141.24	143.246	4.10179	5.56258	5.18758	7.00283	7.00211	6.98073	7.00195	5.91686	7.0928	7.29812	7.72165	7.72303	7.08305	7.00582
B5M07_04620	CP020694 (Chromosome)	979550	979852	+	hypothetical protein	0	0	0	13	11	19	5	0	5	81	55	52	41	21	7	0	0	0	13.674	12.4963	15.5136	6.90647	0	6.04141	27.7303	25.1061	18.9272	9.43162	10.3707	5.63325	1.85494	1.80919	1.77563	3.49378	3.40312	3.62598	2.85429	1.4878	2.7394	4.24685	4.13738	3.84199	3.14272	3.23178
B5M07_04625	CP020694 (Chromosome)	979849	980226	+	hypothetical protein (no CDD)	0	3	1	21	30	38	20	0	14	113	169	126	197	74	51	0	10.4133	3.23092	22.0888	34.0808	31.0272	27.6259	0	16.9159	38.6854	77.1441	45.8622	45.3178	36.5445	41.0423	2.74981	3.81369	3.13447	4.45151	4.89131	4.79636	4.67434	2.34241	4.19351	5.03076	5.7772	5.21166	5.20018	4.96941
B5M07_04630	CP020694 (Chromosome)	980334	981275	+	flagellar protein	1006	1089	887	1502	1314	1546	2560	1744	2737	2710	2449	2605	4450	2209	1598	3853.49	3780.04	2865.82	1579.88	1492.74	1262.32	3536.12	3078.76	3307.07	927.765	1117.9	948.182	1023.68	1090.9	1285.99	11.6288	11.6079	11.3082	10.6818	10.6236	10.4532	11.5355	11.3855	11.4628	10.148	10.3315	10.1692	10.2442	10.3072
B5M07_04635	CP020694 (Chromosome)	981381	981785	+	flaF protein	154	99	94	112	66	82	116	172	156	210	224	229	192	124	82	589.898	343.64	303.706	117.807	74.9777	66.9535	160.23	303.639	188.492	71.8933	102.25	83.3527	44.1676	61.2368	65.9895	8.66188	8.05824	7.92268	6.92098	6.46984	6.35884	7.23937	7.92498	7.41098	6.42567	6.77643	6.57139	5.96362	6.27141
B5M07_04640	CP020694 (Chromosome)	981787	982212	+	flagellum biosynthesis protein FlbT	211	141	136	230	153	165	222	299	300	316	448	580	375	211	182	808.237	489.427	439.405	241.925	173.812	134.723	306.647	527.837	362.485	108.182	204.5	211.112	86.2648	104.201	146.465	9.21464	8.66022	8.5434	7.91235	7.57457	7.32093	8.16029	8.74431	8.33809	7.10673	7.73913	7.77171	6.8924	7.07148
B5M07_04645	CP020694 (Chromosome)	982209	983042	+	hypothetical protein	210	144	91	309	264	283	512	280	476	1006	954	1249	1259	606	460	804.406	499.84	294.013	325.021	299.911	231.071	707.223	494.296	575.142	344.403	435.476	454.618	289.62	299.27	370.185	9.3894	8.88048	8.33449	8.43482	8.3533	8.09293	9.25128	8.86915	9.02975	8.49376	8.73653	8.78154	8.31751	8.35078
B5M07_04650	CP020694 (Chromosome)	983049	984098	-	flagellar motor protein	0	9	10	66	33	75	61	14	57	439	396	484	522	244	144	0	31.24	32.3092	69.422	37.4889	61.2379	84.259	24.7148	68.8721	150.291	180.764	176.169	120.081	120.498	115.884	3.72189	5.33555	5.36286	6.09403	5.48204	5.9658	6.29421	5.10709	6.0858	6.91574	7.11795	7.08989	6.67284	6.67578
B5M07_04655	CP020694 (Chromosome)	984121	984957	-	flagellar biosynthetic protein FliP	1	6	5	125	81	91	45	8	67	625	735	659	628	345	200	3.83051	20.8267	16.1546	131.481	92.0181	74.302	62.1583	14.1227	80.9549	213.968	335.508	239.866	144.465	170.376	160.95	4.24123	5.11213	4.91896	6.84383	6.46752	6.24742	6.06812	4.76753	6.33526	7.37499	7.87701	7.5014	6.94684	7.12485
B5M07_04660	CP020694 (Chromosome)	984944	985402	-	hypothetical protein	4	2	0	57	35	52	34	5	28	314	334	264	264	164	93	15.322	6.94222	0	59.9554	39.7609	42.4583	46.964	8.82671	33.8319	107.498	152.462	96.0922	60.7304	80.9906	74.8418	4.4832	3.95273	3.19988	5.74093	5.31744	5.38412	5.48645	4.00531	5.15627	6.37265	6.75935	6.24984	5.75768	6.06379
B5M07_04665	CP020694 (Chromosome)	985389	986051	-	hypothetical protein	2	0	2	46	24	43	28	11	26	452	369	472	467	175	106	7.66101	0	6.46183	48.3851	27.2646	35.1098	38.6763	19.4188	31.4153	154.742	168.439	171.801	107.428	86.4228	85.3035	4.07398	3.29713	3.94804	5.54913	4.9798	5.22484	5.32248	4.67569	5.11702	6.80365	6.89801	6.92068	6.40059	6.16272
B5M07_04670	CP020694 (Chromosome)	986048	987751	-	flagellar M-ring protein FliF	7	6	23	107	90	91	85	37	119	1436	1027	1086	1492	897	516	26.8135	20.8267	74.3111	112.548	102.242	74.302	117.41	65.3177	143.786	491.613	468.799	395.288	343.219	442.979	415.251	5.69661	5.51085	6.54531	6.94259	6.84678	6.53355	6.98556	6.41669	7.19157	8.51531	8.46211	8.27303	8.11787	8.39901
B5M07_04675	CP020694 (Chromosome)	987934	988467	+	hypothetical protein	47	27	25	57	47	59	156	118	269	1017	550	996	1467	612	471	180.034	93.72	80.7729	59.9554	53.3932	48.1739	215.482	208.31	325.028	348.169	251.061	362.53	337.468	302.233	379.037	7.48682	6.84029	6.69963	6.41139	6.30763	6.2128	7.67409	7.63846	8.11216	8.18769	7.83612	8.23162	8.15394	8.03452
B5M07_04680	CP020694 (Chromosome)	988464	989411	+	hypothetical protein	31	38	54	137	126	103	229	70	207	1281	1149	1574	1271	767	568	118.746	131.902	174.469	144.103	143.139	84.1001	316.317	123.574	250.114	438.549	524.488	572.913	292.38	378.779	457.098	7.20267	7.30221	7.5765	7.38365	7.37718	6.86765	8.18963	7.23505	7.94329	8.54046	8.73538	8.8325	8.10706	8.38233
B5M07_04685	CP020694 (Chromosome)	989392	989793	+	hypothetical protein (no CDD)	4	13	4	66	45	51	72	30	44	316	246	269	274	112	84	15.322	45.1244	12.9237	69.422	51.1212	41.6418	99.4532	52.9603	53.1644	108.182	112.293	97.9121	63.0308	55.3106	67.599	4.68583	5.59744	4.5478	6.02916	5.71629	5.51114	6.40678	5.75228	5.75584	6.50066	6.54044	6.39354	5.93023	5.79577
B5M07_04690	CP020694 (Chromosome)	989790	990419	+	hypothetical protein	7	9	9	123	98	111	166	23	156	856	990	883	728	500	185	26.8135	31.24	29.0782	129.377	111.331	90.6322	229.295	40.6029	188.492	293.051	451.909	321.399	167.469	246.922	148.879	5.58043	5.6917	5.63069	7.00382	6.84964	6.64148	7.60839	5.88668	7.3986	7.87711	8.35765	7.97861	7.27424	7.68999
B5M07_04695	CP020694 (Chromosome)	990431	991549	-	flagellar biosynthesis protein FlhB	5	1	1	2	5	1	3	3	4	14	22	19	27	19	9	19.1525	3.47111	3.23092	2.1037	5.68013	0.816506	4.14388	5.29603	4.83313	4.79288	10.0424	6.91572	6.21106	9.38305	7.24275	3.54929	2.15964	2.11487	1.7605	2.47633	1.28204	2.22738	2.41869	2.34377	2.32893	3.01099	2.65845	2.56103	2.94407
B5M07_04700	CP020694 (Chromosome)	991553	992308	-	flagellar biosynthetic protein FliR	0	0	0	0	0	0	0	0	0	0	0	0	0	0	0	0	0	0	0	0	0	0	0	0	0	0	0	0	0	0	0	0	0	0	0	0	0	0	0	0	0	0	0	0
B5M07_04705	CP020694 (Chromosome)	992311	993309	-	hypothetical protein	1	1	0	1	4	0	1	0	0	1	0	0	3	0	0	3.83051	3.47111	0	1.05185	4.5441	0	1.38129	0	0	0.342349	0	0	0.690118	0	0	0.0245577	-0.0104984	-0.747656	-0.488154	0.611952	-1.22926	-0.359781	-0.962721	-1.09763	-0.977288	-1.345	-1.38723	-0.668883	-1.32983
B5M07_04720	CP020694 (Chromosome)	995801	996631	-	hypothetical protein	0	4	1	21	14	24	22	7	11	165	121	158	195	80	40	0	13.8844	3.23092	22.0888	15.9044	19.5961	30.3885	12.3574	13.2911	56.4876	55.2333	57.5097	44.8577	39.5076	32.19	2.78797	4.06261	3.16621	4.46935	4.15452	4.35169	4.78788	3.93745	3.99102	5.45004	5.42463	5.46926	5.20343	5.06646
B5M07_04725	CP020694 (Chromosome)	996628	996897	-	flagellar biosynthetic protein FliQ	1	1	0	2	0	3	0	2	1	29	37	21	39	11	3	3.83051	3.47111	0	2.1037	0	2.44952	0	3.53068	1.20828	9.92812	16.8895	7.6437	8.97154	5.43229	2.41425	1.85012	1.79123	1.01577	1.44184	0.603615	1.53173	0.681952	1.80392	1.16101	2.76413	3.29983	2.50692	2.6697	2.18117
B5M07_04730	CP020694 (Chromosome)	996901	997233	-	flagellar biosynthesis protein	3	0	0	4	1	4	12	2	10	56	64	105	74	27	19	11.4915	0	0	4.2074	1.13603	3.26602	16.5755	3.53068	12.0828	19.1715	29.2143	38.2185	17.0229	13.3338	15.2903	3.37549	1.94229	1.90759	2.53473	1.82446	2.33312	3.75683	2.46042	3.44742	3.92724	4.37024	4.66398	3.8066	3.55382
B5M07_04735	CP020694 (Chromosome)	997245	997655	-	flagellar basal body rod protein FlgC	1	3	13	19	18	30	25	4	33	93	99	110	160	60	44	3.83051	10.4133	42.0019	19.9851	20.4485	24.4952	34.5324	7.06137	39.8733	31.8384	45.1909	40.0384	36.8063	29.6307	35.409	3.37165	3.91232	5.15902	4.42757	4.44997	4.6252	4.96926	3.56956	5.11853	4.89086	5.25506	5.12839	5.04136	4.81684
B5M07_04740	CP020694 (Chromosome)	997665	998069	-	flagellar basal-body rod protein FlgB	9	22	16	34	27	26	55	21	69	548	292	280	676	214	166	34.4745	76.3645	51.6947	35.7629	30.6727	21.2292	75.9712	37.0722	83.3715	187.607	133.29	101.916	155.507	105.683	133.589	5.46777	6.2238	5.83808	5.47515	5.33321	4.99832	6.21957	5.51528	6.3156	7.18638	6.81371	6.52736	6.98135	6.56552
B5M07_04745	CP020694 (Chromosome)	998140	999480	+	flagellum-specific ATP synthase FliI	28	17	24	57	28	57	77	54	81	419	233	376	353	168	98	107.254	59.0089	77.542	59.9554	31.8087	46.5408	106.36	95.3285	97.8708	143.444	106.358	136.859	81.2039	82.9659	78.8655	6.63349	6.03514	6.30314	6.04384	5.44468	5.79544	6.62816	6.51386	6.54166	6.94705	6.62943	6.89671	6.34922	6.3713
B5M07_04750	CP020694 (Chromosome)	999487	1000635	-	peptidoglycan-binding protein	13	17	18	229	511	706	50	29	22	126	74	82	168	104	60	49.7966	59.0089	58.1565	240.873	580.509	576.453	69.0647	51.1949	26.5822	43.136	33.7791	29.8468	38.6466	51.3599	48.285	5.81763	5.9802	5.96548	7.47469	8.47665	8.46932	6.13495	5.8366	5.2163	5.6619	5.42685	5.30887	5.55387	5.8351
B5M07_04755	CP020694 (Chromosome)	1000754	1001218	-	CREA protein	13	28	74	518	622	1429	62	44	65	4	33	19	4	4	4	49.7966	97.1911	239.088	544.858	706.608	1166.79	85.6403	77.6751	78.5383	1.3694	15.0636	6.91572	0.920158	1.97538	3.219	5.62755	6.32503	7.32916	8.29439	8.60162	9.20007	6.19743	6.09159	6.10537	2.86861	4.47025	3.81808	2.67118	3.07653
B5M07_04760	CP020694 (Chromosome)	1001280	1003001	-	sodium-independent anion transporter	20	22	15	11	8	20	18	42	40	20	39	31	28	18	34	76.6101	76.3645	48.4637	11.5703	9.08821	16.3301	24.8633	74.1444	48.3313	6.84698	17.8025	11.2836	6.4411	8.88921	27.3615	5.75036	5.75033	5.25899	3.86092	3.65658	4.17399	4.58499	5.73459	5.27483	3.37853	4.25448	3.82001	3.31875	3.61065
B5M07_04765	CP020694 (Chromosome)	1003059	1003976	-	MBL fold metallo-hydrolase	21	27	24	16	14	21	23	67	31	27	29	45	58	40	76	80.4406	93.72	77.542	16.8296	15.9044	17.1466	31.7698	118.278	37.4567	9.24342	13.2377	16.3793	13.3423	19.7538	61.161	5.92981	6.0998	5.89421	4.35939	4.30936	4.37278	4.97199	6.37071	5.13898	3.80546	4.12714	4.32207	4.12767	4.50236
B5M07_04770	CP020694 (Chromosome)	1003976	1004416	-	hypothetical protein	30	20	42	3	2	3	11	45	12	8	10	15	10	4	10	114.915	69.4222	135.698	3.15555	2.27205	2.44952	15.1942	79.4404	14.4994	2.73879	4.56474	5.45978	2.30039	1.97538	8.0475	5.9913	5.40605	6.19524	2.44966	2.26193	2.25295	3.79316	5.58987	3.74799	2.24509	2.66767	2.8162	2.09074	2.05126
B5M07_04775	CP020694 (Chromosome)	1004418	1004852	-	hypothetical protein	53	28	22	5	12	6	5	74	16	9	8	5	3	6	10	203.017	97.1911	71.0802	5.25925	13.6323	4.89904	6.90647	130.635	19.3325	3.08114	3.65179	1.81993	0.690118	2.96307	8.0475	6.70726	5.83681	5.47664	2.87631	3.73198	2.80367	3.11342	6.20626	4.08367	2.38555	2.53496	2.01766	1.42884	2.38161
B5M07_04780	CP020694 (Chromosome)	1004947	1005252	+	ArsR family transcriptional regulator	5	3	2	0	0	0	1	5	0	1	0	0	0	0	0	19.1525	10.4133	6.46183	0	0	0	1.38129	8.82671	0	0.342349	0	0	0	0	0	2.51985	1.77888	1.24592	-0.800661	-0.775212	-0.886672	0.102877	1.79811	-0.752271	-0.683673	-1.09224	-1.17293	-1.33258	-1.06413
B5M07_04785	CP020694 (Chromosome)	1005280	1005738	-	hypothetical protein	7	2	5	19	26	87	18	13	9	8	4	28	8	15	1	26.8135	6.94222	16.1546	19.9851	29.5367	71.036	24.8633	22.9494	10.8745	2.73879	1.8259	10.1916	1.84032	7.40767	0.80475	4.29368	3.08046	3.79331	4.03782	4.44791	5.42509	4.25982	4.16869	3.43377	2.23482	1.98535	3.37138	1.92913	3.0723
B5M07_04790	CP020694 (Chromosome)	1006017	1006463	+	hypothetical protein (no CDD)	0	0	4	2	1	10	1	2	4	8	15	14	13	41	12	0	0	12.9237	2.1037	1.13603	8.16506	1.38129	3.53068	4.83313	2.73879	6.84711	5.0958	2.99051	20.2476	9.657	1.29492	1.25671	3.02561	1.59355	1.29359	2.67258	1.40783	1.95699	2.19459	1.72822	2.51865	2.25006	1.79265	3.59592
B5M07_04795	CP020694 (Chromosome)	1006463	1007149	+	flagellar motor protein MotA	0	0	5	3	4	4	2	4	7	16	7	21	4	14	11	0	0	16.1546	3.15555	4.5441	3.26602	2.76259	7.06137	8.45797	5.47758	3.19532	7.6437	0.920158	6.91383	8.85225	1.32336	1.2847	3.26566	1.88217	2.16157	1.90053	1.80335	2.52358	2.70497	2.32954	1.8724	2.63771	1.01013	2.53929
B5M07_04800	CP020694 (Chromosome)	1007142	1007519	+	biopolymer transporter ExbD	1	1	3	2	1	3	0	1	3	1	4	6	1	17	3	3.83051	3.47111	9.69275	2.1037	1.13603	2.44952	0	1.76534	3.62485	0.342349	1.8259	2.18391	0.230039	8.39536	2.41425	1.42295	1.36804	2.24458	1.08453	0.74116	1.19225	0.238507	0.987065	1.48021	0.131231	0.981667	1.11142	-0.0374308	2.28828
B5M07_04805	CP020694 (Chromosome)	1007522	1007911	+	biopolymer transporter ExbD	0	0	0	1	2	0	0	0	0	0	4	9	16	7	1	0	0	0	1.05185	2.27205	0	0	0	0	0	1.8259	3.27587	3.68063	3.45691	0.80475	-0.126128	-0.16183	-0.187815	0.0234652	0.455807	-0.600793	-0.49049	-0.406844	-0.518891	-0.761006	0.35742	0.796259	0.905037	0.82613
B5M07_04810	CP020694 (Chromosome)	1007908	1008873	+	hypothetical protein	0	0	0	5	18	14	4	4	2	18	51	46	46	98	39	0	0	0	5.25925	20.4485	11.4311	5.52518	7.06137	2.41656	6.16228	23.2802	16.7433	10.5818	48.3968	31.3853	1.96261	1.91526	1.88054	2.6907	3.96656	3.38561	2.74097	2.94748	2.16389	2.80446	4.11874	3.77638	3.31606	4.9137
B5M07_04815	CP020694 (Chromosome)	1008887	1010221	-	aspartate aminotransferase family protein	19	8	13	8	12	15	20	17	17	28	24	20	57	11	14	72.7796	27.7689	42.0019	8.41479	13.6323	12.2476	27.6259	30.0108	20.5408	9.58577	10.9554	7.27971	13.1122	5.43229	11.2665	5.56771	4.53988	4.97273	3.42793	3.86042	3.75765	4.55546	4.6369	4.25664	3.52234	3.6486	3.27577	3.81662	3.03742
B5M07_04820	CP020694 (Chromosome)	1010396	1011403	+	BMP family ABC transporter substrate-binding protein	10	21	21	84	81	125	42	25	53	88	130	264	466	581	522	38.3051	72.8933	67.8492	88.3553	92.0181	102.063	58.0144	44.1336	64.0389	30.1267	59.3416	96.0922	107.198	286.924	420.08	5.64981	6.25266	6.18152	6.44641	6.48829	6.59618	6.02306	5.7619	6.12032	5.39272	6.0424	6.53373	6.64831	7.71716
B5M07_04825	CP020694 (Chromosome)	1011403	1012950	+	sugar ABC transporter ATP-binding protein	8	7	1	27	6	28	10	19	20	100	114	185	242	276	152	30.644	24.2978	3.23092	28.3999	6.81616	22.8622	13.8129	33.5415	24.1656	34.2349	52.038	67.3373	55.6695	136.301	122.322	4.96613	4.7494	3.44155	4.888	3.65252	4.6751	4.22253	5.05363	4.73124	5.07522	5.50983	5.78534	5.58256	6.56044
B5M07_04830	CP020694 (Chromosome)	1012940	1013989	+	ABC transporter permease	2	11	12	16	16	18	26	11	48	112	79	116	159	96	54	7.66101	38.1822	38.771	16.8296	18.1764	14.6971	35.9137	19.4188	57.9975	38.3431	36.0614	42.2223	36.5763	47.4091	43.4565	3.83854	5.14201	5.1581	4.3532	4.42513	4.22581	5.08678	4.49315	5.58572	5.157	5.09353	5.25679	5.10876	5.37721
B5M07_04835	CP020694 (Chromosome)	1013989	1014933	+	ABC transporter permease	4	3	2	15	9	22	16	14	29	66	66	72	115	58	35	15.322	10.4133	6.46183	15.7777	10.2242	17.9631	22.1007	24.7148	35.0402	22.595	30.1273	26.207	26.4545	28.643	28.1663	4.09084	3.77928	3.44929	4.09713	3.70899	4.21945	4.42116	4.52995	4.88816	4.4457	4.73807	4.59573	4.60608	4.68583
B5M07_04840	CP020694 (Chromosome)	1014990	1016270	+	cytosine deaminase	6	2	3	61	50	62	39	26	38	155	119	132	260	119	56	22.983	6.94222	9.69275	64.1628	56.8013	50.6234	53.8705	45.8989	45.9147	53.0641	54.3204	48.0461	59.8103	58.7675	45.066	4.82541	3.9731	4.15846	5.81874	5.69087	5.57243	5.63517	5.47047	5.47157	5.62245	5.64649	5.51946	5.74802	5.7286
B5M07_04845	CP020694 (Chromosome)	1016416	1017417	+	type I glyceraldehyde-3-phosphate dehydrogenase	139	109	187	196	207	370	62	83	159	1183	1526	1651	2119	1275	882	532.44	378.351	604.181	206.162	235.157	302.107	85.6403	146.523	192.117	404.999	696.579	600.94	487.454	629.652	709.79	8.90088	8.54139	9.03659	7.92558	8.05621	8.30925	7.10884	7.59765	7.85658	8.6128	9.1921	9.03229	8.8084	9.08258
B5M07_04850	CP020694 (Chromosome)	1017462	1017989	-	transcriptional regulator	1	4	2	1	3	1	2	8	5	35	22	15	33	13	8	3.83051	13.8844	6.46183	1.05185	3.40808	0.816506	2.76259	14.1227	6.04141	11.9822	10.0424	5.45978	7.5913	6.41998	6.438	2.26176	3.26939	2.60372	1.46313	2.11029	1.31602	1.98374	3.33692	2.55954	3.21732	3.03971	2.47198	2.7762	2.61722
B5M07_04855	CP020694 (Chromosome)	1018181	1019254	+	hemolysin-type calcium-binding protein	25	42	31	30	31	39	21	12	19	529	372	589	488	245	164	95.7626	145.787	100.158	31.5555	35.2168	31.8437	29.0072	21.1841	22.9574	181.103	169.808	214.387	112.259	120.992	131.979	6.47892	6.92334	6.52637	5.38562	5.48828	5.39094	5.31377	5.05007	5.10484	7.16799	7.09724	7.35366	6.65201	6.7312
B5M07_04860	CP020694 (Chromosome)	1019291	1019860	-	thioredoxin	7	1	1	3	0	14	5	1	2	15	4	10	17	14	5	26.8135	3.47111	3.23092	3.15555	0	11.4311	6.90647	1.76534	2.41656	5.13523	1.8259	3.63986	3.91067	6.91383	4.02375	3.77959	1.95953	1.91534	1.855	0.773584	3.00134	2.4961	1.54283	1.67924	2.25321	1.43344	1.95216	2.01203	2.52412
B5M07_04865	CP020694 (Chromosome)	1019884	1021275	+	argininosuccinate lyase	15	10	7	30	22	44	19	27	34	162	116	171	206	102	29	57.4576	34.7111	22.6164	31.5555	24.9926	35.9263	26.2446	47.6642	41.0816	55.4605	52.951	62.2415	47.3881	50.3722	23.3378	5.67335	5.17421	4.78123	5.07607	4.85197	5.20392	4.90021	5.48854	5.33865	5.64937	5.60064	5.77049	5.48608	5.54864
B5M07_04870	CP020694 (Chromosome)	1021272	1021451	+	hypothetical protein	0	0	0	2	0	0	1	0	0	4	1	1	3	0	0	0	0	0	2.1037	0	0	1.38129	0	0	1.3694	0.456474	0.363986	0.690118	0	0	-0.896522	-0.921671	-0.939976	-0.380486	-1.20679	-1.29075	-0.646357	-1.09426	-1.19105	-0.561472	-1.01087	-1.07199	-0.8709	-1.33459
B5M07_04875	CP020694 (Chromosome)	1021606	1021923	+	K+-transporting ATPase, A chain	1	4	0	3	6	1	1	0	2	6	18	10	12	4	6	3.83051	13.8844	0	3.15555	6.81616	0.816506	1.38129	0	2.41656	2.05409	8.21653	3.63986	2.76047	1.97538	4.8285	1.72053	2.83899	0.870227	1.61666	2.26261	0.830324	1.12569	0.649002	1.43016	1.28835	2.47609	1.73942	1.51208	1.26897
B5M07_04880	CP020694 (Chromosome)	1021952	1023217	+	diaminopimelate decarboxylase	8	8	6	34	35	32	28	13	34	126	67	95	163	79	68	30.644	27.7689	19.3855	35.7629	39.7609	26.1282	38.6763	22.9494	41.0816	43.136	30.5837	34.5786	37.4964	39.0137	54.723	4.98801	4.8953	4.57463	5.13736	5.2444	4.82655	5.21587	4.70972	5.2775	5.33008	4.9804	5.10376	5.18629	5.22639
B5M07_04885	CP020694 (Chromosome)	1023253	1025796	+	ATPase	122	101	85	139	123	193	244	242	256	285	288	513	408	243	283	467.322	350.582	274.628	146.207	139.731	157.586	337.036	427.213	309.32	97.5694	131.464	186.725	93.8561	120.004	227.744	8.5541	8.24318	7.98346	7.33457	7.28941	7.40974	8.20278	8.45852	8.11112	6.93631	7.22762	7.58246	6.89884	7.13755
B5M07_04890	CP020694 (Chromosome)	1025803	1026861	-	hypothetical protein	45	67	50	117	124	137	181	66	142	420	430	564	510	239	178	172.373	232.564	161.546	123.066	140.867	111.861	250.014	116.513	171.576	143.787	196.284	205.288	117.32	118.029	143.246	7.3863	7.69543	7.31982	7.04435	7.17976	6.95096	7.77198	6.99163	7.38239	7.20037	7.52253	7.56921	6.99641	7.00263
B5M07_04895	CP020694 (Chromosome)	1027024	1027701	+	cell division protein FtsE	2	5	3	12	7	30	8	13	21	38	23	38	55	23	12	7.66101	17.3556	9.69275	12.6222	7.95218	24.4952	11.0504	22.9494	25.3739	13.0093	10.4989	13.8314	12.6522	11.3584	9.657	3.30435	3.96998	3.46829	3.68203	3.27167	4.33732	3.56156	4.25861	4.36816	3.70989	3.50671	3.76934	3.68282	3.58081
B5M07_04900	CP020694 (Chromosome)	1027698	1028606	+	cell division protein FtsX	16	17	14	34	22	40	29	26	41	104	75	90	157	54	25	61.2881	59.0089	45.2328	35.7629	24.9926	32.6602	40.0576	45.8989	49.5396	35.6043	34.2355	32.7587	36.1162	26.6676	20.1188	5.71745	5.67974	5.40938	5.17672	4.82735	5.08605	5.29043	5.4277	5.50764	5.17184	5.13247	5.08812	5.18621	4.88528
B5M07_04905	CP020694 (Chromosome)	1028603	1029340	+	1-acyl-sn-glycerol-3-phosphate acyltransferase	4	0	3	35	26	22	21	15	40	83	61	100	104	55	36	15.322	0	9.69275	36.8147	29.5367	17.9631	29.0072	26.4801	48.3313	28.415	27.8449	36.3986	23.9241	27.1615	28.971	4.17069	2.77486	3.80545	5.00253	4.77612	4.28614	4.7568	4.66453	5.2872	4.74009	4.71901	4.99553	4.56603	4.69365
B5M07_04910	CP020694 (Chromosome)	1029700	1031088	-	dihydrolipoyl dehydrogenase	20	13	30	82	79	170	57	16	50	552	409	561	1378	594	173	76.6101	45.1244	96.9275	86.2516	89.7461	138.806	78.7338	28.2455	60.4141	188.977	186.698	204.196	316.994	293.344	139.222	6.43591	5.94398	6.66626	6.54666	6.58668	7.03488	6.45647	5.5197	6.1974	7.36281	7.34962	7.4461	7.92707	7.84089
B5M07_04915	CP020694 (Chromosome)	1031182	1031577	-	hypothetical protein	19	3	17	20	17	20	10	15	29	135	106	105	267	103	30	72.7796	10.4133	54.9256	21.037	19.3124	16.3301	13.8129	26.4801	35.0402	46.2171	48.3862	38.2185	61.4205	50.866	24.1425	5.83482	4.05674	5.54048	4.58841	4.50922	4.34981	4.21401	4.81199	5.08773	5.37517	5.42264	5.17797	5.67659	5.47496
B5M07_04920	CP020694 (Chromosome)	1031574	1031837	-	hypothetical protein	1	1	0	16	1	7	2	2	2	16	12	13	83	20	7	3.83051	3.47111	0	16.8296	1.13603	5.71554	2.76259	3.53068	2.41656	5.47758	5.47769	4.73181	19.0933	9.8769	5.63325	2.15531	2.09413	1.37722	3.46827	1.40904	2.43568	1.89198	2.06695	1.79809	2.40198	2.40117	2.27222	3.63067	2.95232
B5M07_04925	CP020694 (Chromosome)	1031850	1032233	-	hypothetical protein	19	5	10	9	11	18	9	14	14	67	62	59	86	53	17	72.7796	17.3556	32.3092	9.46664	12.4963	14.6971	12.4317	24.7148	16.9159	22.9374	28.3014	21.4751	19.7834	26.1738	13.6808	5.65103	4.20498	4.79685	3.64861	3.89162	4.03576	3.89128	4.53787	4.17111	4.46819	4.68139	4.40201	4.32019	4.60128
B5M07_04930	CP020694 (Chromosome)	1032313	1033893	-	dihydrolipoamide succinyltransferase	21	9	25	145	139	226	57	45	109	1063	737	684	2806	1257	238	80.4406	31.24	80.7729	152.518	157.908	184.53	78.7338	79.4404	131.703	363.917	336.421	248.966	645.491	620.763	191.531	6.67721	5.87615	6.67835	7.29855	7.33417	7.49525	6.64556	6.65589	7.14954	8.22082	8.13509	7.81113	8.85683	8.8125
B5M07_04935	CP020694 (Chromosome)	1033898	1036858	-	2-oxoglutarate dehydrogenase E1 component	58	39	90	383	362	599	169	86	209	1564	1021	1203	5327	2589	798	222.169	135.373	290.782	402.858	411.241	489.087	233.439	151.819	252.531	535.434	466.06	437.875	1225.42	1278.56	642.191	8.04821	7.58158	8.31394	8.64679	8.6682	8.84992	8.09359	7.68104	8.17134	8.9459	8.7992	8.73377	9.84921	9.89648
B5M07_04940	CP020694 (Chromosome)	1036855	1037052	-	hypothetical protein	0	0	2	1	2	1	0	1	0	19	13	3	50	13	3	0	0	6.46183	1.05185	2.27205	0.816506	0	1.76534	0	6.50463	5.93416	1.09196	11.502	6.41998	2.41425	0.705587	0.662443	1.93711	0.779678	1.21033	0.642006	0.333043	1.07003	0.285406	2.11399	2.02012	0.715132	2.68028	2.09139
B5M07_04945	CP020694 (Chromosome)	1037164	1038051	-	succinate--CoA ligase subunit alpha	37	28	49	243	188	269	85	42	104	691	367	477	2976	1397	299	141.729	97.1911	158.315	255.599	213.573	219.64	117.41	74.1444	125.661	236.563	167.526	173.621	684.597	689.901	240.62	7.29251	6.92719	7.40227	7.89649	7.70819	7.73745	7.10281	6.66764	7.16936	7.81535	7.45773	7.49425	8.97186	8.98019
B5M07_04950	CP020694 (Chromosome)	1038104	1038790	-	hypothetical protein	2	5	14	63	54	52	14	12	39	265	104	134	1529	614	194	7.66101	17.3556	45.2328	66.2665	61.3454	42.4583	19.3381	21.1841	47.123	90.7225	47.4733	48.7741	351.73	303.221	156.122	4.26208	4.77065	5.60391	5.98643	5.90672	5.53453	4.80735	4.89461	5.63942	6.31843	5.64529	5.67245	7.82195	7.65212
B5M07_04955	CP020694 (Chromosome)	1038864	1039157	-	hypothetical protein	0	0	1	3	2	13	0	0	0	13	6	13	96	40	7	0	0	3.23092	3.15555	2.27205	10.6146	0	0	0	4.45054	2.73884	4.73181	22.0838	19.7538	5.63325	1.07752	1.04046	1.75393	1.72367	1.4945	2.82672	0.66849	0.770395	0.612766	2.01538	1.60292	2.07026	3.6244	3.49083
B5M07_04960	CP020694 (Chromosome)	1039305	1040498	-	succinate--CoA ligase subunit beta	27	37	28	219	227	394	63	52	110	722	404	444	4543	2137	511	103.424	128.431	90.4656	230.355	257.878	321.703	87.0216	91.7978	132.911	247.176	184.415	161.61	1045.07	1055.35	411.227	7.03388	7.23921	6.90731	7.82569	7.94355	8.1777	6.86243	6.91408	7.26809	7.89939	7.59628	7.46206	9.47876	9.48945
B5M07_04965	CP020694 (Chromosome)	1040722	1041753	-	hypothetical protein	7	4	9	49	26	193	40	7	30	65	51	52	129	41	43	26.8135	13.8844	29.0782	51.5406	29.5367	157.586	55.2518	12.3574	36.2485	22.2527	23.2802	18.9272	29.6751	20.2476	34.6043	4.81026	4.24278	4.88566	5.4707	4.89941	6.69722	5.54216	4.10787	5.10525	4.61749	4.66246	4.46089	4.90358	4.52716
B5M07_04970	CP020694 (Chromosome)	1041753	1041956	-	hypothetical protein	0	2	0	3	2	1	1	0	0	3	0	0	1	1	0	0	6.94222	0	3.15555	2.27205	0.816506	1.38129	0	0	1.02705	0	0	0.230039	0.493845	0	-0.44476	0.921077	-0.506398	0.475937	0.207861	-0.383227	-0.13794	-0.725249	-0.862532	-0.246126	-1.08231	-1.12457	-0.889766	-0.60255
B5M07_04975	CP020694 (Chromosome)	1041970	1042527	-	hypothetical protein	3	0	8	20	13	35	9	0	1	29	20	27	29	30	11	11.4915	0	25.8473	21.037	14.7683	28.5777	12.4317	0	1.20828	9.92812	9.12948	9.82761	6.67114	14.8153	8.85225	3.38661	1.9647	4.18266	4.01416	3.65303	4.34245	3.48151	1.63578	1.88409	3.27426	3.19402	3.2644	2.89989	3.66678
B5M07_04980	CP020694 (Chromosome)	1042524	1043390	-	CoA ester lyase	1	3	14	13	4	59	4	6	2	3	11	7	17	4	4	3.83051	10.4133	45.2328	13.674	4.5441	48.1739	5.52518	10.5921	2.41656	1.02705	5.02121	2.5479	3.91067	1.97538	3.219	2.33414	3.07577	4.63966	3.40136	2.37965	4.77399	2.54403	3.12782	1.93496	1.27829	2.44879	1.8786	2.22018	1.71414
B5M07_04985	CP020694 (Chromosome)	1043693	1044019	+	hypothetical protein	0	0	0	0	0	0	0	0	0	0	0	2	0	0	0	0	0	0	0	0	0	0	0	0	0	0	0.727971	0	0	0	-2.02754	-2.03284	-2.0367	-2.09707	-2.09293	-2.11069	-2.08241	-2.06921	-2.08961	-2.14353	-2.14197	-1.97946	-2.14442	-2.13774
B5M07_04990	CP020694 (Chromosome)	1044186	1045271	+	photosystem reaction center subunit H	711	1028	1585	8260	13198	29863	2343	2368	2417	550	2498	3789	873	566	756	2723.49	3568.3	5121	8688.27	14993.3	24383.3	3236.37	4180.33	2920.42	188.292	1140.27	1379.14	200.824	279.516	608.391	11.3424	11.6298	12.0222	12.6112	13.2346	13.8012	11.5254	11.8008	11.4162	8.90259	10.4566	10.6442	8.94898	9.20235
B5M07_04995	CP020694 (Chromosome)	1045426	1046388	+	malate dehydrogenase	5	11	12	138	211	337	38	24	42	202	113	155	337	124	57	19.1525	38.1822	38.771	145.155	239.702	275.163	52.4892	42.3682	50.7478	69.1545	51.5815	56.4178	77.5233	61.2368	45.8708	4.9484	5.52022	5.53268	6.87857	7.43253	7.58781	5.81543	5.60753	5.7815	6.09392	5.79572	5.88584	6.21245	5.96926
B5M07_05000	CP020694 (Chromosome)	1046642	1047025	+	succinate dehydrogenase, cytochrome b556 subunit	1	6	2	12	27	51	15	3	3	155	90	75	398	156	101	3.83051	20.8267	6.46183	12.6222	30.6727	41.6418	20.7194	5.29603	3.62485	53.0641	41.0826	27.2989	91.5557	77.0398	81.2798	3.3484	4.46576	3.57122	3.98955	4.84199	5.16078	4.45295	3.35707	3.07295	5.4227	5.14914	4.72571	6.0207	5.82722
B5M07_05005	CP020694 (Chromosome)	1047036	1047407	+	succinate dehydrogenase, hydrophobic membrane anchor protein	2	0	3	3	1	10	8	4	1	46	38	24	111	51	18	7.66101	0	9.69275	3.15555	1.13603	8.16506	11.0504	7.06137	1.20828	15.748	17.346	8.73565	25.5344	25.1861	14.4855	2.98647	1.86619	3.1766	2.2801	1.76681	3.03401	3.31166	2.91126	1.80478	3.67969	3.77612	3.09767	4.18662	4.16535
B5M07_05010	CP020694 (Chromosome)	1047437	1049242	+	succinate dehydrogenase flavoprotein subunit	21	12	10	108	80	123	40	45	28	526	376	456	1417	888	442	80.4406	41.6533	32.3092	113.6	90.8821	100.43	55.2518	79.4404	33.8319	180.076	171.634	165.977	325.966	438.534	355.7	6.48678	5.87782	5.6606	6.82999	6.60279	6.70369	6.11677	6.46972	5.66743	7.31449	7.26307	7.22752	7.96132	8.29224
B5M07_05015	CP020694 (Chromosome)	1049242	1049577	+	hypothetical protein	0	7	0	4	6	9	1	3	6	78	20	37	98	37	29	0	24.2978	0	4.2074	6.81616	7.34855	1.38129	5.29603	7.24969	26.7032	9.12948	13.4675	22.5439	18.2723	23.3378	1.96906	4.08959	1.88805	2.52118	2.91055	2.97226	1.93308	2.72257	2.9645	4.26112	3.17101	3.55177	4.08451	3.8595
B5M07_05020	CP020694 (Chromosome)	1049588	1050367	+	succinate dehydrogenase iron-sulfur subunit	24	5	17	94	97	149	40	41	66	481	542	460	997	622	316	91.9321	17.3556	54.9256	98.8738	110.195	121.659	55.2518	72.379	79.7466	164.67	247.409	167.433	229.349	307.171	254.301	6.61913	5.20906	6.12494	6.68923	6.79989	6.90193	6.11853	6.37982	6.47363	7.22	7.65815	7.23766	7.57609	7.89555
B5M07_05025	CP020694 (Chromosome)	1050410	1050625	+	hypothetical protein	0	0	0	1	0	0	0	0	0	3	0	2	14	1	4	0	0	0	1.05185	0	0	0	0	0	1.02705	0	0.727971	3.22055	0.493845	3.219	-0.574628	-0.604841	-0.626831	-0.414724	-0.947364	-1.01329	-0.887416	-0.812184	-0.928454	-0.393399	-1.08806	-0.554683	0.354085	-0.696713
B5M07_05030	CP020694 (Chromosome)	1050680	1052332	+	FAD-binding dehydrogenase	3	5	12	64	49	29	32	23	33	251	217	187	350	199	134	11.4915	17.3556	38.771	67.3183	55.6653	23.6787	44.2014	40.6029	39.8733	85.9296	99.0548	68.0653	80.5138	98.2751	107.837	4.43215	4.7135	5.4073	5.959	5.76259	4.9267	5.52998	5.44709	5.42758	6.2185	6.3703	5.97216	6.14965	6.36165
B5M07_05035	CP020694 (Chromosome)	1052423	1053127	-	purine-nucleoside phosphorylase	17	17	8	42	38	64	31	31	53	113	131	113	96	54	40	65.1186	59.0089	25.8473	44.1777	43.169	52.2564	42.8201	54.7256	64.0389	38.6854	59.7981	41.1304	22.0838	26.6676	32.19	5.841	5.74078	4.94547	5.4509	5.42754	5.62283	5.41936	5.66816	5.83302	5.31655	5.76388	5.3785	4.7673	4.95034
B5M07_05040	CP020694 (Chromosome)	1053328	1053672	-	DNA-binding protein	7	0	6	2	8	22	2	13	4	27	18	12	40	16	2	26.8135	0	19.3855	2.1037	9.08821	17.9631	2.76259	22.9494	4.83313	9.24342	8.21653	4.36783	9.20158	7.90152	1.6095	4.10018	1.77413	3.77459	1.96452	3.07853	3.75748	2.15805	3.98831	2.53632	3.10294	2.98946	2.421	3.09982	2.95254
B5M07_05045	CP020694 (Chromosome)	1053756	1055723	-	protein meaA	47	41	121	35	24	184	25	10	30	27	12	22	15	6	14	180.034	142.316	390.941	36.8147	27.2646	150.237	34.5324	17.6534	36.2485	9.24342	5.47769	8.00768	3.45059	2.96307	11.2665	6.82531	6.55762	7.73657	5.09876	4.79272	6.63868	5.03171	4.37911	5.08216	3.7602	3.33652	3.63711	2.95981	2.9141
B5M07_05050	CP020694 (Chromosome)	1055888	1057285	+	glycerol-3-phosphate acyltransferase	4	6	9	13	18	15	16	20	25	55	46	47	111	61	48	15.322	20.8267	29.0782	13.674	20.4485	12.2476	22.1007	35.3068	30.207	18.8292	20.9978	17.1073	25.5344	30.1245	38.628	4.15071	4.41658	4.73377	4.01774	4.39518	3.91418	4.47072	4.93759	4.78185	4.31238	4.41982	4.21931	4.61568	4.78293
B5M07_05055	CP020694 (Chromosome)	1057411	1058691	+	crotonyl-CoA carboxylase/reductase	216	158	586	144	134	1519	131	54	105	45	33	42	56	41	31	827.389	548.436	1893.32	151.466	152.228	1240.27	180.95	95.3285	126.87	15.4057	15.0636	15.2874	12.8822	20.2476	24.9473	9.0175	8.54481	9.98449	7.13237	7.13758	9.49451	7.32107	6.65311	6.94635	4.98789	4.97633	4.98302	4.84633	5.21148
B5M07_05060	CP020694 (Chromosome)	1058887	1059093	+	hypothetical protein	0	0	0	0	0	0	0	0	0	0	0	0	0	0	0	0	0	0	0	0	0	0	0	0	0	0	0	0	0	0	0	0	0	0	0	0	0	0	0	0	0	0	0	0
B5M07_05065	CP020694 (Chromosome)	1059041	1059760	+	LuxR family transcriptional regulator	0	2	0	0	0	2	1	0	1	1	5	1	2	0	0	0	6.94222	0	0	0	1.63301	1.38129	0	1.20828	0.342349	2.28237	0.363986	0.460079	0	0	-0.504846	0.845738	-0.564617	-0.958652	-0.931621	-0.0541364	-0.201124	-0.776843	-0.263177	-0.793504	0.226363	-0.771015	-0.700235	-1.10779
B5M07_05070	CP020694 (Chromosome)	1059841	1061379	+	ATPase	3	3	2	14	10	32	17	8	15	106	38	61	158	70	32	11.4915	10.4133	6.46183	14.7259	11.3603	26.1282	23.482	14.1227	18.1242	36.289	17.346	22.2031	36.3462	34.5691	25.752	3.82761	3.74659	3.41342	4.00621	3.77184	4.5666	4.45613	3.97422	4.20343	4.91045	4.15944	4.40439	4.91324	4.85806
B5M07_05075	CP020694 (Chromosome)	1061376	1062143	-	hypothetical protein	8	3	1	22	40	36	9	4	27	128	134	130	172	132	44	30.644	10.4133	3.23092	23.1407	45.441	29.3942	12.4317	7.06137	32.6236	43.8207	61.1675	47.3181	39.5668	65.1875	35.409	4.88222	3.9639	3.32016	4.60931	5.2924	4.84593	4.04358	3.62042	4.95033	5.25926	5.6133	5.34006	5.15296	5.68168
B5M07_05080	CP020694 (Chromosome)	1062140	1063054	-	permease	10	7	3	47	25	55	29	35	27	149	126	215	190	105	44	38.3051	24.2978	9.69275	49.4369	28.4007	44.9078	40.0576	61.787	32.6236	51.01	57.5157	78.2569	43.7075	51.8537	35.409	5.28386	4.86238	4.15086	5.54091	4.9884	5.44287	5.32688	5.76985	5.12329	5.57501	5.6998	6.02663	5.41584	5.59163
B5M07_05085	CP020694 (Chromosome)	1063169	1064137	-	sugar ABC transporter permease	10	10	6	78	55	85	35	34	55	339	373	385	307	184	178	38.3051	34.7111	19.3855	82.0442	62.4814	69.403	48.3453	60.0216	66.4555	116.056	170.265	140.134	70.6221	90.8675	143.246	5.56452	5.47354	4.98933	6.30109	6.02279	6.12915	5.76904	5.98339	6.08516	6.66717	7.08119	6.86961	6.14688	6.40815
B5M07_05090	CP020694 (Chromosome)	1064173	1065333	-	sugar ABC transporter permease	13	12	27	137	73	117	91	41	82	634	714	612	673	493	376	49.7966	41.6533	87.2347	144.103	82.9299	95.5312	125.698	72.379	99.0791	217.049	325.922	222.759	154.817	243.466	302.586	6.10334	5.94606	6.62101	7.12626	6.56606	6.706	6.98498	6.43561	6.74321	7.56029	8.00261	7.58818	7.20164	7.6839
B5M07_05095	CP020694 (Chromosome)	1065335	1066954	-	heme ABC transporter ATP-binding protein	3	11	5	43	35	45	23	29	41	317	318	369	478	276	172	11.4915	38.1822	16.1546	45.2295	39.7609	36.7428	31.7698	51.1949	49.5396	108.525	145.159	134.311	109.959	136.301	138.417	4.52024	5.4608	4.73325	5.61343	5.48717	5.4086	5.27426	5.73807	5.70437	6.52164	6.83687	6.75237	6.53615	6.76792
B5M07_05100	CP020694 (Chromosome)	1067090	1068091	-	BMP family ABC transporter substrate-binding protein	12	17	8	252	204	247	146	48	175	390	383	359	495	394	122	45.9661	59.0089	25.8473	265.066	231.749	201.677	201.669	84.7364	211.449	133.516	174.829	130.671	113.87	194.575	98.1795	6.01911	6.23933	5.54276	7.76569	7.61992	7.47105	7.47022	6.57719	7.52117	7.03665	7.3194	7.01429	6.87239	7.43318
B5M07_05105	CP020694 (Chromosome)	1068199	1068654	-	ribosomal-protein-alanine acetyltransferase	3	0	1	0	2	4	0	0	0	9	31	27	22	20	9	11.4915	0	3.23092	0	2.27205	3.26602	0	0	0	3.08114	14.1507	9.82761	5.06087	9.8769	7.24275	2.71541	0.987503	1.70657	0.515228	1.45654	1.71182	0.625933	0.725197	0.571531	1.6629	3.10047	2.73328	2.10049	2.73118
B5M07_05110	CP020694 (Chromosome)	1068651	1069274	-	tRNA (adenosine(37)-N6)-threonylcarbamoyltransferase complex dimerization subunit type 1 TsaB	3	0	1	8	15	1	3	1	1	37	57	57	42	41	38	11.4915	0	3.23092	8.41479	17.0404	0.816506	4.14388	1.76534	1.20828	12.6669	26.019	20.7472	9.66166	20.2476	30.5805	3.31086	1.8467	2.42005	3.05365	3.73899	1.54531	2.47738	2.02593	1.7851	3.4554	4.19991	3.96213	3.18901	3.93327
B5M07_05115	CP020694 (Chromosome)	1069267	1069827	-	NifU family protein	18	31	46	49	33	64	30	31	35	203	354	554	356	347	170	68.9491	107.604	148.622	51.5406	37.4889	52.2564	41.4388	54.7256	42.2899	69.4968	161.592	201.648	81.894	171.364	136.808	6.18928	6.63953	6.9805	5.89748	5.59649	5.90982	5.6916	5.95875	5.70927	6.19237	7.07711	7.31786	6.35994	7.1405
B5M07_05120	CP020694 (Chromosome)	1069964	1070422	-	universal stress protein	1	0	1	17	21	29	6	1	12	41	20	47	85	20	12	3.83051	0	3.23092	17.8814	23.8566	23.6787	8.28777	1.76534	14.4994	14.0363	9.12948	17.1073	19.5534	9.8769	9.657	2.69936	2.05121	2.58734	3.88781	4.18216	4.18068	3.1589	2.19551	3.6771	3.65575	3.23933	3.85441	3.99354	3.31343
B5M07_05125	CP020694 (Chromosome)	1070520	1071398	-	branched chain amino acid aminotransferase	1	2	1	14	10	13	5	2	12	118	46	74	136	64	37	3.83051	6.94222	3.23092	14.7259	11.3603	10.6146	6.90647	3.53068	14.4994	40.3972	20.9978	26.9349	31.2854	31.6061	29.7758	2.95009	3.26925	2.83621	3.86096	3.61773	3.55218	3.19706	2.76328	3.84595	4.90594	4.21695	4.47528	4.63466	4.64161
B5M07_05130	CP020694 (Chromosome)	1071409	1071639	-	hypothetical protein	0	4	0	4	3	2	0	8	0	23	12	10	42	14	1	0	13.8844	0	4.2074	3.40808	1.63301	0	14.1227	0	7.87402	5.47769	3.63986	9.66166	6.91383	0.80475	1.09563	2.96792	1.03198	1.95837	1.79102	1.28177	0.693522	3.0659	0.639046	2.55104	2.20333	1.84408	2.75799	2.41907
B5M07_05135	CP020694 (Chromosome)	1071798	1072538	+	peptidase M48	1	10	8	8	8	3	4	5	10	16	5	10	35	11	10	3.83051	34.7111	25.8473	8.41479	9.08821	2.44952	5.52518	8.82671	12.0828	5.47758	2.28237	3.63986	8.05138	5.43229	8.0475	2.46853	4.38881	4.07436	3.00729	3.07763	2.02651	2.64622	3.04541	3.34764	2.61651	1.93087	2.27015	2.97062	2.61287
B5M07_05140	CP020694 (Chromosome)	1072543	1072899	+	hypothetical protein	0	2	1	4	2	2	0	2	2	1	0	3	33	13	0	0	6.94222	3.23092	4.2074	2.27205	1.63301	0	3.53068	2.41656	0.342349	0	1.09196	7.5913	6.41998	0	0.498351	1.81302	1.21981	1.52573	1.04289	0.826949	0.12253	1.3414	1.08402	0.0375958	-0.235578	0.557621	2.1333	1.95181
B5M07_05145	CP020694 (Chromosome)	1072896	1073516	-	hemolysin III	37	46	99	105	219	372	152	87	148	12	22	45	35	7	17	141.729	159.671	319.861	110.444	248.79	303.74	209.957	153.585	178.826	4.10819	10.0424	16.3793	8.05138	3.45691	13.6808	6.82006	6.95191	7.73324	6.55955	7.45511	7.68248	7.26354	6.91545	7.08545	3.63374	4.27258	4.67484	4.08289	3.56324
B5M07_05150	CP020694 (Chromosome)	1073586	1073969	-	hypothetical protein	38	36	42	23	24	35	17	49	3	20	25	43	24	9	6	145.559	124.96	135.698	24.1925	27.2646	28.5777	23.482	86.5018	3.62485	6.84698	11.4118	15.6514	5.52095	4.4446	4.8285	6.4915	6.31885	6.41567	4.56423	4.68493	4.73442	4.534	5.91814	3.00028	3.37393	3.83343	4.13141	3.18345	3.04372
B5M07_05155	CP020694 (Chromosome)	1074110	1075000	-	LysR family transcriptional regulator	0	1	6	15	0	13	2	1	1	0	3	1	2	1	2	0	3.47111	19.3855	15.7777	0	10.6146	2.76259	1.76534	1.20828	0	1.36942	0.363986	0.460079	0.493845	1.6095	0.500245	1.29442	3.00993	2.92687	0.017613	2.517	1.20557	0.899634	0.675716	-0.438914	0.700843	-0.00162797	0.0268219	0.162592
B5M07_05160	CP020694 (Chromosome)	1075096	1075590	+	glyoxalase	0	0	0	0	0	1	0	1	0	5	0	0	1	2	0	0	0	0	0	0	0.816506	0	1.76534	0	1.71174	0	0	0.230039	0.98769	0	-1.06981	-1.0932	-1.11023	-1.37673	-1.35845	-0.992674	-1.31202	-0.778818	-1.3438	-0.597328	-1.49954	-1.51367	-1.33325	-0.896093
B5M07_05165	CP020694 (Chromosome)	1075607	1076980	-	ribosomal protein S12 methylthiotransferase	11	25	18	43	36	58	22	20	31	159	90	93	278	99	49	42.1356	86.7778	58.1565	45.2295	40.8969	47.3573	30.3885	35.3068	37.4567	54.4335	41.0826	33.8507	63.951	48.8906	39.4328	5.43271	6.16913	5.75334	5.50138	5.40041	5.54801	5.11136	5.25746	5.31345	5.69148	5.40403	5.21054	5.85968	5.58073
B5M07_05170	CP020694 (Chromosome)	1077043	1078980	+	cell envelope biogenesis protein AsmA	16	11	6	43	21	25	32	36	37	50	20	38	80	61	23	61.2881	38.1822	19.3855	45.2295	23.8566	20.4126	44.2014	63.5523	44.7064	17.1174	9.12948	13.8314	18.4032	30.1245	18.5093	5.5876	5.09868	4.45569	5.28629	4.63786	4.48551	5.26018	5.64244	5.27312	4.31219	3.74652	4.11228	4.38042	4.86974
B5M07_05175	CP020694 (Chromosome)	1079077	1080309	+	tryptophan synthase subunit beta	10	8	4	48	40	59	23	20	18	153	131	125	269	95	54	38.3051	27.7689	12.9237	50.4888	45.441	48.1739	31.7698	35.3068	21.7491	52.3794	59.7981	45.4982	61.8806	46.9153	43.4565	5.27304	4.97041	4.33783	5.55296	5.4447	5.50519	5.08767	5.19181	4.72714	5.59314	5.7313	5.44733	5.76829	5.47865
B5M07_05180	CP020694 (Chromosome)	1080744	1081010	+	tryptophan synthase subunit beta	0	2	0	0	0	0	2	0	0	4	4	18	2	1	0	0	6.94222	0	0	0	0	2.76259	0	0	1.3694	1.8259	6.55174	0.460079	0.493845	0	-0.23215	1.13743	-0.297278	-0.699958	-0.681334	-0.76125	0.532675	-0.528524	-0.666458	0.11999	0.312652	1.42189	-0.481294	-0.415947
B5M07_05185	CP020694 (Chromosome)	1081050	1081316	+	tryptophan synthase subunit beta	0	0	0	1	0	0	0	0	0	2	22	31	8	1	0	0	0	0	1.05185	0	0	0	0	0	0.684698	10.0424	11.2836	1.84032	0.493845	0	-0.161864	-0.20131	-0.230021	0.00637107	-0.627325	-0.717233	-0.570244	-0.472021	-0.610705	-0.233796	1.9525	2.08306	0.42023	-0.366359
B5M07_05190	CP020694 (Chromosome)	1081356	1081622	+	tryptophan synthase subunit beta	0	0	0	0	0	0	0	0	0	2	12	35	0	3	0	0	0	0	0	0	0	0	0	0	0.684698	5.47769	12.7395	0	1.48153	0	-0.50341	-0.541095	-0.568523	-0.991631	-0.968319	-1.05101	-0.893547	-0.799712	-0.944733	-0.51757	1.02612	1.645	-1.32559	-0.0532891
B5M07_05195	CP020694 (Chromosome)	1081826	1082359	+	LuxR family transcriptional regulator	8	0	0	1	3	15	0	3	5	108	123	209	127	60	51	30.644	0	0	1.05185	3.40808	12.2476	0	5.29603	6.04141	36.9737	56.1463	76.073	29.215	29.6307	41.0423	4.50074	2.1914	2.15429	1.96893	2.56278	3.61092	1.71229	2.91238	2.98665	4.76391	5.22299	5.56643	4.51129	4.52178
B5M07_05200	CP020694 (Chromosome)	1082375	1082953	-	DUF4893 domain-containing protein	4	12	8	16	17	48	21	25	22	14	7	11	24	5	16	15.322	41.6533	25.8473	16.8296	19.3124	39.1923	29.0072	44.1336	26.5822	4.79288	3.19532	4.00384	5.52095	2.46922	12.876	3.89081	4.89502	4.3973	3.98965	4.12592	4.86939	4.54056	4.98352	4.45171	2.83553	2.53741	2.69366	2.94549	2.36948
B5M07_05205	CP020694 (Chromosome)	1082956	1083339	-	hypothetical protein	7	1	10	12	11	24	13	4	17	11	8	14	8	9	4	26.8135	3.47111	32.3092	12.6222	12.4963	19.5961	17.9568	7.06137	20.5408	3.76584	3.65179	5.0958	1.84032	4.4446	3.219	4.17929	2.51476	4.3936	3.4699	3.45887	3.91905	3.81652	2.93846	3.95905	2.37436	2.35947	2.62991	1.82362	2.5207
B5M07_05210	CP020694 (Chromosome)	1083356	1084531	-	6-aminohexanoate hydrolase	14	15	24	44	53	69	48	29	67	51	29	39	60	31	23	53.6271	52.0667	77.542	46.2814	60.2094	56.3389	66.3022	51.1949	80.9549	17.4598	13.2377	14.1954	13.8024	15.3092	18.5093	5.55823	5.52937	5.9496	5.41704	5.69187	5.62331	5.79288	5.51891	6.0083	4.45244	4.20242	4.26224	4.23263	4.33442
B5M07_05215	CP020694 (Chromosome)	1084637	1085350	-	aminoacyl-tRNA hydrolase	0	2	0	9	0	5	5	5	3	11	9	12	18	12	1	0	6.94222	0	9.46664	0	4.08253	6.90647	8.82671	3.62485	3.76584	4.10826	4.36783	4.14071	5.92614	0.80475	1.12945	2.32025	1.06703	2.69533	0.661336	1.9493	2.38569	2.59679	1.85381	1.88619	1.95858	2.01233	1.96816	2.27938
B5M07_05220	CP020694 (Chromosome)	1085533	1086189	-	50S ribosomal protein L25/general stress protein Ctc	6	18	14	78	79	289	31	27	35	227	139	152	498	84	65	22.983	62.48	45.2328	82.0442	89.7461	235.97	42.8201	47.6642	42.2899	77.7132	63.4499	55.3258	114.56	41.483	52.3088	5.05623	5.96503	5.64915	6.24637	6.34033	7.39405	5.58897	5.69506	5.57604	6.19095	5.98084	5.84099	6.60271	5.55365
B5M07_05225	CP020694 (Chromosome)	1086302	1086922	-	hypothetical protein	5	9	2	17	6	10	8	13	7	65	76	77	136	57	61	19.1525	31.24	6.46183	17.8814	6.81616	8.16506	11.0504	22.9494	8.45797	22.2527	34.692	28.0269	31.2854	28.1492	49.0898	4.25231	4.72485	3.40518	4.18658	3.342	3.4723	3.74731	4.42871	3.51696	4.40382	4.86061	4.63928	4.75457	4.64275
B5M07_05230	CP020694 (Chromosome)	1086916	1088106	-	L-lactate dehydrogenase (cytochrome)	3	1	5	14	26	22	18	17	22	133	100	114	215	142	85	11.4915	3.47111	16.1546	14.7259	29.5367	17.9631	24.8633	30.0108	26.5822	45.5324	45.6474	41.4943	49.4585	70.126	68.4038	4.06422	3.39216	4.3181	4.20163	4.86485	4.38075	4.69529	4.88012	4.76034	5.31258	5.31454	5.21513	5.40061	5.77296
B5M07_05235	CP020694 (Chromosome)	1088245	1089036	-	tryptophan synthase subunit alpha	0	5	9	24	16	34	9	0	8	42	16	26	133	33	10	0	17.3556	29.0782	25.2444	18.1764	27.7612	12.4317	0	9.66626	14.3787	7.30358	9.46362	30.5952	16.2969	8.0475	2.27276	3.93145	4.44916	4.33635	3.99983	4.43957	3.63038	1.88408	3.39979	3.77368	3.13558	3.37035	4.55228	3.8972
B5M07_05240	CP020694 (Chromosome)	1089191	1089382	+	hypothetical protein	0	6	2	1	15	21	0	1	1	4	17	12	11	0	3	0	20.8267	6.46183	1.05185	17.0404	17.1466	0	1.76534	1.20828	1.3694	7.76005	4.36783	2.53043	0	2.41425	1.03087	3.40022	2.22866	1.03215	3.29558	3.31893	0.617539	1.34827	1.11604	1.05664	2.51985	1.97791	1.50413	0.18614
B5M07_05245	CP020694 (Chromosome)	1089442	1090539	+	redox-regulated ATPase YchF	1	11	7	18	20	64	7	7	11	84	76	114	160	55	31	3.83051	38.1822	22.6164	18.9333	22.7205	52.2564	9.66906	12.3574	13.2911	28.7573	34.692	41.4943	36.8063	27.1615	24.9473	3.3113	5.02123	4.50893	4.33571	4.51257	5.37259	3.74246	3.95738	4.00993	4.75047	4.94318	5.13131	5.00641	4.69176
B5M07_05250	CP020694 (Chromosome)	1090624	1090926	-	hypothetical protein	8	10	34	22	42	79	6	23	7	6	34	42	10	5	8	30.644	34.7111	109.851	23.1407	47.7131	64.504	8.28777	40.6029	8.45797	2.05409	15.5201	15.2874	2.30039	2.46922	6.438	4.63929	4.77286	6.05467	4.379	5.1444	5.48117	3.41799	4.96104	3.42945	2.29422	3.97994	3.9648	2.33744	2.44723
B5M07_05255	CP020694 (Chromosome)	1091361	1091450	+	#N/A	0	0	0	0	0	0	0	0	0	0	1	0	0	0	0	0	0	0	0	0	0	0	0	0	0	0.456474	0	0	0	0	-2.16142	-2.16488	-2.1674	-2.20686	-2.20415	-2.21576	-2.19728	-2.18865	-2.20198	-2.23918	-2.16589	-2.23911	-2.23956	-2.23344
B5M07_05260	CP020694 (Chromosome)	1092049	1093635	+	gamma-glutamyltransferase	19	6	8	13	5	7	5	10	17	65	39	49	74	22	14	72.7796	20.8267	25.8473	13.674	5.68013	5.71554	6.90647	17.6534	20.5408	22.2527	17.8025	17.8353	17.0229	10.8646	11.2665	5.54935	4.2371	4.45041	3.84394	3.09778	3.08231	3.25969	4.08705	4.23818	4.32554	4.09959	4.10175	4.05562	3.62331
B5M07_05265	CP020694 (Chromosome)	1093734	1093955	-	hypothetical protein	0	1	0	0	0	0	0	0	0	2	0	0	0	0	0	0	3.47111	0	0	0	0	0	0	0	0.684698	0	0	0	0	0	-1.74784	-1.36173	-1.7824	-2.01028	-1.99465	-2.06171	-1.95495	-1.90514	-1.98212	-1.64629	-2.17978	-2.19738	-2.21817	-2.16381
B5M07_05270	CP020694 (Chromosome)	1094282	1094356	+	#N/A	0	0	0	0	0	0	0	0	1	2	0	0	1	0	0	0	0	0	0	0	0	0	0	1.20828	0.684698	0	0	0.230039	0	0	-1.69647	-1.70926	-1.71857	-1.86424	-1.85425	-1.89712	-1.82887	-1.79703	-1.58662	-1.64055	-1.95923	-1.96333	-1.84171	-1.95765
B5M07_05275	CP020694 (Chromosome)	1094475	1096619	-	hypothetical protein	9	10	11	59	23	33	18	4	43	199	121	152	498	250	202	34.4745	34.7111	35.5401	62.0591	26.1286	26.9447	24.8633	7.06137	51.9561	68.1274	55.2333	55.3258	114.56	123.461	162.56	5.26509	5.26988	5.29103	5.84603	4.98748	5.01304	4.94422	3.9688	5.66253	5.94565	5.72633	5.7282	6.50373	6.58433
B5M07_05280	CP020694 (Chromosome)	1097071	1100466	+	hypothetical protein	15	24	3	153	92	145	141	80	135	619	516	613	1308	650	480	57.4576	83.3067	9.69275	160.933	104.514	118.393	194.763	141.227	163.118	211.914	235.54	223.123	300.892	320.999	386.28	6.30366	6.64404	5.04716	7.29892	6.8592	6.98403	7.49841	7.16414	7.31289	7.58867	7.7013	7.64353	7.96586	8.03598
B5M07_05285	CP020694 (Chromosome)	1101123	1101392	+	hypothetical protein	2	0	0	0	0	0	0	0	0	0	0	2	7	0	0	7.66101	0	0	0	0	0	0	0	0	0	0	0.727971	1.61028	0	0	0.0897834	-1.17956	-1.20177	-1.54933	-1.52549	-1.62777	-1.46494	-1.38897	-1.50639	-1.79925	-1.7604	-1.05301	-0.527276	-1.74926
B5M07_05290	CP020694 (Chromosome)	1101379	1102455	+	hypothetical protein	0	1	3	4	1	6	3	1	1	4	26	14	38	24	5	0	3.47111	9.69275	4.2074	1.13603	4.89904	4.14388	1.76534	1.20828	1.3694	11.8683	5.0958	8.7415	11.8523	4.02375	1.25645	1.93486	2.71835	2.05623	1.26419	2.18393	2.04383	1.52523	1.30017	1.22416	3.02566	2.22533	2.73364	3.02265
B5M07_05295	CP020694 (Chromosome)	1102650	1103093	+	hypothetical protein	0	0	0	0	0	2	0	1	0	0	0	0	6	0	0	0	0	0	0	0	1.63301	0	1.76534	0	0	0	0	1.38024	0	0	-1.2705	-1.29217	-1.30794	-1.55477	-1.53783	-0.858847	-1.49484	-1.00098	-1.52427	-1.70385	-1.68821	-1.70073	-0.890382	-1.6835
B5M07_05300	CP020694 (Chromosome)	1103835	1104128	+	transposase	0	0	0	0	0	0	0	0	0	0	0	0	0	0	0	0	0	0	0	0	0	0	0	0	0	0	0	0	0	0	0	0	0	0	0	0	0	0	0	0	0	0	0	0
B5M07_05305	CP020694 (Chromosome)	1104137	1105030	+	hypothetical protein	0	0	0	0	0	0	0	0	0	0	0	0	0	0	0	0	0	0	0	0	0	0	0	0	0	0	0	0	0	0	0	0	0	0	0	0	0	0	0	0	0	0	0	0
B5M07_05310	CP020694 (Chromosome)	1105193	1106092	-	hypothetical protein	4	1	0	13	7	7	5	5	17	68	45	64	158	99	61	15.322	3.47111	0	13.674	7.95218	5.71554	6.90647	8.82671	20.5408	23.2797	20.5413	23.2951	36.3462	48.8906	49.0898	3.9136	2.90865	2.33914	3.80808	3.32248	3.03823	3.21614	3.42607	4.20525	4.3413	4.21181	4.34174	4.81161	5.12816
B5M07_05315	CP020694 (Chromosome)	1106961	1108472	-	aldehyde dehydrogenase (NADP(+))	5	1	0	6	3	8	6	0	1	70	45	64	65	29	9	19.1525	3.47111	0	6.31109	3.40808	6.53205	8.28777	0	1.20828	23.9644	20.5413	23.2951	14.9526	14.3215	7.24275	3.76651	2.42918	1.76901	2.77031	2.2948	2.79748	3.01043	1.48103	1.75197	4.08879	3.92286	4.05811	3.59971	3.5497
B5M07_05320	CP020694 (Chromosome)	1108469	1109476	-	4-hydroxythreonine-4-phosphate dehydrogenase	6	1	0	2	3	4	2	0	0	56	26	27	36	17	8	22.983	3.47111	0	2.1037	3.40808	3.26602	2.76259	0	0	19.1715	11.8683	9.82761	8.28142	8.39536	6.438	3.70678	2.0847	1.35873	1.68692	2.01418	1.97058	1.88002	1.09541	0.927882	3.64143	3.14105	2.95552	2.79164	2.79694
B5M07_05325	CP020694 (Chromosome)	1109479	1110210	-	transcriptional regulator	0	2	2	0	4	3	3	1	2	25	10	21	32	15	15	0	6.94222	6.46183	0	4.5441	2.44952	4.14388	1.76534	2.41656	8.55872	4.56474	7.6437	7.36126	7.40767	12.0713	1.33128	2.47251	2.41974	0.803449	2.16508	1.70072	2.09322	1.58442	1.71586	2.74759	2.17057	2.63894	2.60764	2.60525
B5M07_05330	CP020694 (Chromosome)	1110212	1111123	-	dihydrodipicolinate synthase family protein	1	2	8	2	2	1	4	2	0	3	5	5	0	9	6	3.83051	6.94222	25.8473	2.1037	2.27205	0.816506	5.52518	3.53068	0	1.02705	2.28237	1.81993	0	4.4446	4.8285	1.62404	2.10373	3.50778	1.24373	1.29751	0.708869	2.00227	1.61104	0.357367	0.729297	1.28778	1.11313	-0.257366	1.8497
B5M07_05335	CP020694 (Chromosome)	1111120	1112295	-	L-rhamnonate dehydratase	8	2	11	9	4	7	8	8	1	11	6	17	1	4	4	30.644	6.94222	35.5401	9.46664	4.5441	5.71554	11.0504	14.1227	1.20828	3.76584	2.73884	6.18775	0.230039	1.97538	3.219	4.12598	2.6684	4.31211	2.9851	2.32717	2.51908	3.12761	3.36214	1.52371	2.14743	1.89677	2.59257	0.588403	1.66504
B5M07_05340	CP020694 (Chromosome)	1112539	1113519	+	C4-dicarboxylate ABC transporter	0	5	8	16	23	25	5	6	5	13	6	9	5	4	3	0	17.3556	25.8473	16.8296	26.1286	20.4126	6.90647	10.5921	6.04141	4.45054	2.73884	3.27587	1.1502	1.97538	2.41425	1.70544	3.59687	4.0242	3.63349	4.09761	3.84301	2.7659	3.15232	2.64977	2.37052	1.98421	2.11488	1.35254	1.75884
B5M07_05345	CP020694 (Chromosome)	1113579	1114142	+	C4-dicarboxylate ABC transporter substrate-binding protein	0	1	0	2	6	9	1	0	3	1	6	4	1	7	1	0	3.47111	0	2.1037	6.81616	7.34855	1.38129	0	3.62485	0.342349	2.73884	1.45594	0.230039	3.45691	0.80475	0.441156	1.19249	0.369625	0.93747	1.89202	1.98888	0.694301	0.149702	1.33105	0.010381	1.14958	0.694888	-0.149401	1.33641
B5M07_05350	CP020694 (Chromosome)	1114139	1115419	+	C4-dicarboxylate ABC transporter permease	5	0	4	6	13	14	10	13	19	9	10	13	33	18	6	19.1525	0	12.9237	6.31109	14.7683	11.4311	13.8129	22.9494	22.9574	3.08114	4.56474	4.73181	7.5913	8.88921	4.8285	3.83214	1.92072	3.46503	2.84114	3.62514	3.37935	3.55505	4.06097	4.07403	2.22896	2.55065	2.57575	2.99354	3.14221
B5M07_05355	CP020694 (Chromosome)	1115825	1116886	+	spermidine/putrescine ABC transporter substrate-binding protein	42	65	83	315	199	241	174	70	250	132	144	186	341	470	301	160.881	225.622	268.166	331.332	226.069	196.778	240.345	123.574	302.07	45.1901	65.7322	67.7013	78.4434	232.107	242.23	7.33401	7.68565	7.86952	8.10051	7.68974	7.54361	7.75455	7.0658	8.00001	6.10153	6.44693	6.47421	6.61436	7.71829
B5M07_05360	CP020694 (Chromosome)	1116948	1118033	+	spermidine/putrescine ABC transporter ATP-binding protein	11	7	16	86	64	93	58	5	62	57	58	110	131	157	103	42.1356	24.2978	51.6947	90.459	72.7057	75.9351	80.1151	8.82671	74.9135	19.5139	26.4755	40.0384	30.1352	77.5336	82.8893	5.4382	4.93088	5.63978	6.23018	5.99711	6.04431	6.09899	4.09564	6.02846	4.68712	4.97635	5.38289	5.09994	6.06771
B5M07_05365	CP020694 (Chromosome)	1118033	1118890	+	spermidine/putrescine ABC transporter permease	2	1	1	41	40	63	20	16	44	61	53	72	111	83	49	7.66101	3.47111	3.23092	43.1258	45.441	51.4399	27.6259	28.2455	53.1644	20.8833	24.1931	26.207	25.5344	40.9891	39.4328	3.72024	3.30577	3.25813	5.20286	5.25723	5.39117	4.74516	4.76645	5.42314	4.46731	4.61347	4.6937	4.66756	5.15344
B5M07_05370	CP020694 (Chromosome)	1118895	1119746	+	ABC transporter permease	14	6	1	62	62	69	16	7	39	41	48	97	106	61	47	53.6271	20.8267	3.23092	65.2146	70.4336	56.3389	22.1007	12.3574	47.123	14.0363	21.9107	35.3066	24.3842	30.1245	37.8233	5.47545	4.55575	3.36742	5.70234	5.78479	5.54737	4.59651	4.08333	5.35618	4.15736	4.58225	5.06068	4.68644	4.89865
B5M07_05375	CP020694 (Chromosome)	1119784	1120350	-	replication protein	2	0	0	1	2	5	3	1	3	8	4	13	13	3	1	7.66101	0	0	1.05185	2.27205	4.08253	4.14388	1.76534	3.62485	2.73879	1.8259	4.73181	2.99051	1.48153	0.80475	2.0366	0.671837	0.641069	0.793323	1.20939	1.65047	1.6381	1.07289	1.53976	1.34774	1.05519	1.79862	1.4197	0.923833
B5M07_05380	CP020694 (Chromosome)	1120387	1121322	-	class II glutamine amidotransferase	0	1	0	6	7	39	3	4	2	33	37	26	25	10	9	0	3.47111	0	6.31109	7.95218	31.8437	4.14388	7.06137	2.41656	11.2975	16.8895	9.46362	5.75099	4.93845	7.24275	1.68162	2.28955	1.6063	2.66599	2.87096	4.28799	2.33312	2.76076	1.96457	3.22157	3.62556	3.04725	2.58006	2.44904
B5M07_05385	CP020694 (Chromosome)	1121563	1121850	-	peptide-binding protein	0	0	0	0	0	8	0	0	5	19	12	17	23	1	15	0	0	0	0	0	6.53205	0	0	6.04141	6.50463	5.47769	6.18775	5.29091	0.493845	12.0713	0.697676	0.654291	0.622714	0.221193	0.249097	2.09033	0.319925	0.408045	1.99204	2.11858	1.94924	2.06963	1.93186	0.367766
B5M07_05390	CP020694 (Chromosome)	1121912	1124332	-	hybrid sensor histidine kinase/response regulator	11	6	13	128	273	415	50	18	55	330	589	640	395	239	154	42.1356	20.8267	42.0019	134.637	310.135	338.85	69.0647	31.7762	66.4555	112.975	268.863	232.951	90.8656	118.029	123.932	5.83158	5.25976	5.82315	6.96126	7.86554	7.96494	6.27968	5.56068	6.24122	6.77823	7.70895	7.55163	6.55343	6.82377
B5M07_05395	CP020694 (Chromosome)	1124521	1125669	-	phosphonate metabolism protein PhnM	3	2	5	8	8	8	10	17	7	18	17	20	25	19	11	11.4915	6.94222	16.1546	8.41479	9.08821	6.53205	13.8129	30.0108	8.45797	6.16228	7.76005	7.27971	5.75099	9.38305	8.85225	3.40185	3.00456	3.71822	3.13552	3.20472	2.91165	3.59412	4.3785	3.14093	2.84877	3.05765	2.99833	2.78414	3.23336
B5M07_05400	CP020694 (Chromosome)	1125717	1126394	+	phosphonate metabolism protein	1	0	1	0	2	2	0	2	2	8	6	5	11	4	1	3.83051	0	3.23092	0	2.27205	1.63301	0	3.53068	2.41656	2.73879	2.73884	1.81993	2.53043	1.97538	0.80475	1.24194	0.415	1.15204	0.0238399	0.987475	0.783428	0.103371	1.2724	1.02655	1.14883	1.14361	0.850517	1.09279	0.905485
B5M07_05405	CP020694 (Chromosome)	1126370	1126918	-	phosphonate metabolism protein/1,5-bisphosphokinase (PRPP-forming) PhnN	4	0	1	1	2	3	0	6	3	13	7	6	9	12	2	15.322	0	3.23092	1.05185	2.27205	2.44952	0	10.5921	3.62485	4.45054	3.19532	2.18391	2.07035	5.92614	1.6095	2.93291	0.8976	1.62563	0.970989	1.39082	1.43361	0.555036	2.66057	1.72458	1.91849	1.63371	1.33589	1.28925	2.17122
B5M07_05410	CP020694 (Chromosome)	1126915	1127598	-	phosphonate C-P lyase system protein PhnL	3	4	3	2	3	4	8	3	4	3	6	8	12	6	5	11.4915	13.8844	9.69275	2.1037	3.40808	3.26602	11.0504	5.29603	4.83313	1.02705	2.73884	2.91188	2.76047	2.96307	4.02375	2.90453	3.1033	2.76464	1.60868	1.93598	1.89625	2.95659	2.27784	2.20874	1.09314	1.74811	1.79074	1.74123	1.81032
B5M07_05415	CP020694 (Chromosome)	1127670	1128440	-	phosphonate C-P lyase system protein PhnK	5	5	4	7	0	2	8	11	20	9	14	9	21	5	15	19.1525	17.3556	12.9237	7.36294	0	1.63301	11.0504	19.4188	24.1656	3.08114	6.39063	3.27587	4.83083	2.46922	12.0713	3.71865	3.6274	3.3437	2.85675	1.19235	1.74768	3.23099	3.78798	4.03492	2.10115	2.72757	2.15167	2.47177	1.95278
B5M07_05420	CP020694 (Chromosome)	1128437	1129306	-	carbon-phosphorus lyase	3	4	3	2	1	0	6	2	9	10	20	6	19	11	15	11.4915	13.8844	9.69275	2.1037	1.13603	0	8.28777	3.53068	10.8745	3.42349	9.12948	2.18391	4.37075	5.43229	12.0713	3.01082	3.20495	2.86997	1.71209	1.41783	0.793227	2.77399	2.08008	3.03859	2.00806	2.89192	1.66303	2.21263	2.40597
B5M07_05425	CP020694 (Chromosome)	1129354	1130454	-	carbon-phosphorus lyase complex subunit PhnI	3	0	8	4	1	10	8	17	6	22	16	24	14	10	5	11.4915	0	25.8473	4.2074	1.13603	8.16506	11.0504	30.0108	7.24969	7.53168	7.30358	8.73565	3.22055	4.93845	4.02375	3.21027	1.70683	4.03639	2.37936	1.6394	2.9422	3.21932	4.23864	2.83197	2.87019	2.84093	3.01099	2.11951	2.49074
B5M07_05430	CP020694 (Chromosome)	1130454	1131014	-	phosphonate C-P lyase system protein PhnH	4	3	10	2	0	1	1	6	3	6	6	1	3	3	6	15.322	10.4133	32.3092	2.1037	0	0.816506	1.38129	10.5921	3.62485	2.05409	2.73884	0.363986	0.690118	1.48153	4.8285	3.01225	2.62325	3.89511	1.35539	0.455949	0.816197	1.13688	2.7321	1.75987	1.29737	1.53231	0.353715	0.553661	1.07718
B5M07_05435	CP020694 (Chromosome)	1131014	1131472	-	phosphonate C-P lyase system protein PhnG	1	0	2	0	0	3	0	3	3	4	4	1	2	0	0	3.83051	0	6.46183	0	0	2.44952	0	5.29603	3.62485	1.3694	1.8259	0.363986	0.460079	0	0	0.768151	-0.0738388	1.28811	-0.50547	-0.484455	0.675496	-0.431458	1.23963	0.957476	0.28592	0.48307	-0.382884	-0.326867	-0.70797
B5M07_05440	CP020694 (Chromosome)	1131574	1132287	+	phosphonate metabolism transcriptional regulator PhnF	477	270	289	46	37	76	129	520	274	152	152	207	243	134	87	1827.15	937.2	933.735	48.3851	42.033	62.0545	178.187	917.978	331.069	52.037	69.384	75.345	55.8996	66.1752	70.0133	10.0452	9.27105	9.26709	6.17885	6.05575	6.40386	7.44872	9.24937	8.10869	6.2368	6.50643	6.58465	6.30172	6.46182
B5M07_05445	CP020694 (Chromosome)	1132284	1132898	-	chloramphenicol acetyltransferase	2	0	0	0	0	0	2	0	0	3	0	5	0	0	0	7.66101	0	0	0	0	0	2.76259	0	0	1.02705	0	1.81993	0	0	0	0.521091	-0.876991	-0.901453	-1.28426	-1.258	-1.37066	-0.0155496	-1.10763	-1.23697	-0.579395	-1.48607	-0.184735	-1.59318	-1.47239
B5M07_05450	CP020694 (Chromosome)	1132898	1134133	-	phosphonate ABC transporter, permease protein PhnE	2	2	0	2	2	1	1	0	0	2	1	1	1	9	0	7.66101	6.94222	0	2.1037	2.27205	0.816506	1.38129	0	0	0.684698	0.456474	0.363986	0.230039	4.4446	0	1.44363	1.37644	-0.0698903	0.576145	0.626089	0.023437	0.293729	-0.315232	-0.437284	-0.0987237	-0.258123	-0.360227	-0.550421	1.25278
B5M07_05455	CP020694 (Chromosome)	1134199	1135077	-	phosphonate ABC transporter, permease protein PhnE	5	0	0	0	0	1	0	0	0	2	4	2	3	1	0	19.1525	0	0	0	0	0.816506	0	0	0	0.684698	1.8259	0.727971	0.690118	0.493845	0	2.19662	-0.494985	-0.523473	-0.969295	-0.938711	-0.38645	-0.861051	-0.763591	-0.914214	-0.480864	0.18469	-0.44553	-0.478419	-0.635959
B5M07_05460	CP020694 (Chromosome)	1135151	1136059	-	phosphonate ABC transporter substrate-binding protein	0	1	1	0	1	6	0	0	0	1	1	0	4	6	1	0	3.47111	3.23092	0	1.13603	4.89904	0	0	0	0.342349	0.456474	0	0.920158	2.96307	0.80475	-0.276154	0.432158	0.405446	-0.734535	-0.0721512	1.03082	-0.656101	-0.564717	-0.703124	-0.596925	-0.482269	-0.962274	-0.16605	0.633124
B5M07_05465	CP020694 (Chromosome)	1136105	1136899	-	phosphonate ABC transporter ATP-binding protein	0	0	0	0	1	0	0	0	0	3	2	1	1	0	0	0	0	0	0	1.13603	0	0	0	0	1.02705	0.912948	0.363986	0.230039	0	0	-1.238	-1.25656	-1.27006	-1.48145	-1.09022	-1.52916	-1.43012	-1.38391	-1.45533	-1.05767	-1.10954	-1.36369	-1.44437	-1.57877
B5M07_05470	CP020694 (Chromosome)	1137334	1137588	+	hypothetical protein	2	4	6	2	6	12	3	2	3	5	1	0	0	4	2	7.66101	13.8844	19.3855	2.1037	6.81616	9.79807	4.14388	3.53068	3.62485	1.71174	0.456474	0	0	1.97538	1.6095	2.27679	2.88819	3.26797	1.33345	2.29652	2.67441	1.83958	1.70521	1.73409	1.14423	0.470936	-0.0205826	-0.183165	1.26054
B5M07_05475	CP020694 (Chromosome)	1137585	1138346	+	hypothetical protein	7	4	13	13	24	28	12	11	5	2	8	13	13	10	4	26.8135	13.8844	42.0019	13.674	27.2646	22.8622	16.5755	19.4188	6.04141	0.684698	3.65179	4.73181	2.99051	4.93845	3.219	4.23455	3.58429	4.73538	3.59972	4.3095	4.12963	3.78664	3.94052	2.85575	1.38803	2.4108	2.61601	2.22725	2.65973
B5M07_05480	CP020694 (Chromosome)	1138358	1138675	+	antibiotic biosynthesis monooxygenase	5	9	3	4	4	6	0	3	0	5	1	6	8	4	2	19.1525	31.24	9.69275	4.2074	4.5441	4.89904	0	5.29603	0	1.71174	0.456474	2.18391	1.84032	1.97538	1.6095	3.28817	3.86461	2.59746	1.92229	1.98647	2.06271	0.599186	2.10026	0.541987	1.19786	0.532487	1.38283	1.23926	1.31658
B5M07_05485	CP020694 (Chromosome)	1139020	1139184	+	hypothetical protein	1	0	0	0	0	0	0	0	0	0	0	0	0	0	0	3.83051	0	0	0	0	0	0	0	0	0	0	0	0	0	0	-1.6353	-2.04111	-2.05498	-2.27199	-2.2571	-2.32097	-2.2193	-2.17186	-2.24518	-2.48234	-2.43342	-2.4772	-2.50013	-2.4182
B5M07_05490	CP020694 (Chromosome)	1139311	1139739	+	hypothetical protein	0	1	2	0	1	1	0	4	2	7	7	14	4	4	17	0	3.47111	6.46183	0	1.13603	0.816506	0	7.06137	2.41656	2.39644	3.19532	5.0958	0.920158	1.97538	13.6808	0.713205	1.46559	1.94953	0.237822	0.82778	0.645565	0.336599	2.11248	1.26001	1.2552	1.48434	1.89707	0.594095	1.11268
B5M07_05495	CP020694 (Chromosome)	1139743	1140264	-	cell wall hydrolase	8	0	0	4	3	9	2	9	4	18	9	7	28	4	1	30.644	0	0	4.2074	3.40808	7.34855	2.76259	15.8881	4.83313	6.16228	4.10826	2.5479	6.4411	1.97538	0.80475	3.95116	1.24968	1.22054	2.08502	1.92139	2.58201	1.78095	3.31295	2.19866	2.43061	2.0634	1.66911	2.47555	1.49441
B5M07_05500	CP020694 (Chromosome)	1140449	1141138	+	GntR family transcriptional regulator	14	18	4	3	2	3	18	26	31	27	21	36	34	14	8	53.6271	62.48	12.9237	3.15555	2.27205	2.44952	24.8633	45.8989	37.4567	9.24342	9.58595	13.1035	7.82134	6.91383	6.438	5.13427	5.31171	3.69265	2.55068	2.37298	2.36183	4.34445	4.99531	4.78275	3.36944	3.40553	3.70613	3.2107	3.10818
B5M07_05505	CP020694 (Chromosome)	1141173	1142840	-	urocanate hydratase	21	23	31	15	14	11	23	40	24	11	11	20	25	13	18	80.4406	79.8356	100.158	15.7777	15.9044	8.98157	31.7698	70.6137	28.9988	3.76584	5.02121	7.27971	5.75099	6.41998	14.4855	5.75035	5.74586	6.00524	4.07003	4.07816	3.54971	4.76996	5.6279	4.67669	2.80796	3.04347	3.34575	3.13332	3.24662
B5M07_05510	CP020694 (Chromosome)	1142837	1143637	-	N-formylglutamate deformylase	21	25	37	3	3	3	9	24	4	2	3	3	20	8	9	80.4406	86.7778	119.544	3.15555	3.40808	2.44952	12.4317	42.3682	4.83313	0.684698	1.36942	1.09196	4.60079	3.95076	7.24275	5.47023	5.56672	5.94964	2.27583	2.33771	2.07534	3.46274	4.76961	2.60604	1.23861	1.6361	1.47472	2.51227	2.39822
B5M07_05515	CP020694 (Chromosome)	1143634	1145172	-	histidine ammonia-lyase	55	59	194	3	12	3	15	47	8	8	10	14	28	3	12	210.678	204.796	626.798	3.15555	13.6323	2.44952	20.7194	82.9711	9.66626	2.73879	4.56474	5.0958	6.4411	1.48153	9.657	6.86404	6.83326	8.18765	2.70355	3.88336	2.51053	4.2962	5.79657	3.56694	2.48055	2.88772	2.96836	3.16123	2.14676
B5M07_05520	CP020694 (Chromosome)	1145169	1146377	-	imidazolonepropionase	65	115	281	6	4	3	15	27	8	15	11	9	12	14	1	248.983	399.178	907.887	6.31109	4.5441	2.44952	20.7194	47.6642	9.66626	5.13523	5.02121	3.27587	2.76047	6.91383	0.80475	7.05564	7.6209	8.55045	3.19011	2.95189	2.52921	4.28505	5.16539	3.55557	2.97015	2.96278	2.63076	2.48957	3.23322
B5M07_05525	CP020694 (Chromosome)	1146464	1147822	+	formimidoylglutamate deiminase	131	116	357	6	7	9	21	62	34	15	12	27	20	17	15	501.796	402.649	1153.44	6.31109	7.95218	7.34855	29.0072	109.451	41.0816	5.13523	5.47769	9.82761	4.60079	8.39536	12.0713	8.0562	7.79437	9.06856	3.51106	3.69291	3.60877	4.87046	6.29207	5.22861	3.28065	3.34484	3.82617	3.17933	3.69618
B5M07_05530	CP020694 (Chromosome)	1147938	1148156	+	hypothetical protein	13	21	14	83	69	155	47	21	71	15	27	54	10	9	0	49.7966	72.8933	45.2328	87.3035	78.3858	126.558	64.9209	37.0722	85.788	5.13523	12.3248	19.6552	2.30039	4.4446	0	5.36162	5.77362	5.2651	5.99288	5.87307	6.41081	5.66471	5.06755	5.97214	3.23574	3.9876	4.43015	2.65037	3.14694
B5M07_05535	CP020694 (Chromosome)	1148280	1149269	+	glucokinase	7	3	3	18	31	58	10	5	6	19	15	24	34	16	8	26.8135	10.4133	9.69275	18.9333	35.2168	47.3573	13.8129	8.82671	7.24969	6.50463	6.84711	8.73565	7.82134	7.90152	6.438	4.34726	3.47037	3.41081	4.03343	4.67986	5.0075	3.72073	3.31796	3.14171	3.01964	3.06921	3.28694	3.18203	3.19788
B5M07_05540	CP020694 (Chromosome)	1149317	1150594	+	glycerate kinase	5	10	15	22	33	32	15	37	23	91	36	92	134	93	28	19.1525	34.7111	48.4637	23.1407	37.4889	26.1282	20.7194	65.3177	27.7905	31.1537	16.4331	33.4867	30.8253	45.9276	22.533	4.50833	5.0533	5.38994	4.65799	5.13614	4.77494	4.55564	5.71237	4.8364	4.94981	4.32783	5.02304	4.93913	5.34845
B5M07_05545	CP020694 (Chromosome)	1150612	1151700	-	zinc-binding dehydrogenase	4	4	7	11	13	6	14	13	17	57	46	82	114	46	37	15.322	13.8844	22.6164	11.5703	14.7683	4.89904	19.3381	22.9494	20.5408	19.5139	20.9978	29.8468	26.2245	22.7169	29.7758	4.04535	3.95984	4.39825	3.77279	3.99644	3.06574	4.25305	4.41894	4.3121	4.2632	4.33601	4.69478	4.56245	4.41482
B5M07_05550	CP020694 (Chromosome)	1151773	1152993	-	tetracycline resistance MFS efflux pump	7	8	10	26	29	27	23	19	31	60	69	80	61	27	7	26.8135	27.7689	32.3092	27.3481	32.9448	22.0457	31.7698	33.5415	37.4567	20.5409	31.4967	29.1188	14.0324	13.3338	5.63325	4.6864	4.7208	4.87007	4.71219	4.90031	4.49874	4.86207	4.91522	5.03194	4.428	4.85774	4.77783	4.05956	4.01707
B5M07_05555	CP020694 (Chromosome)	1153153	1153956	-	3-oxoadipate enol-lactonase	6	1	11	18	7	9	2	13	8	44	36	23	51	17	8	22.983	3.47111	35.5401	18.9333	7.95218	7.34855	2.76259	22.9494	9.66626	15.0634	16.4331	8.37167	11.732	8.39536	6.438	4.15108	2.71478	4.61583	3.99775	3.1792	3.10427	2.43504	4.1825	3.35199	3.77714	3.86303	3.21194	3.53141	3.21661
B5M07_05560	CP020694 (Chromosome)	1154067	1155038	-	threonine ammonia-lyase	4	9	1	24	23	37	21	12	26	56	44	38	69	22	20	15.322	31.24	3.23092	25.2444	26.1286	30.2107	29.0072	21.1841	31.4153	19.1715	20.0848	13.8314	15.8727	10.8646	16.095	4.06235	4.72901	3.06185	4.53184	4.56608	4.71672	4.67047	4.35523	4.7537	4.2593	4.3054	3.94211	4.07349	3.71944
B5M07_05565	CP020694 (Chromosome)	1155035	1155856	-	alpha/beta hydrolase	6	6	2	6	16	9	10	7	15	69	22	27	47	25	6	22.983	20.8267	6.46183	6.31109	18.1764	7.34855	13.8129	12.3574	18.1242	23.6221	10.0424	9.82761	10.8119	12.3461	4.8285	4.1859	4.09344	3.11152	3.02522	3.98753	3.14389	3.71835	3.61349	3.98383	4.26488	3.41791	3.39684	3.4862	3.61387
B5M07_05570	CP020694 (Chromosome)	1155856	1156542	-	haloacid dehalogenase, type II	2	0	0	6	6	3	12	1	6	29	6	15	37	10	6	7.66101	0	0	6.31109	6.81616	2.44952	16.5755	1.76534	7.24969	9.92812	2.73884	5.45978	8.51146	4.93845	4.8285	2.62869	1.40477	1.37579	2.5133	2.57985	1.77632	3.42539	1.67335	2.6335	2.9537	1.82849	2.3934	2.80843	2.30472
B5M07_05575	CP020694 (Chromosome)	1156737	1157165	+	peptidylprolyl isomerase	0	3	2	12	9	42	5	4	5	120	82	74	160	62	15	0	10.4133	6.46183	12.6222	10.2242	34.2933	6.90647	7.06137	6.04141	41.0819	37.4309	26.9349	36.8063	30.6184	12.0713	2.43408	3.5924	3.24257	3.73662	3.54501	4.74361	3.22125	3.25324	3.10911	4.94381	4.84215	4.49532	4.82742	4.62812
B5M07_05580	CP020694 (Chromosome)	1157274	1158389	+	RNA methyltransferase	5	6	2	13	10	22	15	9	20	65	23	45	124	37	18	19.1525	20.8267	6.46183	13.674	11.3603	17.9631	20.7194	15.8881	24.1656	22.2527	10.4989	16.3793	28.5249	18.2723	14.4855	4.18412	4.2637	3.32626	3.87147	3.70332	4.13156	4.26946	4.01386	4.42398	4.34721	3.62023	4.04162	4.60288	4.14911
B5M07_05585	CP020694 (Chromosome)	1158576	1159367	-	enoyl-ACP reductase	4	12	8	28	22	30	23	13	21	103	63	162	148	107	69	15.322	41.6533	25.8473	29.4518	24.9926	24.4952	31.7698	22.9494	25.3739	35.2619	28.7578	58.9657	34.0458	52.8414	55.5278	4.35807	5.26018	4.79995	4.91894	4.75896	4.73783	4.99417	4.68172	4.77391	5.09975	4.89424	5.63506	5.06415	5.51839
B5M07_05590	CP020694 (Chromosome)	1159377	1160606	-	beta-ketoacyl-[acyl-carrier-protein] synthase I	7	12	15	34	34	51	33	31	33	121	115	149	226	95	59	26.8135	41.6533	48.4637	35.7629	38.6249	41.6418	45.5827	54.7256	39.8733	41.4242	52.4945	54.2338	51.9889	46.9153	47.4803	4.99898	5.40584	5.55493	5.25273	5.329	5.40375	5.49488	5.6803	5.36072	5.39811	5.64014	5.67406	5.63056	5.52466
B5M07_05595	CP020694 (Chromosome)	1160770	1162149	+	succinate-semialdehyde dehydrogenase	10	14	14	21	70	103	19	26	26	22	54	86	12	9	24	38.3051	48.5956	45.2328	22.0888	79.5218	84.1001	26.2446	45.8989	31.4153	7.53168	24.6496	31.3028	2.76047	4.4446	19.314	5.07306	5.32077	5.24757	4.53373	5.87094	5.93544	4.70351	5.27323	4.88432	3.5369	4.6409	4.88362	2.76629	3.13892
B5M07_05600	CP020694 (Chromosome)	1162223	1162819	+	oxidoreductase	5	15	2	15	35	46	23	16	34	5	28	79	14	13	7	19.1525	52.0667	6.46183	15.7777	39.7609	37.5593	31.7698	28.2455	41.0816	1.71174	12.7813	28.7549	3.22055	6.41998	5.63325	4.16556	5.19457	3.29318	3.98793	4.93375	4.87699	4.69243	4.56555	4.96787	2.19165	3.78272	4.59987	2.58181	3.15983
B5M07_05605	CP020694 (Chromosome)	1162888	1163397	-	3-hydroxyacyl-[acyl-carrier-protein] dehydratase FabA	5	6	10	20	40	33	9	33	27	145	80	137	148	38	15	19.1525	20.8267	32.3092	21.037	45.441	26.9447	12.4317	58.2563	32.6236	49.6406	36.5179	49.866	34.0458	18.7661	12.0713	4.47667	4.54692	4.95637	4.53944	5.31027	4.77919	4.07122	5.5676	4.97002	5.40787	5.08709	5.41252	5.01583	4.42552
B5M07_05610	CP020694 (Chromosome)	1163561	1163980	+	transcriptional repressor	7	11	2	11	4	19	22	20	15	14	15	15	32	11	10	26.8135	38.1822	6.46183	11.5703	4.5441	15.5136	30.3885	35.3068	18.1242	4.79288	6.84711	5.45978	7.36126	5.43229	8.0475	4.33126	4.71174	3.08707	3.53676	2.75245	3.82151	4.50411	4.65758	3.9723	2.73775	3.05026	2.8491	3.1084	2.85227
B5M07_05615	CP020694 (Chromosome)	1164012	1164629	-	SAM-dependent methyltransferase	0	0	0	5	12	22	1	0	4	19	23	33	38	21	27	0	0	0	5.25925	13.6323	17.9631	1.38129	0	4.83313	6.50463	10.4989	12.0115	8.7415	10.3707	21.7283	1.59405	1.55143	1.52009	2.4579	3.34172	3.63531	1.63735	1.24918	2.39038	2.64557	3.10163	3.23833	2.92806	3.0885
B5M07_05620	CP020694 (Chromosome)	1164631	1165410	-	CDP-diacylglycerol--serine O-phosphatidyltransferase	3	2	1	13	27	41	6	5	8	65	27	33	82	23	23	11.4915	6.94222	3.23092	13.674	30.6727	33.4767	8.28777	8.82671	9.66626	22.2527	12.3248	12.0115	18.8632	11.3584	18.5093	3.61254	3.2326	2.79945	3.76067	4.57034	4.66716	3.31478	3.375	3.44371	4.24909	3.66107	3.63607	4.08193	3.58361
B5M07_05625	CP020694 (Chromosome)	1165420	1166112	-	phosphatidylserine decarboxylase	4	2	0	19	7	19	11	3	3	62	21	29	112	31	14	15.322	6.94222	0	19.9851	7.95218	15.5136	15.1942	5.29603	3.62485	21.2256	9.58595	10.5556	25.7644	15.3092	11.2665	3.73639	3.09119	2.07768	4.03193	3.15736	3.78095	3.754	2.85252	2.55869	4.10572	3.3187	3.40956	4.30971	3.77161
B5M07_05630	CP020694 (Chromosome)	1166386	1167255	-	hypothetical protein	6	2	6	12	15	13	12	5	17	98	51	43	85	46	29	22.983	6.94222	19.3855	12.6222	17.0404	10.6146	16.5755	8.82671	20.5408	33.5502	23.2802	15.6514	19.5534	22.7169	23.3378	4.37483	3.40445	4.21691	3.81617	4.09788	3.65595	4.0717	3.52279	4.27939	4.78692	4.40882	4.01443	4.23422	4.38376
B5M07_05635	CP020694 (Chromosome)	1167378	1168682	+	tRNA (N6-isopentenyl adenosine(37)-C2)-methylthiotransferase MiaB	1	2	2	30	16	26	3	16	12	53	30	31	128	26	9	3.83051	6.94222	6.46183	31.5555	18.1764	21.2292	4.14388	28.2455	14.4994	18.1445	13.6942	11.2836	29.445	12.84	7.24275	2.90892	3.23182	3.17721	4.604	4.03703	4.19623	2.79437	4.47707	3.81648	4.0423	3.76286	3.57633	4.54357	3.70054
B5M07_05640	CP020694 (Chromosome)	1168736	1169080	-	hypothetical protein	18	10	16	61	64	123	40	3	13	54	92	108	123	76	52	68.9491	34.7111	51.6947	64.1628	72.7057	100.43	55.2518	5.29603	15.7077	18.4868	41.9956	39.3104	28.2949	37.5322	41.847	5.85848	5.16805	5.56249	5.79565	5.92805	6.27893	5.63733	3.65888	4.42246	4.55055	5.35653	5.28913	4.95887	5.24214
B5M07_05645	CP020694 (Chromosome)	1169538	1170080	+	cell envelope biogenesis protein OmpA	27	18	14	16	16	15	16	8	13	118	82	72	176	52	34	103.424	62.48	45.2328	16.8296	18.1764	12.2476	22.1007	14.1227	15.7077	40.3972	37.4309	26.207	40.4869	25.6799	27.3615	6.17944	5.63391	5.29752	4.33351	4.4056	4.04514	4.59139	4.19116	4.27347	5.19541	5.11586	4.75382	5.19825	4.73386
B5M07_05650	CP020694 (Chromosome)	1170097	1170417	+	hypothetical protein	1	4	0	4	0	2	9	0	8	23	10	16	33	12	1	3.83051	13.8844	0	4.2074	0	1.63301	12.4317	0	9.66626	7.87402	4.56474	5.82377	7.5913	5.92614	0.80475	1.98052	3.05467	1.16817	2.04586	0.736751	1.37928	3.03086	0.921288	2.78811	2.62484	2.11872	2.33947	2.59404	2.35189
B5M07_05655	CP020694 (Chromosome)	1170565	1171554	+	phosphate starvation-inducible protein PhoH	3	17	13	45	47	69	22	13	22	65	72	173	110	72	51	11.4915	59.0089	42.0019	47.3332	53.3932	56.3389	30.3885	22.9494	26.5822	22.2527	32.8661	62.9695	25.3043	35.5568	41.0423	4.20518	5.65894	5.31314	5.44072	5.56554	5.62326	4.9941	4.72869	4.86357	4.68588	5.07006	5.74311	4.80976	5.14937
B5M07_05660	CP020694 (Chromosome)	1171529	1172074	+	rRNA maturation RNase YbeY	8	4	3	17	19	41	12	9	14	61	73	134	109	41	49	30.644	13.8844	9.69275	17.8814	21.5845	33.4767	16.5755	15.8881	16.9159	20.8833	33.3226	48.7741	25.0743	20.2476	39.4328	4.79051	4.07481	3.79491	4.27406	4.45517	4.89662	4.20556	4.17048	4.22297	4.4215	4.89417	5.29476	4.60444	4.39142
B5M07_05665	CP020694 (Chromosome)	1172101	1173003	+	magnesium/cobalt efflux protein	104	76	49	187	198	284	125	110	143	555	641	939	786	475	328	398.373	263.804	158.315	196.696	224.933	231.888	172.662	194.188	172.784	190.004	292.6	341.782	180.811	234.576	263.958	8.40732	7.98171	7.46898	7.68021	7.81721	7.84865	7.55071	7.66758	7.55126	7.645	8.09065	8.252	7.59535	7.8606
B5M07_05670	CP020694 (Chromosome)	1173000	1174499	+	apolipoprotein N-acyltransferase	45	59	34	142	133	177	106	135	148	284	379	579	332	196	139	172.373	204.796	109.851	149.363	151.091	144.522	146.417	238.321	178.826	97.2271	173.004	210.748	76.3731	96.7936	111.86	7.35601	7.53679	6.89816	7.2086	7.22049	7.17457	7.188	7.69988	7.39606	6.77182	7.36184	7.57034	6.53386	6.7677
B5M07_05675	CP020694 (Chromosome)	1174584	1175765	+	methionine adenosyltransferase	1	2	10	24	26	52	31	12	25	430	383	431	359	159	67	3.83051	6.94222	32.3092	25.2444	29.5367	42.4583	42.8201	21.1841	30.207	147.21	174.829	156.878	82.5842	78.5213	53.9183	3.78719	4.02122	5.16637	4.91875	5.06921	5.42693	5.43578	4.76711	5.09132	6.7557	6.94724	6.82646	6.124	6.06875
B5M07_05680	CP020694 (Chromosome)	1175813	1176448	-	cytidylate kinase	7	3	6	11	5	21	5	9	3	32	24	37	41	15	12	26.8135	10.4133	19.3855	11.5703	5.68013	17.1466	6.90647	15.8881	3.62485	10.9552	10.9554	13.4675	9.43162	7.40767	9.657	4.28798	3.40667	3.97182	3.50042	2.88661	3.88429	3.05015	3.79718	2.56974	3.44972	3.4497	3.64999	3.30693	3.08886
B5M07_05685	CP020694 (Chromosome)	1176445	1176948	-	hypothetical protein	2	7	1	6	5	12	8	6	6	46	5	11	20	15	14	7.66101	24.2978	3.23092	6.31109	5.68013	9.79807	11.0504	10.5921	7.24969	15.748	2.28237	4.00384	4.60079	7.40767	11.2665	2.93354	4.00696	2.37928	2.76585	2.67939	3.16171	3.26757	3.22236	2.88597	3.63779	1.95513	2.36626	2.4758	2.90361
B5M07_05690	CP020694 (Chromosome)	1176945	1178297	-	3-phosphoshikimate 1-carboxyvinyltransferase	9	15	5	37	23	49	38	39	23	144	55	77	252	76	44	34.4745	52.0667	16.1546	38.9184	26.1286	40.0088	52.4892	68.8483	27.7905	49.2982	25.1061	28.0269	57.9699	37.5322	35.409	5.14505	5.55286	4.47413	5.26335	4.87153	5.2915	5.56862	5.85135	4.93119	5.5071	4.82808	4.93496	5.67713	5.2269
B5M07_05695	CP020694 (Chromosome)	1178404	1179105	-	tRNA (guanosine(46)-N7)-methyltransferase TrmB	5	0	1	15	12	18	4	12	7	33	4	11	66	9	8	19.1525	0	3.23092	15.7777	13.6323	14.6971	5.52518	21.1841	8.45797	11.2975	1.8259	4.00384	15.1826	4.4446	6.438	3.78082	1.83838	2.41014	3.64742	3.49974	3.58116	2.68684	3.93227	3.04688	3.32896	1.83206	2.38722	3.62689	2.4805
B5M07_05700	CP020694 (Chromosome)	1179236	1179997	+	hypothetical protein	0	0	0	0	0	0	0	0	2	0	0	0	0	2	1	0	0	0	0	0	0	0	0	2.41656	0	0	0	0	0.98769	0.80475	-1.31796	-1.33811	-1.35278	-1.58237	-1.56662	-1.63418	-1.52663	-1.47644	-0.735683	-1.72009	-1.70695	-1.71748	-1.73465	-1.13771
B5M07_05705	CP020694 (Chromosome)	1180443	1182119	+	30S ribosomal protein S1	341	325	243	2308	2516	4306	1351	722	1314	1496	960	1162	2410	700	439	1306.2	1128.11	785.113	2427.67	2858.24	3515.87	1866.13	1274.58	1587.68	512.154	438.215	422.951	554.395	345.691	353.285	10.2451	10.0906	9.71614	10.9164	11.0972	11.3289	10.6284	10.2194	10.4538	9.2885	9.13727	9.10314	9.36634	8.91248
B5M07_05710	CP020694 (Chromosome)	1182404	1182688	+	integration host factor subunit beta	27	13	11	89	76	118	22	37	52	32	26	72	106	39	21	103.424	45.1244	35.5401	93.6146	86.338	96.3477	30.3885	65.3177	62.8307	10.9552	11.8683	26.207	24.3842	19.2599	16.8998	6.295	5.42535	5.19081	6.2023	6.11401	6.235	5.03458	5.81224	5.77378	4.08032	4.15434	4.88444	4.81296	4.59122
B5M07_05715	CP020694 (Chromosome)	1182688	1183038	+	DUF1049 domain-containing protein	8	11	11	49	91	164	27	7	23	29	21	64	56	24	26	30.644	38.1822	35.5401	51.5406	103.378	133.907	37.295	12.3574	27.7905	9.92812	9.58595	23.2951	12.8822	11.8523	20.9235	4.88741	5.10593	5.03489	5.43157	6.1892	6.48277	5.09127	4.05168	4.79407	3.81485	3.7896	4.6173	4.04623	3.97822
B5M07_05720	CP020694 (Chromosome)	1183048	1183695	+	N-(5'-phosphoribosyl)anthranilate isomerase	15	18	18	53	105	110	24	15	7	37	20	53	102	34	17	57.4576	62.48	58.1565	55.748	119.283	89.8157	33.1511	26.4801	8.45797	12.6669	9.12948	19.2912	23.464	16.7907	13.6808	5.56839	5.65935	5.58489	5.55385	6.38365	6.07142	5.01395	4.79222	3.78112	4.0833	3.80105	4.47754	4.66758	4.34731
B5M07_05725	CP020694 (Chromosome)	1183773	1185269	-	phosphomannomutase/phosphoglucomutase	6	6	23	170	149	199	71	25	49	374	442	454	501	185	152	22.983	20.8267	74.3111	178.814	169.268	162.485	98.0719	44.1336	59.2058	128.038	201.761	165.249	115.25	91.3613	122.322	5.29429	5.2128	6.32128	7.23401	7.17471	7.13143	6.59964	5.81635	6.09307	6.87861	7.36626	7.15047	6.76802	6.52681
B5M07_05730	CP020694 (Chromosome)	1185297	1186130	-	3-deoxy-8-phosphooctulonate synthase	12	23	7	78	33	97	36	13	34	175	211	294	288	147	130	45.9661	79.8356	22.6164	82.0442	37.4889	79.2011	49.7266	22.9494	41.0816	59.9111	96.316	107.012	66.2514	72.5952	104.618	5.64081	6.19073	5.00335	6.22445	5.43416	6.18802	5.71187	4.99005	5.52324	5.89939	6.39553	6.50835	6.00311	6.0977
B5M07_05735	CP020694 (Chromosome)	1186127	1187863	-	capsule biosynthesis protein	24	27	30	156	124	169	66	26	36	513	469	507	751	390	343	91.9321	93.72	96.9275	164.088	140.867	137.99	91.1655	45.8989	43.4981	175.625	214.086	184.541	172.76	192.599	276.029	6.66794	6.68619	6.71898	7.25718	7.09762	7.07631	6.65501	6.00561	5.95144	7.3296	7.54064	7.38211	7.3123	7.42744
B5M07_05740	CP020694 (Chromosome)	1187841	1188500	-	ABC transporter	23	9	10	32	18	40	19	5	17	128	94	143	196	91	47	88.1016	31.24	32.3092	33.6592	20.4485	32.6602	26.2446	8.82671	20.5408	43.8207	42.9085	52.0499	45.0877	44.9399	37.8233	6.06865	5.00692	5.03879	5.07784	4.59641	5.0476	4.83444	3.91432	4.60145	5.34786	5.32574	5.52734	5.37782	5.37349
B5M07_05745	CP020694 (Chromosome)	1188745	1189551	-	N-acyl-L-homoserine lactone synthetase	32	99	89	61	58	51	39	12	69	862	551	592	2271	1321	942	122.576	343.64	287.552	64.1628	65.8895	41.6418	53.8705	21.1841	83.3715	295.105	251.517	215.479	522.42	652.369	758.075	7.06733	8.14376	7.95121	6.43542	6.46079	6.04206	6.27773	5.52249	6.68446	7.98256	7.81067	7.64632	8.61038	8.85939
B5M07_05750	CP020694 (Chromosome)	1189762	1191237	+	two-component sensor histidine kinase	416	386	192	1178	719	998	1287	867	1609	2293	2536	3286	2604	1735	1255	1593.49	1339.85	620.336	1239.08	816.803	814.873	1777.73	1530.55	1944.13	785.006	1157.62	1196.06	599.023	856.821	1009.96	10.4892	10.3052	9.51832	10.2231	9.7927	9.79024	10.6069	10.4465	10.7035	9.75231	10.1519	10.1861	9.48244	9.84123
B5M07_05755	CP020694 (Chromosome)	1191402	1192439	-	permease	1	5	10	3	1	6	1	2	2	11	5	9	15	10	4	3.83051	17.3556	32.3092	3.15555	1.13603	4.89904	1.38129	3.53068	2.41656	3.76584	2.28237	3.27587	3.45059	4.93845	3.219	2.01316	3.32436	4.02383	1.84768	1.26203	2.20144	1.38088	1.94285	1.66992	1.97515	1.57907	1.85768	1.89814	2.21274
B5M07_05760	CP020694 (Chromosome)	1192426	1192767	-	transcriptional regulator	0	0	3	0	0	1	3	2	0	11	12	6	18	1	1	0	0	9.69275	0	0	0.816506	4.14388	3.53068	0	3.76584	5.47769	2.18391	4.14071	0.493845	0.80475	0.423329	0.381703	2.07891	-0.0363422	-0.0118357	0.401578	1.42345	1.27089	0.00779778	1.41464	1.74103	0.96981	1.50646	0.152364
B5M07_05765	CP020694 (Chromosome)	1192826	1193476	+	uracil-DNA glycosylase	0	1	3	2	5	4	2	7	7	11	8	6	5	5	2	0	3.47111	9.69275	2.1037	5.68013	3.26602	2.76259	12.3574	8.45797	3.76584	3.65179	2.18391	1.1502	2.46922	1.6095	1.08712	1.79367	2.59906	1.4481	2.19655	1.74685	1.63435	2.90356	2.55827	1.86239	1.83589	1.433	0.987973	1.52971
B5M07_05770	CP020694 (Chromosome)	1193505	1194287	+	hypothetical protein	7	5	2	6	2	15	8	2	12	10	5	27	37	7	4	26.8135	17.3556	6.46183	6.31109	2.27205	12.2476	11.0504	3.53068	14.4994	3.42349	2.28237	9.82761	8.51146	3.45691	3.219	4.06095	3.61634	2.7442	2.71487	1.9773	3.33435	3.22223	2.29371	3.49301	2.18434	1.89406	3.12779	2.99077	2.20329
B5M07_05775	CP020694 (Chromosome)	1194362	1194976	-	GcrA cell cycle regulator	33	13	39	58	28	84	24	17	31	230	175	217	314	137	65	126.407	45.1244	126.006	61.0072	31.8087	68.5865	33.1511	30.0108	37.4567	78.7402	79.8829	78.9849	72.2324	67.6567	52.3088	6.68363	5.63289	6.68228	5.92731	5.28909	6.04756	5.33007	5.24189	5.44451	6.19184	6.20671	6.19505	6.10196	6.03378
B5M07_05780	CP020694 (Chromosome)	1195340	1196515	+	acetylornithine transaminase	4	3	6	8	11	15	14	6	22	146	80	119	165	77	34	15.322	10.4133	19.3855	8.41479	12.4963	12.2476	19.3381	10.5921	26.5822	49.9829	36.5179	43.3143	37.9565	38.0261	27.3615	4.13378	3.82427	4.33569	3.58277	3.92245	3.89794	4.32834	3.79526	4.64066	5.30548	4.97153	5.15233	5.01395	5.01365
B5M07_05785	CP020694 (Chromosome)	1196587	1197492	+	ornithine carbamoyltransferase	4	5	3	7	7	14	9	20	10	239	122	179	299	125	125	15.322	17.3556	9.69275	7.36294	7.95218	11.4311	12.4317	35.3068	12.0828	81.8214	55.6898	65.1534	68.7818	61.7306	100.594	4.25814	4.35748	3.89758	3.59708	3.66127	3.94687	4.03633	5.02576	4.00706	5.93067	5.51168	5.68172	5.74169	5.62226
B5M07_05790	CP020694 (Chromosome)	1197489	1198523	+	2-dehydropantoate 2-reductase	3	6	1	15	8	14	14	6	11	165	102	112	209	79	65	11.4915	20.8267	3.23092	15.7777	9.08821	11.4311	19.3381	10.5921	13.2911	56.4876	46.5603	40.7664	48.0782	39.0137	52.3088	3.90365	4.40134	3.14767	4.13311	3.6465	3.83416	4.32791	3.79325	3.97747	5.43896	5.22984	5.08934	5.26638	5.04177
B5M07_05795	CP020694 (Chromosome)	1198543	1200024	-	anion permease	17	5	10	22	21	16	23	9	5	70	40	85	95	27	15	65.1186	17.3556	32.3092	23.1407	23.8566	13.0641	31.7698	15.8881	6.04141	23.9644	18.259	30.9388	21.8537	13.3338	12.0713	5.53483	4.20949	4.80091	4.4789	4.50896	3.93047	4.79737	4.12046	3.30641	4.51612	4.24528	4.77757	4.42344	3.94429
B5M07_05800	CP020694 (Chromosome)	1200189	1200650	-	NUDIX hydrolase	239	264	164	63	51	121	98	237	179	245	199	320	323	208	133	915.491	916.373	529.87	66.2665	57.9373	98.7972	135.367	418.386	216.282	83.8755	90.8383	116.475	74.3027	102.72	107.032	9.24377	9.24528	8.628	6.47663	6.35473	6.85677	7.17175	8.36774	7.65632	6.69566	6.77348	7.01908	6.57895	6.89425
B5M07_05805	CP020694 (Chromosome)	1200787	1202235	+	phosphogluconate dehydrogenase (NADP(+)-dependent, decarboxylating)	37	26	46	22	35	43	40	35	53	107	86	234	104	50	17	141.729	90.2489	148.622	23.1407	39.7609	35.1098	55.2518	61.787	64.0389	36.6313	39.2567	85.1726	23.9241	24.6922	13.6808	6.72432	6.23636	6.77962	4.87951	5.39824	5.27434	5.73019	5.84459	5.88306	5.31423	5.3837	6.18705	4.89846	4.93213
B5M07_05810	CP020694 (Chromosome)	1202411	1203184	-	tRNA pseudouridine(38-40) synthase TruA	0	6	3	1	4	5	0	3	0	5	2	4	17	8	0	0	20.8267	9.69275	1.05185	4.5441	4.08253	0	5.29603	0	1.71174	0.912948	1.45594	3.91067	3.95076	0	0.715493	3.1781	2.3597	0.781453	1.77131	1.69366	0.324522	1.87301	0.273351	1.00554	0.623376	0.893335	1.68484	1.68064
B5M07_05815	CP020694 (Chromosome)	1203274	1204701	+	hypothetical protein	2	1	1	3	4	13	8	10	12	20	30	64	59	34	24	7.66101	3.47111	3.23092	3.15555	4.5441	10.6146	11.0504	17.6534	14.4994	6.84698	13.6942	23.2951	13.5723	16.7907	19.314	3.12172	2.63617	2.58921	2.41376	2.67085	3.38089	3.4166	3.86202	3.6762	2.97471	3.6291	4.17095	3.62283	3.83211
B5M07_05820	CP020694 (Chromosome)	1204698	1205162	+	hypothetical protein	0	0	0	2	2	3	2	2	2	7	22	41	17	16	8	0	0	0	2.1037	2.27205	2.44952	2.76259	3.53068	2.41656	2.39644	10.0424	14.9234	3.91067	7.90152	6.438	1.08039	1.04499	1.01882	1.44339	1.49534	1.53224	1.62908	1.80016	1.53725	1.49655	2.75532	3.1604	1.89086	2.52043
B5M07_05825	CP020694 (Chromosome)	1205162	1206166	+	TIGR01620 family protein	2	5	5	8	6	9	4	9	19	68	60	114	48	44	26	7.66101	17.3556	16.1546	8.41479	6.81616	7.34855	5.52518	15.8881	22.9574	23.2797	27.3884	41.4943	11.0419	21.7292	20.9235	3.38164	4.03619	3.97133	3.3804	3.20946	3.25797	3.06205	3.95881	4.32344	4.34646	4.51321	4.95477	3.60882	4.27449
B5M07_05830	CP020694 (Chromosome)	1206171	1206950	-	nodulation protein NoeE	0	0	0	1	9	14	2	0	4	2	6	8	0	0	3	0	0	0	1.05185	10.2242	11.4311	2.76259	0	4.83313	0.684698	2.73884	2.91188	0	0	2.41425	0.409861	0.367606	0.33685	0.520663	2.31327	2.45479	1.10604	0.106025	1.57853	0.228685	1.14485	1.20087	-0.531142	-0.311856
B5M07_05835	CP020694 (Chromosome)	1207097	1209148	+	hypothetical protein	12	15	14	83	221	302	36	39	25	8	14	23	8	0	7	45.9661	52.0667	45.2328	87.3035	251.062	246.585	49.7266	68.8483	30.207	2.73879	6.39063	8.37167	1.84032	0	5.63325	5.24755	5.38267	5.23519	5.97116	7.1809	7.16189	5.35085	5.70123	4.82831	2.72322	3.36816	3.59139	2.44182	1.81384
B5M07_05840	CP020694 (Chromosome)	1209145	1210302	+	hypothetical protein	2	5	7	7	28	39	9	16	6	11	15	24	3	5	11	7.66101	17.3556	22.6164	7.36294	31.8087	31.8437	12.4317	28.2455	7.24969	3.76584	6.84711	8.73565	0.690118	2.46922	8.85225	3.09108	3.80106	4.07127	3.02643	4.47613	4.48429	3.50699	4.33491	3.01545	2.4332	2.95092	3.17513	1.34155	2.13801
B5M07_05845	CP020694 (Chromosome)	1210274	1211218	+	glycosyl transferase	0	3	2	3	11	14	12	8	13	9	22	37	9	9	1	0	10.4133	6.46183	3.15555	12.4963	11.4311	16.5755	14.1227	15.7077	3.08114	10.0424	13.4675	2.07035	4.4446	0.80475	1.71503	3.10046	2.71055	2.1461	3.32076	3.24077	3.59819	3.42597	3.54819	2.0737	3.12205	3.41566	1.7606	2.37952
B5M07_05850	CP020694 (Chromosome)	1211215	1212372	+	glycosyl transferase family 1	3	5	8	6	30	18	30	23	42	11	37	53	21	10	16	11.4915	17.3556	25.8473	6.31109	34.0808	14.6971	41.4388	40.6029	50.7478	3.76584	16.8895	19.2912	4.83083	4.93845	12.876	3.71391	4.0673	4.45202	3.17163	4.76146	3.9121	4.96657	4.93953	5.18839	2.71463	4.04804	4.1815	2.89778	2.94005
B5M07_05855	CP020694 (Chromosome)	1212369	1213118	-	hypothetical protein	93	96	87	92	107	62	135	206	213	117	139	218	75	40	35	356.237	333.227	281.09	96.7701	121.555	50.6234	186.475	363.66	257.364	40.0548	63.4499	79.3488	17.253	19.7538	28.1663	8.01537	7.94144	7.75282	6.61852	6.85444	5.97507	7.30853	8.04314	7.66007	5.74903	6.19277	6.41592	5.00443	5.12587
B5M07_05860	CP020694 (Chromosome)	1213490	1216411	+	isoleucine--tRNA ligase	52	74	53	152	118	310	92	73	71	443	294	423	653	277	244	199.186	256.862	171.239	159.881	134.051	253.117	127.079	128.87	85.788	151.661	134.203	153.966	150.216	136.795	196.359	7.54114	7.81026	7.38434	7.31384	7.13323	7.79756	7.07929	7.09376	6.69018	7.25933	7.13394	7.2749	7.24944	7.15349
B5M07_05865	CP020694 (Chromosome)	1216649	1217104	+	cysteine methyltransferase	0	0	0	1	1	0	0	1	1	4	5	3	15	4	4	0	0	0	1.05185	1.13603	0	0	1.76534	1.20828	1.3694	2.28237	1.09196	3.45059	1.97538	3.219	0.105693	0.0688328	0.0420044	0.240655	0.275964	-0.3587	-0.240697	0.484418	0.304516	0.373477	0.699399	0.246175	1.02696	0.598584
B5M07_05870	CP020694 (Chromosome)	1217120	1217815	-	phosphatidylcholine synthase	3	14	20	60	49	73	24	11	18	152	168	104	280	146	62	11.4915	48.5956	64.6183	63.1109	55.6653	59.6049	33.1511	19.4188	21.7491	52.037	76.6876	37.8545	64.411	72.1013	49.8945	4.3477	5.56358	5.85339	5.83575	5.70511	5.77682	5.1856	4.69602	4.7875	5.63706	6.04355	5.31303	5.85978	5.9779
B5M07_05875	CP020694 (Chromosome)	1218084	1218383	+	50S ribosomal protein L28	9	6	2	12	5	25	0	4	5	28	12	13	56	10	10	34.4745	20.8267	6.46183	12.6222	5.68013	20.4126	0	7.06137	6.04141	9.58577	5.47769	4.73181	12.8822	4.93845	8.0475	4.43265	3.9053	2.8691	3.454	2.73319	3.94499	1.44115	2.92231	2.78544	3.19589	2.68305	2.55347	3.48777	2.59569
B5M07_05880	CP020694 (Chromosome)	1218638	1220290	+	BCCT transporter	16	12	10	109	245	437	96	51	174	104	240	364	226	169	158	61.2881	41.6533	32.3092	114.652	278.326	356.813	132.604	90.0325	210.241	35.6043	109.554	132.491	51.9889	83.4598	127.151	6.16363	5.80795	5.58659	6.78508	7.73844	8.01585	6.93694	6.53671	7.43055	5.63085	6.73814	6.9373	5.98797	6.45871
B5M07_05885	CP020694 (Chromosome)	1220312	1221010	-	NAD-dependent protein deacylase	3	1	11	7	5	4	5	9	5	35	19	22	35	15	12	11.4915	3.47111	35.5401	7.36294	5.68013	3.26602	6.90647	15.8881	6.04141	11.9822	8.673	8.00768	8.05138	7.40767	9.657	3.34433	2.51732	4.48697	2.96648	2.7497	2.31566	2.91518	3.67779	2.80155	3.4238	3.11236	3.03773	3.04228	2.96694
B5M07_05890	CP020694 (Chromosome)	1221017	1222012	-	LysR family transcriptional regulator	5	2	2	7	6	5	2	0	3	18	6	9	40	16	4	19.1525	6.94222	6.46183	7.36294	6.81616	4.08253	2.76259	0	3.62485	6.16228	2.73884	3.27587	9.20158	7.90152	3.219	3.5109	2.57362	2.52032	2.66634	2.59519	2.16296	1.90315	1.13472	2.08119	2.51688	1.83998	1.97312	2.89881	2.74503
[truncated: 2,637 more rows]
[truncated: 11 more columns]
