# Supplementary material for: Bacterial lifestyle switch in response to algal metabolites
Source: eLife. 2023 Jan 24;12:e84400. doi: 10.7554/eLife.84400 (PMC9873259; doi:10.7554/eLife.84400)
Supplement: Figure 1—source data 3. [file elife-84400-fig1-data3.xlsx]

## Sheet: Figure 1—source data 3
Figure 1—source data 3. Sulfitobacter D7 expression of genes belonging to KEGG Pathways that are enriched in clusters 2-4 of the heatmap in Figure 1d. a Clusters of differentially expressed genes presented in Figure 1d b Based on NCBI Prokaryotic Genome Annotation Pipeline c Values in bold are statistically significant (|fold change|>2 and adjusted P-value ≤ 0.05)
Clustera	KEGG Pathway enriched	Locus tag	Annotationb	Normalized expression values (log transformed) (triplicate samples for each treatment)															Differential expressionc Fold change (log2)
				ExpCM-1	ExpCM-2	ExpCM-3	ExpCM+DMSP-1	ExpCM+DMSP-2	ExpCM+DMSP-3	StatCM-1	StatCM-2	StatCM-3	MM-1	MM-2	MM-3	MM+DMSP-1	MM+DMSP-2	MM+DMSP-3	Exp-CM +DMSP vs. Exp-CM	Stat-CM vs. Exp-CM	MM +DMSP vs. MM
2	Phenyl-alanine metabolism	B5M07_01040	Phenylacetic acid degradation bifunctional protein PaaZ	8.4	8.5	8.9	6.8	6.8	6.7	7.5	8.8	7.4	6.2	6.4	6.2	6	6.2	6.5	-2.46	-0.64	-0.04
2		B5M07_01045	Phenylacetic acid degradation protein	8.2	7.6	7.2	5.2	4.7	4.8	5.4	7.3	6.2	4.9	5	5.2	4.7	5.3	5.3	-3.88	-1.58	0.14
2		B5M07_01050	Phenylacetate-CoA oxygenase subunit PaaJ	7.8	7.5	7.7	3.7	4.3	4.1	5.1	6.9	5	3.6	4.3	4.1	3.5	4	4.4	-4.93	-2.13	-0.1
2		B5M07_01055	Phenylacetate-CoA oxygenase subunit PaaI	8.6	8.2	8.3	4.8	4.7	4.4	5.4	7.9	5.6	4.4	4.8	5	4.4	4.8	4.7	-5.07	-1.94	-0.18
2		B5M07_01060	1,2-Phenylacetyl-CoA epoxidase subunit B	6.4	5.9	5.4	1	2.6	0.9	2.1	4.4	2.8	1.7	1.8	2.3	1	1.7	1.9	-6.15	-3.13	-0.86
2		B5M07_01065	1,2-Phenylacetyl-CoA epoxidase subunit A	9.1	9.2	8.9	4.8	5.2	5.5	6.8	7.8	6.7	4.8	5.3	5.4	4.7	5.3	5.9	-5.29	-2.37	0.35
2		B5M07_01820	Phenylacetate--CoA ligase	6.8	6.1	5.3	3	4	3.2	4.1	6.1	4	3.6	3.6	3.5	3.3	4	4.3	-3.95	-1.43	0.52
2		B5M07_06600	4-Hydroxyphenylpyruvate dioxygenase	10.2	10.2	10.8	5.2	5.2	5.1	8.7	10.2	8.1	3.9	3.5	3.6	3.8	3.7	4.3	-7	-1.31	0.72
2		B5M07_17080	Hypothetical protein	3.6	3.7	4.5	3.3	1.8	1.2	2.7	3.9	2.7	1.6	2.4	0.8	1.2	1.2	2.2	-2.32	-1.11	-0.38
3	Ribosome	B5M07_02120	30S ribosomal protein S15	3.2	4.3	3	6	5.5	6	3.2	4	4.8	4.8	3.4	4.2	4.9	3.7	2.9	3.23	0.88	-0.19
3		B5M07_05705	30S ribosomal protein S1	10.2	10.1	9.7	10.9	11.1	11.3	10.6	10.2	10.5	9.3	9.1	9.1	9.4	8.9	8.9	1.45	0.56	-0.13
3		B5M07_07690	30S ribosomal protein S6	4.1	6.1	5.1	5.8	6.1	6.4	4.2	3.9	4	5.6	5.6	4.7	5.5	4	3.7	1.03	-2.03	-0.93
3		B5M07_14705	50S ribosomal protein L17	2.7	4	2.6	5.6	5.6	5.8	4.6	5.1	4.5	5.1	4.5	4.7	4.3	3.7	3.1	3.89	2.7	-1.36
3		B5M07_14750	30S ribosomal protein S5	6.1	5.7	6	7.8	7.9	8.4	7.2	7.2	7.5	7.1	7.2	7.2	6.5	6.3	5.7	3.04	2.02	-1.3
3		B5M07_14755	50S ribosomal protein L18	3.6	3.8	2.7	5.5	5.6	6.1	4.5	4.4	5.1	4.6	4.3	4.6	4.4	4	4.1	3.69	2.31	-0.44
3		B5M07_14760	50S ribosomal protein L6	5.4	5.3	5.4	6.5	7	7.5	5.7	6.1	6.4	6.2	6.3	6.2	5.7	5.4	5.3	2.42	1.15	-1.1
3		B5M07_14765	30S ribosomal protein S8	4.2	3.4	4.4	5.2	5	5.5	3.1	3.3	3.7	4.7	4.2	4.6	3.9	3	3.3	1.71	-1.04	-1.52
3		B5M07_14785	50S ribosomal protein L14	3.2	2.7	3.6	4.3	4.6	4.8	2.9	2.9	3.4	3.9	4	3.4	3.6	1.9	3.3	2.05	-0.22	-0.95
3		B5M07_14790	30S ribosomal protein S17	1.8	4.1	3.1	4.1	4.3	4.3	1.3	1.4	1.2	2.8	2.7	2.8	3.6	2.6	2.5	1.17	-5.59	0.45
3		B5M07_14865	50S ribosomal protein L4	5.8	5.4	5	6.8	7.2	7.5	6	5.7	5.8	6.4	6.2	6	6.2	5.6	5.5	2.51	0.66	-0.56
3		B5M07_14890	30S ribosomal protein S7	3.4	5.5	4.5	7	7.1	7.8	5.5	3.9	4.7	5.8	5.4	5.3	5.4	5.4	4.9	3.5	0.15	-0.37
3		B5M07_14895	30S ribosomal protein S12	4.5	3.9	3.2	5.8	5.5	6.5	5	3.3	4.2	5.3	4.5	3.7	5.2	4.3	3.9	2.96	0.68	-0.04
3		B5M07_14940	50S ribosomal protein L11	6.4	6.7	6.5	7.9	7.7	7.7	6.4	6	5.9	7.1	6.9	6.6	7	6.6	5.9	1.7	-0.65	-0.38
3		B5M07_15210	50S ribosomal protein L19	5.7	5.8	4.8	6.7	6.7	6.7	6.1	5.9	5.8	5.7	5.2	4.8	5.8	5.5	5.1	1.61	0.56	0.33
4	Oxidative phospho-rylation	B5M07_13780	ATP synthase F1 subunit epsilon	5.2	4.4	3.6	5.9	5.7	6	5.6	5.9	5.9	5.7	5.5	5.7	5.6	5.3	4.7	2.04	1.94	-0.55
4		B5M07_13785	F0F1 ATP synthase subunit beta	7.6	6.9	7.4	8.5	8.7	8.9	8.2	8.5	8.6	8.8	8.6	8.4	8.3	8.5	8.2	1.99	1.64	-0.37
4		B5M07_13790	F0F1 ATP synthase subunit gamma	6.2	5.7	5.3	6.7	6.9	6.9	6.6	6.9	6.7	6.9	6.9	6.6	6.8	6.5	6.4	1.52	1.42	-0.26
4		B5M07_13795	F0F1 ATP synthase subunit alpha	7.6	6.7	7.4	8.4	8.3	8.8	7.6	7.6	7.9	8.8	8.6	8.4	8.7	8.5	8.6	1.75	0.64	-0.02
4		B5M07_15125	ATP F0F1 synthase subunit B	4.2	3.6	3.2	5.3	4.4	5	4.1	4.6	4.8	5.8	4.5	4.4	5.3	5	4.4	2.04	1.45	-0.19
4		B5M07_15135	F0F1 ATP synthase subunit C	2.7	2.1	2	3.3	3.9	3.9	2.4	4.3	2.7	4.7	3.7	4.1	4.4	3.7	2.6	3.6	3.13	-0.64
