# Supplementary material for: Bacterial lifestyle switch in response to algal metabolites
Source: eLife. 2023 Jan 24;12:e84400. doi: 10.7554/eLife.84400 (PMC9873259; doi:10.7554/eLife.84400)
Supplement: Figure 1—source data 4. [file elife-84400-fig1-data4.xlsx]

## Sheet: Figure 1—source data 4
Figure 1—source data 4. Number of sequencing reads of Sulfitobacter D7 transcriptome experiment.
Treatment	Replicate	Raw reads	Reads after adapter trimming and quality control	Reads aligned concordantly to Sulfitobacter D7 genome
Exp-CM	1	767618	745975	176676
	2	922968	906039	191517
	3	1151749	1129112	226304
Exp-CM+DMSP	1	1534356	1480621	685162
	2	1589860	1571506	759918
	3	2407636	2369101	1185338
Stat-CM	1	1322423	1297304	464970
	2	839261	821289	314033
	3	1313839	1297430	512039
MM	1	6120691	5850724	1222165
	2	12093273	11808396	1151032
	3	10670288	10410612	1417129
MM+DMSP	1	9290554	9017929	1934490
	2	7948137	7804118	1114609
	3	6528722	6396058	895160
