# Supplementary material for: Bacterial lifestyle switch in response to algal metabolites
Source: eLife. 2023 Jan 24;12:e84400. doi: 10.7554/eLife.84400 (PMC9873259; doi:10.7554/eLife.84400)
Supplement: Figure 2—source data 1. [file elife-84400-fig2-data1.xlsx]

## Sheet: Figure 2—source data 1
Figure 2—source data 1. Sulfitobacter D7 expression of flagellar genes a Values in bold are statistically significant (|fold change|>2 and adjusted P-value ≤ 0.05). NA – could not calculate due to low detection limit
Locus tag	Gene	Structural component	Normalized expression values (log transformed) (triplicate samples for each treatment)															Differential expressiona Fold change (log2)
			ExpCM-1	ExpCM-2	ExpCM-3	ExpCM+DMSP-1	ExpCM+DMSP-2	ExpCM+DMSP-3	StatCM-1	StatCM-2	StatCM-3	MM-1	MM-2	MM-3	MM+DMSP-1	MM+DMSP-2	MM+DMSP-3	Exp-CM +DMSP vs. Exp-CM	Stat-CM vs. Exp-CM	MM +DMSP vs. MM
B5M07_04650	FliG	C ring, switch complex	3.7	5.3	5.4	6.1	5.5	6	6.3	5.1	6.1	6.9	7.1	7.1	6.7	6.7	6.6	1.37	1.46	-0.51
B5M07_04680	FliM	C ring, switch complex	7.2	7.3	7.6	7.4	7.4	6.9	8.2	7.2	7.9	8.5	8.7	8.8	8.1	8.4	8.6	-0.2	0.7	-0.45
B5M07_04660	FliN	C ring, switch complex	4.5	4	3.2	5.7	5.3	5.4	5.5	4	5.2	6.4	6.8	6.3	5.8	6.1	6	2.74	2.11	-0.72
B5M07_04740	FlgB	Rod	5.5	6.2	5.8	5.5	5.3	5	6.2	5.5	6.3	7.2	6.8	6.5	7	6.6	6.8	-0.91	0.28	-0.1
B5M07_04735	FlgC	Rod	3.4	3.9	5.2	4.4	4.5	4.6	5	3.6	5.1	4.9	5.3	5.1	5	4.8	5	0.17	0.52	-0.2
B5M07_04590	FlgF	Rod	5.1	5.3	5.1	6.4	6.6	5.6	7.5	5.7	7.2	7.3	7.2	7	6.7	7	7.3	1.76	2.84	-0.24
B5M07_04585	FlgG	Rod	5.3	4.6	4.7	6.4	5.9	5.7	6.6	5.1	6.7	7.3	7.4	7.3	6.4	6.8	7.1	1.93	2.38	-0.7
B5M07_04730	FliE	Rod-associated	3.4	1.9	1.9	2.5	1.8	2.3	3.8	2.5	3.5	3.9	4.4	4.7	3.8	3.6	3.7	-0.28	1.64	-0.92
B5M07_04675	FliL	Rod-associated	7.5	6.8	6.7	6.4	6.3	6.2	7.7	7.6	8.1	8.2	7.8	8.2	8.2	8	8.3	-1.12	1.09	0.08
B5M07_04575	FlgH	L ring	2.8	2.8	2.7	4.8	4.8	4.6	5	3.5	4.1	5.9	6.1	5.8	5	5.3	5.2	5.43	4.89	-1.1
B5M07_04615	FlgI	P ring	4.1	5.6	5.2	7	7	7	7	5.9	7.1	7.3	7.7	7.7	7.1	7	7	3.02	2.73	-0.75
B5M07_04580	FlgA	P ring chaperon	4.2	3.2	4.6	5.5	5.3	4.6	5.5	4.4	5.3	6.1	6.4	6.3	5.3	5.7	5.5	1.81	1.77	-1.02
B5M07_04670	FliF	MS ring	5.7	5.5	6.6	6.9	6.9	6.5	7	6.4	7.2	8.5	8.5	8.3	8.1	8.4	8.3	1.22	1.41	-0.18
B5M07_04535	MotA	Ion channels (PMF)	5	6	4.7	6.2	6	5.9	6.4	5.4	6.9	7.5	7.8	7.7	7.2	7.4	7.4	1.13	1.68	-0.44
B5M07_04550	MotB	Ion channels (PMF)	6.3	5	5.3	6.3	6.1	6.2	6.9	6.4	6.5	7.2	7.4	7.2	6.4	6.6	6.6	0.79	1.38	-0.96
B5M07_13825	MotB	Ion channels (PMF)	5.5	4.8	5.8	6.6	5.9	6.5	6.3	5.4	6.4	7	7	7	6.9	6.9	6.6	1.43	1.07	-0.24
B5M07_04705	FlhA	T3SS	0	0	-0.8	-0.5	0.6	-1.2	-0.4	-1	-1.1	-1	-1.3	-1.4	-0.7	-1.3	-1.2	-0.4	NA	NA
B5M07_04695	FlhB	T3SS	3.6	2.2	2.1	1.8	2.5	1.3	2.2	2.4	2.3	2.3	3	2.7	2.6	2.9	2.7	-1.62	-0.81	0.07
B5M07_04725	FliQ	T3SS	1.9	1.8	1	1.4	0.6	1.5	0.7	1.8	1.2	2.8	3.3	2.5	2.7	2.2	1.5	-0.56	NA	NA
B5M07_04655	FliP	T3SS	4.2	5.1	4.9	6.8	6.5	6.3	6.1	4.8	6.3	7.4	7.9	7.5	7	7.1	7.1	2.84	1.94	-0.73
B5M07_04700	FliR	T3SS	0	0	0	0	0	0	0	0	0	0	0	0	0	0	0	NA	NA	NA
B5M07_04665	FliH	ATPase complex	4.1	3.3	4	5.6	5	5.2	5.3	4.7	5.1	6.8	6.9	6.9	6.4	6.2	6.2	2.99	2.7	-0.82
B5M07_04745	FliI	ATPase complex	6.6	6	6.3	6	5.4	5.8	6.6	6.5	6.5	7	6.6	6.9	6.4	6.4	6.3	-0.8	0.31	-0.67
B5M07_04630	FliC	Filament	11.6	11.6	11.3	10.7	10.6	10.5	11.5	11.4	11.5	10.2	10.3	10.2	10.2	10.3	10.5	-1.28	-0.08	0.18
B5M07_04560	FliK	Hook control	6	6.2	6.5	7.4	7.5	7.3	8.2	6.6	7.7	8.1	8.4	8.4	7.6	7.6	7.6	1.78	2.19	-0.92
B5M07_04565	FlgD	Hook control	3.6	3.5	4.7	5.4	4.8	5.1	5.5	4.6	5.2	5.9	6.4	6.1	5.1	5.4	5.6	1.71	1.76	-1.04
B5M07_04600	FlgE	Hook	7.1	7	7	8.3	8.3	8	8.8	7.6	8.7	8.9	9.1	8.8	8.9	9.4	9.4	1.71	2.17	0.39
B5M07_04610	FlgL	Hook-filament junction	5.1	3.8	4.6	6.5	6.5	6.7	6.8	6	6.4	7.2	7.6	7.2	6.8	6.6	6.9	3.44	3.28	-0.73
B5M07_04605	FlgK	Hook-filament junction	5.8	6.1	6.3	8.3	8.1	8.1	8.5	7.5	8.5	9.1	9.2	9.2	8.6	8.9	9.1	3.39	3.5	-0.4
