# Supplementary material for: Bacterial lifestyle switch in response to algal metabolites
Source: eLife. 2023 Jan 24;12:e84400. doi: 10.7554/eLife.84400 (PMC9873259; doi:10.7554/eLife.84400)
Supplement: Figure 2—source data 2. [file elife-84400-fig2-data2.xlsx]

## Sheet: Figure 2—source data 2
Colony area (mm2)
Liquid media		Exp-CM	MB	Exp-CM+DMSP	MB	Stat-CM	MB
Semi-solid media		Exp-CM	Exp-CM	Exp-CM+DMSP	Exp-CM+DMSP	Stat-CM	Stat-CM
Replicate	1	27.7954	11.9476	23.3973	10.2577	38.0552	26.8201
	2	13.688	9.647	16.5106	9.589	35.0434	12.0738
	3	8.87245	12.3305	16.8681	9.80869	31.2223	13.3314
	4	12.8146	10.0003	16.1296	9.81212	36.8625	10.7952
	5	18.5883	11.3552	22.5523	9.64616	36.1159	13.8386
	6	9.31605	9.5204	26.4433	19.8303	39.917	18.4432
	7	9.31442	10.2114	25.0521	11.9067	38.6948	12.6226
	8	9.46897	9.79025	17.7734	12.0813	34.3963	15.9498
	9	9.86218	9.77057	17.6465	9.63677	39.3708	12.6376
	10	9.49638	10.0995	21.0366	10.5476	39.1209	12.8537
	11		9.92759	22.7242	9.73364	36.7188	13.8551
	12		12.895	23.9203		38.0387	11.9821
Average		12.9217	10.6246	20.8379	11.1682	36.963	14.6003
Standard Deviation		5.73899	1.1281	3.51187	2.86873	2.39	4.1552
