# Supplementary material for: Bacterial lifestyle switch in response to algal metabolites
Source: eLife. 2023 Jan 24;12:e84400. doi: 10.7554/eLife.84400 (PMC9873259; doi:10.7554/eLife.84400)
Supplement: Figure 4—source data 1. [file elife-84400-fig4-data1.xlsx]

## Sheet: Figure 4—source data 1
Figure 4—source data 1. Sulfitobacter D7 expression of benzoate transport and metabolism genes a Values in bold are statistically significant (|fold change|>2 and adjusted P-value ≤ 0.05). NA – could not calculate due to low detection limit
Locus tag	Gene	Function	Normalized expression values (log transformed) (triplicate samples for each treatment)															Differential expressiona Fold change (log2)
			ExpCM-1	ExpCM-2	ExpCM-3	ExpCM+DMSP-1	ExpCM+DMSP-2	ExpCM+DMSP-3	StatCM-1	StatCM-2	StatCM-3	MM-1	MM-2	MM-3	MM+DMSP-1	MM+DMSP-2	MM+DMSP-3	Exp-CM +DMSP vs. Exp-CM	Stat-CM vs. Exp-CM	MM +DMSP vs. MM
B5M07_03645	BenE	Transporter	4.1	3.2	3.4	3	3.9	3.8	3.4	4.2	3.5	2.2	2.5	2	1.2	2.4	1.5	-0.05	0.1	-1
B5M07_19060	BenM	Transcription	5.3	5.5	6.4	7.5	7.2	7.4	6.6	4.9	6.3	4.7	4.9	4.6	4.7	4.9	4.7	2.07	0.43	0.05
B5M07_19105	BenA	Benzoate catabolism enzymes	9.3	10.2	10.9	12.1	12.1	12.4	12.2	9.6	11.7	6.9	6.8	6.7	7	7.8	8.3	2.36	1.56	2.19
B5M07_19100	BenB	Benzoate catabolism enzymes	5.5	7.5	8	9.8	9.8	10	9.7	7.3	9.3	4.5	4.1	4	4.7	5.5	6	3.19	2.24	2.7
B5M07_19095	BenC	Benzoate catabolism enzymes	4.9	6.5	8.1	10.2	10.2	10.5	10.3	6.5	9.1	4.6	4.6	4.3	4.5	5.3	6	4.01	2.88	1.84
B5M07_19090	BenD	Benzoate catabolism enzymes	4.5	4.6	6.8	9.1	9.3	9.7	9.2	4.5	7.4	3.3	3.5	3.6	3.8	4.7	4.2	4.53	3	1.73
B5M07_19055	CatA	Benzoate catabolism enzymes	9.7	11.5	11	11.5	11.7	11.7	11	8.4	10.6	6.5	6.3	6.3	6.5	6.7	6.7	0.84	-0.7	0.58
B5M07_19110	CatB	Benzoate catabolism enzymes	9.2	11.1	10.5	9.6	9.8	9.4	9.7	8.3	9.8	6	5.8	5.8	6	6.2	6.6	-1.16	-1.37	0.8
B5M07_19210	PcaD	Benzoate catabolism enzymes	1.7	2.2	1.6	2.3	1	0.4	2.4	0.7	1.7	1.6	2	1.2	1.1	1.6	2.2	-0.76	NA	NA
B5M07_19140	PcaI	Benzoate catabolism enzymes	2.4	4.5	4.7	2.7	3	3	3.1	2.3	3.4	1.9	2	2.7	2.3	1.9	2	-1.86	-1.7	-0.31
B5M07_19145	PcaJ	Benzoate catabolism enzymes	3.3	2.6	3.2	1	2.1	2.7	3.1	2.7	2.9	2.5	2	2	2.1	1.9	2.2	-1.63	-0.32	-0.23
B5M07_19150	PcaF	Benzoate catabolism enzymes	4.8	5.3	6.5	4.7	4.3	4.9	5.4	4.9	5.5	4.2	4.2	4.1	3.9	3.6	3.7	-1.54	-0.63	-0.63
