# Supplementary material for: Bacterial lifestyle switch in response to algal metabolites
Source: eLife. 2023 Jan 24;12:e84400. doi: 10.7554/eLife.84400 (PMC9873259; doi:10.7554/eLife.84400)
Supplement: Figure 4—source data 2. [file elife-84400-fig4-data2.xlsx]

## Sheet: Figure 4—source data 2
Benzoate (µM)
Treatment	Replicate	Time (h)
		0	8	18	24
No bac	A	90.9522	94.6094	88.1751	87.0365
	B	97.1536	94.0231	87.3352	98.0353
	C	102.847	91.4046	90.5992	90.6843
+D7	A	90.9522	88.7533	9.06605	0
	B	97.1536	74.2719	9.03866	0
	C	102.847	91.1876	4.77458	0
No bac-Avergae		96.9842	93.3457	88.7032	91.9187
+D7-Avergae		96.9842	84.7376	7.62643	0
No bac- Standard Deviation		4.8574	1.39328	1.38383	4.57429
+D7- Standard Deviation		4.8574	7.46679	2.01659	0
Bacterial abundance/mL
	Replicate	Time (h)
		0	8	18	24
+D7	A	10000	260249	1.03054e+07	1.95981e+07
	B	10000	262383	9.64916e+06	1.72577e+07
	C	10000	201028	1.15789e+07	2.21989e+07
+D7-Avergae		10000	241220	1.05111e+07	1.96849e+07
+D7- Standard Deviation		0	33488.6	940836	3.94623e+06
