# Supplementary material for: Bacterial lifestyle switch in response to algal metabolites
Source: eLife. 2023 Jan 24;12:e84400. doi: 10.7554/eLife.84400 (PMC9873259; doi:10.7554/eLife.84400)
Supplement: Figure 4—source data 3. [file elife-84400-fig4-data3.xlsx]

## Sheet: Figure 4—source data 3
Benzoate (nM)
Treatment	Replicate	Time (d)
		0	3	6	9
E. huxleyi	A	4.23611	14.0278	17.3611	16.8056
	B	4.375	10.1389	16.3889	21.1806
	C	4.65278	16.3194	11.5972	22.9167
E. huxleyi + D7	A	4.23611	0.5	0.5	0.5
	B	4.375	0	0.5	0.5
	C	4.65278	0	0	0.5
E. huxleyi-Avergae		4.4213	13.4954	15.1157	20.3009
E. huxleyi + D7-Avergae		4.4213	0.166667	0.333333	0.5
E. huxleyi-Standard Deviation		0.173225	2.55113	2.51943	2.57122
E. huxleyi + D7-Standard Deviation		0.173225	0.235702	0.235702	0
