# Supplementary material for: Bacterial lifestyle switch in response to algal metabolites
Source: eLife. 2023 Jan 24;12:e84400. doi: 10.7554/eLife.84400 (PMC9873259; doi:10.7554/eLife.84400)
Supplement: Figure 5—source data 1. [file elife-84400-fig5-data1.xlsx]

## Sheet: Figure 5—source data 1
Figure 5—source data 1. Presence of benzoate degradation and transport genes in genomes of phytoplankton-associated Proteobacteria. a Taxonomy ID or RefSeq assembly accession b Bacterial benzoate degradation pathways are elaborated in Figure S3 Colored tiles depict the presence of a gene Bacterial strains highlighted in bold harbor genes for both transport and catabolism and thus can utilize benz…
Bacterial Strain	Benzoate-related genes													Genome accession numbera	References
						Degradation pathwayb
	Transport					Catechol			Proto-catechuate		Benzoyl-CoA
	BenK1	BenK2	BenE1	BenE2	BenF	BenA	BenB	BenC	BphA	PobA	CoA-ligase	BoxA	BoxB
Sulfitobacter D7			+	+		+	+	+	Partial	Partial	+			1968541	(Barak-Gavish et al., 2018)
Sulfitobacter sp. CB2047			+	+		+	+	+	Partial	+	+	Partial		1525218	(Ankrah et al., 2014)
Sulfitobacter pontiacus DSM 10014								+	Partial	+	+			60137	(Vincent et al., 2021)
Sulfitobacter brevis DSM 11443						+		+	+	+	+	+	+	74348	(Vincent et al., 2021)
Sulfitobacter pseudonitzschiae F5	Partial	Partial				+		+	Partial	+	+	+	+	GCF_014805345.1	(Amin et al., 2015; Fei et al., 2020)
Sulfitobacter geojensis EhN01		Partial				+		+	Partial	+	+	+	+	GCF_001650795.1	(Orata et al., 2016)
Sulfitobacter pontiacus EhN02		+				Partial		+	Partial	+	+			GCF_001650835.1	(Orata et al., 2016)
Sulfitobacter sp. EhC04						+	+	+	+	+	+	+	+	1849168	(Rosana et al., 2016)
Rhodobacteraceae bacterium EhC02			+	+		+		+	+	+	+	Partial		1849170	(Rosana et al., 2016)
Roseovarius indicus EhC03		+	+	+		+		+	+	+	+	+	+	GCF_001650975.1	(Rosana et al., 2016)
Ruegeria pomeroyi DSS-3			+	+		Partial	Partial	Partial	Partial	+	+	+	+	246200	(Durham et al., 2015; Landa et al., 2017)
Ruegeria sp. R11			+	+		Partial		Partial	Partial	+	+	Partial		439497	(Mayers et al., 2016)
Ruegeria sp. TM1040			+	+		+		+	Partial	+	+	Partial		292414	(Miller et al., 2004; Miller and Belas, 2006)
Phaeobacter inhibens DSM 17395		+	+	+		+		+	Partial	+	+	Partial		391619	(Seyedsayamdost et al., 2011; Segev et al., 2016)
Dinoroseobacter shibae DFL-12						Partial		Partial	Partial	+	+	Partial		398580	(Wang et al., 2014, 2015)
Jannaschia sp. EhC01						+		+	+	+	+	Partial	+	1849359	(Rosana et al., 2016)
Erythrobacter sp. EhN03	Partial	Partial				Partial					+			1849358	(Orata et al., 2016)
Sphingomonadales bacterium EhC05	+	+				+		+	+	+	+			1849171	(Rosana et al., 2016)
Marinobacter adhaerens		+	+	+		+	+	+			+	+		1033846	(Amin et al., 2009; Sonnenschein et al., 2012)
Marinobacter algicola	+	+	+	+		+	+	+			+	+		236100	(Amin et al., 2009; Green et al., 2015)
Marinobacter sp. EhC06		+				+	+	+			+	+		1849169	(Rosana et al., 2016)
Marinobacter sp. EhN04				+		+		+			+	+		1849167	(Orata et al., 2016)
Pseudoalteromonas piscicida A757	+	Partial	+	+		Partial		+			+	+		GCF_004103285.1	(Harvey et al., 2016)
