# Supplementary material for: Bacterial lifestyle switch in response to algal metabolites
Source: eLife. 2023 Jan 24;12:e84400. doi: 10.7554/eLife.84400 (PMC9873259; doi:10.7554/eLife.84400)
Supplement: Figure 5—source data 2. [file elife-84400-fig5-data2.xlsx]

## Sheet: Figure 5—source data 2
Bacterial abundance/mL
	Replicate
Bacterial strain		Sulfitobacter D7			S. pontiacus			S. brevis
Carbon source		No C	Benzoate	Succinate	No C	Benzoate	Succinate	No C	Benzoate	Succinate
	A	2420400	14873400	5.6928e+06	2.3598e+06	1647000	15105400	1.2026e+06	1.3364e+06	5.3968e+06
	B	2322000	19083200	4802400	1882400	2459000	1.25786e+07	1395600	766000	4559400
	C	1907600	2.07386e+07	3878200	1564800	1553400	13860000	1423400	637800	4755200
Avergae		2.21667e+06	1.82317e+07	4.79113e+06	1.93567e+06	1.88647e+06	13848000	1.34053e+06	913400	4903800
Standard Deviation		222205	2.46899e+06	740850	326736	406642	1.0316e+06	98191.7	303651	357651
