# Supplementary material for: Bacterial lifestyle switch in response to algal metabolites
Source: eLife. 2023 Jan 24;12:e84400. doi: 10.7554/eLife.84400 (PMC9873259; doi:10.7554/eLife.84400)
Supplement: Figure 5—source data 3. [file elife-84400-fig5-data3.xlsx]

## Sheet: Figure 5—source data 3
E. huxleyi and bacterial abundances
	Average of E. huxleyi/mL						Standard Deviation of E. huxleyi/mL
Time (d)	Control	+D7	+S. pontiacus	+S. brevis		Time (d)	Control	+D7	+S. pontiacus	+S. brevis
0	1147190	1.1865e+06	1.1234e+06	1.12943e+06		0	31778.5	5061.35	11607.4	30166.5
2	1.25487e+06	1327870	1275360	1.27221e+06		2	32337.7	28953.2	18979.1	21982.2
4	1769260	1.83881e+06	1.93888e+06	1.97921e+06		4	67848.2	72083.9	43376.7	36936.8
6	2.91235e+06	2.66529e+06	3249280	3.30299e+06		6	82897.2	67744	19091.8	101166
7	3465300	3162780	3611680	3633640		7	4140	135683	105103	127521
9	4561590	4033620	5190890	5.11728e+06		9	82247.4	21709.8	35715.3	44259
11	4924620	2.15525e+06	5337470	5.40151e+06		11	111716	104307	68623.7	20284.5
13	5.0206e+06	24700	5276130	5344180		13	106862	14106.1	132178	28404.7
16	4.4301e+06	1633.33	4.83465e+06	5.02818e+06		16	165984	351.979	113687	124325
	Average of Bacteria/mL						Standard Deviation of Bacteria/mL
Time (d)	+D7	+S. pontiacus	+S. brevis			Time (d)	+D7	+S. pontiacus	+S. brevis
0	1000	1000	1000			0	0	0	0
2	2.72747e+06	1.64027e+06	1243400			2	186216	67548.4	29915
4	1.18013e+07	4.70227e+06	3337200			4	258712	124227	67398.7
6	20533000	9.80473e+06	5.39247e+06			6	910083	170486	365651
7	2.48717e+07	1.24143e+07	5700800			7	1.71974e+06	694324	357755
9	38241200	2.07861e+07	9.90513e+06			9	1.44305e+06	661241	281225
11	69770200	3.22111e+07	1.68711e+07			11	1.64681e+06	693239	903597
13	8.56783e+07	4.36543e+07	2.44571e+07			13	6.13173e+06	1.47207e+06	917007
16	9.62755e+07	74730800	47236000			16	3.03896e+06	1.91016e+06	1.24734e+06
