# Supplementary material for: Bacterial lifestyle switch in response to algal metabolites
Source: eLife. 2023 Jan 24;12:e84400. doi: 10.7554/eLife.84400 (PMC9873259; doi:10.7554/eLife.84400)
Supplement: Figure 6—source data 1. [file elife-84400-fig6-data1.xlsx]

## Sheet: Figure 6—source data 1
E. huxleyi mono-cultures
	Average of E. huxleyi/mL						Standard Deviation of E. huxleyi/mL
Time (d)	No	DMSP	Benzoate	DMSP+Benzoate		Time (d)	No	DMSP	Benzoate	DMSP+Benzoate
0	824000	843020	785743	795897		0	25073.8	22537.5	14285.9	8471.16
2	986603	1.20315e+06	832993	1.13272e+06		2	37064	17987.7	49660.9	40690.1
4	1480850	1.74576e+06	1.35545e+06	1.71766e+06		4	24511.1	12371.8	57039.3	17826.9
6	2.65088e+06	2.5689e+06	2.30061e+06	2512540		6	29209.1	82628.9	42335.4	43458.6
7	3.43116e+06	3.40979e+06	2.94409e+06	3.12571e+06		7	88086.5	95061.6	67997.2	43831.9
8	3.79907e+06	3.50504e+06	3.27083e+06	3.35401e+06		8	52376.6	28794.9	21282.9	50073
10	5.11643e+06	4848230	4.43433e+06	4.53396e+06		10	39767.1	23749.6	17643	117107
11	5.13275e+06	5085860	4517790	5.00858e+06		11	20437.9	71031.8	95954.6	119655
12	5463260	5532460	4600640	5.30214e+06		12	34920.8	47532	162239	38462.5
13	5.13541e+06	5.34522e+06	4.725e+06	5.22513e+06		13	27329.3	92691.3	112805	104426
14	5.47154e+06	5.8901e+06	4.23695e+06	5334600		14	96594.3	57043.2	160289	14018.3
17	5.23758e+06	5557460	4.88809e+06	5050020		17	68563.2	188640	246127	78215.1
