# Supplementary material for: Bacterial lifestyle switch in response to algal metabolites
Source: eLife. 2023 Jan 24;12:e84400. doi: 10.7554/eLife.84400 (PMC9873259; doi:10.7554/eLife.84400)
Supplement: Figure 6—source data 2. [file elife-84400-fig6-data2.xlsx]

## Sheet: Figure 6—source data 2
E. huxleyi + Sulfitobacter D7 Co-cultures
	Average of E. huxleyi/mL						Standard Deviation of E. huxleyi/mL
Time (d)	No	DMSP	Benzoate	DMSP+Benzoate		Time (d)	No	DMSP	Benzoate	DMSP+Benzoate
0	868113	881457	791203	811387		0	40331	29403.1	3547.79	21679.8
2	1105260	1.16907e+06	938330	1.09196e+06		2	32414.7	27450.9	28733.3	101367
4	1516610	1.65875e+06	1.67182e+06	2.14514e+06		4	11232.8	47924.2	30097	118145
6	2.63137e+06	653563	2646950	3.01393e+06		6	120332	50211.9	162408	102958
7	3.29073e+06	102977	3.07226e+06	3303500		7	56122.5	6158.06	44019.8	79591.5
8	3.87254e+06	24060	3.44347e+06	2.7841e+06		8	84454.4	8943.5	41922.2	107366
10	4891600	2740	4511620	365157		10	72659.1	1064.46	69937.2	8398.94
11	4679970	2653.33	4.28598e+06	67656.7		11	133971	498.42	101051	10914.8
12	4.00217e+06	2576.67	3.30692e+06	8563.33		12	312201	426.953	173525	2052.87
13	2282230	2163.33	1.69e+06	2503.33		13	536297	306.848	161456	488.148
14	1.28261e+06	2636.67	558300	1910		14	492198	622.593	130012	368.872
17	1806.67	2873.33	3156.67	2013.33		17	691.392	220.05	254.864	876.445
	Average of Bacteria/mL						Standard Deviation of Bacteria/mL
Time (d)	No	DMSP	Benzoate	DMSP+Benzoate		Time (d)	No	DMSP	Benzoate	DMSP+Benzoate
0	1000	1000	1000	1000		0	0	0	0	0
2	3562800	3.85367e+06	1.38169e+07	13007800		2	30645.1	144634	1.43778e+06	701537
4	7.56087e+06	11366200	43145400	4.31993e+07		4	567960	452291	2.91029e+06	228197
6	1.27281e+07	3.54569e+07	4.67045e+07	46124000		6	727761	1.1056e+06	170085	3.01844e+06
7	1.38655e+07	4.61765e+07	4.15421e+07	4.91267e+07		7	938930	842893	3.32001e+06	1.64226e+06
8	1.76451e+07	5.02281e+07	4.73475e+07	5.86965e+07		8	430415	942453	525722	379424
10	2.05209e+07	45721600	3.99783e+07	73106600		10	861850	766997	5.18723e+06	2.13587e+06
11	3.41337e+07	5.22251e+07	5.64937e+07	8.40875e+07		11	2.03071e+06	1.36218e+06	8.3378e+06	782598
12	43285400	48263800	68849600	8.41459e+07		12	4.92132e+06	1.04018e+06	3.51894e+06	1.23904e+06
13	6.91985e+07	52035400	9.83659e+07	9.01399e+07		13	5.28376e+06	905846	2.766e+06	2.67102e+06
14	8.27945e+07	46414600	117160000	78567800		14	5.48079e+06	977668	2.36787e+07	3.161e+06
17	1.01654e+08	5.37259e+07	1.18213e+08	8.38797e+07		17	2.72097e+06	759463	640704	6.25343e+06
